# Supplementary material for: Identification of Commercial Cultivars in the Tabebuia Alliance Using Genotyping-by-Sequencing
Source: MDPI journal article supplement (doi:10.3390/f14020271), 2023-01-31
Supplement: s1 [file s1]

**Table S1.** High-quality loci could be used for distinguish different groups

| Scaffolds      | Position | Available        | Available        |
|----------------|----------|------------------|------------------|
| NKXS01000147.1 | 91592    | Group1 VS Group2 | Group2 VS Group3 |
| NKXS01000371.1 | 62962    | Group1 VS Group2 | Group2 VS Group3 |
| NKXS01000371.1 | 63101    | Group1 VS Group2 | Group2 VS Group3 |
| NKXS01000437.1 | 6003     | Group1 VS Group2 | Group2 VS Group3 |
| NKXS01000454.1 | 122027   | Group1 VS Group2 | Group2 VS Group3 |
| NKXS01000454.1 | 122172   | Group1 VS Group2 | Group2 VS Group3 |
| NKXS01000733.1 | 90907    | Group1 VS Group2 | Group2 VS Group3 |
| NKXS01000733.1 | 91081    | Group1 VS Group2 | Group2 VS Group3 |
| NKXS01000844.1 | 149762   | Group1 VS Group2 | Group2 VS Group3 |
| NKXS01002066.1 | 20451    | Group1 VS Group2 | Group2 VS Group3 |
| NKXS01002626.1 | 38014    | Group1 VS Group2 | Group2 VS Group3 |
| NKXS01002684.1 | 2957     | Group1 VS Group2 | Group2 VS Group3 |
| NKXS01003056.1 | 67367    | Group1 VS Group2 | Group2 VS Group3 |
| NKXS01003645.1 | 12056    | Group1 VS Group2 | Group2 VS Group3 |
| NKXS01003646.1 | 74491    | Group1 VS Group2 | Group2 VS Group3 |
| NKXS01003956.1 | 23745    | Group1 VS Group2 | Group2 VS Group3 |
| NKXS01003956.1 | 23913    | Group1 VS Group2 | Group2 VS Group3 |
| NKXS01003978.1 | 39150    | Group1 VS Group2 | Group2 VS Group3 |
| NKXS01004120.1 | 22224    | Group1 VS Group2 | Group2 VS Group3 |
| NKXS01004120.1 | 22355    | Group1 VS Group2 | Group2 VS Group3 |
| NKXS01004543.1 | 43763    | Group1 VS Group2 | Group2 VS Group3 |
| NKXS01004543.1 | 43817    | Group1 VS Group2 | Group2 VS Group3 |
| NKXS01004543.1 | 43820    | Group1 VS Group2 | Group2 VS Group3 |
| NKXS01004543.1 | 43823    | Group1 VS Group2 | Group2 VS Group3 |
| NKXS01004543.1 | 43931    | Group1 VS Group2 | Group2 VS Group3 |
| NKXS01004543.1 | 44007    | Group1 VS Group2 | Group2 VS Group3 |
| NKXS01005396.1 | 90924    | Group1 VS Group2 | Group2 VS Group3 |
| NKXS01005539.1 | 27345    | Group1 VS Group2 | Group2 VS Group3 |
| NKXS01005789.1 | 10752    | Group1 VS Group2 | Group2 VS Group3 |
| NKXS01006038.1 | 24411    | Group1 VS Group2 | Group2 VS Group3 |
| NKXS01006038.1 | 24419    | Group1 VS Group2 | Group2 VS Group3 |
| NKXS01006038.1 | 24426    | Group1 VS Group2 | Group2 VS Group3 |
| NKXS01006113.1 | 2628     | Group1 VS Group2 | Group2 VS Group3 |
| NKXS01006289.1 | 3217     | Group1 VS Group2 | Group2 VS Group3 |
| NKXS01007455.1 | 15156    | Group1 VS Group2 | Group2 VS Group3 |
| NKXS01000114.1 | 115563   | Group2 VS Group3 | Group1 VS Group3 |
| NKXS01000147.1 | 91542    | Group1 VS Group2 | Group1 VS Group3 |
| NKXS01000147.1 | 91605    | Group1 VS Group2 | Group1 VS Group3 |
| NKXS01000147.1 | 91607    | Group1 VS Group2 | Group1 VS Group3 |
| NKXS01000147.1 | 91608    | Group1 VS Group2 | Group1 VS Group3 |
| NKXS01000230.1 | 85837    | Group2 VS Group3 | Group1 VS Group3 |

|                |        |                  |                  |
|----------------|--------|------------------|------------------|
| NKXS01000371.1 | 63146  | Group1 VS Group2 | Group1 VS Group3 |
| NKXS01000371.1 | 63179  | Group1 VS Group2 | Group1 VS Group3 |
| NKXS01000410.1 | 47259  | Group2 VS Group3 | Group1 VS Group3 |
| NKXS01000410.1 | 47346  | Group2 VS Group3 | Group1 VS Group3 |
| NKXS01000410.1 | 47376  | Group2 VS Group3 | Group1 VS Group3 |
| NKXS01000410.1 | 47443  | Group2 VS Group3 | Group1 VS Group3 |
| NKXS01000437.1 | 5913   | Group1 VS Group2 | Group1 VS Group3 |
| NKXS01000454.1 | 122130 | Group2 VS Group3 | Group1 VS Group3 |
| NKXS01000662.1 | 95796  | Group2 VS Group3 | Group1 VS Group3 |
| NKXS01000662.1 | 95823  | Group2 VS Group3 | Group1 VS Group3 |
| NKXS01000733.1 | 6783   | Group2 VS Group3 | Group1 VS Group3 |
| NKXS01000733.1 | 6796   | Group2 VS Group3 | Group1 VS Group3 |
| NKXS01000733.1 | 6867   | Group2 VS Group3 | Group1 VS Group3 |
| NKXS01000733.1 | 6882   | Group2 VS Group3 | Group1 VS Group3 |
| NKXS01000733.1 | 6885   | Group2 VS Group3 | Group1 VS Group3 |
| NKXS01000733.1 | 6886   | Group2 VS Group3 | Group1 VS Group3 |
| NKXS01000733.1 | 6958   | Group2 VS Group3 | Group1 VS Group3 |
| NKXS01000733.1 | 6963   | Group2 VS Group3 | Group1 VS Group3 |
| NKXS01000733.1 | 90983  | Group2 VS Group3 | Group1 VS Group3 |
| NKXS01000733.1 | 90988  | Group1 VS Group2 | Group1 VS Group3 |
| NKXS01000733.1 | 91000  | Group1 VS Group2 | Group1 VS Group3 |
| NKXS01000733.1 | 91164  | Group2 VS Group3 | Group1 VS Group3 |
| NKXS01000791.1 | 14425  | Group2 VS Group3 | Group1 VS Group3 |
| NKXS01000791.1 | 14473  | Group2 VS Group3 | Group1 VS Group3 |
| NKXS01000791.1 | 14533  | Group2 VS Group3 | Group1 VS Group3 |
| NKXS01000791.1 | 14563  | Group2 VS Group3 | Group1 VS Group3 |
| NKXS01000791.1 | 14587  | Group2 VS Group3 | Group1 VS Group3 |
| NKXS01000791.1 | 14635  | Group2 VS Group3 | Group1 VS Group3 |
| NKXS01000791.1 | 14695  | Group2 VS Group3 | Group1 VS Group3 |
| NKXS01000891.1 | 36063  | Group2 VS Group3 | Group1 VS Group3 |
| NKXS01000891.1 | 36125  | Group2 VS Group3 | Group1 VS Group3 |
| NKXS01000891.1 | 36146  | Group2 VS Group3 | Group1 VS Group3 |
| NKXS01000891.1 | 36180  | Group2 VS Group3 | Group1 VS Group3 |
| NKXS01000891.1 | 36221  | Group1 VS Group2 | Group1 VS Group3 |
| NKXS01000891.1 | 36224  | Group2 VS Group3 | Group1 VS Group3 |
| NKXS01000891.1 | 36266  | Group1 VS Group2 | Group1 VS Group3 |
| NKXS01001329.1 | 96233  | Group2 VS Group3 | Group1 VS Group3 |
| NKXS01001329.1 | 96258  | Group2 VS Group3 | Group1 VS Group3 |
| NKXS01001329.1 | 96300  | Group2 VS Group3 | Group1 VS Group3 |
| NKXS01001466.1 | 147669 | Group1 VS Group2 | Group1 VS Group3 |
| NKXS01001466.1 | 147755 | Group1 VS Group2 | Group1 VS Group3 |
| NKXS01001466.1 | 147787 | Group2 VS Group3 | Group1 VS Group3 |
| NKXS01001466.1 | 147882 | Group2 VS Group3 | Group1 VS Group3 |
| NKXS01001777.1 | 28533  | Group2 VS Group3 | Group1 VS Group3 |

|                |       |                  |                  |
|----------------|-------|------------------|------------------|
| NKXS01001777.1 | 28548 | Group2 VS Group3 | Group1 VS Group3 |
| NKXS01001777.1 | 28626 | Group2 VS Group3 | Group1 VS Group3 |
| NKXS01001777.1 | 28635 | Group2 VS Group3 | Group1 VS Group3 |
| NKXS01001777.1 | 28728 | Group2 VS Group3 | Group1 VS Group3 |
| NKXS01001777.1 | 28754 | Group2 VS Group3 | Group1 VS Group3 |
| NKXS01001777.1 | 28779 | Group1 VS Group2 | Group1 VS Group3 |
| NKXS01002066.1 | 20516 | Group1 VS Group2 | Group1 VS Group3 |
| NKXS01002066.1 | 20525 | Group1 VS Group2 | Group1 VS Group3 |
| NKXS01002126.1 | 81156 | Group2 VS Group3 | Group1 VS Group3 |
| NKXS01002126.1 | 81320 | Group2 VS Group3 | Group1 VS Group3 |
| NKXS01002126.1 | 81395 | Group2 VS Group3 | Group1 VS Group3 |
| NKXS01002382.1 | 64915 | Group2 VS Group3 | Group1 VS Group3 |
| NKXS01002626.1 | 37790 | Group2 VS Group3 | Group1 VS Group3 |
| NKXS01002626.1 | 37921 | Group2 VS Group3 | Group1 VS Group3 |
| NKXS01002626.1 | 37942 | Group2 VS Group3 | Group1 VS Group3 |
| NKXS01002626.1 | 37951 | Group2 VS Group3 | Group1 VS Group3 |
| NKXS01002626.1 | 37952 | Group2 VS Group3 | Group1 VS Group3 |
| NKXS01002626.1 | 38017 | Group2 VS Group3 | Group1 VS Group3 |
| NKXS01002675.1 | 67064 | Group1 VS Group2 | Group1 VS Group3 |
| NKXS01002675.1 | 67161 | Group2 VS Group3 | Group1 VS Group3 |
| NKXS01002675.1 | 67194 | Group1 VS Group2 | Group1 VS Group3 |
| NKXS01002675.1 | 67244 | Group1 VS Group2 | Group1 VS Group3 |
| NKXS01003022.1 | 13553 | Group2 VS Group3 | Group1 VS Group3 |
| NKXS01003022.1 | 13640 | Group2 VS Group3 | Group1 VS Group3 |
| NKXS01003043.1 | 74772 | Group1 VS Group2 | Group1 VS Group3 |
| NKXS01003043.1 | 74820 | Group1 VS Group2 | Group1 VS Group3 |
| NKXS01003645.1 | 11917 | Group1 VS Group2 | Group1 VS Group3 |
| NKXS01003645.1 | 11930 | Group1 VS Group2 | Group1 VS Group3 |
| NKXS01003645.1 | 11936 | Group2 VS Group3 | Group1 VS Group3 |
| NKXS01003645.1 | 11987 | Group2 VS Group3 | Group1 VS Group3 |
| NKXS01003645.1 | 12062 | Group1 VS Group2 | Group1 VS Group3 |
| NKXS01003646.1 | 74432 | Group1 VS Group2 | Group1 VS Group3 |
| NKXS01003646.1 | 74611 | Group1 VS Group2 | Group1 VS Group3 |
| NKXS01003646.1 | 74635 | Group1 VS Group2 | Group1 VS Group3 |
| NKXS01003929.1 | 51090 | Group2 VS Group3 | Group1 VS Group3 |
| NKXS01003929.1 | 51102 | Group2 VS Group3 | Group1 VS Group3 |
| NKXS01003929.1 | 51141 | Group2 VS Group3 | Group1 VS Group3 |
| NKXS01003929.1 | 51221 | Group2 VS Group3 | Group1 VS Group3 |
| NKXS01003956.1 | 23709 | Group1 VS Group2 | Group1 VS Group3 |
| NKXS01003956.1 | 23715 | Group1 VS Group2 | Group1 VS Group3 |
| NKXS01003956.1 | 23784 | Group1 VS Group2 | Group1 VS Group3 |
| NKXS01003956.1 | 23787 | Group1 VS Group2 | Group1 VS Group3 |
| NKXS01003956.1 | 23832 | Group1 VS Group2 | Group1 VS Group3 |
| NKXS01003956.1 | 23901 | Group1 VS Group2 | Group1 VS Group3 |

|                |       |                  |                  |
|----------------|-------|------------------|------------------|
| NKXS01003978.1 | 39021 | Group2 VS Group3 | Group1 VS Group3 |
| NKXS01003978.1 | 39084 | Group2 VS Group3 | Group1 VS Group3 |
| NKXS01003978.1 | 39097 | Group1 VS Group2 | Group1 VS Group3 |
| NKXS01003978.1 | 39171 | Group2 VS Group3 | Group1 VS Group3 |
| NKXS01003978.1 | 39187 | Group2 VS Group3 | Group1 VS Group3 |
| NKXS01003978.1 | 39198 | Group2 VS Group3 | Group1 VS Group3 |
| NKXS01003978.1 | 39219 | Group2 VS Group3 | Group1 VS Group3 |
| NKXS01003978.1 | 39237 | Group2 VS Group3 | Group1 VS Group3 |
| NKXS01003978.1 | 39252 | Group1 VS Group2 | Group1 VS Group3 |
| NKXS01003978.1 | 39276 | Group1 VS Group2 | Group1 VS Group3 |
| NKXS01003984.1 | 39366 | Group2 VS Group3 | Group1 VS Group3 |
| NKXS01003984.1 | 39383 | Group2 VS Group3 | Group1 VS Group3 |
| NKXS01003984.1 | 39393 | Group2 VS Group3 | Group1 VS Group3 |
| NKXS01003984.1 | 39553 | Group1 VS Group2 | Group1 VS Group3 |
| NKXS01004120.1 | 22256 | Group2 VS Group3 | Group1 VS Group3 |
| NKXS01004217.1 | 12849 | Group1 VS Group2 | Group1 VS Group3 |
| NKXS01004217.1 | 12908 | Group1 VS Group2 | Group1 VS Group3 |
| NKXS01004486.1 | 40000 | Group1 VS Group2 | Group1 VS Group3 |
| NKXS01004508.1 | 9665  | Group1 VS Group2 | Group1 VS Group3 |
| NKXS01004543.1 | 43781 | Group1 VS Group2 | Group1 VS Group3 |
| NKXS01004543.1 | 43790 | Group2 VS Group3 | Group1 VS Group3 |
| NKXS01004543.1 | 43841 | Group1 VS Group2 | Group1 VS Group3 |
| NKXS01004543.1 | 43892 | Group2 VS Group3 | Group1 VS Group3 |
| NKXS01004543.1 | 43898 | Group1 VS Group2 | Group1 VS Group3 |
| NKXS01004543.1 | 43961 | Group1 VS Group2 | Group1 VS Group3 |
| NKXS01004944.1 | 45153 | Group2 VS Group3 | Group1 VS Group3 |
| NKXS01005396.1 | 90922 | Group1 VS Group2 | Group1 VS Group3 |
| NKXS01005539.1 | 27440 | Group1 VS Group2 | Group1 VS Group3 |
| NKXS01005539.1 | 27597 | Group1 VS Group2 | Group1 VS Group3 |
| NKXS01005789.1 | 10579 | Group2 VS Group3 | Group1 VS Group3 |
| NKXS01005789.1 | 10686 | Group2 VS Group3 | Group1 VS Group3 |
| NKXS01005789.1 | 10715 | Group2 VS Group3 | Group1 VS Group3 |
| NKXS01005789.1 | 10751 | Group2 VS Group3 | Group1 VS Group3 |
| NKXS01005789.1 | 10794 | Group2 VS Group3 | Group1 VS Group3 |
| NKXS01005789.1 | 10809 | Group2 VS Group3 | Group1 VS Group3 |
| NKXS01005969.1 | 11143 | Group2 VS Group3 | Group1 VS Group3 |
| NKXS01005969.1 | 11156 | Group2 VS Group3 | Group1 VS Group3 |
| NKXS01005969.1 | 11224 | Group2 VS Group3 | Group1 VS Group3 |
| NKXS01005969.1 | 11239 | Group2 VS Group3 | Group1 VS Group3 |
| NKXS01005969.1 | 11332 | Group2 VS Group3 | Group1 VS Group3 |
| NKXS01006000.1 | 40715 | Group2 VS Group3 | Group1 VS Group3 |
| NKXS01006038.1 | 24264 | Group1 VS Group2 | Group1 VS Group3 |
| NKXS01006038.1 | 24294 | Group1 VS Group2 | Group1 VS Group3 |
| NKXS01006038.1 | 24311 | Group1 VS Group2 | Group1 VS Group3 |

|                |        |                  |                  |
|----------------|--------|------------------|------------------|
| NKXS01006038.1 | 24363  | Group1 VS Group2 | Group1 VS Group3 |
| NKXS01006038.1 | 24378  | Group1 VS Group2 | Group1 VS Group3 |
| NKXS01006038.1 | 24432  | Group1 VS Group2 | Group1 VS Group3 |
| NKXS01006289.1 | 3187   | Group2 VS Group3 | Group1 VS Group3 |
| NKXS01007229.1 | 19432  | Group2 VS Group3 | Group1 VS Group3 |
| NKXS01007229.1 | 19500  | Group2 VS Group3 | Group1 VS Group3 |
| NKXS01007229.1 | 19553  | Group2 VS Group3 | Group1 VS Group3 |
| NKXS01007229.1 | 19555  | Group2 VS Group3 | Group1 VS Group3 |
| NKXS01007229.1 | 19588  | Group2 VS Group3 | Group1 VS Group3 |
| NKXS01007455.1 | 15184  | Group1 VS Group2 | Group1 VS Group3 |
| NKXS01007455.1 | 15209  | Group2 VS Group3 | Group1 VS Group3 |
| NKXS01007455.1 | 15304  | Group2 VS Group3 | Group1 VS Group3 |
| NKXS01007455.1 | 15364  | Group2 VS Group3 | Group1 VS Group3 |
| NKXS01007455.1 | 15403  | Group2 VS Group3 | Group1 VS Group3 |
| NKXS01007455.1 | 15406  | Group2 VS Group3 | Group1 VS Group3 |
| NKXS01007580.1 | 2111   | Group2 VS Group3 | Group1 VS Group3 |
| NKXS01007580.1 | 2119   | Group2 VS Group3 | Group1 VS Group3 |
| NKXS01008255.1 | 6309   | Group2 VS Group3 | Group1 VS Group3 |
| NKXS01000014.1 | 495887 | Group2 VS Group3 |                  |
| NKXS01000014.1 | 496091 | Group2 VS Group3 |                  |
| NKXS01000014.1 | 496096 | Group2 VS Group3 |                  |
| NKXS01000030.1 | 357757 | Group1 VS Group3 |                  |
| NKXS01000097.1 | 67734  | Group2 VS Group3 |                  |
| NKXS01000110.1 | 109826 | Group1 VS Group3 |                  |
| NKXS01000110.1 | 109910 | Group1 VS Group3 |                  |
| NKXS01000110.1 | 109926 | Group1 VS Group3 |                  |
| NKXS01000110.1 | 110003 | Group1 VS Group3 |                  |
| NKXS01000203.1 | 38650  | Group2 VS Group3 |                  |
| NKXS01000230.1 | 85909  | Group1 VS Group3 |                  |
| NKXS01000269.1 | 50092  | Group1 VS Group2 |                  |
| NKXS01000269.1 | 50180  | Group1 VS Group2 |                  |
| NKXS01000269.1 | 50246  | Group1 VS Group2 |                  |
| NKXS01000278.1 | 104690 | Group1 VS Group2 |                  |
| NKXS01000410.1 | 47265  | Group1 VS Group3 |                  |
| NKXS01000662.1 | 95783  | Group1 VS Group3 |                  |
| NKXS01000662.1 | 95847  | Group1 VS Group3 |                  |
| NKXS01000662.1 | 95912  | Group1 VS Group3 |                  |
| NKXS01000699.1 | 166370 | Group1 VS Group3 |                  |
| NKXS01000699.1 | 166378 | Group1 VS Group3 |                  |
| NKXS01000699.1 | 166397 | Group1 VS Group3 |                  |
| NKXS01000709.1 | 29595  | Group2 VS Group3 |                  |
| NKXS01000733.1 | 6955   | Group2 VS Group3 |                  |
| NKXS01000733.1 | 90973  | Group1 VS Group2 |                  |
| NKXS01000733.1 | 91109  | Group1 VS Group3 |                  |

|                |        |                  |
|----------------|--------|------------------|
| NKXS01000733.1 | 91147  | Group1 VS Group3 |
| NKXS01000733.1 | 91149  | Group1 VS Group3 |
| NKXS01000777.1 | 8294   | Group1 VS Group2 |
| NKXS01000814.1 | 20833  | Group2 VS Group3 |
| NKXS01000858.1 | 11068  | Group1 VS Group2 |
| NKXS01000858.1 | 11117  | Group1 VS Group2 |
| NKXS01000863.1 | 154133 | Group1 VS Group3 |
| NKXS01000873.1 | 6723   | Group2 VS Group3 |
| NKXS01000873.1 | 6779   | Group2 VS Group3 |
| NKXS01000873.1 | 6790   | Group2 VS Group3 |
| NKXS01000873.1 | 6811   | Group2 VS Group3 |
| NKXS01000873.1 | 6832   | Group2 VS Group3 |
| NKXS01000873.1 | 6850   | Group2 VS Group3 |
| NKXS01000873.1 | 6913   | Group2 VS Group3 |
| NKXS01000877.1 | 93946  | Group1 VS Group2 |
| NKXS01000891.1 | 36186  | Group1 VS Group3 |
| NKXS01001197.1 | 3593   | Group1 VS Group2 |
| NKXS01001220.1 | 40545  | Group1 VS Group3 |
| NKXS01001222.1 | 8428   | Group1 VS Group3 |
| NKXS01001252.1 | 93689  | Group2 VS Group3 |
| NKXS01001252.1 | 93742  | Group2 VS Group3 |
| NKXS01001252.1 | 93794  | Group2 VS Group3 |
| NKXS01001252.1 | 93815  | Group2 VS Group3 |
| NKXS01001252.1 | 93884  | Group2 VS Group3 |
| NKXS01001325.1 | 168894 | Group1 VS Group3 |
| NKXS01001328.1 | 60470  | Group1 VS Group3 |
| NKXS01001328.1 | 60471  | Group1 VS Group3 |
| NKXS01001328.1 | 60543  | Group1 VS Group3 |
| NKXS01001328.1 | 60637  | Group1 VS Group3 |
| NKXS01001329.1 | 96230  | Group1 VS Group3 |
| NKXS01001329.1 | 96260  | Group1 VS Group3 |
| NKXS01001329.1 | 96288  | Group1 VS Group3 |
| NKXS01001369.1 | 148922 | Group1 VS Group3 |
| NKXS01001369.1 | 149040 | Group1 VS Group3 |
| NKXS01001369.1 | 149153 | Group1 VS Group3 |
| NKXS01001369.1 | 149167 | Group1 VS Group3 |
| NKXS01001446.1 | 56209  | Group2 VS Group3 |
| NKXS01001446.1 | 56224  | Group2 VS Group3 |
| NKXS01001446.1 | 56233  | Group2 VS Group3 |
| NKXS01001446.1 | 56251  | Group2 VS Group3 |
| NKXS01001446.1 | 56327  | Group2 VS Group3 |
| NKXS01001446.1 | 56365  | Group2 VS Group3 |
| NKXS01001446.1 | 56461  | Group2 VS Group3 |
| NKXS01001466.1 | 147884 | Group1 VS Group3 |

|                |        |                  |
|----------------|--------|------------------|
| NKXS01001525.1 | 57144  | Group1 VS Group2 |
| NKXS01001642.1 | 75917  | Group1 VS Group2 |
| NKXS01001642.1 | 76112  | Group1 VS Group2 |
| NKXS01001680.1 | 10154  | Group1 VS Group3 |
| NKXS01001680.1 | 10223  | Group1 VS Group3 |
| NKXS01001777.1 | 28721  | Group1 VS Group2 |
| NKXS01001777.1 | 28790  | Group1 VS Group3 |
| NKXS01001857.1 | 31350  | Group1 VS Group3 |
| NKXS01001987.1 | 141137 | Group1 VS Group3 |
| NKXS01001991.1 | 34802  | Group1 VS Group2 |
| NKXS01001995.1 | 112623 | Group1 VS Group2 |
| NKXS01001995.1 | 112642 | Group1 VS Group2 |
| NKXS01001995.1 | 112651 | Group1 VS Group2 |
| NKXS01002126.1 | 81339  | Group2 VS Group3 |
| NKXS01002126.1 | 81408  | Group1 VS Group3 |
| NKXS01002196.1 | 20325  | Group1 VS Group2 |
| NKXS01002411.1 | 90610  | Group1 VS Group2 |
| NKXS01002411.1 | 90628  | Group1 VS Group2 |
| NKXS01002411.1 | 90726  | Group1 VS Group2 |
| NKXS01002555.1 | 33087  | Group1 VS Group3 |
| NKXS01002555.1 | 33107  | Group1 VS Group3 |
| NKXS01002555.1 | 33186  | Group1 VS Group3 |
| NKXS01002555.1 | 33214  | Group1 VS Group3 |
| NKXS01002561.1 | 2238   | Group1 VS Group3 |
| NKXS01002561.1 | 2253   | Group1 VS Group3 |
| NKXS01002626.1 | 37991  | Group1 VS Group3 |
| NKXS01002626.1 | 37994  | Group2 VS Group3 |
| NKXS01002675.1 | 94791  | Group1 VS Group3 |
| NKXS01002675.1 | 94929  | Group1 VS Group3 |
| NKXS01002705.1 | 111728 | Group1 VS Group3 |
| NKXS01002705.1 | 111829 | Group1 VS Group3 |
| NKXS01002705.1 | 111832 | Group1 VS Group3 |
| NKXS01002705.1 | 111906 | Group1 VS Group3 |
| NKXS01002705.1 | 111908 | Group1 VS Group3 |
| NKXS01002705.1 | 111923 | Group1 VS Group3 |
| NKXS01002705.1 | 111984 | Group1 VS Group3 |
| NKXS01002866.1 | 46349  | Group1 VS Group2 |
| NKXS01002941.1 | 14273  | Group1 VS Group3 |
| NKXS01002941.1 | 14276  | Group1 VS Group3 |
| NKXS01002941.1 | 14382  | Group1 VS Group3 |
| NKXS01003142.1 | 55160  | Group1 VS Group2 |
| NKXS01003142.1 | 55207  | Group1 VS Group2 |
| NKXS01003142.1 | 55213  | Group1 VS Group2 |
| NKXS01003142.1 | 55270  | Group1 VS Group2 |

|                |       |                  |
|----------------|-------|------------------|
| NKXS01003242.1 | 22650 | Group1 VS Group3 |
| NKXS01003242.1 | 22671 | Group1 VS Group3 |
| NKXS01003242.1 | 22710 | Group1 VS Group3 |
| NKXS01003278.1 | 59837 | Group1 VS Group2 |
| NKXS01003313.1 | 38092 | Group1 VS Group2 |
| NKXS01003313.1 | 38218 | Group1 VS Group2 |
| NKXS01003313.1 | 38308 | Group1 VS Group2 |
| NKXS01003474.1 | 56118 | Group1 VS Group3 |
| NKXS01003474.1 | 56122 | Group1 VS Group3 |
| NKXS01003474.1 | 56158 | Group1 VS Group3 |
| NKXS01003474.1 | 56228 | Group1 VS Group3 |
| NKXS01003474.1 | 56240 | Group1 VS Group3 |
| NKXS01003480.1 | 9387  | Group1 VS Group3 |
| NKXS01003480.1 | 9451  | Group1 VS Group3 |
| NKXS01003480.1 | 9505  | Group1 VS Group3 |
| NKXS01003480.1 | 9511  | Group1 VS Group3 |
| NKXS01003480.1 | 9565  | Group1 VS Group3 |
| NKXS01003480.1 | 9601  | Group1 VS Group3 |
| NKXS01003480.1 | 9636  | Group1 VS Group3 |
| NKXS01003490.1 | 12704 | Group1 VS Group3 |
| NKXS01003645.1 | 11925 | Group1 VS Group3 |
| NKXS01003743.1 | 18325 | Group1 VS Group2 |
| NKXS01003821.1 | 81016 | Group1 VS Group2 |
| NKXS01003821.1 | 81025 | Group1 VS Group2 |
| NKXS01003821.1 | 81226 | Group1 VS Group2 |
| NKXS01003829.1 | 32889 | Group1 VS Group2 |
| NKXS01003829.1 | 32891 | Group1 VS Group2 |
| NKXS01003854.1 | 25107 | Group2 VS Group3 |
| NKXS01003876.1 | 40495 | Group2 VS Group3 |
| NKXS01003929.1 | 51059 | Group1 VS Group3 |
| NKXS01003929.1 | 51225 | Group1 VS Group3 |
| NKXS01003956.1 | 23920 | Group1 VS Group3 |
| NKXS01003978.1 | 39270 | Group1 VS Group3 |
| NKXS01003981.1 | 26450 | Group2 VS Group3 |
| NKXS01003982.1 | 17568 | Group1 VS Group3 |
| NKXS01003982.1 | 17633 | Group1 VS Group3 |
| NKXS01003982.1 | 17641 | Group1 VS Group3 |
| NKXS01003982.1 | 17694 | Group1 VS Group3 |
| NKXS01003982.1 | 17710 | Group1 VS Group3 |
| NKXS01003984.1 | 39380 | Group1 VS Group2 |
| NKXS01003984.1 | 39418 | Group1 VS Group2 |
| NKXS01003984.1 | 39463 | Group1 VS Group3 |
| NKXS01003984.1 | 39532 | Group1 VS Group3 |
| NKXS01003984.1 | 39559 | Group1 VS Group3 |



|                |       |                  |
|----------------|-------|------------------|
| NKXS01004217.1 | 13018 | Group2 VS Group3 |
| NKXS01004338.1 | 17986 | Group1 VS Group2 |
| NKXS01004338.1 | 18037 | Group1 VS Group2 |
| NKXS01004369.1 | 11383 | Group1 VS Group2 |
| NKXS01004369.1 | 11431 | Group1 VS Group2 |
| NKXS01004486.1 | 40040 | Group1 VS Group3 |
| NKXS01004536.1 | 39476 | Group1 VS Group2 |
| NKXS01004539.1 | 1387  | Group1 VS Group2 |
| NKXS01004626.1 | 8638  | Group1 VS Group2 |
| NKXS01004626.1 | 8800  | Group1 VS Group2 |
| NKXS01004626.1 | 8863  | Group1 VS Group2 |
| NKXS01004673.1 | 22023 | Group2 VS Group3 |
| NKXS01004673.1 | 22038 | Group2 VS Group3 |
| NKXS01004944.1 | 45080 | Group2 VS Group3 |
| NKXS01004944.1 | 45090 | Group2 VS Group3 |
| NKXS01004944.1 | 45092 | Group2 VS Group3 |
| NKXS01004944.1 | 45115 | Group2 VS Group3 |
| NKXS01004944.1 | 45119 | Group2 VS Group3 |
| NKXS01004944.1 | 45356 | Group2 VS Group3 |
| NKXS01005229.1 | 43766 | Group1 VS Group3 |
| NKXS01005229.1 | 43780 | Group1 VS Group3 |
| NKXS01005365.1 | 10712 | Group1 VS Group3 |
| NKXS01005365.1 | 10736 | Group1 VS Group3 |
| NKXS01005365.1 | 10772 | Group1 VS Group3 |
| NKXS01005365.1 | 10778 | Group1 VS Group3 |
| NKXS01005365.1 | 10819 | Group1 VS Group3 |
| NKXS01005365.1 | 10874 | Group1 VS Group3 |
| NKXS01005365.1 | 10891 | Group1 VS Group3 |
| NKXS01005365.1 | 10895 | Group1 VS Group3 |
| NKXS01005396.1 | 90956 | Group1 VS Group3 |
| NKXS01005481.1 | 9446  | Group2 VS Group3 |
| NKXS01005481.1 | 9502  | Group2 VS Group3 |
| NKXS01005481.1 | 9600  | Group2 VS Group3 |
| NKXS01005511.1 | 6580  | Group1 VS Group2 |
| NKXS01005511.1 | 6625  | Group1 VS Group2 |
| NKXS01005511.1 | 6742  | Group1 VS Group2 |
| NKXS01005539.1 | 27366 | Group2 VS Group3 |
| NKXS01005539.1 | 27423 | Group1 VS Group2 |
| NKXS01005789.1 | 10566 | Group1 VS Group3 |
| NKXS01005789.1 | 10605 | Group1 VS Group3 |
| NKXS01005789.1 | 10625 | Group1 VS Group3 |
| NKXS01005789.1 | 10660 | Group1 VS Group2 |
| NKXS01005789.1 | 10669 | Group1 VS Group3 |
| NKXS01006000.1 | 40829 | Group1 VS Group3 |

|                |       |                  |
|----------------|-------|------------------|
| NKXS01006286.1 | 28068 | Group1 VS Group3 |
| NKXS01006286.1 | 28109 | Group1 VS Group3 |
| NKXS01006286.1 | 28182 | Group1 VS Group3 |
| NKXS01006289.1 | 3043  | Group2 VS Group3 |
| NKXS01006289.1 | 3055  | Group2 VS Group3 |
| NKXS01006289.1 | 3127  | Group1 VS Group3 |
| NKXS01006289.1 | 3169  | Group2 VS Group3 |
| NKXS01006438.1 | 29507 | Group1 VS Group2 |
| NKXS01006438.1 | 29513 | Group1 VS Group2 |
| NKXS01006438.1 | 29527 | Group1 VS Group2 |
| NKXS01006502.1 | 20790 | Group1 VS Group3 |
| NKXS01006502.1 | 20814 | Group1 VS Group3 |
| NKXS01006626.1 | 21568 | Group2 VS Group3 |
| NKXS01006626.1 | 21618 | Group2 VS Group3 |
| NKXS01006626.1 | 21659 | Group2 VS Group3 |
| NKXS01006626.1 | 21702 | Group2 VS Group3 |
| NKXS01006626.1 | 21753 | Group2 VS Group3 |
| NKXS01006626.1 | 21766 | Group2 VS Group3 |
| NKXS01006626.1 | 21768 | Group2 VS Group3 |
| NKXS01006626.1 | 21778 | Group2 VS Group3 |
| NKXS01006626.1 | 21824 | Group2 VS Group3 |
| NKXS01006739.1 | 20640 | Group1 VS Group2 |
| NKXS01006739.1 | 20658 | Group1 VS Group2 |
| NKXS01006800.1 | 19419 | Group1 VS Group2 |
| NKXS01006800.1 | 19456 | Group1 VS Group2 |
| NKXS01006800.1 | 19459 | Group1 VS Group2 |
| NKXS01006800.1 | 19524 | Group1 VS Group2 |
| NKXS01006800.1 | 19526 | Group1 VS Group2 |
| NKXS01006800.1 | 19540 | Group1 VS Group2 |
| NKXS01006800.1 | 19609 | Group1 VS Group2 |
| NKXS01006800.1 | 19619 | Group1 VS Group2 |
| NKXS01006800.1 | 19620 | Group1 VS Group2 |
| NKXS01007170.1 | 20842 | Group2 VS Group3 |
| NKXS01007170.1 | 20876 | Group2 VS Group3 |
| NKXS01007188.1 | 20513 | Group1 VS Group2 |
| NKXS01007188.1 | 20526 | Group1 VS Group2 |
| NKXS01007188.1 | 20566 | Group1 VS Group2 |
| NKXS01007188.1 | 20589 | Group1 VS Group2 |
| NKXS01007188.1 | 20602 | Group1 VS Group2 |
| NKXS01007229.1 | 19501 | Group2 VS Group3 |
| NKXS01007405.1 | 25460 | Group1 VS Group2 |
| NKXS01007455.1 | 15307 | Group1 VS Group3 |
| NKXS01007461.1 | 21560 | Group1 VS Group2 |
| NKXS01007580.1 | 2148  | Group2 VS Group3 |

|                |       |                  |
|----------------|-------|------------------|
| NKXS01007580.1 | 2348  | Group2 VS Group3 |
| NKXS01007673.1 | 15806 | Group1 VS Group3 |
| NKXS01007673.1 | 15911 | Group1 VS Group3 |
| NKXS01007673.1 | 15917 | Group1 VS Group3 |
| NKXS01007685.1 | 10082 | Group1 VS Group3 |
| NKXS01007685.1 | 10087 | Group1 VS Group3 |
| NKXS01007685.1 | 10095 | Group1 VS Group3 |
| NKXS01007685.1 | 10141 | Group1 VS Group3 |
| NKXS01007685.1 | 10163 | Group1 VS Group3 |
| NKXS01007685.1 | 10175 | Group1 VS Group3 |
| NKXS01007685.1 | 10184 | Group1 VS Group3 |
| NKXS01007685.1 | 10199 | Group1 VS Group3 |
| NKXS01007685.1 | 10314 | Group1 VS Group3 |
| NKXS01007704.1 | 14811 | Group1 VS Group2 |
| NKXS01007933.1 | 20396 | Group1 VS Group2 |
| NKXS01008073.1 | 8641  | Group1 VS Group2 |
| NKXS01008073.1 | 8732  | Group1 VS Group2 |
| NKXS01008073.1 | 8778  | Group1 VS Group2 |
| NKXS01008073.1 | 8788  | Group1 VS Group2 |
| NKXS01008082.1 | 22456 | Group2 VS Group3 |
| NKXS01008142.1 | 9614  | Group1 VS Group2 |
| NKXS01008142.1 | 9755  | Group1 VS Group2 |
| NKXS01008169.1 | 31553 | Group1 VS Group3 |
| NKXS01008169.1 | 31572 | Group1 VS Group3 |
| NKXS01008732.1 | 9890  | Group2 VS Group3 |
| NKXS01008896.1 | 9458  | Group1 VS Group2 |
| NKXS01009259.1 | 13466 | Group1 VS Group3 |
| NKXS01009259.1 | 13703 | Group1 VS Group3 |

---
