# Supplementary material for: Identification of Commercial Cultivars in the Tabebuia Alliance Using Genotyping-by-Sequencing
Source: MDPI journal article supplement (doi:10.3390/f14020271), 2023-01-31
Supplement: s1 [file s1]

**Table S7.** High-quality loci could be used for distinguish cultivar in *T. aurea*

| Species         | Scaffolds      | Position | Rate of no-majority genotype |
|-----------------|----------------|----------|------------------------------|
| <i>T. aurea</i> | NKXS01000097.1 | 29568    | 0.60                         |
| <i>T. aurea</i> | NKXS01001211.1 | 166597   | 0.60                         |
| <i>T. aurea</i> | NKXS01002675.1 | 66996    | 0.60                         |
| <i>T. aurea</i> | NKXS01003333.1 | 79124    | 0.60                         |
| <i>T. aurea</i> | NKXS01003657.1 | 73829    | 0.60                         |
| <i>T. aurea</i> | NKXS01004944.1 | 45094    | 0.60                         |
| <i>T. aurea</i> | NKXS01005765.1 | 6456     | 0.60                         |
| <i>T. aurea</i> | NKXS01008034.1 | 13668    | 0.60                         |
| <i>T. aurea</i> | NKXS01000008.1 | 106734   | 0.40                         |
| <i>T. aurea</i> | NKXS01000030.1 | 357664   | 0.40                         |
| <i>T. aurea</i> | NKXS01000041.1 | 292621   | 0.40                         |
| <i>T. aurea</i> | NKXS01000094.1 | 184759   | 0.40                         |
| <i>T. aurea</i> | NKXS01000097.1 | 67670    | 0.40                         |
| <i>T. aurea</i> | NKXS01000174.1 | 5123     | 0.40                         |
| <i>T. aurea</i> | NKXS01000174.1 | 5160     | 0.40                         |
| <i>T. aurea</i> | NKXS01000189.1 | 129749   | 0.40                         |
| <i>T. aurea</i> | NKXS01000210.1 | 39365    | 0.40                         |
| <i>T. aurea</i> | NKXS01000371.1 | 110961   | 0.40                         |
| <i>T. aurea</i> | NKXS01000410.1 | 47315    | 0.40                         |
| <i>T. aurea</i> | NKXS01000538.1 | 90225    | 0.40                         |
| <i>T. aurea</i> | NKXS01000600.1 | 137478   | 0.40                         |
| <i>T. aurea</i> | NKXS01000701.1 | 102181   | 0.40                         |
| <i>T. aurea</i> | NKXS01000719.1 | 143872   | 0.40                         |
| <i>T. aurea</i> | NKXS01000719.1 | 143880   | 0.40                         |
| <i>T. aurea</i> | NKXS01000719.1 | 144070   | 0.40                         |
| <i>T. aurea</i> | NKXS01000732.1 | 25744    | 0.40                         |
| <i>T. aurea</i> | NKXS01000814.1 | 20748    | 0.40                         |
| <i>T. aurea</i> | NKXS01000814.1 | 20843    | 0.40                         |
| <i>T. aurea</i> | NKXS01000820.1 | 17177    | 0.40                         |
| <i>T. aurea</i> | NKXS01000820.1 | 104786   | 0.40                         |
| <i>T. aurea</i> | NKXS01000891.1 | 36041    | 0.40                         |
| <i>T. aurea</i> | NKXS01000891.1 | 36068    | 0.40                         |
| <i>T. aurea</i> | NKXS01000965.1 | 113996   | 0.40                         |
| <i>T. aurea</i> | NKXS01001025.1 | 12549    | 0.40                         |
| <i>T. aurea</i> | NKXS01001025.1 | 12593    | 0.40                         |
| <i>T. aurea</i> | NKXS01001062.1 | 123086   | 0.40                         |
| <i>T. aurea</i> | NKXS01001062.1 | 123256   | 0.40                         |
| <i>T. aurea</i> | NKXS01001062.1 | 123309   | 0.40                         |
| <i>T. aurea</i> | NKXS01001134.1 | 14407    | 0.40                         |
| <i>T. aurea</i> | NKXS01001245.1 | 13107    | 0.40                         |
| <i>T. aurea</i> | NKXS01001245.1 | 13176    | 0.40                         |

|                 |                |        |      |
|-----------------|----------------|--------|------|
| <i>T. aurea</i> | NKXS01001369.1 | 102259 | 0.40 |
| <i>T. aurea</i> | NKXS01001445.1 | 49378  | 0.40 |
| <i>T. aurea</i> | NKXS01001495.1 | 108890 | 0.40 |
| <i>T. aurea</i> | NKXS01001558.1 | 112756 | 0.40 |
| <i>T. aurea</i> | NKXS01001708.1 | 9431   | 0.40 |
| <i>T. aurea</i> | NKXS01001740.1 | 55568  | 0.40 |
| <i>T. aurea</i> | NKXS01001745.1 | 103754 | 0.40 |
| <i>T. aurea</i> | NKXS01001777.1 | 28721  | 0.40 |
| <i>T. aurea</i> | NKXS01001778.1 | 64649  | 0.40 |
| <i>T. aurea</i> | NKXS01002148.1 | 56986  | 0.40 |
| <i>T. aurea</i> | NKXS01002185.1 | 70410  | 0.40 |
| <i>T. aurea</i> | NKXS01002207.1 | 100412 | 0.40 |
| <i>T. aurea</i> | NKXS01002250.1 | 83359  | 0.40 |
| <i>T. aurea</i> | NKXS01002250.1 | 83519  | 0.40 |
| <i>T. aurea</i> | NKXS01002250.1 | 83570  | 0.40 |
| <i>T. aurea</i> | NKXS01002320.1 | 12599  | 0.40 |
| <i>T. aurea</i> | NKXS01002411.1 | 112997 | 0.40 |
| <i>T. aurea</i> | NKXS01002417.1 | 29441  | 0.40 |
| <i>T. aurea</i> | NKXS01002505.1 | 15629  | 0.40 |
| <i>T. aurea</i> | NKXS01002505.1 | 15814  | 0.40 |
| <i>T. aurea</i> | NKXS01002593.1 | 84538  | 0.40 |
| <i>T. aurea</i> | NKXS01002716.1 | 14972  | 0.40 |
| <i>T. aurea</i> | NKXS01002716.1 | 15017  | 0.40 |
| <i>T. aurea</i> | NKXS01002716.1 | 15073  | 0.40 |
| <i>T. aurea</i> | NKXS01002716.1 | 15102  | 0.40 |
| <i>T. aurea</i> | NKXS01002716.1 | 15137  | 0.40 |
| <i>T. aurea</i> | NKXS01002718.1 | 1741   | 0.40 |
| <i>T. aurea</i> | NKXS01002718.1 | 1793   | 0.40 |
| <i>T. aurea</i> | NKXS01002730.1 | 26545  | 0.40 |
| <i>T. aurea</i> | NKXS01002915.1 | 60059  | 0.40 |
| <i>T. aurea</i> | NKXS01002915.1 | 60155  | 0.40 |
| <i>T. aurea</i> | NKXS01002981.1 | 73328  | 0.40 |
| <i>T. aurea</i> | NKXS01003022.1 | 13449  | 0.40 |
| <i>T. aurea</i> | NKXS01003045.1 | 23124  | 0.40 |
| <i>T. aurea</i> | NKXS01003135.1 | 11327  | 0.40 |
| <i>T. aurea</i> | NKXS01003294.1 | 76831  | 0.40 |
| <i>T. aurea</i> | NKXS01003294.1 | 76896  | 0.40 |
| <i>T. aurea</i> | NKXS01003294.1 | 76899  | 0.40 |
| <i>T. aurea</i> | NKXS01003365.1 | 17773  | 0.40 |
| <i>T. aurea</i> | NKXS01003402.1 | 71867  | 0.40 |
| <i>T. aurea</i> | NKXS01003490.1 | 12821  | 0.40 |
| <i>T. aurea</i> | NKXS01003652.1 | 22202  | 0.40 |
| <i>T. aurea</i> | NKXS01003765.1 | 18613  | 0.40 |
| <i>T. aurea</i> | NKXS01003852.1 | 29352  | 0.40 |

|                 |                |       |      |
|-----------------|----------------|-------|------|
| <i>T. aurea</i> | NKXS01003854.1 | 25164 | 0.40 |
| <i>T. aurea</i> | NKXS01003876.1 | 40414 | 0.40 |
| <i>T. aurea</i> | NKXS01003929.1 | 51197 | 0.40 |
| <i>T. aurea</i> | NKXS01003955.1 | 59167 | 0.40 |
| <i>T. aurea</i> | NKXS01003982.1 | 26202 | 0.40 |
| <i>T. aurea</i> | NKXS01004054.1 | 50688 | 0.40 |
| <i>T. aurea</i> | NKXS01004054.1 | 50721 | 0.40 |
| <i>T. aurea</i> | NKXS01004061.1 | 6870  | 0.40 |
| <i>T. aurea</i> | NKXS01004756.1 | 15600 | 0.40 |
| <i>T. aurea</i> | NKXS01004826.1 | 72399 | 0.40 |
| <i>T. aurea</i> | NKXS01004906.1 | 1210  | 0.40 |
| <i>T. aurea</i> | NKXS01004944.1 | 45200 | 0.40 |
| <i>T. aurea</i> | NKXS01004944.1 | 45227 | 0.40 |
| <i>T. aurea</i> | NKXS01004944.1 | 45332 | 0.40 |
| <i>T. aurea</i> | NKXS01005245.1 | 9940  | 0.40 |
| <i>T. aurea</i> | NKXS01005405.1 | 8735  | 0.40 |
| <i>T. aurea</i> | NKXS01005463.1 | 19583 | 0.40 |
| <i>T. aurea</i> | NKXS01005553.1 | 4131  | 0.40 |
| <i>T. aurea</i> | NKXS01005569.1 | 29282 | 0.40 |
| <i>T. aurea</i> | NKXS01005752.1 | 17054 | 0.40 |
| <i>T. aurea</i> | NKXS01005797.1 | 3227  | 0.40 |
| <i>T. aurea</i> | NKXS01005855.1 | 37143 | 0.40 |
| <i>T. aurea</i> | NKXS01005878.1 | 32842 | 0.40 |
| <i>T. aurea</i> | NKXS01005878.1 | 32893 | 0.40 |
| <i>T. aurea</i> | NKXS01005915.1 | 8662  | 0.40 |
| <i>T. aurea</i> | NKXS01006150.1 | 23468 | 0.40 |
| <i>T. aurea</i> | NKXS01006225.1 | 33557 | 0.40 |
| <i>T. aurea</i> | NKXS01006225.1 | 33631 | 0.40 |
| <i>T. aurea</i> | NKXS01006225.1 | 33656 | 0.40 |
| <i>T. aurea</i> | NKXS01006228.1 | 28997 | 0.40 |
| <i>T. aurea</i> | NKXS01006232.1 | 47074 | 0.40 |
| <i>T. aurea</i> | NKXS01006297.1 | 37071 | 0.40 |
| <i>T. aurea</i> | NKXS01006323.1 | 28245 | 0.40 |
| <i>T. aurea</i> | NKXS01006445.1 | 11977 | 0.40 |
| <i>T. aurea</i> | NKXS01006445.1 | 12019 | 0.40 |
| <i>T. aurea</i> | NKXS01006479.1 | 34413 | 0.40 |
| <i>T. aurea</i> | NKXS01006492.1 | 57916 | 0.40 |
| <i>T. aurea</i> | NKXS01006528.1 | 28578 | 0.40 |
| <i>T. aurea</i> | NKXS01006624.1 | 19052 | 0.40 |
| <i>T. aurea</i> | NKXS01006624.1 | 19080 | 0.40 |
| <i>T. aurea</i> | NKXS01006752.1 | 5581  | 0.40 |
| <i>T. aurea</i> | NKXS01007005.1 | 31314 | 0.40 |
| <i>T. aurea</i> | NKXS01007170.1 | 20862 | 0.40 |
| <i>T. aurea</i> | NKXS01007241.1 | 40395 | 0.40 |

|                 |                |        |      |
|-----------------|----------------|--------|------|
| <i>T. aurea</i> | NKXS01007714.1 | 6255   | 0.40 |
| <i>T. aurea</i> | NKXS01007737.1 | 11568  | 0.40 |
| <i>T. aurea</i> | NKXS01007737.1 | 11576  | 0.40 |
| <i>T. aurea</i> | NKXS01008171.1 | 9407   | 0.40 |
| <i>T. aurea</i> | NKXS01008231.1 | 11231  | 0.40 |
| <i>T. aurea</i> | NKXS01008231.1 | 11233  | 0.40 |
| <i>T. aurea</i> | NKXS01008234.1 | 3856   | 0.40 |
| <i>T. aurea</i> | NKXS01008372.1 | 9760   | 0.40 |
| <i>T. aurea</i> | NKXS01009501.1 | 914    | 0.40 |
| <i>T. aurea</i> | NKXS01012273.1 | 1190   | 0.40 |
| <i>T. aurea</i> | NKXS01000003.1 | 5893   | 0.20 |
| <i>T. aurea</i> | NKXS01000003.1 | 6112   | 0.20 |
| <i>T. aurea</i> | NKXS01000041.1 | 281477 | 0.20 |
| <i>T. aurea</i> | NKXS01000041.1 | 292607 | 0.20 |
| <i>T. aurea</i> | NKXS01000055.1 | 67524  | 0.20 |
| <i>T. aurea</i> | NKXS01000094.1 | 184735 | 0.20 |
| <i>T. aurea</i> | NKXS01000097.1 | 67749  | 0.20 |
| <i>T. aurea</i> | NKXS01000097.1 | 67758  | 0.20 |
| <i>T. aurea</i> | NKXS01000114.1 | 120028 | 0.20 |
| <i>T. aurea</i> | NKXS01000175.1 | 79553  | 0.20 |
| <i>T. aurea</i> | NKXS01000186.1 | 152957 | 0.20 |
| <i>T. aurea</i> | NKXS01000227.1 | 31346  | 0.20 |
| <i>T. aurea</i> | NKXS01000418.1 | 181349 | 0.20 |
| <i>T. aurea</i> | NKXS01000455.1 | 123548 | 0.20 |
| <i>T. aurea</i> | NKXS01000455.1 | 123552 | 0.20 |
| <i>T. aurea</i> | NKXS01000474.1 | 20377  | 0.20 |
| <i>T. aurea</i> | NKXS01000538.1 | 90019  | 0.20 |
| <i>T. aurea</i> | NKXS01000546.1 | 99118  | 0.20 |
| <i>T. aurea</i> | NKXS01000720.1 | 50419  | 0.20 |
| <i>T. aurea</i> | NKXS01000791.1 | 14524  | 0.20 |
| <i>T. aurea</i> | NKXS01000791.1 | 14545  | 0.20 |
| <i>T. aurea</i> | NKXS01000959.1 | 21889  | 0.20 |
| <i>T. aurea</i> | NKXS01000980.1 | 7050   | 0.20 |
| <i>T. aurea</i> | NKXS01001049.1 | 72310  | 0.20 |
| <i>T. aurea</i> | NKXS01001082.1 | 31364  | 0.20 |
| <i>T. aurea</i> | NKXS01001082.1 | 31479  | 0.20 |
| <i>T. aurea</i> | NKXS01001082.1 | 31512  | 0.20 |
| <i>T. aurea</i> | NKXS01001082.1 | 31537  | 0.20 |
| <i>T. aurea</i> | NKXS01001138.1 | 87086  | 0.20 |
| <i>T. aurea</i> | NKXS01001138.1 | 87103  | 0.20 |
| <i>T. aurea</i> | NKXS01001138.1 | 87104  | 0.20 |
| <i>T. aurea</i> | NKXS01001138.1 | 111950 | 0.20 |
| <i>T. aurea</i> | NKXS01001160.1 | 42770  | 0.20 |
| <i>T. aurea</i> | NKXS01001160.1 | 42871  | 0.20 |

|                 |                |        |      |
|-----------------|----------------|--------|------|
| <i>T. aurea</i> | NKXS01001160.1 | 42925  | 0.20 |
| <i>T. aurea</i> | NKXS01001425.1 | 19752  | 0.20 |
| <i>T. aurea</i> | NKXS01001680.1 | 9992   | 0.20 |
| <i>T. aurea</i> | NKXS01001680.1 | 10169  | 0.20 |
| <i>T. aurea</i> | NKXS01001740.1 | 99414  | 0.20 |
| <i>T. aurea</i> | NKXS01001777.1 | 28772  | 0.20 |
| <i>T. aurea</i> | NKXS01001859.1 | 71701  | 0.20 |
| <i>T. aurea</i> | NKXS01001920.1 | 109661 | 0.20 |
| <i>T. aurea</i> | NKXS01002008.1 | 21286  | 0.20 |
| <i>T. aurea</i> | NKXS01002008.1 | 21329  | 0.20 |
| <i>T. aurea</i> | NKXS01002017.1 | 64401  | 0.20 |
| <i>T. aurea</i> | NKXS01002019.1 | 10124  | 0.20 |
| <i>T. aurea</i> | NKXS01002019.1 | 10179  | 0.20 |
| <i>T. aurea</i> | NKXS01002019.1 | 10200  | 0.20 |
| <i>T. aurea</i> | NKXS01002126.1 | 81432  | 0.20 |
| <i>T. aurea</i> | NKXS01002148.1 | 55332  | 0.20 |
| <i>T. aurea</i> | NKXS01002276.1 | 44350  | 0.20 |
| <i>T. aurea</i> | NKXS01002391.1 | 6720   | 0.20 |
| <i>T. aurea</i> | NKXS01002633.1 | 82981  | 0.20 |
| <i>T. aurea</i> | NKXS01002633.1 | 83128  | 0.20 |
| <i>T. aurea</i> | NKXS01002661.1 | 45931  | 0.20 |
| <i>T. aurea</i> | NKXS01002716.1 | 15013  | 0.20 |
| <i>T. aurea</i> | NKXS01002730.1 | 26379  | 0.20 |
| <i>T. aurea</i> | NKXS01002730.1 | 26445  | 0.20 |
| <i>T. aurea</i> | NKXS01002730.1 | 26540  | 0.20 |
| <i>T. aurea</i> | NKXS01002749.1 | 28650  | 0.20 |
| <i>T. aurea</i> | NKXS01002749.1 | 28725  | 0.20 |
| <i>T. aurea</i> | NKXS01002761.1 | 27829  | 0.20 |
| <i>T. aurea</i> | NKXS01002785.1 | 88246  | 0.20 |
| <i>T. aurea</i> | NKXS01002854.1 | 66361  | 0.20 |
| <i>T. aurea</i> | NKXS01002981.1 | 73394  | 0.20 |
| <i>T. aurea</i> | NKXS01003091.1 | 48062  | 0.20 |
| <i>T. aurea</i> | NKXS01003243.1 | 28661  | 0.20 |
| <i>T. aurea</i> | NKXS01003418.1 | 65441  | 0.20 |
| <i>T. aurea</i> | NKXS01003418.1 | 65492  | 0.20 |
| <i>T. aurea</i> | NKXS01003568.1 | 58726  | 0.20 |
| <i>T. aurea</i> | NKXS01003568.1 | 58747  | 0.20 |
| <i>T. aurea</i> | NKXS01003568.1 | 58804  | 0.20 |
| <i>T. aurea</i> | NKXS01003568.1 | 58805  | 0.20 |
| <i>T. aurea</i> | NKXS01003568.1 | 58819  | 0.20 |
| <i>T. aurea</i> | NKXS01003568.1 | 58861  | 0.20 |
| <i>T. aurea</i> | NKXS01003568.1 | 58885  | 0.20 |
| <i>T. aurea</i> | NKXS01003617.1 | 44504  | 0.20 |
| <i>T. aurea</i> | NKXS01003667.1 | 40557  | 0.20 |

|                 |                |        |      |
|-----------------|----------------|--------|------|
| <i>T. aurea</i> | NKXS01003852.1 | 29308  | 0.20 |
| <i>T. aurea</i> | NKXS01003854.1 | 25094  | 0.20 |
| <i>T. aurea</i> | NKXS01003854.1 | 25216  | 0.20 |
| <i>T. aurea</i> | NKXS01003982.1 | 17671  | 0.20 |
| <i>T. aurea</i> | NKXS01004000.1 | 109927 | 0.20 |
| <i>T. aurea</i> | NKXS01004000.1 | 110023 | 0.20 |
| <i>T. aurea</i> | NKXS01004001.1 | 38734  | 0.20 |
| <i>T. aurea</i> | NKXS01004283.1 | 13088  | 0.20 |
| <i>T. aurea</i> | NKXS01004283.1 | 13201  | 0.20 |
| <i>T. aurea</i> | NKXS01004283.1 | 13213  | 0.20 |
| <i>T. aurea</i> | NKXS01004515.1 | 84459  | 0.20 |
| <i>T. aurea</i> | NKXS01004539.1 | 1399   | 0.20 |
| <i>T. aurea</i> | NKXS01004565.1 | 25491  | 0.20 |
| <i>T. aurea</i> | NKXS01004747.1 | 14419  | 0.20 |
| <i>T. aurea</i> | NKXS01004747.1 | 14458  | 0.20 |
| <i>T. aurea</i> | NKXS01004763.1 | 23306  | 0.20 |
| <i>T. aurea</i> | NKXS01004834.1 | 45763  | 0.20 |
| <i>T. aurea</i> | NKXS01004834.1 | 45850  | 0.20 |
| <i>T. aurea</i> | NKXS01004834.1 | 45935  | 0.20 |
| <i>T. aurea</i> | NKXS01004951.1 | 20887  | 0.20 |
| <i>T. aurea</i> | NKXS01005047.1 | 13551  | 0.20 |
| <i>T. aurea</i> | NKXS01005047.1 | 13753  | 0.20 |
| <i>T. aurea</i> | NKXS01005119.1 | 61552  | 0.20 |
| <i>T. aurea</i> | NKXS01005119.1 | 61602  | 0.20 |
| <i>T. aurea</i> | NKXS01005176.1 | 22756  | 0.20 |
| <i>T. aurea</i> | NKXS01005200.1 | 5793   | 0.20 |
| <i>T. aurea</i> | NKXS01005330.1 | 19527  | 0.20 |
| <i>T. aurea</i> | NKXS01005330.1 | 19577  | 0.20 |
| <i>T. aurea</i> | NKXS01005330.1 | 19589  | 0.20 |
| <i>T. aurea</i> | NKXS01005330.1 | 19592  | 0.20 |
| <i>T. aurea</i> | NKXS01005330.1 | 19593  | 0.20 |
| <i>T. aurea</i> | NKXS01005330.1 | 19619  | 0.20 |
| <i>T. aurea</i> | NKXS01005330.1 | 19681  | 0.20 |
| <i>T. aurea</i> | NKXS01005330.1 | 19705  | 0.20 |
| <i>T. aurea</i> | NKXS01005330.1 | 19707  | 0.20 |
| <i>T. aurea</i> | NKXS01005481.1 | 9428   | 0.20 |
| <i>T. aurea</i> | NKXS01006060.1 | 45363  | 0.20 |
| <i>T. aurea</i> | NKXS01006119.1 | 28338  | 0.20 |
| <i>T. aurea</i> | NKXS01006290.1 | 14473  | 0.20 |
| <i>T. aurea</i> | NKXS01006380.1 | 33440  | 0.20 |
| <i>T. aurea</i> | NKXS01006416.1 | 37447  | 0.20 |
| <i>T. aurea</i> | NKXS01006506.1 | 4757   | 0.20 |
| <i>T. aurea</i> | NKXS01006506.1 | 4826   | 0.20 |
| <i>T. aurea</i> | NKXS01006518.1 | 6465   | 0.20 |

|                 |                |       |      |
|-----------------|----------------|-------|------|
| <i>T. aurea</i> | NKXS01006737.1 | 24022 | 0.20 |
| <i>T. aurea</i> | NKXS01006752.1 | 5575  | 0.20 |
| <i>T. aurea</i> | NKXS01006802.1 | 3051  | 0.20 |
| <i>T. aurea</i> | NKXS01006994.1 | 9884  | 0.20 |
| <i>T. aurea</i> | NKXS01007084.1 | 24944 | 0.20 |
| <i>T. aurea</i> | NKXS01007170.1 | 20787 | 0.20 |
| <i>T. aurea</i> | NKXS01007241.1 | 40473 | 0.20 |
| <i>T. aurea</i> | NKXS01007440.1 | 17134 | 0.20 |
| <i>T. aurea</i> | NKXS01007524.1 | 4304  | 0.20 |
| <i>T. aurea</i> | NKXS01008034.1 | 13674 | 0.20 |
| <i>T. aurea</i> | NKXS01008034.1 | 13809 | 0.20 |
| <i>T. aurea</i> | NKXS01008082.1 | 22364 | 0.20 |
| <i>T. aurea</i> | NKXS01008171.1 | 9480  | 0.20 |
| <i>T. aurea</i> | NKXS01008372.1 | 9791  | 0.20 |
| <i>T. aurea</i> | NKXS01008422.1 | 17064 | 0.20 |
| <i>T. aurea</i> | NKXS01008667.1 | 4542  | 0.20 |
| <i>T. aurea</i> | NKXS01009097.1 | 825   | 0.20 |
| <i>T. aurea</i> | NKXS01009120.1 | 7037  | 0.20 |
| <i>T. aurea</i> | NKXS01009173.1 | 15459 | 0.20 |
| <i>T. aurea</i> | NKXS01009259.1 | 13671 | 0.20 |
| <i>T. aurea</i> | NKXS01009501.1 | 922   | 0.20 |
| <i>T. aurea</i> | NKXS01009501.1 | 968   | 0.20 |
| <i>T. aurea</i> | NKXS01009501.1 | 1012  | 0.20 |
| <i>T. aurea</i> | NKXS01009944.1 | 3089  | 0.20 |
| <i>T. aurea</i> | NKXS01010574.1 | 1096  | 0.20 |
| <i>T. aurea</i> | NKXS01010574.1 | 1169  | 0.20 |
| <i>T. aurea</i> | NKXS01012273.1 | 1168  | 0.20 |

---
