# Supplementary material for: Identification of Commercial Cultivars in the Tabebuia Alliance Using Genotyping-by-Sequencing
Source: MDPI journal article supplement (doi:10.3390/f14020271), 2023-01-31
Supplement: s1 [file s1]

**Table S4.** High-quality loci could be used for distinguish cultivar in *H. chrysotrichus*

| Species                 | Scaffolds      | Position | Rate of no-majority genotype |
|-------------------------|----------------|----------|------------------------------|
| <i>H. chrysotrichus</i> | NKXS01004639.1 | 12253    | 0.50                         |
| <i>H. chrysotrichus</i> | NKXS01004639.1 | 12265    | 0.50                         |
| <i>H. chrysotrichus</i> | NKXS01000468.1 | 10587    | 0.45                         |
| <i>H. chrysotrichus</i> | NKXS01002266.1 | 94860    | 0.45                         |
| <i>H. chrysotrichus</i> | NKXS01002203.1 | 65090    | 0.41                         |
| <i>H. chrysotrichus</i> | NKXS01008197.1 | 13623    | 0.36                         |
| <i>H. chrysotrichus</i> | NKXS01001288.1 | 26001    | 0.32                         |
| <i>H. chrysotrichus</i> | NKXS01000132.1 | 140446   | 0.27                         |
| <i>H. chrysotrichus</i> | NKXS01000218.1 | 148766   | 0.23                         |
| <i>H. chrysotrichus</i> | NKXS01000382.1 | 151744   | 0.23                         |
| <i>H. chrysotrichus</i> | NKXS01001445.1 | 155272   | 0.23                         |
| <i>H. chrysotrichus</i> | NKXS01000152.1 | 99682    | 0.18                         |
| <i>H. chrysotrichus</i> | NKXS01002263.1 | 88194    | 0.18                         |
| <i>H. chrysotrichus</i> | NKXS01002389.1 | 6951     | 0.18                         |
| <i>H. chrysotrichus</i> | NKXS01002772.1 | 53933    | 0.18                         |
| <i>H. chrysotrichus</i> | NKXS01000003.1 | 5893     | 0.14                         |
| <i>H. chrysotrichus</i> | NKXS01000003.1 | 5951     | 0.14                         |
| <i>H. chrysotrichus</i> | NKXS01000003.1 | 6112     | 0.14                         |
| <i>H. chrysotrichus</i> | NKXS01000003.1 | 6142     | 0.14                         |
| <i>H. chrysotrichus</i> | NKXS01000172.1 | 90582    | 0.14                         |
| <i>H. chrysotrichus</i> | NKXS01000311.1 | 73721    | 0.14                         |
| <i>H. chrysotrichus</i> | NKXS01000657.1 | 4780     | 0.14                         |
| <i>H. chrysotrichus</i> | NKXS01000657.1 | 5029     | 0.14                         |
| <i>H. chrysotrichus</i> | NKXS01001097.1 | 147280   | 0.14                         |
| <i>H. chrysotrichus</i> | NKXS01001444.1 | 118958   | 0.14                         |
| <i>H. chrysotrichus</i> | NKXS01001908.1 | 34934    | 0.14                         |
| <i>H. chrysotrichus</i> | NKXS01002103.1 | 4437     | 0.14                         |
| <i>H. chrysotrichus</i> | NKXS01002112.1 | 23160    | 0.14                         |
| <i>H. chrysotrichus</i> | NKXS01003821.1 | 81127    | 0.14                         |
| <i>H. chrysotrichus</i> | NKXS01004611.1 | 65662    | 0.14                         |
| <i>H. chrysotrichus</i> | NKXS01005213.1 | 31385    | 0.14                         |
| <i>H. chrysotrichus</i> | NKXS01008372.1 | 9580     | 0.14                         |
| <i>H. chrysotrichus</i> | NKXS01008372.1 | 9603     | 0.14                         |
| <i>H. chrysotrichus</i> | NKXS01008372.1 | 9650     | 0.14                         |
| <i>H. chrysotrichus</i> | NKXS01008372.1 | 9662     | 0.14                         |
| <i>H. chrysotrichus</i> | NKXS01008372.1 | 9767     | 0.14                         |
| <i>H. chrysotrichus</i> | NKXS01000050.1 | 217587   | 0.09                         |
| <i>H. chrysotrichus</i> | NKXS01000151.1 | 302910   | 0.09                         |
| <i>H. chrysotrichus</i> | NKXS01000151.1 | 302913   | 0.09                         |
| <i>H. chrysotrichus</i> | NKXS01000151.1 | 302917   | 0.09                         |
| <i>H. chrysotrichus</i> | NKXS01000151.1 | 302927   | 0.09                         |

|                         |                |        |      |
|-------------------------|----------------|--------|------|
| <i>H. chrysotrichus</i> | NKXS01000151.1 | 302931 | 0.09 |
| <i>H. chrysotrichus</i> | NKXS01000151.1 | 302961 | 0.09 |
| <i>H. chrysotrichus</i> | NKXS01000151.1 | 303040 | 0.09 |
| <i>H. chrysotrichus</i> | NKXS01000171.1 | 50946  | 0.09 |
| <i>H. chrysotrichus</i> | NKXS01000171.1 | 50960  | 0.09 |
| <i>H. chrysotrichus</i> | NKXS01000171.1 | 50995  | 0.09 |
| <i>H. chrysotrichus</i> | NKXS01000321.1 | 131800 | 0.09 |
| <i>H. chrysotrichus</i> | NKXS01000515.1 | 150357 | 0.09 |
| <i>H. chrysotrichus</i> | NKXS01000653.1 | 1173   | 0.09 |
| <i>H. chrysotrichus</i> | NKXS01000718.1 | 78094  | 0.09 |
| <i>H. chrysotrichus</i> | NKXS01000824.1 | 22983  | 0.09 |
| <i>H. chrysotrichus</i> | NKXS01000871.1 | 93549  | 0.09 |
| <i>H. chrysotrichus</i> | NKXS01001085.1 | 39303  | 0.09 |
| <i>H. chrysotrichus</i> | NKXS01001085.1 | 39455  | 0.09 |
| <i>H. chrysotrichus</i> | NKXS01001265.1 | 125914 | 0.09 |
| <i>H. chrysotrichus</i> | NKXS01001311.1 | 42497  | 0.09 |
| <i>H. chrysotrichus</i> | NKXS01001311.1 | 42506  | 0.09 |
| <i>H. chrysotrichus</i> | NKXS01001329.1 | 96174  | 0.09 |
| <i>H. chrysotrichus</i> | NKXS01001329.1 | 96210  | 0.09 |
| <i>H. chrysotrichus</i> | NKXS01001329.1 | 96402  | 0.09 |
| <i>H. chrysotrichus</i> | NKXS01001456.1 | 21334  | 0.09 |
| <i>H. chrysotrichus</i> | NKXS01001456.1 | 21354  | 0.09 |
| <i>H. chrysotrichus</i> | NKXS01001668.1 | 27136  | 0.09 |
| <i>H. chrysotrichus</i> | NKXS01001760.1 | 40041  | 0.09 |
| <i>H. chrysotrichus</i> | NKXS01002052.1 | 119819 | 0.09 |
| <i>H. chrysotrichus</i> | NKXS01002052.1 | 134961 | 0.09 |
| <i>H. chrysotrichus</i> | NKXS01002052.1 | 135026 | 0.09 |
| <i>H. chrysotrichus</i> | NKXS01002203.1 | 65069  | 0.09 |
| <i>H. chrysotrichus</i> | NKXS01002213.1 | 35357  | 0.09 |
| <i>H. chrysotrichus</i> | NKXS01002401.1 | 56594  | 0.09 |
| <i>H. chrysotrichus</i> | NKXS01002578.1 | 14359  | 0.09 |
| <i>H. chrysotrichus</i> | NKXS01002578.1 | 14394  | 0.09 |
| <i>H. chrysotrichus</i> | NKXS01002604.1 | 50199  | 0.09 |
| <i>H. chrysotrichus</i> | NKXS01002718.1 | 2529   | 0.09 |
| <i>H. chrysotrichus</i> | NKXS01002718.1 | 2596   | 0.09 |
| <i>H. chrysotrichus</i> | NKXS01003075.1 | 80655  | 0.09 |
| <i>H. chrysotrichus</i> | NKXS01003075.1 | 80778  | 0.09 |
| <i>H. chrysotrichus</i> | NKXS01003485.1 | 18562  | 0.09 |
| <i>H. chrysotrichus</i> | NKXS01003502.1 | 72203  | 0.09 |
| <i>H. chrysotrichus</i> | NKXS01003502.1 | 72243  | 0.09 |
| <i>H. chrysotrichus</i> | NKXS01003645.1 | 11894  | 0.09 |
| <i>H. chrysotrichus</i> | NKXS01003783.1 | 36134  | 0.09 |
| <i>H. chrysotrichus</i> | NKXS01003816.1 | 26043  | 0.09 |
| <i>H. chrysotrichus</i> | NKXS01003823.1 | 44698  | 0.09 |

|                         |                |        |      |
|-------------------------|----------------|--------|------|
| <i>H. chrysotrichus</i> | NKXS01003918.1 | 136674 | 0.09 |
| <i>H. chrysotrichus</i> | NKXS01004271.1 | 72576  | 0.09 |
| <i>H. chrysotrichus</i> | NKXS01004448.1 | 16759  | 0.09 |
| <i>H. chrysotrichus</i> | NKXS01004485.1 | 30307  | 0.09 |
| <i>H. chrysotrichus</i> | NKXS01005069.1 | 17609  | 0.09 |
| <i>H. chrysotrichus</i> | NKXS01005069.1 | 17611  | 0.09 |
| <i>H. chrysotrichus</i> | NKXS01005069.1 | 17682  | 0.09 |
| <i>H. chrysotrichus</i> | NKXS01005789.1 | 10688  | 0.09 |
| <i>H. chrysotrichus</i> | NKXS01006095.1 | 22834  | 0.09 |
| <i>H. chrysotrichus</i> | NKXS01006095.1 | 22878  | 0.09 |
| <i>H. chrysotrichus</i> | NKXS01006364.1 | 20178  | 0.09 |
| <i>H. chrysotrichus</i> | NKXS01006364.1 | 20224  | 0.09 |
| <i>H. chrysotrichus</i> | NKXS01006417.1 | 32069  | 0.09 |
| <i>H. chrysotrichus</i> | NKXS01006417.1 | 32094  | 0.09 |
| <i>H. chrysotrichus</i> | NKXS01006490.1 | 30398  | 0.09 |
| <i>H. chrysotrichus</i> | NKXS01006679.1 | 1731   | 0.09 |
| <i>H. chrysotrichus</i> | NKXS01006708.1 | 1163   | 0.09 |
| <i>H. chrysotrichus</i> | NKXS01007041.1 | 22559  | 0.09 |
| <i>H. chrysotrichus</i> | NKXS01007170.1 | 20648  | 0.09 |
| <i>H. chrysotrichus</i> | NKXS01007210.1 | 23674  | 0.09 |
| <i>H. chrysotrichus</i> | NKXS01007210.1 | 23692  | 0.09 |
| <i>H. chrysotrichus</i> | NKXS01007541.1 | 5698   | 0.09 |
| <i>H. chrysotrichus</i> | NKXS01007657.1 | 3547   | 0.09 |
| <i>H. chrysotrichus</i> | NKXS01007985.1 | 6852   | 0.09 |
| <i>H. chrysotrichus</i> | NKXS01007985.1 | 6936   | 0.09 |
| <i>H. chrysotrichus</i> | NKXS01007985.1 | 6963   | 0.09 |
| <i>H. chrysotrichus</i> | NKXS01007985.1 | 6999   | 0.09 |
| <i>H. chrysotrichus</i> | NKXS01007985.1 | 7002   | 0.09 |
| <i>H. chrysotrichus</i> | NKXS01000008.1 | 106668 | 0.05 |
| <i>H. chrysotrichus</i> | NKXS01000008.1 | 106729 | 0.05 |
| <i>H. chrysotrichus</i> | NKXS01000008.1 | 106754 | 0.05 |
| <i>H. chrysotrichus</i> | NKXS01000008.1 | 106756 | 0.05 |
| <i>H. chrysotrichus</i> | NKXS01000017.1 | 192034 | 0.05 |
| <i>H. chrysotrichus</i> | NKXS01000017.1 | 192092 | 0.05 |
| <i>H. chrysotrichus</i> | NKXS01000051.1 | 247114 | 0.05 |
| <i>H. chrysotrichus</i> | NKXS01000062.1 | 248984 | 0.05 |
| <i>H. chrysotrichus</i> | NKXS01000071.1 | 31419  | 0.05 |
| <i>H. chrysotrichus</i> | NKXS01000071.1 | 31654  | 0.05 |
| <i>H. chrysotrichus</i> | NKXS01000083.1 | 45374  | 0.05 |
| <i>H. chrysotrichus</i> | NKXS01000117.1 | 57920  | 0.05 |
| <i>H. chrysotrichus</i> | NKXS01000309.1 | 186923 | 0.05 |
| <i>H. chrysotrichus</i> | NKXS01000309.1 | 187123 | 0.05 |
| <i>H. chrysotrichus</i> | NKXS01000327.1 | 63415  | 0.05 |
| <i>H. chrysotrichus</i> | NKXS01000359.1 | 195317 | 0.05 |

|                         |                |        |      |
|-------------------------|----------------|--------|------|
| <i>H. chrysotrichus</i> | NKXS01000359.1 | 196201 | 0.05 |
| <i>H. chrysotrichus</i> | NKXS01000385.1 | 42618  | 0.05 |
| <i>H. chrysotrichus</i> | NKXS01000419.1 | 156094 | 0.05 |
| <i>H. chrysotrichus</i> | NKXS01000419.1 | 156298 | 0.05 |
| <i>H. chrysotrichus</i> | NKXS01000419.1 | 156438 | 0.05 |
| <i>H. chrysotrichus</i> | NKXS01000419.1 | 156467 | 0.05 |
| <i>H. chrysotrichus</i> | NKXS01000419.1 | 156494 | 0.05 |
| <i>H. chrysotrichus</i> | NKXS01000419.1 | 156499 | 0.05 |
| <i>H. chrysotrichus</i> | NKXS01000422.1 | 50385  | 0.05 |
| <i>H. chrysotrichus</i> | NKXS01000505.1 | 113881 | 0.05 |
| <i>H. chrysotrichus</i> | NKXS01000556.1 | 160207 | 0.05 |
| <i>H. chrysotrichus</i> | NKXS01000600.1 | 249735 | 0.05 |
| <i>H. chrysotrichus</i> | NKXS01000603.1 | 79200  | 0.05 |
| <i>H. chrysotrichus</i> | NKXS01000631.1 | 59723  | 0.05 |
| <i>H. chrysotrichus</i> | NKXS01000644.1 | 144703 | 0.05 |
| <i>H. chrysotrichus</i> | NKXS01000676.1 | 8946   | 0.05 |
| <i>H. chrysotrichus</i> | NKXS01000676.1 | 8978   | 0.05 |
| <i>H. chrysotrichus</i> | NKXS01000676.1 | 8990   | 0.05 |
| <i>H. chrysotrichus</i> | NKXS01000676.1 | 9055   | 0.05 |
| <i>H. chrysotrichus</i> | NKXS01000688.1 | 51547  | 0.05 |
| <i>H. chrysotrichus</i> | NKXS01000688.1 | 51616  | 0.05 |
| <i>H. chrysotrichus</i> | NKXS01000702.1 | 66392  | 0.05 |
| <i>H. chrysotrichus</i> | NKXS01000733.1 | 90910  | 0.05 |
| <i>H. chrysotrichus</i> | NKXS01000822.1 | 63567  | 0.05 |
| <i>H. chrysotrichus</i> | NKXS01000863.1 | 127436 | 0.05 |
| <i>H. chrysotrichus</i> | NKXS01000880.1 | 16630  | 0.05 |
| <i>H. chrysotrichus</i> | NKXS01000880.1 | 16819  | 0.05 |
| <i>H. chrysotrichus</i> | NKXS01000880.1 | 16848  | 0.05 |
| <i>H. chrysotrichus</i> | NKXS01000880.1 | 16861  | 0.05 |
| <i>H. chrysotrichus</i> | NKXS01000911.1 | 113535 | 0.05 |
| <i>H. chrysotrichus</i> | NKXS01000927.1 | 91159  | 0.05 |
| <i>H. chrysotrichus</i> | NKXS01000959.1 | 21910  | 0.05 |
| <i>H. chrysotrichus</i> | NKXS01000960.1 | 20385  | 0.05 |
| <i>H. chrysotrichus</i> | NKXS01000960.1 | 40894  | 0.05 |
| <i>H. chrysotrichus</i> | NKXS01001013.1 | 49378  | 0.05 |
| <i>H. chrysotrichus</i> | NKXS01001013.1 | 49483  | 0.05 |
| <i>H. chrysotrichus</i> | NKXS01001050.1 | 69752  | 0.05 |
| <i>H. chrysotrichus</i> | NKXS01001144.1 | 2699   | 0.05 |
| <i>H. chrysotrichus</i> | NKXS01001180.1 | 23243  | 0.05 |
| <i>H. chrysotrichus</i> | NKXS01001246.1 | 12482  | 0.05 |
| <i>H. chrysotrichus</i> | NKXS01001329.1 | 96192  | 0.05 |
| <i>H. chrysotrichus</i> | NKXS01001369.1 | 17789  | 0.05 |
| <i>H. chrysotrichus</i> | NKXS01001524.1 | 76573  | 0.05 |
| <i>H. chrysotrichus</i> | NKXS01001545.1 | 38353  | 0.05 |

|                         |                |        |      |
|-------------------------|----------------|--------|------|
| <i>H. chrysotrichus</i> | NKXS01001558.1 | 112850 | 0.05 |
| <i>H. chrysotrichus</i> | NKXS01001577.1 | 33872  | 0.05 |
| <i>H. chrysotrichus</i> | NKXS01001642.1 | 76062  | 0.05 |
| <i>H. chrysotrichus</i> | NKXS01001647.1 | 29419  | 0.05 |
| <i>H. chrysotrichus</i> | NKXS01001652.1 | 20683  | 0.05 |
| <i>H. chrysotrichus</i> | NKXS01001663.1 | 29398  | 0.05 |
| <i>H. chrysotrichus</i> | NKXS01001687.1 | 70988  | 0.05 |
| <i>H. chrysotrichus</i> | NKXS01001697.1 | 95267  | 0.05 |
| <i>H. chrysotrichus</i> | NKXS01001697.1 | 95291  | 0.05 |
| <i>H. chrysotrichus</i> | NKXS01001697.1 | 95308  | 0.05 |
| <i>H. chrysotrichus</i> | NKXS01001697.1 | 95313  | 0.05 |
| <i>H. chrysotrichus</i> | NKXS01001697.1 | 95429  | 0.05 |
| <i>H. chrysotrichus</i> | NKXS01001710.1 | 10233  | 0.05 |
| <i>H. chrysotrichus</i> | NKXS01001731.1 | 28085  | 0.05 |
| <i>H. chrysotrichus</i> | NKXS01001773.1 | 48152  | 0.05 |
| <i>H. chrysotrichus</i> | NKXS01001856.1 | 81607  | 0.05 |
| <i>H. chrysotrichus</i> | NKXS01002021.1 | 21238  | 0.05 |
| <i>H. chrysotrichus</i> | NKXS01002101.1 | 48675  | 0.05 |
| <i>H. chrysotrichus</i> | NKXS01002112.1 | 23025  | 0.05 |
| <i>H. chrysotrichus</i> | NKXS01002112.1 | 23049  | 0.05 |
| <i>H. chrysotrichus</i> | NKXS01002112.1 | 23151  | 0.05 |
| <i>H. chrysotrichus</i> | NKXS01002117.1 | 50929  | 0.05 |
| <i>H. chrysotrichus</i> | NKXS01002117.1 | 50993  | 0.05 |
| <i>H. chrysotrichus</i> | NKXS01002117.1 | 51047  | 0.05 |
| <i>H. chrysotrichus</i> | NKXS01002117.1 | 51155  | 0.05 |
| <i>H. chrysotrichus</i> | NKXS01002166.1 | 77435  | 0.05 |
| <i>H. chrysotrichus</i> | NKXS01002171.1 | 41577  | 0.05 |
| <i>H. chrysotrichus</i> | NKXS01002178.1 | 5316   | 0.05 |
| <i>H. chrysotrichus</i> | NKXS01002178.1 | 5348   | 0.05 |
| <i>H. chrysotrichus</i> | NKXS01002178.1 | 5360   | 0.05 |
| <i>H. chrysotrichus</i> | NKXS01002178.1 | 5440   | 0.05 |
| <i>H. chrysotrichus</i> | NKXS01002242.1 | 5751   | 0.05 |
| <i>H. chrysotrichus</i> | NKXS01002242.1 | 5914   | 0.05 |
| <i>H. chrysotrichus</i> | NKXS01002301.1 | 14605  | 0.05 |
| <i>H. chrysotrichus</i> | NKXS01002326.1 | 22043  | 0.05 |
| <i>H. chrysotrichus</i> | NKXS01002389.1 | 7064   | 0.05 |
| <i>H. chrysotrichus</i> | NKXS01002389.1 | 7076   | 0.05 |
| <i>H. chrysotrichus</i> | NKXS01002389.1 | 7113   | 0.05 |
| <i>H. chrysotrichus</i> | NKXS01002404.1 | 11300  | 0.05 |
| <i>H. chrysotrichus</i> | NKXS01002500.1 | 62420  | 0.05 |
| <i>H. chrysotrichus</i> | NKXS01002500.1 | 62494  | 0.05 |
| <i>H. chrysotrichus</i> | NKXS01002500.1 | 62621  | 0.05 |
| <i>H. chrysotrichus</i> | NKXS01002500.1 | 62635  | 0.05 |
| <i>H. chrysotrichus</i> | NKXS01002626.1 | 31758  | 0.05 |

|                         |                |        |      |
|-------------------------|----------------|--------|------|
| <i>H. chrysotrichus</i> | NKXS01002626.1 | 37855  | 0.05 |
| <i>H. chrysotrichus</i> | NKXS01002706.1 | 40217  | 0.05 |
| <i>H. chrysotrichus</i> | NKXS01002706.1 | 82267  | 0.05 |
| <i>H. chrysotrichus</i> | NKXS01002717.1 | 2792   | 0.05 |
| <i>H. chrysotrichus</i> | NKXS01002718.1 | 2495   | 0.05 |
| <i>H. chrysotrichus</i> | NKXS01002718.1 | 2524   | 0.05 |
| <i>H. chrysotrichus</i> | NKXS01002718.1 | 2601   | 0.05 |
| <i>H. chrysotrichus</i> | NKXS01002718.1 | 2608   | 0.05 |
| <i>H. chrysotrichus</i> | NKXS01002726.1 | 16260  | 0.05 |
| <i>H. chrysotrichus</i> | NKXS01002733.1 | 40771  | 0.05 |
| <i>H. chrysotrichus</i> | NKXS01002745.1 | 33531  | 0.05 |
| <i>H. chrysotrichus</i> | NKXS01002762.1 | 650    | 0.05 |
| <i>H. chrysotrichus</i> | NKXS01002762.1 | 653    | 0.05 |
| <i>H. chrysotrichus</i> | NKXS01002788.1 | 27267  | 0.05 |
| <i>H. chrysotrichus</i> | NKXS01002823.1 | 12181  | 0.05 |
| <i>H. chrysotrichus</i> | NKXS01002852.1 | 29329  | 0.05 |
| <i>H. chrysotrichus</i> | NKXS01002873.1 | 83892  | 0.05 |
| <i>H. chrysotrichus</i> | NKXS01002927.1 | 54929  | 0.05 |
| <i>H. chrysotrichus</i> | NKXS01002942.1 | 33443  | 0.05 |
| <i>H. chrysotrichus</i> | NKXS01003006.1 | 24816  | 0.05 |
| <i>H. chrysotrichus</i> | NKXS01003019.1 | 41936  | 0.05 |
| <i>H. chrysotrichus</i> | NKXS01003078.1 | 16341  | 0.05 |
| <i>H. chrysotrichus</i> | NKXS01003153.1 | 101607 | 0.05 |
| <i>H. chrysotrichus</i> | NKXS01003194.1 | 78735  | 0.05 |
| <i>H. chrysotrichus</i> | NKXS01003221.1 | 48022  | 0.05 |
| <i>H. chrysotrichus</i> | NKXS01003233.1 | 9497   | 0.05 |
| <i>H. chrysotrichus</i> | NKXS01003260.1 | 11348  | 0.05 |
| <i>H. chrysotrichus</i> | NKXS01003423.1 | 5609   | 0.05 |
| <i>H. chrysotrichus</i> | NKXS01003502.1 | 72316  | 0.05 |
| <i>H. chrysotrichus</i> | NKXS01003502.1 | 72325  | 0.05 |
| <i>H. chrysotrichus</i> | NKXS01003502.1 | 72345  | 0.05 |
| <i>H. chrysotrichus</i> | NKXS01003507.1 | 41077  | 0.05 |
| <i>H. chrysotrichus</i> | NKXS01003576.1 | 35462  | 0.05 |
| <i>H. chrysotrichus</i> | NKXS01003576.1 | 35492  | 0.05 |
| <i>H. chrysotrichus</i> | NKXS01003578.1 | 54115  | 0.05 |
| <i>H. chrysotrichus</i> | NKXS01003719.1 | 67417  | 0.05 |
| <i>H. chrysotrichus</i> | NKXS01003821.1 | 81136  | 0.05 |
| <i>H. chrysotrichus</i> | NKXS01003821.1 | 81233  | 0.05 |
| <i>H. chrysotrichus</i> | NKXS01003823.1 | 44683  | 0.05 |
| <i>H. chrysotrichus</i> | NKXS01003823.1 | 44809  | 0.05 |
| <i>H. chrysotrichus</i> | NKXS01003823.1 | 44813  | 0.05 |
| <i>H. chrysotrichus</i> | NKXS01003846.1 | 67204  | 0.05 |
| <i>H. chrysotrichus</i> | NKXS01003852.1 | 29110  | 0.05 |
| <i>H. chrysotrichus</i> | NKXS01004071.1 | 16300  | 0.05 |

|                         |                |       |      |
|-------------------------|----------------|-------|------|
| <i>H. chrysotrichus</i> | NKXS01004071.1 | 16355 | 0.05 |
| <i>H. chrysotrichus</i> | NKXS01004154.1 | 17230 | 0.05 |
| <i>H. chrysotrichus</i> | NKXS01004184.1 | 70175 | 0.05 |
| <i>H. chrysotrichus</i> | NKXS01004184.1 | 70287 | 0.05 |
| <i>H. chrysotrichus</i> | NKXS01004217.1 | 12958 | 0.05 |
| <i>H. chrysotrichus</i> | NKXS01004379.1 | 63043 | 0.05 |
| <i>H. chrysotrichus</i> | NKXS01004381.1 | 56595 | 0.05 |
| <i>H. chrysotrichus</i> | NKXS01004381.1 | 56605 | 0.05 |
| <i>H. chrysotrichus</i> | NKXS01004381.1 | 56658 | 0.05 |
| <i>H. chrysotrichus</i> | NKXS01004394.1 | 40671 | 0.05 |
| <i>H. chrysotrichus</i> | NKXS01004413.1 | 52694 | 0.05 |
| <i>H. chrysotrichus</i> | NKXS01004448.1 | 16703 | 0.05 |
| <i>H. chrysotrichus</i> | NKXS01004448.1 | 16752 | 0.05 |
| <i>H. chrysotrichus</i> | NKXS01004448.1 | 16806 | 0.05 |
| <i>H. chrysotrichus</i> | NKXS01004473.1 | 7268  | 0.05 |
| <i>H. chrysotrichus</i> | NKXS01004523.1 | 40085 | 0.05 |
| <i>H. chrysotrichus</i> | NKXS01004535.1 | 13441 | 0.05 |
| <i>H. chrysotrichus</i> | NKXS01004554.1 | 11754 | 0.05 |
| <i>H. chrysotrichus</i> | NKXS01004707.1 | 17082 | 0.05 |
| <i>H. chrysotrichus</i> | NKXS01004707.1 | 17117 | 0.05 |
| <i>H. chrysotrichus</i> | NKXS01004763.1 | 41173 | 0.05 |
| <i>H. chrysotrichus</i> | NKXS01004849.1 | 8421  | 0.05 |
| <i>H. chrysotrichus</i> | NKXS01004895.1 | 52798 | 0.05 |
| <i>H. chrysotrichus</i> | NKXS01004895.1 | 52819 | 0.05 |
| <i>H. chrysotrichus</i> | NKXS01005165.1 | 33481 | 0.05 |
| <i>H. chrysotrichus</i> | NKXS01005176.1 | 22660 | 0.05 |
| <i>H. chrysotrichus</i> | NKXS01005176.1 | 22719 | 0.05 |
| <i>H. chrysotrichus</i> | NKXS01005218.1 | 41446 | 0.05 |
| <i>H. chrysotrichus</i> | NKXS01005218.1 | 41626 | 0.05 |
| <i>H. chrysotrichus</i> | NKXS01005312.1 | 11755 | 0.05 |
| <i>H. chrysotrichus</i> | NKXS01005312.1 | 11773 | 0.05 |
| <i>H. chrysotrichus</i> | NKXS01005358.1 | 29008 | 0.05 |
| <i>H. chrysotrichus</i> | NKXS01005368.1 | 1310  | 0.05 |
| <i>H. chrysotrichus</i> | NKXS01005576.1 | 27450 | 0.05 |
| <i>H. chrysotrichus</i> | NKXS01005595.1 | 20402 | 0.05 |
| <i>H. chrysotrichus</i> | NKXS01005680.1 | 3168  | 0.05 |
| <i>H. chrysotrichus</i> | NKXS01005684.1 | 10512 | 0.05 |
| <i>H. chrysotrichus</i> | NKXS01005690.1 | 6476  | 0.05 |
| <i>H. chrysotrichus</i> | NKXS01005725.1 | 43285 | 0.05 |
| <i>H. chrysotrichus</i> | NKXS01005789.1 | 10564 | 0.05 |
| <i>H. chrysotrichus</i> | NKXS01005789.1 | 10625 | 0.05 |
| <i>H. chrysotrichus</i> | NKXS01005789.1 | 10640 | 0.05 |
| <i>H. chrysotrichus</i> | NKXS01005789.1 | 10643 | 0.05 |
| <i>H. chrysotrichus</i> | NKXS01005789.1 | 10651 | 0.05 |

|                         |                |       |      |
|-------------------------|----------------|-------|------|
| <i>H. chrysotrichus</i> | NKXS01005789.1 | 10657 | 0.05 |
| <i>H. chrysotrichus</i> | NKXS01005789.1 | 10669 | 0.05 |
| <i>H. chrysotrichus</i> | NKXS01005789.1 | 10680 | 0.05 |
| <i>H. chrysotrichus</i> | NKXS01005789.1 | 10684 | 0.05 |
| <i>H. chrysotrichus</i> | NKXS01005789.1 | 10803 | 0.05 |
| <i>H. chrysotrichus</i> | NKXS01005789.1 | 23618 | 0.05 |
| <i>H. chrysotrichus</i> | NKXS01005984.1 | 11854 | 0.05 |
| <i>H. chrysotrichus</i> | NKXS01005985.1 | 22913 | 0.05 |
| <i>H. chrysotrichus</i> | NKXS01006011.1 | 42971 | 0.05 |
| <i>H. chrysotrichus</i> | NKXS01006038.1 | 24297 | 0.05 |
| <i>H. chrysotrichus</i> | NKXS01006145.1 | 31683 | 0.05 |
| <i>H. chrysotrichus</i> | NKXS01006145.1 | 31884 | 0.05 |
| <i>H. chrysotrichus</i> | NKXS01006164.1 | 11186 | 0.05 |
| <i>H. chrysotrichus</i> | NKXS01006277.1 | 5622  | 0.05 |
| <i>H. chrysotrichus</i> | NKXS01006289.1 | 3220  | 0.05 |
| <i>H. chrysotrichus</i> | NKXS01006303.1 | 23016 | 0.05 |
| <i>H. chrysotrichus</i> | NKXS01006306.1 | 24903 | 0.05 |
| <i>H. chrysotrichus</i> | NKXS01006441.1 | 22851 | 0.05 |
| <i>H. chrysotrichus</i> | NKXS01006506.1 | 4771  | 0.05 |
| <i>H. chrysotrichus</i> | NKXS01006522.1 | 15049 | 0.05 |
| <i>H. chrysotrichus</i> | NKXS01006522.1 | 15068 | 0.05 |
| <i>H. chrysotrichus</i> | NKXS01006554.1 | 15152 | 0.05 |
| <i>H. chrysotrichus</i> | NKXS01006625.1 | 691   | 0.05 |
| <i>H. chrysotrichus</i> | NKXS01006625.1 | 855   | 0.05 |
| <i>H. chrysotrichus</i> | NKXS01006843.1 | 629   | 0.05 |
| <i>H. chrysotrichus</i> | NKXS01006946.1 | 24607 | 0.05 |
| <i>H. chrysotrichus</i> | NKXS01007084.1 | 24941 | 0.05 |
| <i>H. chrysotrichus</i> | NKXS01007084.1 | 24944 | 0.05 |
| <i>H. chrysotrichus</i> | NKXS01007334.1 | 15652 | 0.05 |
| <i>H. chrysotrichus</i> | NKXS01007334.1 | 15680 | 0.05 |
| <i>H. chrysotrichus</i> | NKXS01007334.1 | 15699 | 0.05 |
| <i>H. chrysotrichus</i> | NKXS01007334.1 | 15810 | 0.05 |
| <i>H. chrysotrichus</i> | NKXS01007364.1 | 5464  | 0.05 |
| <i>H. chrysotrichus</i> | NKXS01007365.1 | 4221  | 0.05 |
| <i>H. chrysotrichus</i> | NKXS01007365.1 | 4402  | 0.05 |
| <i>H. chrysotrichus</i> | NKXS01007405.1 | 25441 | 0.05 |
| <i>H. chrysotrichus</i> | NKXS01007667.1 | 13932 | 0.05 |
| <i>H. chrysotrichus</i> | NKXS01007688.1 | 2301  | 0.05 |
| <i>H. chrysotrichus</i> | NKXS01007762.1 | 8850  | 0.05 |
| <i>H. chrysotrichus</i> | NKXS01007762.1 | 8894  | 0.05 |
| <i>H. chrysotrichus</i> | NKXS01007762.1 | 8899  | 0.05 |
| <i>H. chrysotrichus</i> | NKXS01007762.1 | 8947  | 0.05 |
| <i>H. chrysotrichus</i> | NKXS01007762.1 | 8974  | 0.05 |
| <i>H. chrysotrichus</i> | NKXS01007762.1 | 9001  | 0.05 |



|                         |                |       |      |
|-------------------------|----------------|-------|------|
| <i>H. chrysotrichus</i> | NKXS01007762.1 | 9071  | 0.05 |
| <i>H. chrysotrichus</i> | NKXS01007762.1 | 9076  | 0.05 |
| <i>H. chrysotrichus</i> | NKXS01007933.1 | 20387 | 0.05 |
| <i>H. chrysotrichus</i> | NKXS01008232.1 | 17632 | 0.05 |
| <i>H. chrysotrichus</i> | NKXS01008472.1 | 28507 | 0.05 |
| <i>H. chrysotrichus</i> | NKXS01008472.1 | 28570 | 0.05 |
| <i>H. chrysotrichus</i> | NKXS01008789.1 | 167   | 0.05 |
| <i>H. chrysotrichus</i> | NKXS01008860.1 | 11126 | 0.05 |
| <i>H. chrysotrichus</i> | NKXS01009549.1 | 406   | 0.05 |
| <i>H. chrysotrichus</i> | NKXS01010569.1 | 4654  | 0.05 |

---
