# Supplementary material for: Identification of Commercial Cultivars in the Tabebuia Alliance Using Genotyping-by-Sequencing
Source: MDPI journal article supplement (doi:10.3390/f14020271), 2023-01-31
Supplement: s1 [file s1]

**Table S8.** High-quality loci could be used for distinguish cultivar in *T. rosea*

| Species         | Scaffolds      | Position | Rate of no-majority genotype |
|-----------------|----------------|----------|------------------------------|
| <i>T. rosea</i> | NKXS01000062.1 | 41914    | 0.67                         |
| <i>T. rosea</i> | NKXS01000324.1 | 31109    | 0.67                         |
| <i>T. rosea</i> | NKXS01001059.1 | 139702   | 0.67                         |
| <i>T. rosea</i> | NKXS01001710.1 | 35952    | 0.67                         |
| <i>T. rosea</i> | NKXS01001860.1 | 53901    | 0.67                         |
| <i>T. rosea</i> | NKXS01002460.1 | 28902    | 0.67                         |
| <i>T. rosea</i> | NKXS01004394.1 | 40640    | 0.67                         |
| <i>T. rosea</i> | NKXS01000014.1 | 495995   | 0.56                         |
| <i>T. rosea</i> | NKXS01000062.1 | 41951    | 0.56                         |
| <i>T. rosea</i> | NKXS01000662.1 | 95891    | 0.56                         |
| <i>T. rosea</i> | NKXS01000954.1 | 16683    | 0.56                         |
| <i>T. rosea</i> | NKXS01001134.1 | 14614    | 0.56                         |
| <i>T. rosea</i> | NKXS01001282.1 | 54142    | 0.56                         |
| <i>T. rosea</i> | NKXS01001425.1 | 19551    | 0.56                         |
| <i>T. rosea</i> | NKXS01001495.1 | 108648   | 0.56                         |
| <i>T. rosea</i> | NKXS01001642.1 | 76369    | 0.56                         |
| <i>T. rosea</i> | NKXS01001680.1 | 10011    | 0.56                         |
| <i>T. rosea</i> | NKXS01001708.1 | 5420     | 0.56                         |
| <i>T. rosea</i> | NKXS01001708.1 | 9520     | 0.56                         |
| <i>T. rosea</i> | NKXS01001783.1 | 38657    | 0.56                         |
| <i>T. rosea</i> | NKXS01001851.1 | 1624     | 0.56                         |
| <i>T. rosea</i> | NKXS01001851.1 | 1650     | 0.56                         |
| <i>T. rosea</i> | NKXS01001851.1 | 1855     | 0.56                         |
| <i>T. rosea</i> | NKXS01001857.1 | 31258    | 0.56                         |
| <i>T. rosea</i> | NKXS01002067.1 | 21926    | 0.56                         |
| <i>T. rosea</i> | NKXS01002382.1 | 64966    | 0.56                         |
| <i>T. rosea</i> | NKXS01002382.1 | 65038    | 0.56                         |
| <i>T. rosea</i> | NKXS01002516.1 | 31836    | 0.56                         |
| <i>T. rosea</i> | NKXS01002530.1 | 107608   | 0.56                         |
| <i>T. rosea</i> | NKXS01002561.1 | 2302     | 0.56                         |
| <i>T. rosea</i> | NKXS01002616.1 | 41871    | 0.56                         |
| <i>T. rosea</i> | NKXS01002684.1 | 2862     | 0.56                         |
| <i>T. rosea</i> | NKXS01002705.1 | 111897   | 0.56                         |
| <i>T. rosea</i> | NKXS01002828.1 | 111355   | 0.56                         |
| <i>T. rosea</i> | NKXS01003004.1 | 64588    | 0.56                         |
| <i>T. rosea</i> | NKXS01003004.1 | 64720    | 0.56                         |
| <i>T. rosea</i> | NKXS01003057.1 | 19917    | 0.56                         |
| <i>T. rosea</i> | NKXS01003169.1 | 5736     | 0.56                         |
| <i>T. rosea</i> | NKXS01003364.1 | 6326     | 0.56                         |
| <i>T. rosea</i> | NKXS01003604.1 | 33558    | 0.56                         |
| <i>T. rosea</i> | NKXS01003640.1 | 26168    | 0.56                         |

|                 |                |        |      |
|-----------------|----------------|--------|------|
| <i>T. rosea</i> | NKXS01003835.1 | 8595   | 0.56 |
| <i>T. rosea</i> | NKXS01004051.1 | 67424  | 0.56 |
| <i>T. rosea</i> | NKXS01004849.1 | 8347   | 0.56 |
| <i>T. rosea</i> | NKXS01004914.1 | 53217  | 0.56 |
| <i>T. rosea</i> | NKXS01005172.1 | 46058  | 0.56 |
| <i>T. rosea</i> | NKXS01005275.1 | 15301  | 0.56 |
| <i>T. rosea</i> | NKXS01005775.1 | 24660  | 0.56 |
| <i>T. rosea</i> | NKXS01005998.1 | 41264  | 0.56 |
| <i>T. rosea</i> | NKXS01006289.1 | 3049   | 0.56 |
| <i>T. rosea</i> | NKXS01006289.1 | 3121   | 0.56 |
| <i>T. rosea</i> | NKXS01006289.1 | 3175   | 0.56 |
| <i>T. rosea</i> | NKXS01007359.1 | 1916   | 0.56 |
| <i>T. rosea</i> | NKXS01007427.1 | 9702   | 0.56 |
| <i>T. rosea</i> | NKXS01007730.1 | 8109   | 0.56 |
| <i>T. rosea</i> | NKXS01008639.1 | 1678   | 0.56 |
| <i>T. rosea</i> | NKXS01000001.1 | 61812  | 0.44 |
| <i>T. rosea</i> | NKXS01000006.1 | 229571 | 0.44 |
| <i>T. rosea</i> | NKXS01000017.1 | 191991 | 0.44 |
| <i>T. rosea</i> | NKXS01000017.1 | 192064 | 0.44 |
| <i>T. rosea</i> | NKXS01000017.1 | 192073 | 0.44 |
| <i>T. rosea</i> | NKXS01000030.1 | 357800 | 0.44 |
| <i>T. rosea</i> | NKXS01000097.1 | 59148  | 0.44 |
| <i>T. rosea</i> | NKXS01000135.1 | 56029  | 0.44 |
| <i>T. rosea</i> | NKXS01000135.1 | 56033  | 0.44 |
| <i>T. rosea</i> | NKXS01000278.1 | 104587 | 0.44 |
| <i>T. rosea</i> | NKXS01000371.1 | 63194  | 0.44 |
| <i>T. rosea</i> | NKXS01000393.1 | 51484  | 0.44 |
| <i>T. rosea</i> | NKXS01000482.1 | 23946  | 0.44 |
| <i>T. rosea</i> | NKXS01000482.1 | 112979 | 0.44 |
| <i>T. rosea</i> | NKXS01000484.1 | 137279 | 0.44 |
| <i>T. rosea</i> | NKXS01000603.1 | 79214  | 0.44 |
| <i>T. rosea</i> | NKXS01000699.1 | 166268 | 0.44 |
| <i>T. rosea</i> | NKXS01000703.1 | 21047  | 0.44 |
| <i>T. rosea</i> | NKXS01000719.1 | 144319 | 0.44 |
| <i>T. rosea</i> | NKXS01000732.1 | 25744  | 0.44 |
| <i>T. rosea</i> | NKXS01000791.1 | 14455  | 0.44 |
| <i>T. rosea</i> | NKXS01000791.1 | 14512  | 0.44 |
| <i>T. rosea</i> | NKXS01000791.1 | 14545  | 0.44 |
| <i>T. rosea</i> | NKXS01000791.1 | 14551  | 0.44 |
| <i>T. rosea</i> | NKXS01000822.1 | 63482  | 0.44 |
| <i>T. rosea</i> | NKXS01000852.1 | 105213 | 0.44 |
| <i>T. rosea</i> | NKXS01000873.1 | 6787   | 0.44 |
| <i>T. rosea</i> | NKXS01000891.1 | 36248  | 0.44 |
| <i>T. rosea</i> | NKXS01000891.1 | 36281  | 0.44 |

|                 |                |        |      |
|-----------------|----------------|--------|------|
| <i>T. rosea</i> | NKXS01000937.1 | 148995 | 0.44 |
| <i>T. rosea</i> | NKXS01000989.1 | 56088  | 0.44 |
| <i>T. rosea</i> | NKXS01001043.1 | 102196 | 0.44 |
| <i>T. rosea</i> | NKXS01001062.1 | 123116 | 0.44 |
| <i>T. rosea</i> | NKXS01001062.1 | 123183 | 0.44 |
| <i>T. rosea</i> | NKXS01001122.1 | 186144 | 0.44 |
| <i>T. rosea</i> | NKXS01001165.1 | 32139  | 0.44 |
| <i>T. rosea</i> | NKXS01001181.1 | 52193  | 0.44 |
| <i>T. rosea</i> | NKXS01001193.1 | 1086   | 0.44 |
| <i>T. rosea</i> | NKXS01001248.1 | 93134  | 0.44 |
| <i>T. rosea</i> | NKXS01001442.1 | 33370  | 0.44 |
| <i>T. rosea</i> | NKXS01001508.1 | 70614  | 0.44 |
| <i>T. rosea</i> | NKXS01001558.1 | 112709 | 0.44 |
| <i>T. rosea</i> | NKXS01001675.1 | 42247  | 0.44 |
| <i>T. rosea</i> | NKXS01001920.1 | 25793  | 0.44 |
| <i>T. rosea</i> | NKXS01002067.1 | 21821  | 0.44 |
| <i>T. rosea</i> | NKXS01002067.1 | 21857  | 0.44 |
| <i>T. rosea</i> | NKXS01002213.1 | 35346  | 0.44 |
| <i>T. rosea</i> | NKXS01002228.1 | 87458  | 0.44 |
| <i>T. rosea</i> | NKXS01002389.1 | 6893   | 0.44 |
| <i>T. rosea</i> | NKXS01002389.1 | 7102   | 0.44 |
| <i>T. rosea</i> | NKXS01002389.1 | 7118   | 0.44 |
| <i>T. rosea</i> | NKXS01002411.1 | 90610  | 0.44 |
| <i>T. rosea</i> | NKXS01002411.1 | 90769  | 0.44 |
| <i>T. rosea</i> | NKXS01002411.1 | 90771  | 0.44 |
| <i>T. rosea</i> | NKXS01002456.1 | 103791 | 0.44 |
| <i>T. rosea</i> | NKXS01002527.1 | 48659  | 0.44 |
| <i>T. rosea</i> | NKXS01002563.1 | 34335  | 0.44 |
| <i>T. rosea</i> | NKXS01002601.1 | 84922  | 0.44 |
| <i>T. rosea</i> | NKXS01002697.1 | 57601  | 0.44 |
| <i>T. rosea</i> | NKXS01002718.1 | 476    | 0.44 |
| <i>T. rosea</i> | NKXS01002718.1 | 2610   | 0.44 |
| <i>T. rosea</i> | NKXS01002718.1 | 2698   | 0.44 |
| <i>T. rosea</i> | NKXS01002718.1 | 2727   | 0.44 |
| <i>T. rosea</i> | NKXS01002744.1 | 77773  | 0.44 |
| <i>T. rosea</i> | NKXS01002749.1 | 28650  | 0.44 |
| <i>T. rosea</i> | NKXS01002749.1 | 28651  | 0.44 |
| <i>T. rosea</i> | NKXS01002825.1 | 122467 | 0.44 |
| <i>T. rosea</i> | NKXS01002927.1 | 55005  | 0.44 |
| <i>T. rosea</i> | NKXS01002966.1 | 37927  | 0.44 |
| <i>T. rosea</i> | NKXS01002979.1 | 12814  | 0.44 |
| <i>T. rosea</i> | NKXS01003344.1 | 24514  | 0.44 |
| <i>T. rosea</i> | NKXS01003409.1 | 3042   | 0.44 |
| <i>T. rosea</i> | NKXS01003474.1 | 55787  | 0.44 |

|                 |                |        |      |
|-----------------|----------------|--------|------|
| <i>T. rosea</i> | NKXS01003474.1 | 56029  | 0.44 |
| <i>T. rosea</i> | NKXS01003474.1 | 56145  | 0.44 |
| <i>T. rosea</i> | NKXS01003474.1 | 56239  | 0.44 |
| <i>T. rosea</i> | NKXS01003480.1 | 9457   | 0.44 |
| <i>T. rosea</i> | NKXS01003507.1 | 40849  | 0.44 |
| <i>T. rosea</i> | NKXS01003509.1 | 71520  | 0.44 |
| <i>T. rosea</i> | NKXS01003524.1 | 39640  | 0.44 |
| <i>T. rosea</i> | NKXS01003646.1 | 32753  | 0.44 |
| <i>T. rosea</i> | NKXS01003982.1 | 17758  | 0.44 |
| <i>T. rosea</i> | NKXS01004051.1 | 67324  | 0.44 |
| <i>T. rosea</i> | NKXS01004098.1 | 31971  | 0.44 |
| <i>T. rosea</i> | NKXS01004098.1 | 32022  | 0.44 |
| <i>T. rosea</i> | NKXS01004174.1 | 36643  | 0.44 |
| <i>T. rosea</i> | NKXS01004536.1 | 39606  | 0.44 |
| <i>T. rosea</i> | NKXS01004750.1 | 27332  | 0.44 |
| <i>T. rosea</i> | NKXS01004803.1 | 23046  | 0.44 |
| <i>T. rosea</i> | NKXS01004826.1 | 72539  | 0.44 |
| <i>T. rosea</i> | NKXS01004829.1 | 46727  | 0.44 |
| <i>T. rosea</i> | NKXS01004943.1 | 108110 | 0.44 |
| <i>T. rosea</i> | NKXS01004944.1 | 45086  | 0.44 |
| <i>T. rosea</i> | NKXS01005147.1 | 44060  | 0.44 |
| <i>T. rosea</i> | NKXS01005329.1 | 53476  | 0.44 |
| <i>T. rosea</i> | NKXS01005539.1 | 27398  | 0.44 |
| <i>T. rosea</i> | NKXS01005539.1 | 27411  | 0.44 |
| <i>T. rosea</i> | NKXS01005539.1 | 27507  | 0.44 |
| <i>T. rosea</i> | NKXS01005553.1 | 4270   | 0.44 |
| <i>T. rosea</i> | NKXS01005789.1 | 10681  | 0.44 |
| <i>T. rosea</i> | NKXS01005915.1 | 8810   | 0.44 |
| <i>T. rosea</i> | NKXS01005969.1 | 11254  | 0.44 |
| <i>T. rosea</i> | NKXS01005969.1 | 11299  | 0.44 |
| <i>T. rosea</i> | NKXS01006413.1 | 8137   | 0.44 |
| <i>T. rosea</i> | NKXS01006438.1 | 29672  | 0.44 |
| <i>T. rosea</i> | NKXS01006502.1 | 40617  | 0.44 |
| <i>T. rosea</i> | NKXS01006502.1 | 40666  | 0.44 |
| <i>T. rosea</i> | NKXS01006577.1 | 48355  | 0.44 |
| <i>T. rosea</i> | NKXS01006624.1 | 22408  | 0.44 |
| <i>T. rosea</i> | NKXS01006679.1 | 851    | 0.44 |
| <i>T. rosea</i> | NKXS01007014.1 | 7975   | 0.44 |
| <i>T. rosea</i> | NKXS01007014.1 | 7987   | 0.44 |
| <i>T. rosea</i> | NKXS01007049.1 | 23840  | 0.44 |
| <i>T. rosea</i> | NKXS01007049.1 | 23904  | 0.44 |
| <i>T. rosea</i> | NKXS01007333.1 | 5113   | 0.44 |
| <i>T. rosea</i> | NKXS01007606.1 | 15196  | 0.44 |
| <i>T. rosea</i> | NKXS01007606.1 | 15307  | 0.44 |

|                 |                |        |      |
|-----------------|----------------|--------|------|
| <i>T. rosea</i> | NKXS01007683.1 | 24376  | 0.44 |
| <i>T. rosea</i> | NKXS01007972.1 | 18177  | 0.44 |
| <i>T. rosea</i> | NKXS01007972.1 | 18212  | 0.44 |
| <i>T. rosea</i> | NKXS01007985.1 | 7004   | 0.44 |
| <i>T. rosea</i> | NKXS01008171.1 | 9317   | 0.44 |
| <i>T. rosea</i> | NKXS01008235.1 | 23568  | 0.44 |
| <i>T. rosea</i> | NKXS01008639.1 | 1455   | 0.44 |
| <i>T. rosea</i> | NKXS01008639.1 | 1456   | 0.44 |
| <i>T. rosea</i> | NKXS01008639.1 | 1460   | 0.44 |
| <i>T. rosea</i> | NKXS01009768.1 | 8043   | 0.44 |
| <i>T. rosea</i> | NKXS01010939.1 | 2419   | 0.44 |
| <i>T. rosea</i> | NKXS01000068.1 | 194398 | 0.33 |
| <i>T. rosea</i> | NKXS01000068.1 | 194413 | 0.33 |
| <i>T. rosea</i> | NKXS01000189.1 | 48173  | 0.33 |
| <i>T. rosea</i> | NKXS01000222.1 | 16343  | 0.33 |
| <i>T. rosea</i> | NKXS01000344.1 | 159816 | 0.33 |
| <i>T. rosea</i> | NKXS01000436.1 | 107398 | 0.33 |
| <i>T. rosea</i> | NKXS01000436.1 | 107421 | 0.33 |
| <i>T. rosea</i> | NKXS01000455.1 | 123566 | 0.33 |
| <i>T. rosea</i> | NKXS01000546.1 | 29607  | 0.33 |
| <i>T. rosea</i> | NKXS01000546.1 | 29688  | 0.33 |
| <i>T. rosea</i> | NKXS01000546.1 | 29710  | 0.33 |
| <i>T. rosea</i> | NKXS01000568.1 | 117010 | 0.33 |
| <i>T. rosea</i> | NKXS01000584.1 | 9370   | 0.33 |
| <i>T. rosea</i> | NKXS01000584.1 | 9385   | 0.33 |
| <i>T. rosea</i> | NKXS01000699.1 | 166293 | 0.33 |
| <i>T. rosea</i> | NKXS01000703.1 | 44668  | 0.33 |
| <i>T. rosea</i> | NKXS01000788.1 | 52296  | 0.33 |
| <i>T. rosea</i> | NKXS01000822.1 | 63683  | 0.33 |
| <i>T. rosea</i> | NKXS01000852.1 | 105227 | 0.33 |
| <i>T. rosea</i> | NKXS01000873.1 | 6872   | 0.33 |
| <i>T. rosea</i> | NKXS01000874.1 | 28641  | 0.33 |
| <i>T. rosea</i> | NKXS01000874.1 | 28643  | 0.33 |
| <i>T. rosea</i> | NKXS01000952.1 | 76471  | 0.33 |
| <i>T. rosea</i> | NKXS01000952.1 | 76513  | 0.33 |
| <i>T. rosea</i> | NKXS01000985.1 | 88261  | 0.33 |
| <i>T. rosea</i> | NKXS01000995.1 | 31208  | 0.33 |
| <i>T. rosea</i> | NKXS01001004.1 | 68417  | 0.33 |
| <i>T. rosea</i> | NKXS01001004.1 | 68492  | 0.33 |
| <i>T. rosea</i> | NKXS01001059.1 | 139742 | 0.33 |
| <i>T. rosea</i> | NKXS01001082.1 | 31358  | 0.33 |
| <i>T. rosea</i> | NKXS01001087.1 | 107157 | 0.33 |
| <i>T. rosea</i> | NKXS01001170.1 | 1027   | 0.33 |
| <i>T. rosea</i> | NKXS01001170.1 | 1028   | 0.33 |

|                 |                |        |      |
|-----------------|----------------|--------|------|
| <i>T. rosea</i> | NKXS01001245.1 | 26562  | 0.33 |
| <i>T. rosea</i> | NKXS01001325.1 | 168741 | 0.33 |
| <i>T. rosea</i> | NKXS01001328.1 | 60463  | 0.33 |
| <i>T. rosea</i> | NKXS01001347.1 | 33217  | 0.33 |
| <i>T. rosea</i> | NKXS01001665.1 | 61673  | 0.33 |
| <i>T. rosea</i> | NKXS01001783.1 | 38517  | 0.33 |
| <i>T. rosea</i> | NKXS01001789.1 | 32939  | 0.33 |
| <i>T. rosea</i> | NKXS01002001.1 | 70851  | 0.33 |
| <i>T. rosea</i> | NKXS01002161.1 | 84461  | 0.33 |
| <i>T. rosea</i> | NKXS01002192.1 | 80523  | 0.33 |
| <i>T. rosea</i> | NKXS01002210.1 | 249    | 0.33 |
| <i>T. rosea</i> | NKXS01002389.1 | 6853   | 0.33 |
| <i>T. rosea</i> | NKXS01002482.1 | 14552  | 0.33 |
| <i>T. rosea</i> | NKXS01002697.1 | 57523  | 0.33 |
| <i>T. rosea</i> | NKXS01002697.1 | 57599  | 0.33 |
| <i>T. rosea</i> | NKXS01002716.1 | 14972  | 0.33 |
| <i>T. rosea</i> | NKXS01002716.1 | 14995  | 0.33 |
| <i>T. rosea</i> | NKXS01002716.1 | 15073  | 0.33 |
| <i>T. rosea</i> | NKXS01002716.1 | 15084  | 0.33 |
| <i>T. rosea</i> | NKXS01002717.1 | 2792   | 0.33 |
| <i>T. rosea</i> | NKXS01002718.1 | 474    | 0.33 |
| <i>T. rosea</i> | NKXS01002749.1 | 28565  | 0.33 |
| <i>T. rosea</i> | NKXS01002749.1 | 28566  | 0.33 |
| <i>T. rosea</i> | NKXS01002749.1 | 28586  | 0.33 |
| <i>T. rosea</i> | NKXS01002805.1 | 97857  | 0.33 |
| <i>T. rosea</i> | NKXS01002927.1 | 54734  | 0.33 |
| <i>T. rosea</i> | NKXS01002938.1 | 53048  | 0.33 |
| <i>T. rosea</i> | NKXS01002938.1 | 53135  | 0.33 |
| <i>T. rosea</i> | NKXS01003038.1 | 40937  | 0.33 |
| <i>T. rosea</i> | NKXS01003088.1 | 67314  | 0.33 |
| <i>T. rosea</i> | NKXS01003089.1 | 110964 | 0.33 |
| <i>T. rosea</i> | NKXS01003336.1 | 9742   | 0.33 |
| <i>T. rosea</i> | NKXS01003406.1 | 54329  | 0.33 |
| <i>T. rosea</i> | NKXS01003418.1 | 65321  | 0.33 |
| <i>T. rosea</i> | NKXS01003490.1 | 12821  | 0.33 |
| <i>T. rosea</i> | NKXS01003507.1 | 41037  | 0.33 |
| <i>T. rosea</i> | NKXS01003524.1 | 39678  | 0.33 |
| <i>T. rosea</i> | NKXS01003852.1 | 29179  | 0.33 |
| <i>T. rosea</i> | NKXS01003852.1 | 29242  | 0.33 |
| <i>T. rosea</i> | NKXS01003852.1 | 29278  | 0.33 |
| <i>T. rosea</i> | NKXS01003852.1 | 29308  | 0.33 |
| <i>T. rosea</i> | NKXS01003852.1 | 29331  | 0.33 |
| <i>T. rosea</i> | NKXS01003852.1 | 29332  | 0.33 |
| <i>T. rosea</i> | NKXS01003854.1 | 25070  | 0.33 |

|                 |                |        |      |
|-----------------|----------------|--------|------|
| <i>T. rosea</i> | NKXS01004098.1 | 31670  | 0.33 |
| <i>T. rosea</i> | NKXS01004098.1 | 31989  | 0.33 |
| <i>T. rosea</i> | NKXS01004098.1 | 32075  | 0.33 |
| <i>T. rosea</i> | NKXS01004162.1 | 36633  | 0.33 |
| <i>T. rosea</i> | NKXS01004283.1 | 13140  | 0.33 |
| <i>T. rosea</i> | NKXS01004473.1 | 7188   | 0.33 |
| <i>T. rosea</i> | NKXS01004513.1 | 34009  | 0.33 |
| <i>T. rosea</i> | NKXS01004579.1 | 41205  | 0.33 |
| <i>T. rosea</i> | NKXS01004803.1 | 23022  | 0.33 |
| <i>T. rosea</i> | NKXS01005069.1 | 6024   | 0.33 |
| <i>T. rosea</i> | NKXS01005069.1 | 6105   | 0.33 |
| <i>T. rosea</i> | NKXS01005147.1 | 44084  | 0.33 |
| <i>T. rosea</i> | NKXS01005165.1 | 14574  | 0.33 |
| <i>T. rosea</i> | NKXS01005176.1 | 22756  | 0.33 |
| <i>T. rosea</i> | NKXS01005245.1 | 26962  | 0.33 |
| <i>T. rosea</i> | NKXS01005296.1 | 5760   | 0.33 |
| <i>T. rosea</i> | NKXS01005560.1 | 44878  | 0.33 |
| <i>T. rosea</i> | NKXS01005797.1 | 3376   | 0.33 |
| <i>T. rosea</i> | NKXS01005998.1 | 41281  | 0.33 |
| <i>T. rosea</i> | NKXS01006250.1 | 16948  | 0.33 |
| <i>T. rosea</i> | NKXS01006250.1 | 17015  | 0.33 |
| <i>T. rosea</i> | NKXS01006487.1 | 1149   | 0.33 |
| <i>T. rosea</i> | NKXS01006487.1 | 1209   | 0.33 |
| <i>T. rosea</i> | NKXS01006853.1 | 2587   | 0.33 |
| <i>T. rosea</i> | NKXS01006853.1 | 2612   | 0.33 |
| <i>T. rosea</i> | NKXS01006897.1 | 2107   | 0.33 |
| <i>T. rosea</i> | NKXS01008169.1 | 31362  | 0.33 |
| <i>T. rosea</i> | NKXS01008197.1 | 13752  | 0.33 |
| <i>T. rosea</i> | NKXS01008732.1 | 9661   | 0.33 |
| <i>T. rosea</i> | NKXS01008732.1 | 9719   | 0.33 |
| <i>T. rosea</i> | NKXS01008813.1 | 1707   | 0.33 |
| <i>T. rosea</i> | NKXS01009173.1 | 15394  | 0.33 |
| <i>T. rosea</i> | NKXS01009180.1 | 8414   | 0.33 |
| <i>T. rosea</i> | NKXS01000030.1 | 357849 | 0.22 |
| <i>T. rosea</i> | NKXS01000149.1 | 102635 | 0.22 |
| <i>T. rosea</i> | NKXS01000149.1 | 102661 | 0.22 |
| <i>T. rosea</i> | NKXS01000188.1 | 48702  | 0.22 |
| <i>T. rosea</i> | NKXS01000189.1 | 23370  | 0.22 |
| <i>T. rosea</i> | NKXS01000203.1 | 38687  | 0.22 |
| <i>T. rosea</i> | NKXS01000455.1 | 123548 | 0.22 |
| <i>T. rosea</i> | NKXS01000455.1 | 123575 | 0.22 |
| <i>T. rosea</i> | NKXS01000455.1 | 123602 | 0.22 |
| <i>T. rosea</i> | NKXS01000455.1 | 123620 | 0.22 |
| <i>T. rosea</i> | NKXS01000474.1 | 20264  | 0.22 |

|                 |                |        |      |
|-----------------|----------------|--------|------|
| <i>T. rosea</i> | NKXS01000474.1 | 20270  | 0.22 |
| <i>T. rosea</i> | NKXS01000474.1 | 20417  | 0.22 |
| <i>T. rosea</i> | NKXS01000504.1 | 95426  | 0.22 |
| <i>T. rosea</i> | NKXS01000504.1 | 95501  | 0.22 |
| <i>T. rosea</i> | NKXS01000699.1 | 166281 | 0.22 |
| <i>T. rosea</i> | NKXS01000719.1 | 152945 | 0.22 |
| <i>T. rosea</i> | NKXS01000822.1 | 63645  | 0.22 |
| <i>T. rosea</i> | NKXS01000844.1 | 149696 | 0.22 |
| <i>T. rosea</i> | NKXS01000985.1 | 88192  | 0.22 |
| <i>T. rosea</i> | NKXS01000989.1 | 56054  | 0.22 |
| <i>T. rosea</i> | NKXS01001049.1 | 72136  | 0.22 |
| <i>T. rosea</i> | NKXS01001062.1 | 123179 | 0.22 |
| <i>T. rosea</i> | NKXS01001062.1 | 123191 | 0.22 |
| <i>T. rosea</i> | NKXS01001062.1 | 123237 | 0.22 |
| <i>T. rosea</i> | NKXS01001087.1 | 107177 | 0.22 |
| <i>T. rosea</i> | NKXS01001250.1 | 115750 | 0.22 |
| <i>T. rosea</i> | NKXS01001250.1 | 115824 | 0.22 |
| <i>T. rosea</i> | NKXS01001252.1 | 93756  | 0.22 |
| <i>T. rosea</i> | NKXS01001288.1 | 25968  | 0.22 |
| <i>T. rosea</i> | NKXS01001325.1 | 168792 | 0.22 |
| <i>T. rosea</i> | NKXS01001387.1 | 129322 | 0.22 |
| <i>T. rosea</i> | NKXS01001466.1 | 147684 | 0.22 |
| <i>T. rosea</i> | NKXS01001466.1 | 147800 | 0.22 |
| <i>T. rosea</i> | NKXS01001561.1 | 7753   | 0.22 |
| <i>T. rosea</i> | NKXS01001708.1 | 9517   | 0.22 |
| <i>T. rosea</i> | NKXS01001802.1 | 11970  | 0.22 |
| <i>T. rosea</i> | NKXS01001828.1 | 62129  | 0.22 |
| <i>T. rosea</i> | NKXS01001896.1 | 16986  | 0.22 |
| <i>T. rosea</i> | NKXS01001949.1 | 77850  | 0.22 |
| <i>T. rosea</i> | NKXS01002000.1 | 25026  | 0.22 |
| <i>T. rosea</i> | NKXS01002170.1 | 26505  | 0.22 |
| <i>T. rosea</i> | NKXS01002268.1 | 5900   | 0.22 |
| <i>T. rosea</i> | NKXS01002330.1 | 21346  | 0.22 |
| <i>T. rosea</i> | NKXS01002364.1 | 5205   | 0.22 |
| <i>T. rosea</i> | NKXS01002383.1 | 76465  | 0.22 |
| <i>T. rosea</i> | NKXS01002394.1 | 88239  | 0.22 |
| <i>T. rosea</i> | NKXS01002403.1 | 18021  | 0.22 |
| <i>T. rosea</i> | NKXS01002403.1 | 18197  | 0.22 |
| <i>T. rosea</i> | NKXS01002417.1 | 29503  | 0.22 |
| <i>T. rosea</i> | NKXS01002435.1 | 9792   | 0.22 |
| <i>T. rosea</i> | NKXS01002435.1 | 9851   | 0.22 |
| <i>T. rosea</i> | NKXS01002516.1 | 31786  | 0.22 |
| <i>T. rosea</i> | NKXS01002572.1 | 15332  | 0.22 |
| <i>T. rosea</i> | NKXS01002623.1 | 13433  | 0.22 |



|                 |                |       |      |
|-----------------|----------------|-------|------|
| <i>T. rosea</i> | NKXS01002633.1 | 83104 | 0.22 |
| <i>T. rosea</i> | NKXS01002633.1 | 83128 | 0.22 |
| <i>T. rosea</i> | NKXS01002655.1 | 3758  | 0.22 |
| <i>T. rosea</i> | NKXS01002697.1 | 57403 | 0.22 |
| <i>T. rosea</i> | NKXS01002716.1 | 15018 | 0.22 |
| <i>T. rosea</i> | NKXS01002716.1 | 15169 | 0.22 |
| <i>T. rosea</i> | NKXS01002717.1 | 2852  | 0.22 |
| <i>T. rosea</i> | NKXS01002718.1 | 352   | 0.22 |
| <i>T. rosea</i> | NKXS01002718.1 | 448   | 0.22 |
| <i>T. rosea</i> | NKXS01002718.1 | 485   | 0.22 |
| <i>T. rosea</i> | NKXS01002718.1 | 1732  | 0.22 |
| <i>T. rosea</i> | NKXS01002749.1 | 28552 | 0.22 |
| <i>T. rosea</i> | NKXS01002749.1 | 28571 | 0.22 |
| <i>T. rosea</i> | NKXS01002854.1 | 36516 | 0.22 |
| <i>T. rosea</i> | NKXS01002872.1 | 85761 | 0.22 |
| <i>T. rosea</i> | NKXS01002979.1 | 12703 | 0.22 |
| <i>T. rosea</i> | NKXS01003335.1 | 9448  | 0.22 |
| <i>T. rosea</i> | NKXS01003395.1 | 8889  | 0.22 |
| <i>T. rosea</i> | NKXS01003599.1 | 42822 | 0.22 |
| <i>T. rosea</i> | NKXS01003645.1 | 12014 | 0.22 |
| <i>T. rosea</i> | NKXS01003669.1 | 86096 | 0.22 |
| <i>T. rosea</i> | NKXS01003678.1 | 27121 | 0.22 |
| <i>T. rosea</i> | NKXS01003678.1 | 27146 | 0.22 |
| <i>T. rosea</i> | NKXS01003854.1 | 25137 | 0.22 |
| <i>T. rosea</i> | NKXS01003893.1 | 24298 | 0.22 |
| <i>T. rosea</i> | NKXS01003974.1 | 41848 | 0.22 |
| <i>T. rosea</i> | NKXS01003987.1 | 37324 | 0.22 |
| <i>T. rosea</i> | NKXS01004139.1 | 44259 | 0.22 |
| <i>T. rosea</i> | NKXS01004139.1 | 44271 | 0.22 |
| <i>T. rosea</i> | NKXS01004162.1 | 36556 | 0.22 |
| <i>T. rosea</i> | NKXS01004184.1 | 74655 | 0.22 |
| <i>T. rosea</i> | NKXS01004347.1 | 22821 | 0.22 |
| <i>T. rosea</i> | NKXS01004347.1 | 22910 | 0.22 |
| <i>T. rosea</i> | NKXS01004473.1 | 7075  | 0.22 |
| <i>T. rosea</i> | NKXS01004504.1 | 16187 | 0.22 |
| <i>T. rosea</i> | NKXS01004513.1 | 33991 | 0.22 |
| <i>T. rosea</i> | NKXS01004944.1 | 44841 | 0.22 |
| <i>T. rosea</i> | NKXS01005274.1 | 19093 | 0.22 |
| <i>T. rosea</i> | NKXS01005329.1 | 53400 | 0.22 |
| <i>T. rosea</i> | NKXS01005329.1 | 53415 | 0.22 |
| <i>T. rosea</i> | NKXS01005329.1 | 53437 | 0.22 |
| <i>T. rosea</i> | NKXS01005329.1 | 53487 | 0.22 |
| <i>T. rosea</i> | NKXS01005329.1 | 53556 | 0.22 |
| <i>T. rosea</i> | NKXS01005541.1 | 9550  | 0.22 |

|                 |                |        |      |
|-----------------|----------------|--------|------|
| <i>T. rosea</i> | NKXS01005553.1 | 4110   | 0.22 |
| <i>T. rosea</i> | NKXS01005569.1 | 29282  | 0.22 |
| <i>T. rosea</i> | NKXS01005697.1 | 60337  | 0.22 |
| <i>T. rosea</i> | NKXS01005744.1 | 10331  | 0.22 |
| <i>T. rosea</i> | NKXS01005789.1 | 10643  | 0.22 |
| <i>T. rosea</i> | NKXS01006095.1 | 48676  | 0.22 |
| <i>T. rosea</i> | NKXS01006095.1 | 48808  | 0.22 |
| <i>T. rosea</i> | NKXS01006119.1 | 13129  | 0.22 |
| <i>T. rosea</i> | NKXS01006228.1 | 29056  | 0.22 |
| <i>T. rosea</i> | NKXS01006250.1 | 16820  | 0.22 |
| <i>T. rosea</i> | NKXS01006250.1 | 17035  | 0.22 |
| <i>T. rosea</i> | NKXS01006479.1 | 34413  | 0.22 |
| <i>T. rosea</i> | NKXS01006479.1 | 34414  | 0.22 |
| <i>T. rosea</i> | NKXS01006502.1 | 20620  | 0.22 |
| <i>T. rosea</i> | NKXS01006897.1 | 2222   | 0.22 |
| <i>T. rosea</i> | NKXS01007005.1 | 31280  | 0.22 |
| <i>T. rosea</i> | NKXS01007005.1 | 31310  | 0.22 |
| <i>T. rosea</i> | NKXS01007210.1 | 25052  | 0.22 |
| <i>T. rosea</i> | NKXS01007229.1 | 19489  | 0.22 |
| <i>T. rosea</i> | NKXS01007972.1 | 18244  | 0.22 |
| <i>T. rosea</i> | NKXS01008082.1 | 22416  | 0.22 |
| <i>T. rosea</i> | NKXS01008129.1 | 10408  | 0.22 |
| <i>T. rosea</i> | NKXS01008813.1 | 1765   | 0.22 |
| <i>T. rosea</i> | NKXS01008960.1 | 4694   | 0.22 |
| <i>T. rosea</i> | NKXS01008960.1 | 4847   | 0.22 |
| <i>T. rosea</i> | NKXS01009188.1 | 8982   | 0.22 |
| <i>T. rosea</i> | NKXS01009944.1 | 3120   | 0.22 |
| <i>T. rosea</i> | NKXS01010411.1 | 4128   | 0.22 |
| <i>T. rosea</i> | NKXS01010783.1 | 2761   | 0.22 |
| <i>T. rosea</i> | NKXS01000041.1 | 292621 | 0.11 |
| <i>T. rosea</i> | NKXS01000081.1 | 58584  | 0.11 |
| <i>T. rosea</i> | NKXS01000081.1 | 58618  | 0.11 |
| <i>T. rosea</i> | NKXS01000094.1 | 184225 | 0.11 |
| <i>T. rosea</i> | NKXS01000097.1 | 197    | 0.11 |
| <i>T. rosea</i> | NKXS01000097.1 | 67620  | 0.11 |
| <i>T. rosea</i> | NKXS01000153.1 | 17473  | 0.11 |
| <i>T. rosea</i> | NKXS01000203.1 | 38613  | 0.11 |
| <i>T. rosea</i> | NKXS01000207.1 | 158371 | 0.11 |
| <i>T. rosea</i> | NKXS01000220.1 | 160328 | 0.11 |
| <i>T. rosea</i> | NKXS01000243.1 | 212157 | 0.11 |
| <i>T. rosea</i> | NKXS01000298.1 | 59312  | 0.11 |
| <i>T. rosea</i> | NKXS01000344.1 | 34736  | 0.11 |
| <i>T. rosea</i> | NKXS01000371.1 | 63206  | 0.11 |
| <i>T. rosea</i> | NKXS01000504.1 | 95486  | 0.11 |

|                 |                |        |      |
|-----------------|----------------|--------|------|
| <i>T. rosea</i> | NKXS01000538.1 | 5542   | 0.11 |
| <i>T. rosea</i> | NKXS01000538.1 | 5683   | 0.11 |
| <i>T. rosea</i> | NKXS01000562.1 | 87071  | 0.11 |
| <i>T. rosea</i> | NKXS01000603.1 | 79160  | 0.11 |
| <i>T. rosea</i> | NKXS01000642.1 | 19829  | 0.11 |
| <i>T. rosea</i> | NKXS01000662.1 | 95831  | 0.11 |
| <i>T. rosea</i> | NKXS01000662.1 | 95862  | 0.11 |
| <i>T. rosea</i> | NKXS01000733.1 | 6860   | 0.11 |
| <i>T. rosea</i> | NKXS01000733.1 | 6975   | 0.11 |
| <i>T. rosea</i> | NKXS01000757.1 | 51020  | 0.11 |
| <i>T. rosea</i> | NKXS01000814.1 | 20872  | 0.11 |
| <i>T. rosea</i> | NKXS01000851.1 | 3706   | 0.11 |
| <i>T. rosea</i> | NKXS01000880.1 | 76766  | 0.11 |
| <i>T. rosea</i> | NKXS01000880.1 | 76821  | 0.11 |
| <i>T. rosea</i> | NKXS01000880.1 | 76895  | 0.11 |
| <i>T. rosea</i> | NKXS01000901.1 | 231328 | 0.11 |
| <i>T. rosea</i> | NKXS01000919.1 | 35015  | 0.11 |
| <i>T. rosea</i> | NKXS01000919.1 | 35077  | 0.11 |
| <i>T. rosea</i> | NKXS01000927.1 | 91312  | 0.11 |
| <i>T. rosea</i> | NKXS01000956.1 | 9596   | 0.11 |
| <i>T. rosea</i> | NKXS01000965.1 | 45419  | 0.11 |
| <i>T. rosea</i> | NKXS01001004.1 | 71246  | 0.11 |
| <i>T. rosea</i> | NKXS01001004.1 | 71308  | 0.11 |
| <i>T. rosea</i> | NKXS01001004.1 | 71404  | 0.11 |
| <i>T. rosea</i> | NKXS01001004.1 | 71428  | 0.11 |
| <i>T. rosea</i> | NKXS01001028.1 | 33379  | 0.11 |
| <i>T. rosea</i> | NKXS01001049.1 | 114286 | 0.11 |
| <i>T. rosea</i> | NKXS01001049.1 | 114292 | 0.11 |
| <i>T. rosea</i> | NKXS01001087.1 | 107133 | 0.11 |
| <i>T. rosea</i> | NKXS01001087.1 | 107137 | 0.11 |
| <i>T. rosea</i> | NKXS01001087.1 | 107174 | 0.11 |
| <i>T. rosea</i> | NKXS01001087.1 | 108889 | 0.11 |
| <i>T. rosea</i> | NKXS01001087.1 | 109088 | 0.11 |
| <i>T. rosea</i> | NKXS01001250.1 | 115768 | 0.11 |
| <i>T. rosea</i> | NKXS01001250.1 | 115775 | 0.11 |
| <i>T. rosea</i> | NKXS01001250.1 | 115778 | 0.11 |
| <i>T. rosea</i> | NKXS01001250.1 | 115779 | 0.11 |
| <i>T. rosea</i> | NKXS01001288.1 | 25885  | 0.11 |
| <i>T. rosea</i> | NKXS01001331.1 | 51141  | 0.11 |
| <i>T. rosea</i> | NKXS01001432.1 | 656    | 0.11 |
| <i>T. rosea</i> | NKXS01001501.1 | 9223   | 0.11 |
| <i>T. rosea</i> | NKXS01001558.1 | 112756 | 0.11 |
| <i>T. rosea</i> | NKXS01001675.1 | 42989  | 0.11 |
| <i>T. rosea</i> | NKXS01001678.1 | 84676  | 0.11 |

|                 |                |        |      |
|-----------------|----------------|--------|------|
| <i>T. rosea</i> | NKXS01001744.1 | 77331  | 0.11 |
| <i>T. rosea</i> | NKXS01001772.1 | 58240  | 0.11 |
| <i>T. rosea</i> | NKXS01001772.1 | 58286  | 0.11 |
| <i>T. rosea</i> | NKXS01001783.1 | 38599  | 0.11 |
| <i>T. rosea</i> | NKXS01001851.1 | 1742   | 0.11 |
| <i>T. rosea</i> | NKXS01001862.1 | 134312 | 0.11 |
| <i>T. rosea</i> | NKXS01001949.1 | 77834  | 0.11 |
| <i>T. rosea</i> | NKXS01002071.1 | 83391  | 0.11 |
| <i>T. rosea</i> | NKXS01002071.1 | 83428  | 0.11 |
| <i>T. rosea</i> | NKXS01002071.1 | 83430  | 0.11 |
| <i>T. rosea</i> | NKXS01002071.1 | 83523  | 0.11 |
| <i>T. rosea</i> | NKXS01002071.1 | 83553  | 0.11 |
| <i>T. rosea</i> | NKXS01002071.1 | 83577  | 0.11 |
| <i>T. rosea</i> | NKXS01002328.1 | 79200  | 0.11 |
| <i>T. rosea</i> | NKXS01002389.1 | 6993   | 0.11 |
| <i>T. rosea</i> | NKXS01002403.1 | 18181  | 0.11 |
| <i>T. rosea</i> | NKXS01002417.1 | 29492  | 0.11 |
| <i>T. rosea</i> | NKXS01002456.1 | 103772 | 0.11 |
| <i>T. rosea</i> | NKXS01002456.1 | 103781 | 0.11 |
| <i>T. rosea</i> | NKXS01002456.1 | 103802 | 0.11 |
| <i>T. rosea</i> | NKXS01002469.1 | 72983  | 0.11 |
| <i>T. rosea</i> | NKXS01002495.1 | 11994  | 0.11 |
| <i>T. rosea</i> | NKXS01002563.1 | 34271  | 0.11 |
| <i>T. rosea</i> | NKXS01002571.1 | 85245  | 0.11 |
| <i>T. rosea</i> | NKXS01002600.1 | 38051  | 0.11 |
| <i>T. rosea</i> | NKXS01002633.1 | 82937  | 0.11 |
| <i>T. rosea</i> | NKXS01002674.1 | 43651  | 0.11 |
| <i>T. rosea</i> | NKXS01002684.1 | 2898   | 0.11 |
| <i>T. rosea</i> | NKXS01002717.1 | 2770   | 0.11 |
| <i>T. rosea</i> | NKXS01002718.1 | 406    | 0.11 |
| <i>T. rosea</i> | NKXS01002718.1 | 455    | 0.11 |
| <i>T. rosea</i> | NKXS01002718.1 | 465    | 0.11 |
| <i>T. rosea</i> | NKXS01002718.1 | 468    | 0.11 |
| <i>T. rosea</i> | NKXS01002718.1 | 491    | 0.11 |
| <i>T. rosea</i> | NKXS01002718.1 | 572    | 0.11 |
| <i>T. rosea</i> | NKXS01002718.1 | 1782   | 0.11 |
| <i>T. rosea</i> | NKXS01002730.1 | 26444  | 0.11 |
| <i>T. rosea</i> | NKXS01002730.1 | 26602  | 0.11 |
| <i>T. rosea</i> | NKXS01002767.1 | 60104  | 0.11 |
| <i>T. rosea</i> | NKXS01002789.1 | 68359  | 0.11 |
| <i>T. rosea</i> | NKXS01002854.1 | 36425  | 0.11 |
| <i>T. rosea</i> | NKXS01002854.1 | 36491  | 0.11 |
| <i>T. rosea</i> | NKXS01002872.1 | 85678  | 0.11 |
| <i>T. rosea</i> | NKXS01002872.1 | 85712  | 0.11 |

|                 |                |       |      |
|-----------------|----------------|-------|------|
| <i>T. rosea</i> | NKXS01002874.1 | 3516  | 0.11 |
| <i>T. rosea</i> | NKXS01003038.1 | 40752 | 0.11 |
| <i>T. rosea</i> | NKXS01003038.1 | 40764 | 0.11 |
| <i>T. rosea</i> | NKXS01003038.1 | 40796 | 0.11 |
| <i>T. rosea</i> | NKXS01003038.1 | 40799 | 0.11 |
| <i>T. rosea</i> | NKXS01003038.1 | 40810 | 0.11 |
| <i>T. rosea</i> | NKXS01003038.1 | 40812 | 0.11 |
| <i>T. rosea</i> | NKXS01003038.1 | 74427 | 0.11 |
| <i>T. rosea</i> | NKXS01003045.1 | 23225 | 0.11 |
| <i>T. rosea</i> | NKXS01003169.1 | 5583  | 0.11 |
| <i>T. rosea</i> | NKXS01003169.1 | 5709  | 0.11 |
| <i>T. rosea</i> | NKXS01003335.1 | 9361  | 0.11 |
| <i>T. rosea</i> | NKXS01003395.1 | 8830  | 0.11 |
| <i>T. rosea</i> | NKXS01003409.1 | 2969  | 0.11 |
| <i>T. rosea</i> | NKXS01003424.1 | 8433  | 0.11 |
| <i>T. rosea</i> | NKXS01003524.1 | 39709 | 0.11 |
| <i>T. rosea</i> | NKXS01003524.1 | 39731 | 0.11 |
| <i>T. rosea</i> | NKXS01003529.1 | 17106 | 0.11 |
| <i>T. rosea</i> | NKXS01003576.1 | 98109 | 0.11 |
| <i>T. rosea</i> | NKXS01003652.1 | 22202 | 0.11 |
| <i>T. rosea</i> | NKXS01003669.1 | 85903 | 0.11 |
| <i>T. rosea</i> | NKXS01003681.1 | 1469  | 0.11 |
| <i>T. rosea</i> | NKXS01003681.1 | 1519  | 0.11 |
| <i>T. rosea</i> | NKXS01003681.1 | 1582  | 0.11 |
| <i>T. rosea</i> | NKXS01003690.1 | 94350 | 0.11 |
| <i>T. rosea</i> | NKXS01003746.1 | 77834 | 0.11 |
| <i>T. rosea</i> | NKXS01003783.1 | 36054 | 0.11 |
| <i>T. rosea</i> | NKXS01003854.1 | 25061 | 0.11 |
| <i>T. rosea</i> | NKXS01003854.1 | 25216 | 0.11 |
| <i>T. rosea</i> | NKXS01003878.1 | 17113 | 0.11 |
| <i>T. rosea</i> | NKXS01003926.1 | 68337 | 0.11 |
| <i>T. rosea</i> | NKXS01003926.1 | 68390 | 0.11 |
| <i>T. rosea</i> | NKXS01003926.1 | 68444 | 0.11 |
| <i>T. rosea</i> | NKXS01003926.1 | 68513 | 0.11 |
| <i>T. rosea</i> | NKXS01003978.1 | 39117 | 0.11 |
| <i>T. rosea</i> | NKXS01003987.1 | 37115 | 0.11 |
| <i>T. rosea</i> | NKXS01004039.1 | 50681 | 0.11 |
| <i>T. rosea</i> | NKXS01004051.1 | 67352 | 0.11 |
| <i>T. rosea</i> | NKXS01004098.1 | 31871 | 0.11 |
| <i>T. rosea</i> | NKXS01004098.1 | 32057 | 0.11 |
| <i>T. rosea</i> | NKXS01004162.1 | 36487 | 0.11 |
| <i>T. rosea</i> | NKXS01004162.1 | 36596 | 0.11 |
| <i>T. rosea</i> | NKXS01004162.1 | 36610 | 0.11 |
| <i>T. rosea</i> | NKXS01004162.1 | 36615 | 0.11 |

|                 |                |        |      |
|-----------------|----------------|--------|------|
| <i>T. rosea</i> | NKXS01004162.1 | 36622  | 0.11 |
| <i>T. rosea</i> | NKXS01004162.1 | 36627  | 0.11 |
| <i>T. rosea</i> | NKXS01004174.1 | 36780  | 0.11 |
| <i>T. rosea</i> | NKXS01004180.1 | 77518  | 0.11 |
| <i>T. rosea</i> | NKXS01004200.1 | 44981  | 0.11 |
| <i>T. rosea</i> | NKXS01004285.1 | 21065  | 0.11 |
| <i>T. rosea</i> | NKXS01004331.1 | 46679  | 0.11 |
| <i>T. rosea</i> | NKXS01004473.1 | 7238   | 0.11 |
| <i>T. rosea</i> | NKXS01004507.1 | 110733 | 0.11 |
| <i>T. rosea</i> | NKXS01004507.1 | 110741 | 0.11 |
| <i>T. rosea</i> | NKXS01004507.1 | 110790 | 0.11 |
| <i>T. rosea</i> | NKXS01004565.1 | 25486  | 0.11 |
| <i>T. rosea</i> | NKXS01004565.1 | 25491  | 0.11 |
| <i>T. rosea</i> | NKXS01004565.1 | 25501  | 0.11 |
| <i>T. rosea</i> | NKXS01004750.1 | 26921  | 0.11 |
| <i>T. rosea</i> | NKXS01004763.1 | 41203  | 0.11 |
| <i>T. rosea</i> | NKXS01004803.1 | 22819  | 0.11 |
| <i>T. rosea</i> | NKXS01004834.1 | 45934  | 0.11 |
| <i>T. rosea</i> | NKXS01004837.1 | 4229   | 0.11 |
| <i>T. rosea</i> | NKXS01004838.1 | 2406   | 0.11 |
| <i>T. rosea</i> | NKXS01004852.1 | 985    | 0.11 |
| <i>T. rosea</i> | NKXS01004852.1 | 1103   | 0.11 |
| <i>T. rosea</i> | NKXS01005001.1 | 22874  | 0.11 |
| <i>T. rosea</i> | NKXS01005274.1 | 19104  | 0.11 |
| <i>T. rosea</i> | NKXS01005274.1 | 19123  | 0.11 |
| <i>T. rosea</i> | NKXS01005274.1 | 19230  | 0.11 |
| <i>T. rosea</i> | NKXS01005274.1 | 19252  | 0.11 |
| <i>T. rosea</i> | NKXS01005329.1 | 53514  | 0.11 |
| <i>T. rosea</i> | NKXS01005330.1 | 19681  | 0.11 |
| <i>T. rosea</i> | NKXS01005646.1 | 67300  | 0.11 |
| <i>T. rosea</i> | NKXS01005690.1 | 23476  | 0.11 |
| <i>T. rosea</i> | NKXS01005690.1 | 23489  | 0.11 |
| <i>T. rosea</i> | NKXS01005697.1 | 60498  | 0.11 |
| <i>T. rosea</i> | NKXS01005744.1 | 10310  | 0.11 |
| <i>T. rosea</i> | NKXS01005915.1 | 8642   | 0.11 |
| <i>T. rosea</i> | NKXS01005915.1 | 8734   | 0.11 |
| <i>T. rosea</i> | NKXS01006232.1 | 47226  | 0.11 |
| <i>T. rosea</i> | NKXS01006250.1 | 16951  | 0.11 |
| <i>T. rosea</i> | NKXS01006364.1 | 20100  | 0.11 |
| <i>T. rosea</i> | NKXS01006413.1 | 8152   | 0.11 |
| <i>T. rosea</i> | NKXS01006413.1 | 8253   | 0.11 |
| <i>T. rosea</i> | NKXS01006438.1 | 29525  | 0.11 |
| <i>T. rosea</i> | NKXS01006474.1 | 26260  | 0.11 |
| <i>T. rosea</i> | NKXS01006479.1 | 34383  | 0.11 |

|                 |                |       |      |
|-----------------|----------------|-------|------|
| <i>T. rosea</i> | NKXS01006487.1 | 1157  | 0.11 |
| <i>T. rosea</i> | NKXS01006506.1 | 4826  | 0.11 |
| <i>T. rosea</i> | NKXS01006752.1 | 5581  | 0.11 |
| <i>T. rosea</i> | NKXS01006778.1 | 24962 | 0.11 |
| <i>T. rosea</i> | NKXS01007210.1 | 25059 | 0.11 |
| <i>T. rosea</i> | NKXS01007210.1 | 25084 | 0.11 |
| <i>T. rosea</i> | NKXS01007210.1 | 25153 | 0.11 |
| <i>T. rosea</i> | NKXS01007543.1 | 9114  | 0.11 |
| <i>T. rosea</i> | NKXS01007543.1 | 9133  | 0.11 |
| <i>T. rosea</i> | NKXS01007825.1 | 5535  | 0.11 |
| <i>T. rosea</i> | NKXS01007825.1 | 5541  | 0.11 |
| <i>T. rosea</i> | NKXS01007825.1 | 5567  | 0.11 |
| <i>T. rosea</i> | NKXS01007825.1 | 5581  | 0.11 |
| <i>T. rosea</i> | NKXS01007825.1 | 5596  | 0.11 |
| <i>T. rosea</i> | NKXS01007825.1 | 5626  | 0.11 |
| <i>T. rosea</i> | NKXS01007825.1 | 5655  | 0.11 |
| <i>T. rosea</i> | NKXS01007969.1 | 13054 | 0.11 |
| <i>T. rosea</i> | NKXS01007969.1 | 13080 | 0.11 |
| <i>T. rosea</i> | NKXS01007972.1 | 18209 | 0.11 |
| <i>T. rosea</i> | NKXS01007972.1 | 18216 | 0.11 |
| <i>T. rosea</i> | NKXS01007972.1 | 18294 | 0.11 |
| <i>T. rosea</i> | NKXS01007972.1 | 18338 | 0.11 |
| <i>T. rosea</i> | NKXS01008072.1 | 11061 | 0.11 |
| <i>T. rosea</i> | NKXS01008197.1 | 13659 | 0.11 |
| <i>T. rosea</i> | NKXS01008263.1 | 38078 | 0.11 |
| <i>T. rosea</i> | NKXS01008424.1 | 12654 | 0.11 |
| <i>T. rosea</i> | NKXS01008820.1 | 8077  | 0.11 |
| <i>T. rosea</i> | NKXS01008945.1 | 2067  | 0.11 |
| <i>T. rosea</i> | NKXS01009487.1 | 556   | 0.11 |
| <i>T. rosea</i> | NKXS01009757.1 | 2236  | 0.11 |
| <i>T. rosea</i> | NKXS01009959.1 | 2845  | 0.11 |
| <i>T. rosea</i> | NKXS01012054.1 | 442   | 0.11 |

---
