# Supplementary material for: Identification of Commercial Cultivars in the Tabebuia Alliance Using Genotyping-by-Sequencing
Source: MDPI journal article supplement (doi:10.3390/f14020271), 2023-01-31
Supplement: s1 [file s1]

**Table S5.** High-quality loci could be used for distinguish cultivar in *H. heptaphyllum*

| Species                | Scaffolds      | Position | Rate of no-majority genotype |
|------------------------|----------------|----------|------------------------------|
| <i>H. heptaphyllum</i> | NKXS01000105.1 | 15179    | 0.60                         |
| <i>H. heptaphyllum</i> | NKXS01000384.1 | 86916    | 0.60                         |
| <i>H. heptaphyllum</i> | NKXS01000464.1 | 195288   | 0.60                         |
| <i>H. heptaphyllum</i> | NKXS01000464.1 | 195407   | 0.60                         |
| <i>H. heptaphyllum</i> | NKXS01000464.1 | 195419   | 0.60                         |
| <i>H. heptaphyllum</i> | NKXS01000559.1 | 50110    | 0.60                         |
| <i>H. heptaphyllum</i> | NKXS01000744.1 | 29896    | 0.60                         |
| <i>H. heptaphyllum</i> | NKXS01000744.1 | 29987    | 0.60                         |
| <i>H. heptaphyllum</i> | NKXS01001051.1 | 68698    | 0.60                         |
| <i>H. heptaphyllum</i> | NKXS01001051.1 | 68704    | 0.60                         |
| <i>H. heptaphyllum</i> | NKXS01001051.1 | 72217    | 0.60                         |
| <i>H. heptaphyllum</i> | NKXS01001068.1 | 81644    | 0.60                         |
| <i>H. heptaphyllum</i> | NKXS01001164.1 | 31966    | 0.60                         |
| <i>H. heptaphyllum</i> | NKXS01001187.1 | 91225    | 0.60                         |
| <i>H. heptaphyllum</i> | NKXS01001187.1 | 91241    | 0.60                         |
| <i>H. heptaphyllum</i> | NKXS01001187.1 | 91318    | 0.60                         |
| <i>H. heptaphyllum</i> | NKXS01001289.1 | 3972     | 0.60                         |
| <i>H. heptaphyllum</i> | NKXS01001307.1 | 22804    | 0.60                         |
| <i>H. heptaphyllum</i> | NKXS01001614.1 | 9529     | 0.60                         |
| <i>H. heptaphyllum</i> | NKXS01001773.1 | 11589    | 0.60                         |
| <i>H. heptaphyllum</i> | NKXS01001899.1 | 108684   | 0.60                         |
| <i>H. heptaphyllum</i> | NKXS01001899.1 | 108712   | 0.60                         |
| <i>H. heptaphyllum</i> | NKXS01002016.1 | 91270    | 0.60                         |
| <i>H. heptaphyllum</i> | NKXS01002016.1 | 91354    | 0.60                         |
| <i>H. heptaphyllum</i> | NKXS01002038.1 | 4838     | 0.60                         |
| <i>H. heptaphyllum</i> | NKXS01002399.1 | 118110   | 0.60                         |
| <i>H. heptaphyllum</i> | NKXS01002484.1 | 22022    | 0.60                         |
| <i>H. heptaphyllum</i> | NKXS01002529.1 | 43579    | 0.60                         |
| <i>H. heptaphyllum</i> | NKXS01002828.1 | 119626   | 0.60                         |
| <i>H. heptaphyllum</i> | NKXS01002828.1 | 119648   | 0.60                         |
| <i>H. heptaphyllum</i> | NKXS01002966.1 | 37903    | 0.60                         |
| <i>H. heptaphyllum</i> | NKXS01002966.1 | 37960    | 0.60                         |
| <i>H. heptaphyllum</i> | NKXS01003239.1 | 37430    | 0.60                         |
| <i>H. heptaphyllum</i> | NKXS01003239.1 | 37458    | 0.60                         |
| <i>H. heptaphyllum</i> | NKXS01003239.1 | 37548    | 0.60                         |
| <i>H. heptaphyllum</i> | NKXS01003281.1 | 79761    | 0.60                         |
| <i>H. heptaphyllum</i> | NKXS01003344.1 | 24368    | 0.60                         |
| <i>H. heptaphyllum</i> | NKXS01003344.1 | 24627    | 0.60                         |
| <i>H. heptaphyllum</i> | NKXS01003418.1 | 65423    | 0.60                         |
| <i>H. heptaphyllum</i> | NKXS01003474.1 | 55976    | 0.60                         |
| <i>H. heptaphyllum</i> | NKXS01003533.1 | 76587    | 0.60                         |

|                        |                |       |      |
|------------------------|----------------|-------|------|
| <i>H. heptaphyllus</i> | NKXS01003712.1 | 33657 | 0.60 |
| <i>H. heptaphyllus</i> | NKXS01003712.1 | 33784 | 0.60 |
| <i>H. heptaphyllus</i> | NKXS01003823.1 | 15047 | 0.60 |
| <i>H. heptaphyllus</i> | NKXS01003823.1 | 44727 | 0.60 |
| <i>H. heptaphyllus</i> | NKXS01003845.1 | 49215 | 0.60 |
| <i>H. heptaphyllus</i> | NKXS01003845.1 | 49222 | 0.60 |
| <i>H. heptaphyllus</i> | NKXS01003845.1 | 49257 | 0.60 |
| <i>H. heptaphyllus</i> | NKXS01003845.1 | 49304 | 0.60 |
| <i>H. heptaphyllus</i> | NKXS01003845.1 | 49315 | 0.60 |
| <i>H. heptaphyllus</i> | NKXS01003845.1 | 49333 | 0.60 |
| <i>H. heptaphyllus</i> | NKXS01003845.1 | 49344 | 0.60 |
| <i>H. heptaphyllus</i> | NKXS01003845.1 | 49347 | 0.60 |
| <i>H. heptaphyllus</i> | NKXS01003845.1 | 49396 | 0.60 |
| <i>H. heptaphyllus</i> | NKXS01003845.1 | 49431 | 0.60 |
| <i>H. heptaphyllus</i> | NKXS01003845.1 | 49456 | 0.60 |
| <i>H. heptaphyllus</i> | NKXS01003982.1 | 17647 | 0.60 |
| <i>H. heptaphyllus</i> | NKXS01003982.1 | 17700 | 0.60 |
| <i>H. heptaphyllus</i> | NKXS01004283.1 | 63291 | 0.60 |
| <i>H. heptaphyllus</i> | NKXS01004312.1 | 1123  | 0.60 |
| <i>H. heptaphyllus</i> | NKXS01004437.1 | 14761 | 0.60 |
| <i>H. heptaphyllus</i> | NKXS01004449.1 | 41595 | 0.60 |
| <i>H. heptaphyllus</i> | NKXS01004485.1 | 30069 | 0.60 |
| <i>H. heptaphyllus</i> | NKXS01004513.1 | 34083 | 0.60 |
| <i>H. heptaphyllus</i> | NKXS01004513.1 | 34087 | 0.60 |
| <i>H. heptaphyllus</i> | NKXS01004837.1 | 19756 | 0.60 |
| <i>H. heptaphyllus</i> | NKXS01005209.1 | 1208  | 0.60 |
| <i>H. heptaphyllus</i> | NKXS01005365.1 | 10787 | 0.60 |
| <i>H. heptaphyllus</i> | NKXS01005365.1 | 10806 | 0.60 |
| <i>H. heptaphyllus</i> | NKXS01005595.1 | 20402 | 0.60 |
| <i>H. heptaphyllus</i> | NKXS01006004.1 | 13552 | 0.60 |
| <i>H. heptaphyllus</i> | NKXS01006004.1 | 13660 | 0.60 |
| <i>H. heptaphyllus</i> | NKXS01006277.1 | 5818  | 0.60 |
| <i>H. heptaphyllus</i> | NKXS01006549.1 | 17730 | 0.60 |
| <i>H. heptaphyllus</i> | NKXS01006632.1 | 26653 | 0.60 |
| <i>H. heptaphyllus</i> | NKXS01007685.1 | 16189 | 0.60 |
| <i>H. heptaphyllus</i> | NKXS01008001.1 | 8372  | 0.60 |
| <i>H. heptaphyllus</i> | NKXS01008001.1 | 8420  | 0.60 |
| <i>H. heptaphyllus</i> | NKXS01008034.1 | 13674 | 0.60 |
| <i>H. heptaphyllus</i> | NKXS01008234.1 | 3838  | 0.60 |
| <i>H. heptaphyllus</i> | NKXS01008234.1 | 3841  | 0.60 |
| <i>H. heptaphyllus</i> | NKXS01008318.1 | 10734 | 0.60 |
| <i>H. heptaphyllus</i> | NKXS01008955.1 | 13866 | 0.60 |
| <i>H. heptaphyllus</i> | NKXS01008985.1 | 9793  | 0.60 |
| <i>H. heptaphyllus</i> | NKXS01012069.1 | 755   | 0.60 |

|                        |                |        |      |
|------------------------|----------------|--------|------|
| <i>H. heptaphyllus</i> | NKXS01000006.1 | 31277  | 0.40 |
| <i>H. heptaphyllus</i> | NKXS01000006.1 | 31305  | 0.40 |
| <i>H. heptaphyllus</i> | NKXS01000006.1 | 31429  | 0.40 |
| <i>H. heptaphyllus</i> | NKXS01000015.1 | 30706  | 0.40 |
| <i>H. heptaphyllus</i> | NKXS01000017.1 | 89817  | 0.40 |
| <i>H. heptaphyllus</i> | NKXS01000017.1 | 89863  | 0.40 |
| <i>H. heptaphyllus</i> | NKXS01000017.1 | 192129 | 0.40 |
| <i>H. heptaphyllus</i> | NKXS01000021.1 | 211412 | 0.40 |
| <i>H. heptaphyllus</i> | NKXS01000025.1 | 207557 | 0.40 |
| <i>H. heptaphyllus</i> | NKXS01000030.1 | 357704 | 0.40 |
| <i>H. heptaphyllus</i> | NKXS01000030.1 | 357894 | 0.40 |
| <i>H. heptaphyllus</i> | NKXS01000041.1 | 281525 | 0.40 |
| <i>H. heptaphyllus</i> | NKXS01000050.1 | 217666 | 0.40 |
| <i>H. heptaphyllus</i> | NKXS01000050.1 | 217674 | 0.40 |
| <i>H. heptaphyllus</i> | NKXS01000050.1 | 217733 | 0.40 |
| <i>H. heptaphyllus</i> | NKXS01000050.1 | 217734 | 0.40 |
| <i>H. heptaphyllus</i> | NKXS01000051.1 | 215742 | 0.40 |
| <i>H. heptaphyllus</i> | NKXS01000051.1 | 215780 | 0.40 |
| <i>H. heptaphyllus</i> | NKXS01000065.1 | 69869  | 0.40 |
| <i>H. heptaphyllus</i> | NKXS01000065.1 | 69968  | 0.40 |
| <i>H. heptaphyllus</i> | NKXS01000065.1 | 70003  | 0.40 |
| <i>H. heptaphyllus</i> | NKXS01000075.1 | 46520  | 0.40 |
| <i>H. heptaphyllus</i> | NKXS01000075.1 | 49500  | 0.40 |
| <i>H. heptaphyllus</i> | NKXS01000079.1 | 38101  | 0.40 |
| <i>H. heptaphyllus</i> | NKXS01000087.1 | 14606  | 0.40 |
| <i>H. heptaphyllus</i> | NKXS01000087.1 | 14802  | 0.40 |
| <i>H. heptaphyllus</i> | NKXS01000090.1 | 83563  | 0.40 |
| <i>H. heptaphyllus</i> | NKXS01000090.1 | 83682  | 0.40 |
| <i>H. heptaphyllus</i> | NKXS01000090.1 | 83721  | 0.40 |
| <i>H. heptaphyllus</i> | NKXS01000094.1 | 184648 | 0.40 |
| <i>H. heptaphyllus</i> | NKXS01000097.1 | 67670  | 0.40 |
| <i>H. heptaphyllus</i> | NKXS01000097.1 | 154784 | 0.40 |
| <i>H. heptaphyllus</i> | NKXS01000097.1 | 156486 | 0.40 |
| <i>H. heptaphyllus</i> | NKXS01000098.1 | 27758  | 0.40 |
| <i>H. heptaphyllus</i> | NKXS01000102.1 | 85372  | 0.40 |
| <i>H. heptaphyllus</i> | NKXS01000123.1 | 156777 | 0.40 |
| <i>H. heptaphyllus</i> | NKXS01000123.1 | 156809 | 0.40 |
| <i>H. heptaphyllus</i> | NKXS01000123.1 | 156811 | 0.40 |
| <i>H. heptaphyllus</i> | NKXS01000128.1 | 43819  | 0.40 |
| <i>H. heptaphyllus</i> | NKXS01000132.1 | 19172  | 0.40 |
| <i>H. heptaphyllus</i> | NKXS01000138.1 | 18237  | 0.40 |
| <i>H. heptaphyllus</i> | NKXS01000149.1 | 95648  | 0.40 |
| <i>H. heptaphyllus</i> | NKXS01000149.1 | 101778 | 0.40 |
| <i>H. heptaphyllus</i> | NKXS01000155.1 | 94343  | 0.40 |

|                        |                |        |      |
|------------------------|----------------|--------|------|
| <i>H. heptaphyllus</i> | NKXS01000160.1 | 148579 | 0.40 |
| <i>H. heptaphyllus</i> | NKXS01000160.1 | 219631 | 0.40 |
| <i>H. heptaphyllus</i> | NKXS01000164.1 | 326020 | 0.40 |
| <i>H. heptaphyllus</i> | NKXS01000164.1 | 326158 | 0.40 |
| <i>H. heptaphyllus</i> | NKXS01000167.1 | 198873 | 0.40 |
| <i>H. heptaphyllus</i> | NKXS01000168.1 | 42151  | 0.40 |
| <i>H. heptaphyllus</i> | NKXS01000168.1 | 42183  | 0.40 |
| <i>H. heptaphyllus</i> | NKXS01000175.1 | 79604  | 0.40 |
| <i>H. heptaphyllus</i> | NKXS01000175.1 | 79619  | 0.40 |
| <i>H. heptaphyllus</i> | NKXS01000180.1 | 201683 | 0.40 |
| <i>H. heptaphyllus</i> | NKXS01000180.1 | 201696 | 0.40 |
| <i>H. heptaphyllus</i> | NKXS01000181.1 | 128707 | 0.40 |
| <i>H. heptaphyllus</i> | NKXS01000181.1 | 128721 | 0.40 |
| <i>H. heptaphyllus</i> | NKXS01000186.1 | 25703  | 0.40 |
| <i>H. heptaphyllus</i> | NKXS01000188.1 | 243196 | 0.40 |
| <i>H. heptaphyllus</i> | NKXS01000188.1 | 304135 | 0.40 |
| <i>H. heptaphyllus</i> | NKXS01000188.1 | 304206 | 0.40 |
| <i>H. heptaphyllus</i> | NKXS01000189.1 | 123652 | 0.40 |
| <i>H. heptaphyllus</i> | NKXS01000189.1 | 129557 | 0.40 |
| <i>H. heptaphyllus</i> | NKXS01000199.1 | 95795  | 0.40 |
| <i>H. heptaphyllus</i> | NKXS01000204.1 | 92889  | 0.40 |
| <i>H. heptaphyllus</i> | NKXS01000218.1 | 110424 | 0.40 |
| <i>H. heptaphyllus</i> | NKXS01000218.1 | 210196 | 0.40 |
| <i>H. heptaphyllus</i> | NKXS01000227.1 | 140371 | 0.40 |
| <i>H. heptaphyllus</i> | NKXS01000227.1 | 140427 | 0.40 |
| <i>H. heptaphyllus</i> | NKXS01000227.1 | 140527 | 0.40 |
| <i>H. heptaphyllus</i> | NKXS01000241.1 | 186116 | 0.40 |
| <i>H. heptaphyllus</i> | NKXS01000241.1 | 192805 | 0.40 |
| <i>H. heptaphyllus</i> | NKXS01000243.1 | 87470  | 0.40 |
| <i>H. heptaphyllus</i> | NKXS01000249.1 | 102079 | 0.40 |
| <i>H. heptaphyllus</i> | NKXS01000253.1 | 99246  | 0.40 |
| <i>H. heptaphyllus</i> | NKXS01000259.1 | 45655  | 0.40 |
| <i>H. heptaphyllus</i> | NKXS01000278.1 | 104443 | 0.40 |
| <i>H. heptaphyllus</i> | NKXS01000278.1 | 104473 | 0.40 |
| <i>H. heptaphyllus</i> | NKXS01000278.1 | 104524 | 0.40 |
| <i>H. heptaphyllus</i> | NKXS01000278.1 | 104554 | 0.40 |
| <i>H. heptaphyllus</i> | NKXS01000278.1 | 104642 | 0.40 |
| <i>H. heptaphyllus</i> | NKXS01000278.1 | 104654 | 0.40 |
| <i>H. heptaphyllus</i> | NKXS01000287.1 | 146609 | 0.40 |
| <i>H. heptaphyllus</i> | NKXS01000288.1 | 125014 | 0.40 |
| <i>H. heptaphyllus</i> | NKXS01000290.1 | 129153 | 0.40 |
| <i>H. heptaphyllus</i> | NKXS01000290.1 | 129326 | 0.40 |
| <i>H. heptaphyllus</i> | NKXS01000298.1 | 171768 | 0.40 |
| <i>H. heptaphyllus</i> | NKXS01000303.1 | 2527   | 0.40 |

|                        |                |        |      |
|------------------------|----------------|--------|------|
| <i>H. heptaphyllus</i> | NKXS01000304.1 | 89069  | 0.40 |
| <i>H. heptaphyllus</i> | NKXS01000304.1 | 89176  | 0.40 |
| <i>H. heptaphyllus</i> | NKXS01000316.1 | 15538  | 0.40 |
| <i>H. heptaphyllus</i> | NKXS01000321.1 | 131911 | 0.40 |
| <i>H. heptaphyllus</i> | NKXS01000321.1 | 131920 | 0.40 |
| <i>H. heptaphyllus</i> | NKXS01000324.1 | 30902  | 0.40 |
| <i>H. heptaphyllus</i> | NKXS01000324.1 | 30942  | 0.40 |
| <i>H. heptaphyllus</i> | NKXS01000325.1 | 79375  | 0.40 |
| <i>H. heptaphyllus</i> | NKXS01000325.1 | 79451  | 0.40 |
| <i>H. heptaphyllus</i> | NKXS01000327.1 | 39317  | 0.40 |
| <i>H. heptaphyllus</i> | NKXS01000327.1 | 39362  | 0.40 |
| <i>H. heptaphyllus</i> | NKXS01000339.1 | 179624 | 0.40 |
| <i>H. heptaphyllus</i> | NKXS01000343.1 | 194629 | 0.40 |
| <i>H. heptaphyllus</i> | NKXS01000344.1 | 148929 | 0.40 |
| <i>H. heptaphyllus</i> | NKXS01000353.1 | 4181   | 0.40 |
| <i>H. heptaphyllus</i> | NKXS01000360.1 | 141633 | 0.40 |
| <i>H. heptaphyllus</i> | NKXS01000364.1 | 110880 | 0.40 |
| <i>H. heptaphyllus</i> | NKXS01000364.1 | 110959 | 0.40 |
| <i>H. heptaphyllus</i> | NKXS01000364.1 | 111002 | 0.40 |
| <i>H. heptaphyllus</i> | NKXS01000364.1 | 111037 | 0.40 |
| <i>H. heptaphyllus</i> | NKXS01000371.1 | 101258 | 0.40 |
| <i>H. heptaphyllus</i> | NKXS01000382.1 | 194146 | 0.40 |
| <i>H. heptaphyllus</i> | NKXS01000383.1 | 100563 | 0.40 |
| <i>H. heptaphyllus</i> | NKXS01000383.1 | 100579 | 0.40 |
| <i>H. heptaphyllus</i> | NKXS01000383.1 | 100680 | 0.40 |
| <i>H. heptaphyllus</i> | NKXS01000393.1 | 45133  | 0.40 |
| <i>H. heptaphyllus</i> | NKXS01000397.1 | 193    | 0.40 |
| <i>H. heptaphyllus</i> | NKXS01000397.1 | 280    | 0.40 |
| <i>H. heptaphyllus</i> | NKXS01000402.1 | 64355  | 0.40 |
| <i>H. heptaphyllus</i> | NKXS01000402.1 | 64362  | 0.40 |
| <i>H. heptaphyllus</i> | NKXS01000402.1 | 64394  | 0.40 |
| <i>H. heptaphyllus</i> | NKXS01000402.1 | 64395  | 0.40 |
| <i>H. heptaphyllus</i> | NKXS01000402.1 | 64410  | 0.40 |
| <i>H. heptaphyllus</i> | NKXS01000402.1 | 64437  | 0.40 |
| <i>H. heptaphyllus</i> | NKXS01000410.1 | 47465  | 0.40 |
| <i>H. heptaphyllus</i> | NKXS01000419.1 | 156442 | 0.40 |
| <i>H. heptaphyllus</i> | NKXS01000421.1 | 120737 | 0.40 |
| <i>H. heptaphyllus</i> | NKXS01000421.1 | 120769 | 0.40 |
| <i>H. heptaphyllus</i> | NKXS01000421.1 | 120773 | 0.40 |
| <i>H. heptaphyllus</i> | NKXS01000421.1 | 120774 | 0.40 |
| <i>H. heptaphyllus</i> | NKXS01000421.1 | 120895 | 0.40 |
| <i>H. heptaphyllus</i> | NKXS01000421.1 | 120899 | 0.40 |
| <i>H. heptaphyllus</i> | NKXS01000421.1 | 120913 | 0.40 |
| <i>H. heptaphyllus</i> | NKXS01000421.1 | 120959 | 0.40 |

|                        |                |        |      |
|------------------------|----------------|--------|------|
| <i>H. heptaphyllus</i> | NKXS01000421.1 | 120971 | 0.40 |
| <i>H. heptaphyllus</i> | NKXS01000421.1 | 121003 | 0.40 |
| <i>H. heptaphyllus</i> | NKXS01000433.1 | 22532  | 0.40 |
| <i>H. heptaphyllus</i> | NKXS01000433.1 | 22562  | 0.40 |
| <i>H. heptaphyllus</i> | NKXS01000443.1 | 75202  | 0.40 |
| <i>H. heptaphyllus</i> | NKXS01000450.1 | 15150  | 0.40 |
| <i>H. heptaphyllus</i> | NKXS01000455.1 | 123775 | 0.40 |
| <i>H. heptaphyllus</i> | NKXS01000455.1 | 123777 | 0.40 |
| <i>H. heptaphyllus</i> | NKXS01000455.1 | 123812 | 0.40 |
| <i>H. heptaphyllus</i> | NKXS01000458.1 | 79194  | 0.40 |
| <i>H. heptaphyllus</i> | NKXS01000464.1 | 195310 | 0.40 |
| <i>H. heptaphyllus</i> | NKXS01000474.1 | 165581 | 0.40 |
| <i>H. heptaphyllus</i> | NKXS01000477.1 | 69339  | 0.40 |
| <i>H. heptaphyllus</i> | NKXS01000481.1 | 89200  | 0.40 |
| <i>H. heptaphyllus</i> | NKXS01000481.1 | 89319  | 0.40 |
| <i>H. heptaphyllus</i> | NKXS01000481.1 | 89375  | 0.40 |
| <i>H. heptaphyllus</i> | NKXS01000481.1 | 89382  | 0.40 |
| <i>H. heptaphyllus</i> | NKXS01000481.1 | 89419  | 0.40 |
| <i>H. heptaphyllus</i> | NKXS01000487.1 | 106929 | 0.40 |
| <i>H. heptaphyllus</i> | NKXS01000488.1 | 90128  | 0.40 |
| <i>H. heptaphyllus</i> | NKXS01000494.1 | 29663  | 0.40 |
| <i>H. heptaphyllus</i> | NKXS01000494.1 | 29665  | 0.40 |
| <i>H. heptaphyllus</i> | NKXS01000494.1 | 29713  | 0.40 |
| <i>H. heptaphyllus</i> | NKXS01000503.1 | 68502  | 0.40 |
| <i>H. heptaphyllus</i> | NKXS01000515.1 | 150272 | 0.40 |
| <i>H. heptaphyllus</i> | NKXS01000515.1 | 150304 | 0.40 |
| <i>H. heptaphyllus</i> | NKXS01000515.1 | 150305 | 0.40 |
| <i>H. heptaphyllus</i> | NKXS01000515.1 | 150368 | 0.40 |
| <i>H. heptaphyllus</i> | NKXS01000515.1 | 150378 | 0.40 |
| <i>H. heptaphyllus</i> | NKXS01000517.1 | 130126 | 0.40 |
| <i>H. heptaphyllus</i> | NKXS01000517.1 | 130199 | 0.40 |
| <i>H. heptaphyllus</i> | NKXS01000520.1 | 111177 | 0.40 |
| <i>H. heptaphyllus</i> | NKXS01000521.1 | 4914   | 0.40 |
| <i>H. heptaphyllus</i> | NKXS01000556.1 | 71504  | 0.40 |
| <i>H. heptaphyllus</i> | NKXS01000556.1 | 71587  | 0.40 |
| <i>H. heptaphyllus</i> | NKXS01000558.1 | 204981 | 0.40 |
| <i>H. heptaphyllus</i> | NKXS01000562.1 | 56550  | 0.40 |
| <i>H. heptaphyllus</i> | NKXS01000562.1 | 56583  | 0.40 |
| <i>H. heptaphyllus</i> | NKXS01000562.1 | 56637  | 0.40 |
| <i>H. heptaphyllus</i> | NKXS01000562.1 | 56657  | 0.40 |
| <i>H. heptaphyllus</i> | NKXS01000562.1 | 56672  | 0.40 |
| <i>H. heptaphyllus</i> | NKXS01000562.1 | 56706  | 0.40 |
| <i>H. heptaphyllus</i> | NKXS01000562.1 | 56720  | 0.40 |
| <i>H. heptaphyllus</i> | NKXS01000562.1 | 56760  | 0.40 |

|                        |                |        |      |
|------------------------|----------------|--------|------|
| <i>H. heptaphyllus</i> | NKXS01000568.1 | 93971  | 0.40 |
| <i>H. heptaphyllus</i> | NKXS01000576.1 | 80026  | 0.40 |
| <i>H. heptaphyllus</i> | NKXS01000581.1 | 128821 | 0.40 |
| <i>H. heptaphyllus</i> | NKXS01000582.1 | 68569  | 0.40 |
| <i>H. heptaphyllus</i> | NKXS01000584.1 | 9457   | 0.40 |
| <i>H. heptaphyllus</i> | NKXS01000584.1 | 9519   | 0.40 |
| <i>H. heptaphyllus</i> | NKXS01000585.1 | 272154 | 0.40 |
| <i>H. heptaphyllus</i> | NKXS01000586.1 | 53925  | 0.40 |
| <i>H. heptaphyllus</i> | NKXS01000595.1 | 24640  | 0.40 |
| <i>H. heptaphyllus</i> | NKXS01000622.1 | 147797 | 0.40 |
| <i>H. heptaphyllus</i> | NKXS01000622.1 | 147847 | 0.40 |
| <i>H. heptaphyllus</i> | NKXS01000622.1 | 151954 | 0.40 |
| <i>H. heptaphyllus</i> | NKXS01000628.1 | 92487  | 0.40 |
| <i>H. heptaphyllus</i> | NKXS01000633.1 | 56099  | 0.40 |
| <i>H. heptaphyllus</i> | NKXS01000649.1 | 86729  | 0.40 |
| <i>H. heptaphyllus</i> | NKXS01000649.1 | 86788  | 0.40 |
| <i>H. heptaphyllus</i> | NKXS01000649.1 | 86817  | 0.40 |
| <i>H. heptaphyllus</i> | NKXS01000654.1 | 39338  | 0.40 |
| <i>H. heptaphyllus</i> | NKXS01000662.1 | 10692  | 0.40 |
| <i>H. heptaphyllus</i> | NKXS01000662.1 | 10701  | 0.40 |
| <i>H. heptaphyllus</i> | NKXS01000662.1 | 10725  | 0.40 |
| <i>H. heptaphyllus</i> | NKXS01000662.1 | 79510  | 0.40 |
| <i>H. heptaphyllus</i> | NKXS01000662.1 | 79529  | 0.40 |
| <i>H. heptaphyllus</i> | NKXS01000662.1 | 79561  | 0.40 |
| <i>H. heptaphyllus</i> | NKXS01000662.1 | 136191 | 0.40 |
| <i>H. heptaphyllus</i> | NKXS01000662.1 | 137452 | 0.40 |
| <i>H. heptaphyllus</i> | NKXS01000697.1 | 42953  | 0.40 |
| <i>H. heptaphyllus</i> | NKXS01000709.1 | 29640  | 0.40 |
| <i>H. heptaphyllus</i> | NKXS01000709.1 | 29720  | 0.40 |
| <i>H. heptaphyllus</i> | NKXS01000709.1 | 29737  | 0.40 |
| <i>H. heptaphyllus</i> | NKXS01000709.1 | 29757  | 0.40 |
| <i>H. heptaphyllus</i> | NKXS01000709.1 | 30128  | 0.40 |
| <i>H. heptaphyllus</i> | NKXS01000718.1 | 78205  | 0.40 |
| <i>H. heptaphyllus</i> | NKXS01000718.1 | 78219  | 0.40 |
| <i>H. heptaphyllus</i> | NKXS01000719.1 | 152955 | 0.40 |
| <i>H. heptaphyllus</i> | NKXS01000719.1 | 152981 | 0.40 |
| <i>H. heptaphyllus</i> | NKXS01000719.1 | 152994 | 0.40 |
| <i>H. heptaphyllus</i> | NKXS01000719.1 | 152995 | 0.40 |
| <i>H. heptaphyllus</i> | NKXS01000719.1 | 153025 | 0.40 |
| <i>H. heptaphyllus</i> | NKXS01000719.1 | 153037 | 0.40 |
| <i>H. heptaphyllus</i> | NKXS01000719.1 | 153049 | 0.40 |
| <i>H. heptaphyllus</i> | NKXS01000719.1 | 153116 | 0.40 |
| <i>H. heptaphyllus</i> | NKXS01000719.1 | 153134 | 0.40 |
| <i>H. heptaphyllus</i> | NKXS01000719.1 | 153154 | 0.40 |

|                        |                |        |      |
|------------------------|----------------|--------|------|
| <i>H. heptaphyllus</i> | NKXS01000720.1 | 50376  | 0.40 |
| <i>H. heptaphyllus</i> | NKXS01000720.1 | 50378  | 0.40 |
| <i>H. heptaphyllus</i> | NKXS01000728.1 | 91796  | 0.40 |
| <i>H. heptaphyllus</i> | NKXS01000728.1 | 93663  | 0.40 |
| <i>H. heptaphyllus</i> | NKXS01000734.1 | 69272  | 0.40 |
| <i>H. heptaphyllus</i> | NKXS01000734.1 | 69385  | 0.40 |
| <i>H. heptaphyllus</i> | NKXS01000741.1 | 77701  | 0.40 |
| <i>H. heptaphyllus</i> | NKXS01000744.1 | 29931  | 0.40 |
| <i>H. heptaphyllus</i> | NKXS01000745.1 | 164016 | 0.40 |
| <i>H. heptaphyllus</i> | NKXS01000745.1 | 164059 | 0.40 |
| <i>H. heptaphyllus</i> | NKXS01000745.1 | 164068 | 0.40 |
| <i>H. heptaphyllus</i> | NKXS01000775.1 | 82980  | 0.40 |
| <i>H. heptaphyllus</i> | NKXS01000775.1 | 83035  | 0.40 |
| <i>H. heptaphyllus</i> | NKXS01000775.1 | 83097  | 0.40 |
| <i>H. heptaphyllus</i> | NKXS01000775.1 | 111629 | 0.40 |
| <i>H. heptaphyllus</i> | NKXS01000775.1 | 123112 | 0.40 |
| <i>H. heptaphyllus</i> | NKXS01000775.1 | 123117 | 0.40 |
| <i>H. heptaphyllus</i> | NKXS01000775.1 | 123146 | 0.40 |
| <i>H. heptaphyllus</i> | NKXS01000775.1 | 123239 | 0.40 |
| <i>H. heptaphyllus</i> | NKXS01000775.1 | 123257 | 0.40 |
| <i>H. heptaphyllus</i> | NKXS01000775.1 | 123276 | 0.40 |
| <i>H. heptaphyllus</i> | NKXS01000775.1 | 123322 | 0.40 |
| <i>H. heptaphyllus</i> | NKXS01000775.1 | 123338 | 0.40 |
| <i>H. heptaphyllus</i> | NKXS01000775.1 | 123386 | 0.40 |
| <i>H. heptaphyllus</i> | NKXS01000784.1 | 128018 | 0.40 |
| <i>H. heptaphyllus</i> | NKXS01000788.1 | 52160  | 0.40 |
| <i>H. heptaphyllus</i> | NKXS01000791.1 | 37355  | 0.40 |
| <i>H. heptaphyllus</i> | NKXS01000792.1 | 65353  | 0.40 |
| <i>H. heptaphyllus</i> | NKXS01000792.1 | 65416  | 0.40 |
| <i>H. heptaphyllus</i> | NKXS01000796.1 | 21930  | 0.40 |
| <i>H. heptaphyllus</i> | NKXS01000805.1 | 18189  | 0.40 |
| <i>H. heptaphyllus</i> | NKXS01000852.1 | 102491 | 0.40 |
| <i>H. heptaphyllus</i> | NKXS01000852.1 | 105227 | 0.40 |
| <i>H. heptaphyllus</i> | NKXS01000852.1 | 105238 | 0.40 |
| <i>H. heptaphyllus</i> | NKXS01000852.1 | 105247 | 0.40 |
| <i>H. heptaphyllus</i> | NKXS01000852.1 | 105417 | 0.40 |
| <i>H. heptaphyllus</i> | NKXS01000852.1 | 107284 | 0.40 |
| <i>H. heptaphyllus</i> | NKXS01000852.1 | 107350 | 0.40 |
| <i>H. heptaphyllus</i> | NKXS01000852.1 | 107407 | 0.40 |
| <i>H. heptaphyllus</i> | NKXS01000852.1 | 107471 | 0.40 |
| <i>H. heptaphyllus</i> | NKXS01000852.1 | 110338 | 0.40 |
| <i>H. heptaphyllus</i> | NKXS01000852.1 | 110349 | 0.40 |
| <i>H. heptaphyllus</i> | NKXS01000852.1 | 110382 | 0.40 |
| <i>H. heptaphyllus</i> | NKXS01000852.1 | 110470 | 0.40 |



|                        |                |        |      |
|------------------------|----------------|--------|------|
| <i>H. heptaphyllus</i> | NKXS01000852.1 | 110482 | 0.40 |
| <i>H. heptaphyllus</i> | NKXS01000852.1 | 110517 | 0.40 |
| <i>H. heptaphyllus</i> | NKXS01000852.1 | 110526 | 0.40 |
| <i>H. heptaphyllus</i> | NKXS01000852.1 | 110541 | 0.40 |
| <i>H. heptaphyllus</i> | NKXS01000852.1 | 110557 | 0.40 |
| <i>H. heptaphyllus</i> | NKXS01000852.1 | 118952 | 0.40 |
| <i>H. heptaphyllus</i> | NKXS01000852.1 | 119111 | 0.40 |
| <i>H. heptaphyllus</i> | NKXS01000854.1 | 4743   | 0.40 |
| <i>H. heptaphyllus</i> | NKXS01000863.1 | 130019 | 0.40 |
| <i>H. heptaphyllus</i> | NKXS01000867.1 | 93368  | 0.40 |
| <i>H. heptaphyllus</i> | NKXS01000867.1 | 93379  | 0.40 |
| <i>H. heptaphyllus</i> | NKXS01000867.1 | 95825  | 0.40 |
| <i>H. heptaphyllus</i> | NKXS01000867.1 | 95892  | 0.40 |
| <i>H. heptaphyllus</i> | NKXS01000868.1 | 187106 | 0.40 |
| <i>H. heptaphyllus</i> | NKXS01000868.1 | 187166 | 0.40 |
| <i>H. heptaphyllus</i> | NKXS01000868.1 | 187246 | 0.40 |
| <i>H. heptaphyllus</i> | NKXS01000873.1 | 140732 | 0.40 |
| <i>H. heptaphyllus</i> | NKXS01000877.1 | 142451 | 0.40 |
| <i>H. heptaphyllus</i> | NKXS01000877.1 | 142500 | 0.40 |
| <i>H. heptaphyllus</i> | NKXS01000890.1 | 134305 | 0.40 |
| <i>H. heptaphyllus</i> | NKXS01000893.1 | 75620  | 0.40 |
| <i>H. heptaphyllus</i> | NKXS01000893.1 | 75741  | 0.40 |
| <i>H. heptaphyllus</i> | NKXS01000893.1 | 75751  | 0.40 |
| <i>H. heptaphyllus</i> | NKXS01000893.1 | 75752  | 0.40 |
| <i>H. heptaphyllus</i> | NKXS01000893.1 | 98522  | 0.40 |
| <i>H. heptaphyllus</i> | NKXS01000919.1 | 35131  | 0.40 |
| <i>H. heptaphyllus</i> | NKXS01000936.1 | 76876  | 0.40 |
| <i>H. heptaphyllus</i> | NKXS01000945.1 | 34460  | 0.40 |
| <i>H. heptaphyllus</i> | NKXS01000945.1 | 34532  | 0.40 |
| <i>H. heptaphyllus</i> | NKXS01000945.1 | 54693  | 0.40 |
| <i>H. heptaphyllus</i> | NKXS01000950.1 | 36804  | 0.40 |
| <i>H. heptaphyllus</i> | NKXS01000950.1 | 121346 | 0.40 |
| <i>H. heptaphyllus</i> | NKXS01000952.1 | 53432  | 0.40 |
| <i>H. heptaphyllus</i> | NKXS01000956.1 | 9370   | 0.40 |
| <i>H. heptaphyllus</i> | NKXS01000956.1 | 9374   | 0.40 |
| <i>H. heptaphyllus</i> | NKXS01000956.1 | 9498   | 0.40 |
| <i>H. heptaphyllus</i> | NKXS01000956.1 | 9513   | 0.40 |
| <i>H. heptaphyllus</i> | NKXS01000956.1 | 9595   | 0.40 |
| <i>H. heptaphyllus</i> | NKXS01000959.1 | 21660  | 0.40 |
| <i>H. heptaphyllus</i> | NKXS01000965.1 | 113928 | 0.40 |
| <i>H. heptaphyllus</i> | NKXS01000965.1 | 113996 | 0.40 |
| <i>H. heptaphyllus</i> | NKXS01000965.1 | 114137 | 0.40 |
| <i>H. heptaphyllus</i> | NKXS01000991.1 | 15873  | 0.40 |
| <i>H. heptaphyllus</i> | NKXS01001004.1 | 68313  | 0.40 |

|                        |                |        |      |
|------------------------|----------------|--------|------|
| <i>H. heptaphyllus</i> | NKXS01001004.1 | 68415  | 0.40 |
| <i>H. heptaphyllus</i> | NKXS01001005.1 | 5049   | 0.40 |
| <i>H. heptaphyllus</i> | NKXS01001017.1 | 110581 | 0.40 |
| <i>H. heptaphyllus</i> | NKXS01001017.1 | 110609 | 0.40 |
| <i>H. heptaphyllus</i> | NKXS01001041.1 | 8528   | 0.40 |
| <i>H. heptaphyllus</i> | NKXS01001041.1 | 8540   | 0.40 |
| <i>H. heptaphyllus</i> | NKXS01001041.1 | 8555   | 0.40 |
| <i>H. heptaphyllus</i> | NKXS01001041.1 | 8588   | 0.40 |
| <i>H. heptaphyllus</i> | NKXS01001041.1 | 8668   | 0.40 |
| <i>H. heptaphyllus</i> | NKXS01001041.1 | 8699   | 0.40 |
| <i>H. heptaphyllus</i> | NKXS01001041.1 | 8723   | 0.40 |
| <i>H. heptaphyllus</i> | NKXS01001041.1 | 8757   | 0.40 |
| <i>H. heptaphyllus</i> | NKXS01001041.1 | 8763   | 0.40 |
| <i>H. heptaphyllus</i> | NKXS01001041.1 | 8765   | 0.40 |
| <i>H. heptaphyllus</i> | NKXS01001050.1 | 123826 | 0.40 |
| <i>H. heptaphyllus</i> | NKXS01001055.1 | 2400   | 0.40 |
| <i>H. heptaphyllus</i> | NKXS01001056.1 | 172293 | 0.40 |
| <i>H. heptaphyllus</i> | NKXS01001062.1 | 123097 | 0.40 |
| <i>H. heptaphyllus</i> | NKXS01001062.1 | 123179 | 0.40 |
| <i>H. heptaphyllus</i> | NKXS01001068.1 | 81583  | 0.40 |
| <i>H. heptaphyllus</i> | NKXS01001068.1 | 81679  | 0.40 |
| <i>H. heptaphyllus</i> | NKXS01001074.1 | 17192  | 0.40 |
| <i>H. heptaphyllus</i> | NKXS01001074.1 | 17201  | 0.40 |
| <i>H. heptaphyllus</i> | NKXS01001074.1 | 17251  | 0.40 |
| <i>H. heptaphyllus</i> | NKXS01001074.1 | 17269  | 0.40 |
| <i>H. heptaphyllus</i> | NKXS01001074.1 | 17303  | 0.40 |
| <i>H. heptaphyllus</i> | NKXS01001074.1 | 17322  | 0.40 |
| <i>H. heptaphyllus</i> | NKXS01001082.1 | 31365  | 0.40 |
| <i>H. heptaphyllus</i> | NKXS01001082.1 | 31446  | 0.40 |
| <i>H. heptaphyllus</i> | NKXS01001082.1 | 31511  | 0.40 |
| <i>H. heptaphyllus</i> | NKXS01001085.1 | 39458  | 0.40 |
| <i>H. heptaphyllus</i> | NKXS01001100.1 | 59943  | 0.40 |
| <i>H. heptaphyllus</i> | NKXS01001127.1 | 42849  | 0.40 |
| <i>H. heptaphyllus</i> | NKXS01001127.1 | 45742  | 0.40 |
| <i>H. heptaphyllus</i> | NKXS01001127.1 | 45866  | 0.40 |
| <i>H. heptaphyllus</i> | NKXS01001144.1 | 2644   | 0.40 |
| <i>H. heptaphyllus</i> | NKXS01001150.1 | 121056 | 0.40 |
| <i>H. heptaphyllus</i> | NKXS01001150.1 | 121107 | 0.40 |
| <i>H. heptaphyllus</i> | NKXS01001170.1 | 1039   | 0.40 |
| <i>H. heptaphyllus</i> | NKXS01001171.1 | 68884  | 0.40 |
| <i>H. heptaphyllus</i> | NKXS01001171.1 | 68887  | 0.40 |
| <i>H. heptaphyllus</i> | NKXS01001171.1 | 69083  | 0.40 |
| <i>H. heptaphyllus</i> | NKXS01001180.1 | 13966  | 0.40 |
| <i>H. heptaphyllus</i> | NKXS01001193.1 | 38909  | 0.40 |

|                        |                |        |      |
|------------------------|----------------|--------|------|
| <i>H. heptaphyllus</i> | NKXS01001211.1 | 24675  | 0.40 |
| <i>H. heptaphyllus</i> | NKXS01001211.1 | 24778  | 0.40 |
| <i>H. heptaphyllus</i> | NKXS01001211.1 | 24814  | 0.40 |
| <i>H. heptaphyllus</i> | NKXS01001211.1 | 24840  | 0.40 |
| <i>H. heptaphyllus</i> | NKXS01001212.1 | 172864 | 0.40 |
| <i>H. heptaphyllus</i> | NKXS01001226.1 | 12412  | 0.40 |
| <i>H. heptaphyllus</i> | NKXS01001240.1 | 105006 | 0.40 |
| <i>H. heptaphyllus</i> | NKXS01001252.1 | 93743  | 0.40 |
| <i>H. heptaphyllus</i> | NKXS01001256.1 | 46779  | 0.40 |
| <i>H. heptaphyllus</i> | NKXS01001274.1 | 48380  | 0.40 |
| <i>H. heptaphyllus</i> | NKXS01001274.1 | 48395  | 0.40 |
| <i>H. heptaphyllus</i> | NKXS01001274.1 | 48575  | 0.40 |
| <i>H. heptaphyllus</i> | NKXS01001300.1 | 70135  | 0.40 |
| <i>H. heptaphyllus</i> | NKXS01001301.1 | 127485 | 0.40 |
| <i>H. heptaphyllus</i> | NKXS01001306.1 | 41447  | 0.40 |
| <i>H. heptaphyllus</i> | NKXS01001307.1 | 22694  | 0.40 |
| <i>H. heptaphyllus</i> | NKXS01001307.1 | 22876  | 0.40 |
| <i>H. heptaphyllus</i> | NKXS01001307.1 | 22892  | 0.40 |
| <i>H. heptaphyllus</i> | NKXS01001307.1 | 22953  | 0.40 |
| <i>H. heptaphyllus</i> | NKXS01001307.1 | 93424  | 0.40 |
| <i>H. heptaphyllus</i> | NKXS01001307.1 | 121783 | 0.40 |
| <i>H. heptaphyllus</i> | NKXS01001311.1 | 42442  | 0.40 |
| <i>H. heptaphyllus</i> | NKXS01001323.1 | 5114   | 0.40 |
| <i>H. heptaphyllus</i> | NKXS01001325.1 | 200262 | 0.40 |
| <i>H. heptaphyllus</i> | NKXS01001333.1 | 115584 | 0.40 |
| <i>H. heptaphyllus</i> | NKXS01001333.1 | 115624 | 0.40 |
| <i>H. heptaphyllus</i> | NKXS01001333.1 | 115638 | 0.40 |
| <i>H. heptaphyllus</i> | NKXS01001347.1 | 43696  | 0.40 |
| <i>H. heptaphyllus</i> | NKXS01001347.1 | 47751  | 0.40 |
| <i>H. heptaphyllus</i> | NKXS01001354.1 | 127208 | 0.40 |
| <i>H. heptaphyllus</i> | NKXS01001375.1 | 54648  | 0.40 |
| <i>H. heptaphyllus</i> | NKXS01001423.1 | 85164  | 0.40 |
| <i>H. heptaphyllus</i> | NKXS01001435.1 | 40147  | 0.40 |
| <i>H. heptaphyllus</i> | NKXS01001435.1 | 40285  | 0.40 |
| <i>H. heptaphyllus</i> | NKXS01001435.1 | 40331  | 0.40 |
| <i>H. heptaphyllus</i> | NKXS01001435.1 | 46258  | 0.40 |
| <i>H. heptaphyllus</i> | NKXS01001442.1 | 40150  | 0.40 |
| <i>H. heptaphyllus</i> | NKXS01001442.1 | 40283  | 0.40 |
| <i>H. heptaphyllus</i> | NKXS01001444.1 | 60609  | 0.40 |
| <i>H. heptaphyllus</i> | NKXS01001444.1 | 60737  | 0.40 |
| <i>H. heptaphyllus</i> | NKXS01001445.1 | 49378  | 0.40 |
| <i>H. heptaphyllus</i> | NKXS01001446.1 | 95043  | 0.40 |
| <i>H. heptaphyllus</i> | NKXS01001449.1 | 65940  | 0.40 |
| <i>H. heptaphyllus</i> | NKXS01001449.1 | 66017  | 0.40 |

|                        |                |        |      |
|------------------------|----------------|--------|------|
| <i>H. heptaphyllus</i> | NKXS01001461.1 | 53651  | 0.40 |
| <i>H. heptaphyllus</i> | NKXS01001462.1 | 108105 | 0.40 |
| <i>H. heptaphyllus</i> | NKXS01001464.1 | 41981  | 0.40 |
| <i>H. heptaphyllus</i> | NKXS01001466.1 | 147704 | 0.40 |
| <i>H. heptaphyllus</i> | NKXS01001466.1 | 147707 | 0.40 |
| <i>H. heptaphyllus</i> | NKXS01001466.1 | 147785 | 0.40 |
| <i>H. heptaphyllus</i> | NKXS01001476.1 | 4168   | 0.40 |
| <i>H. heptaphyllus</i> | NKXS01001476.1 | 4247   | 0.40 |
| <i>H. heptaphyllus</i> | NKXS01001476.1 | 4272   | 0.40 |
| <i>H. heptaphyllus</i> | NKXS01001476.1 | 4303   | 0.40 |
| <i>H. heptaphyllus</i> | NKXS01001477.1 | 86310  | 0.40 |
| <i>H. heptaphyllus</i> | NKXS01001491.1 | 2519   | 0.40 |
| <i>H. heptaphyllus</i> | NKXS01001501.1 | 9064   | 0.40 |
| <i>H. heptaphyllus</i> | NKXS01001502.1 | 102568 | 0.40 |
| <i>H. heptaphyllus</i> | NKXS01001503.1 | 21526  | 0.40 |
| <i>H. heptaphyllus</i> | NKXS01001503.1 | 77366  | 0.40 |
| <i>H. heptaphyllus</i> | NKXS01001503.1 | 77408  | 0.40 |
| <i>H. heptaphyllus</i> | NKXS01001503.1 | 77508  | 0.40 |
| <i>H. heptaphyllus</i> | NKXS01001512.1 | 107912 | 0.40 |
| <i>H. heptaphyllus</i> | NKXS01001525.1 | 56965  | 0.40 |
| <i>H. heptaphyllus</i> | NKXS01001525.1 | 57136  | 0.40 |
| <i>H. heptaphyllus</i> | NKXS01001525.1 | 57181  | 0.40 |
| <i>H. heptaphyllus</i> | NKXS01001530.1 | 36889  | 0.40 |
| <i>H. heptaphyllus</i> | NKXS01001530.1 | 36948  | 0.40 |
| <i>H. heptaphyllus</i> | NKXS01001533.1 | 19387  | 0.40 |
| <i>H. heptaphyllus</i> | NKXS01001533.1 | 19427  | 0.40 |
| <i>H. heptaphyllus</i> | NKXS01001533.1 | 19593  | 0.40 |
| <i>H. heptaphyllus</i> | NKXS01001533.1 | 19614  | 0.40 |
| <i>H. heptaphyllus</i> | NKXS01001534.1 | 11173  | 0.40 |
| <i>H. heptaphyllus</i> | NKXS01001534.1 | 11325  | 0.40 |
| <i>H. heptaphyllus</i> | NKXS01001575.1 | 62978  | 0.40 |
| <i>H. heptaphyllus</i> | NKXS01001584.1 | 55180  | 0.40 |
| <i>H. heptaphyllus</i> | NKXS01001584.1 | 101302 | 0.40 |
| <i>H. heptaphyllus</i> | NKXS01001606.1 | 88239  | 0.40 |
| <i>H. heptaphyllus</i> | NKXS01001606.1 | 88311  | 0.40 |
| <i>H. heptaphyllus</i> | NKXS01001606.1 | 88316  | 0.40 |
| <i>H. heptaphyllus</i> | NKXS01001606.1 | 88359  | 0.40 |
| <i>H. heptaphyllus</i> | NKXS01001606.1 | 88440  | 0.40 |
| <i>H. heptaphyllus</i> | NKXS01001606.1 | 95187  | 0.40 |
| <i>H. heptaphyllus</i> | NKXS01001613.1 | 79793  | 0.40 |
| <i>H. heptaphyllus</i> | NKXS01001613.1 | 79814  | 0.40 |
| <i>H. heptaphyllus</i> | NKXS01001637.1 | 22637  | 0.40 |
| <i>H. heptaphyllus</i> | NKXS01001637.1 | 22709  | 0.40 |
| <i>H. heptaphyllus</i> | NKXS01001637.1 | 22767  | 0.40 |

|                        |                |        |      |
|------------------------|----------------|--------|------|
| <i>H. heptaphyllus</i> | NKXS01001639.1 | 5168   | 0.40 |
| <i>H. heptaphyllus</i> | NKXS01001639.1 | 5169   | 0.40 |
| <i>H. heptaphyllus</i> | NKXS01001639.1 | 5198   | 0.40 |
| <i>H. heptaphyllus</i> | NKXS01001639.1 | 5341   | 0.40 |
| <i>H. heptaphyllus</i> | NKXS01001639.1 | 5372   | 0.40 |
| <i>H. heptaphyllus</i> | NKXS01001639.1 | 5386   | 0.40 |
| <i>H. heptaphyllus</i> | NKXS01001642.1 | 76412  | 0.40 |
| <i>H. heptaphyllus</i> | NKXS01001651.1 | 3713   | 0.40 |
| <i>H. heptaphyllus</i> | NKXS01001663.1 | 29428  | 0.40 |
| <i>H. heptaphyllus</i> | NKXS01001668.1 | 11412  | 0.40 |
| <i>H. heptaphyllus</i> | NKXS01001668.1 | 11455  | 0.40 |
| <i>H. heptaphyllus</i> | NKXS01001680.1 | 10079  | 0.40 |
| <i>H. heptaphyllus</i> | NKXS01001687.1 | 71249  | 0.40 |
| <i>H. heptaphyllus</i> | NKXS01001691.1 | 36724  | 0.40 |
| <i>H. heptaphyllus</i> | NKXS01001691.1 | 36731  | 0.40 |
| <i>H. heptaphyllus</i> | NKXS01001691.1 | 72718  | 0.40 |
| <i>H. heptaphyllus</i> | NKXS01001692.1 | 8014   | 0.40 |
| <i>H. heptaphyllus</i> | NKXS01001697.1 | 95277  | 0.40 |
| <i>H. heptaphyllus</i> | NKXS01001701.1 | 62512  | 0.40 |
| <i>H. heptaphyllus</i> | NKXS01001707.1 | 17243  | 0.40 |
| <i>H. heptaphyllus</i> | NKXS01001723.1 | 75765  | 0.40 |
| <i>H. heptaphyllus</i> | NKXS01001723.1 | 75920  | 0.40 |
| <i>H. heptaphyllus</i> | NKXS01001723.1 | 77120  | 0.40 |
| <i>H. heptaphyllus</i> | NKXS01001740.1 | 52438  | 0.40 |
| <i>H. heptaphyllus</i> | NKXS01001744.1 | 77275  | 0.40 |
| <i>H. heptaphyllus</i> | NKXS01001755.1 | 55386  | 0.40 |
| <i>H. heptaphyllus</i> | NKXS01001764.1 | 24213  | 0.40 |
| <i>H. heptaphyllus</i> | NKXS01001772.1 | 106286 | 0.40 |
| <i>H. heptaphyllus</i> | NKXS01001798.1 | 17068  | 0.40 |
| <i>H. heptaphyllus</i> | NKXS01001798.1 | 17071  | 0.40 |
| <i>H. heptaphyllus</i> | NKXS01001798.1 | 17223  | 0.40 |
| <i>H. heptaphyllus</i> | NKXS01001798.1 | 17248  | 0.40 |
| <i>H. heptaphyllus</i> | NKXS01001798.1 | 24116  | 0.40 |
| <i>H. heptaphyllus</i> | NKXS01001826.1 | 130449 | 0.40 |
| <i>H. heptaphyllus</i> | NKXS01001829.1 | 18880  | 0.40 |
| <i>H. heptaphyllus</i> | NKXS01001829.1 | 18962  | 0.40 |
| <i>H. heptaphyllus</i> | NKXS01001843.1 | 16975  | 0.40 |
| <i>H. heptaphyllus</i> | NKXS01001845.1 | 98318  | 0.40 |
| <i>H. heptaphyllus</i> | NKXS01001858.1 | 13832  | 0.40 |
| <i>H. heptaphyllus</i> | NKXS01001860.1 | 53236  | 0.40 |
| <i>H. heptaphyllus</i> | NKXS01001874.1 | 60734  | 0.40 |
| <i>H. heptaphyllus</i> | NKXS01001880.1 | 98551  | 0.40 |
| <i>H. heptaphyllus</i> | NKXS01001880.1 | 98749  | 0.40 |
| <i>H. heptaphyllus</i> | NKXS01001880.1 | 98766  | 0.40 |

|                        |                |        |      |
|------------------------|----------------|--------|------|
| <i>H. heptaphyllus</i> | NKXS01001892.1 | 723    | 0.40 |
| <i>H. heptaphyllus</i> | NKXS01001892.1 | 2410   | 0.40 |
| <i>H. heptaphyllus</i> | NKXS01001892.1 | 2572   | 0.40 |
| <i>H. heptaphyllus</i> | NKXS01001901.1 | 11685  | 0.40 |
| <i>H. heptaphyllus</i> | NKXS01001901.1 | 11833  | 0.40 |
| <i>H. heptaphyllus</i> | NKXS01001904.1 | 114661 | 0.40 |
| <i>H. heptaphyllus</i> | NKXS01001908.1 | 23537  | 0.40 |
| <i>H. heptaphyllus</i> | NKXS01001908.1 | 23568  | 0.40 |
| <i>H. heptaphyllus</i> | NKXS01001916.1 | 12819  | 0.40 |
| <i>H. heptaphyllus</i> | NKXS01001924.1 | 104997 | 0.40 |
| <i>H. heptaphyllus</i> | NKXS01001924.1 | 105099 | 0.40 |
| <i>H. heptaphyllus</i> | NKXS01001924.1 | 105114 | 0.40 |
| <i>H. heptaphyllus</i> | NKXS01001924.1 | 105171 | 0.40 |
| <i>H. heptaphyllus</i> | NKXS01001924.1 | 105181 | 0.40 |
| <i>H. heptaphyllus</i> | NKXS01001924.1 | 105206 | 0.40 |
| <i>H. heptaphyllus</i> | NKXS01001935.1 | 29855  | 0.40 |
| <i>H. heptaphyllus</i> | NKXS01001935.1 | 29898  | 0.40 |
| <i>H. heptaphyllus</i> | NKXS01001962.1 | 88034  | 0.40 |
| <i>H. heptaphyllus</i> | NKXS01001967.1 | 77539  | 0.40 |
| <i>H. heptaphyllus</i> | NKXS01001972.1 | 77391  | 0.40 |
| <i>H. heptaphyllus</i> | NKXS01001984.1 | 53435  | 0.40 |
| <i>H. heptaphyllus</i> | NKXS01001984.1 | 53527  | 0.40 |
| <i>H. heptaphyllus</i> | NKXS01001991.1 | 5160   | 0.40 |
| <i>H. heptaphyllus</i> | NKXS01001991.1 | 5169   | 0.40 |
| <i>H. heptaphyllus</i> | NKXS01001991.1 | 5273   | 0.40 |
| <i>H. heptaphyllus</i> | NKXS01001991.1 | 5402   | 0.40 |
| <i>H. heptaphyllus</i> | NKXS01001995.1 | 81217  | 0.40 |
| <i>H. heptaphyllus</i> | NKXS01002000.1 | 25026  | 0.40 |
| <i>H. heptaphyllus</i> | NKXS01002000.1 | 25031  | 0.40 |
| <i>H. heptaphyllus</i> | NKXS01002000.1 | 25129  | 0.40 |
| <i>H. heptaphyllus</i> | NKXS01002000.1 | 25247  | 0.40 |
| <i>H. heptaphyllus</i> | NKXS01002019.1 | 42942  | 0.40 |
| <i>H. heptaphyllus</i> | NKXS01002038.1 | 4655   | 0.40 |
| <i>H. heptaphyllus</i> | NKXS01002038.1 | 4656   | 0.40 |
| <i>H. heptaphyllus</i> | NKXS01002038.1 | 4702   | 0.40 |
| <i>H. heptaphyllus</i> | NKXS01002038.1 | 4756   | 0.40 |
| <i>H. heptaphyllus</i> | NKXS01002038.1 | 4793   | 0.40 |
| <i>H. heptaphyllus</i> | NKXS01002067.1 | 21803  | 0.40 |
| <i>H. heptaphyllus</i> | NKXS01002067.1 | 21830  | 0.40 |
| <i>H. heptaphyllus</i> | NKXS01002067.1 | 21854  | 0.40 |
| <i>H. heptaphyllus</i> | NKXS01002068.1 | 35606  | 0.40 |
| <i>H. heptaphyllus</i> | NKXS01002070.1 | 47413  | 0.40 |
| <i>H. heptaphyllus</i> | NKXS01002070.1 | 47524  | 0.40 |
| <i>H. heptaphyllus</i> | NKXS01002071.1 | 83476  | 0.40 |

|                        |                |       |      |
|------------------------|----------------|-------|------|
| <i>H. heptaphyllus</i> | NKXS01002102.1 | 39836 | 0.40 |
| <i>H. heptaphyllus</i> | NKXS01002103.1 | 4404  | 0.40 |
| <i>H. heptaphyllus</i> | NKXS01002103.1 | 4502  | 0.40 |
| <i>H. heptaphyllus</i> | NKXS01002103.1 | 4510  | 0.40 |
| <i>H. heptaphyllus</i> | NKXS01002103.1 | 4513  | 0.40 |
| <i>H. heptaphyllus</i> | NKXS01002103.1 | 4589  | 0.40 |
| <i>H. heptaphyllus</i> | NKXS01002112.1 | 22992 | 0.40 |
| <i>H. heptaphyllus</i> | NKXS01002112.1 | 23050 | 0.40 |
| <i>H. heptaphyllus</i> | NKXS01002112.1 | 23068 | 0.40 |
| <i>H. heptaphyllus</i> | NKXS01002112.1 | 23095 | 0.40 |
| <i>H. heptaphyllus</i> | NKXS01002112.1 | 23141 | 0.40 |
| <i>H. heptaphyllus</i> | NKXS01002112.1 | 23157 | 0.40 |
| <i>H. heptaphyllus</i> | NKXS01002112.1 | 23160 | 0.40 |
| <i>H. heptaphyllus</i> | NKXS01002112.1 | 23226 | 0.40 |
| <i>H. heptaphyllus</i> | NKXS01002120.1 | 8814  | 0.40 |
| <i>H. heptaphyllus</i> | NKXS01002133.1 | 33187 | 0.40 |
| <i>H. heptaphyllus</i> | NKXS01002138.1 | 85721 | 0.40 |
| <i>H. heptaphyllus</i> | NKXS01002138.1 | 85743 | 0.40 |
| <i>H. heptaphyllus</i> | NKXS01002139.1 | 2861  | 0.40 |
| <i>H. heptaphyllus</i> | NKXS01002139.1 | 3104  | 0.40 |
| <i>H. heptaphyllus</i> | NKXS01002148.1 | 12333 | 0.40 |
| <i>H. heptaphyllus</i> | NKXS01002148.1 | 15138 | 0.40 |
| <i>H. heptaphyllus</i> | NKXS01002148.1 | 55428 | 0.40 |
| <i>H. heptaphyllus</i> | NKXS01002148.1 | 57162 | 0.40 |
| <i>H. heptaphyllus</i> | NKXS01002166.1 | 77277 | 0.40 |
| <i>H. heptaphyllus</i> | NKXS01002170.1 | 5157  | 0.40 |
| <i>H. heptaphyllus</i> | NKXS01002171.1 | 33857 | 0.40 |
| <i>H. heptaphyllus</i> | NKXS01002184.1 | 93603 | 0.40 |
| <i>H. heptaphyllus</i> | NKXS01002184.1 | 93808 | 0.40 |
| <i>H. heptaphyllus</i> | NKXS01002184.1 | 93851 | 0.40 |
| <i>H. heptaphyllus</i> | NKXS01002190.1 | 44371 | 0.40 |
| <i>H. heptaphyllus</i> | NKXS01002192.1 | 80517 | 0.40 |
| <i>H. heptaphyllus</i> | NKXS01002192.1 | 81106 | 0.40 |
| <i>H. heptaphyllus</i> | NKXS01002192.1 | 81223 | 0.40 |
| <i>H. heptaphyllus</i> | NKXS01002192.1 | 81232 | 0.40 |
| <i>H. heptaphyllus</i> | NKXS01002192.1 | 81243 | 0.40 |
| <i>H. heptaphyllus</i> | NKXS01002192.1 | 81247 | 0.40 |
| <i>H. heptaphyllus</i> | NKXS01002192.1 | 81255 | 0.40 |
| <i>H. heptaphyllus</i> | NKXS01002192.1 | 81273 | 0.40 |
| <i>H. heptaphyllus</i> | NKXS01002192.1 | 81285 | 0.40 |
| <i>H. heptaphyllus</i> | NKXS01002228.1 | 87345 | 0.40 |
| <i>H. heptaphyllus</i> | NKXS01002232.1 | 13259 | 0.40 |
| <i>H. heptaphyllus</i> | NKXS01002237.1 | 11708 | 0.40 |
| <i>H. heptaphyllus</i> | NKXS01002251.1 | 4951  | 0.40 |

|                        |                |        |      |
|------------------------|----------------|--------|------|
| <i>H. heptaphyllus</i> | NKXS01002265.1 | 118715 | 0.40 |
| <i>H. heptaphyllus</i> | NKXS01002284.1 | 31823  | 0.40 |
| <i>H. heptaphyllus</i> | NKXS01002284.1 | 31834  | 0.40 |
| <i>H. heptaphyllus</i> | NKXS01002284.1 | 31852  | 0.40 |
| <i>H. heptaphyllus</i> | NKXS01002284.1 | 31859  | 0.40 |
| <i>H. heptaphyllus</i> | NKXS01002284.1 | 31979  | 0.40 |
| <i>H. heptaphyllus</i> | NKXS01002284.1 | 31980  | 0.40 |
| <i>H. heptaphyllus</i> | NKXS01002288.1 | 14434  | 0.40 |
| <i>H. heptaphyllus</i> | NKXS01002321.1 | 126647 | 0.40 |
| <i>H. heptaphyllus</i> | NKXS01002326.1 | 22164  | 0.40 |
| <i>H. heptaphyllus</i> | NKXS01002327.1 | 37202  | 0.40 |
| <i>H. heptaphyllus</i> | NKXS01002330.1 | 66846  | 0.40 |
| <i>H. heptaphyllus</i> | NKXS01002337.1 | 78017  | 0.40 |
| <i>H. heptaphyllus</i> | NKXS01002364.1 | 10440  | 0.40 |
| <i>H. heptaphyllus</i> | NKXS01002366.1 | 98783  | 0.40 |
| <i>H. heptaphyllus</i> | NKXS01002366.1 | 98993  | 0.40 |
| <i>H. heptaphyllus</i> | NKXS01002366.1 | 99009  | 0.40 |
| <i>H. heptaphyllus</i> | NKXS01002367.1 | 68980  | 0.40 |
| <i>H. heptaphyllus</i> | NKXS01002367.1 | 69016  | 0.40 |
| <i>H. heptaphyllus</i> | NKXS01002367.1 | 69076  | 0.40 |
| <i>H. heptaphyllus</i> | NKXS01002367.1 | 69153  | 0.40 |
| <i>H. heptaphyllus</i> | NKXS01002387.1 | 11059  | 0.40 |
| <i>H. heptaphyllus</i> | NKXS01002387.1 | 11114  | 0.40 |
| <i>H. heptaphyllus</i> | NKXS01002391.1 | 6680   | 0.40 |
| <i>H. heptaphyllus</i> | NKXS01002394.1 | 46326  | 0.40 |
| <i>H. heptaphyllus</i> | NKXS01002396.1 | 10308  | 0.40 |
| <i>H. heptaphyllus</i> | NKXS01002396.1 | 10337  | 0.40 |
| <i>H. heptaphyllus</i> | NKXS01002396.1 | 10462  | 0.40 |
| <i>H. heptaphyllus</i> | NKXS01002401.1 | 56542  | 0.40 |
| <i>H. heptaphyllus</i> | NKXS01002411.1 | 90586  | 0.40 |
| <i>H. heptaphyllus</i> | NKXS01002417.1 | 97667  | 0.40 |
| <i>H. heptaphyllus</i> | NKXS01002417.1 | 97741  | 0.40 |
| <i>H. heptaphyllus</i> | NKXS01002421.1 | 33777  | 0.40 |
| <i>H. heptaphyllus</i> | NKXS01002459.1 | 63355  | 0.40 |
| <i>H. heptaphyllus</i> | NKXS01002460.1 | 28769  | 0.40 |
| <i>H. heptaphyllus</i> | NKXS01002460.1 | 28776  | 0.40 |
| <i>H. heptaphyllus</i> | NKXS01002460.1 | 28820  | 0.40 |
| <i>H. heptaphyllus</i> | NKXS01002460.1 | 28898  | 0.40 |
| <i>H. heptaphyllus</i> | NKXS01002460.1 | 28991  | 0.40 |
| <i>H. heptaphyllus</i> | NKXS01002462.1 | 23465  | 0.40 |
| <i>H. heptaphyllus</i> | NKXS01002469.1 | 72843  | 0.40 |
| <i>H. heptaphyllus</i> | NKXS01002469.1 | 99613  | 0.40 |
| <i>H. heptaphyllus</i> | NKXS01002469.1 | 99614  | 0.40 |
| <i>H. heptaphyllus</i> | NKXS01002469.1 | 99669  | 0.40 |



|                        |                |        |      |
|------------------------|----------------|--------|------|
| <i>H. heptaphyllus</i> | NKXS01002470.1 | 34932  | 0.40 |
| <i>H. heptaphyllus</i> | NKXS01002470.1 | 34938  | 0.40 |
| <i>H. heptaphyllus</i> | NKXS01002470.1 | 34941  | 0.40 |
| <i>H. heptaphyllus</i> | NKXS01002470.1 | 34971  | 0.40 |
| <i>H. heptaphyllus</i> | NKXS01002482.1 | 14552  | 0.40 |
| <i>H. heptaphyllus</i> | NKXS01002486.1 | 9617   | 0.40 |
| <i>H. heptaphyllus</i> | NKXS01002493.1 | 38908  | 0.40 |
| <i>H. heptaphyllus</i> | NKXS01002512.1 | 58110  | 0.40 |
| <i>H. heptaphyllus</i> | NKXS01002545.1 | 17768  | 0.40 |
| <i>H. heptaphyllus</i> | NKXS01002555.1 | 33225  | 0.40 |
| <i>H. heptaphyllus</i> | NKXS01002570.1 | 59268  | 0.40 |
| <i>H. heptaphyllus</i> | NKXS01002574.1 | 9706   | 0.40 |
| <i>H. heptaphyllus</i> | NKXS01002576.1 | 2103   | 0.40 |
| <i>H. heptaphyllus</i> | NKXS01002577.1 | 191    | 0.40 |
| <i>H. heptaphyllus</i> | NKXS01002577.1 | 350    | 0.40 |
| <i>H. heptaphyllus</i> | NKXS01002577.1 | 355    | 0.40 |
| <i>H. heptaphyllus</i> | NKXS01002577.1 | 356    | 0.40 |
| <i>H. heptaphyllus</i> | NKXS01002577.1 | 388    | 0.40 |
| <i>H. heptaphyllus</i> | NKXS01002587.1 | 15325  | 0.40 |
| <i>H. heptaphyllus</i> | NKXS01002622.1 | 48466  | 0.40 |
| <i>H. heptaphyllus</i> | NKXS01002623.1 | 13560  | 0.40 |
| <i>H. heptaphyllus</i> | NKXS01002637.1 | 87065  | 0.40 |
| <i>H. heptaphyllus</i> | NKXS01002637.1 | 87095  | 0.40 |
| <i>H. heptaphyllus</i> | NKXS01002637.1 | 87113  | 0.40 |
| <i>H. heptaphyllus</i> | NKXS01002637.1 | 87179  | 0.40 |
| <i>H. heptaphyllus</i> | NKXS01002637.1 | 87245  | 0.40 |
| <i>H. heptaphyllus</i> | NKXS01002653.1 | 12680  | 0.40 |
| <i>H. heptaphyllus</i> | NKXS01002653.1 | 12750  | 0.40 |
| <i>H. heptaphyllus</i> | NKXS01002655.1 | 9503   | 0.40 |
| <i>H. heptaphyllus</i> | NKXS01002663.1 | 6558   | 0.40 |
| <i>H. heptaphyllus</i> | NKXS01002705.1 | 210406 | 0.40 |
| <i>H. heptaphyllus</i> | NKXS01002705.1 | 210433 | 0.40 |
| <i>H. heptaphyllus</i> | NKXS01002705.1 | 210451 | 0.40 |
| <i>H. heptaphyllus</i> | NKXS01002705.1 | 210475 | 0.40 |
| <i>H. heptaphyllus</i> | NKXS01002705.1 | 210579 | 0.40 |
| <i>H. heptaphyllus</i> | NKXS01002705.1 | 210597 | 0.40 |
| <i>H. heptaphyllus</i> | NKXS01002718.1 | 2504   | 0.40 |
| <i>H. heptaphyllus</i> | NKXS01002718.1 | 2518   | 0.40 |
| <i>H. heptaphyllus</i> | NKXS01002718.1 | 2525   | 0.40 |
| <i>H. heptaphyllus</i> | NKXS01002718.1 | 2537   | 0.40 |
| <i>H. heptaphyllus</i> | NKXS01002718.1 | 2547   | 0.40 |
| <i>H. heptaphyllus</i> | NKXS01002718.1 | 2553   | 0.40 |
| <i>H. heptaphyllus</i> | NKXS01002718.1 | 2557   | 0.40 |
| <i>H. heptaphyllus</i> | NKXS01002718.1 | 2564   | 0.40 |

|                        |                |        |      |
|------------------------|----------------|--------|------|
| <i>H. heptaphyllus</i> | NKXS01002718.1 | 2566   | 0.40 |
| <i>H. heptaphyllus</i> | NKXS01002718.1 | 2572   | 0.40 |
| <i>H. heptaphyllus</i> | NKXS01002718.1 | 2618   | 0.40 |
| <i>H. heptaphyllus</i> | NKXS01002718.1 | 2652   | 0.40 |
| <i>H. heptaphyllus</i> | NKXS01002730.1 | 26377  | 0.40 |
| <i>H. heptaphyllus</i> | NKXS01002730.1 | 26393  | 0.40 |
| <i>H. heptaphyllus</i> | NKXS01002730.1 | 26412  | 0.40 |
| <i>H. heptaphyllus</i> | NKXS01002730.1 | 26583  | 0.40 |
| <i>H. heptaphyllus</i> | NKXS01002730.1 | 75268  | 0.40 |
| <i>H. heptaphyllus</i> | NKXS01002730.1 | 88585  | 0.40 |
| <i>H. heptaphyllus</i> | NKXS01002744.1 | 77824  | 0.40 |
| <i>H. heptaphyllus</i> | NKXS01002744.1 | 77852  | 0.40 |
| <i>H. heptaphyllus</i> | NKXS01002745.1 | 33480  | 0.40 |
| <i>H. heptaphyllus</i> | NKXS01002747.1 | 37967  | 0.40 |
| <i>H. heptaphyllus</i> | NKXS01002762.1 | 653    | 0.40 |
| <i>H. heptaphyllus</i> | NKXS01002805.1 | 30354  | 0.40 |
| <i>H. heptaphyllus</i> | NKXS01002805.1 | 97932  | 0.40 |
| <i>H. heptaphyllus</i> | NKXS01002817.1 | 27594  | 0.40 |
| <i>H. heptaphyllus</i> | NKXS01002817.1 | 27601  | 0.40 |
| <i>H. heptaphyllus</i> | NKXS01002828.1 | 119663 | 0.40 |
| <i>H. heptaphyllus</i> | NKXS01002828.1 | 119669 | 0.40 |
| <i>H. heptaphyllus</i> | NKXS01002834.1 | 42460  | 0.40 |
| <i>H. heptaphyllus</i> | NKXS01002838.1 | 59866  | 0.40 |
| <i>H. heptaphyllus</i> | NKXS01002843.1 | 79199  | 0.40 |
| <i>H. heptaphyllus</i> | NKXS01002845.1 | 72002  | 0.40 |
| <i>H. heptaphyllus</i> | NKXS01002852.1 | 29230  | 0.40 |
| <i>H. heptaphyllus</i> | NKXS01002854.1 | 36555  | 0.40 |
| <i>H. heptaphyllus</i> | NKXS01002866.1 | 46436  | 0.40 |
| <i>H. heptaphyllus</i> | NKXS01002870.1 | 13277  | 0.40 |
| <i>H. heptaphyllus</i> | NKXS01002870.1 | 13314  | 0.40 |
| <i>H. heptaphyllus</i> | NKXS01002873.1 | 106575 | 0.40 |
| <i>H. heptaphyllus</i> | NKXS01002907.1 | 17333  | 0.40 |
| <i>H. heptaphyllus</i> | NKXS01002919.1 | 41991  | 0.40 |
| <i>H. heptaphyllus</i> | NKXS01002919.1 | 41993  | 0.40 |
| <i>H. heptaphyllus</i> | NKXS01002937.1 | 26629  | 0.40 |
| <i>H. heptaphyllus</i> | NKXS01002938.1 | 53084  | 0.40 |
| <i>H. heptaphyllus</i> | NKXS01002944.1 | 1211   | 0.40 |
| <i>H. heptaphyllus</i> | NKXS01002947.1 | 51634  | 0.40 |
| <i>H. heptaphyllus</i> | NKXS01002966.1 | 37823  | 0.40 |
| <i>H. heptaphyllus</i> | NKXS01002966.1 | 37865  | 0.40 |
| <i>H. heptaphyllus</i> | NKXS01002981.1 | 73375  | 0.40 |
| <i>H. heptaphyllus</i> | NKXS01002982.1 | 8047   | 0.40 |
| <i>H. heptaphyllus</i> | NKXS01002982.1 | 8094   | 0.40 |
| <i>H. heptaphyllus</i> | NKXS01002982.1 | 8098   | 0.40 |

|                        |                |        |      |
|------------------------|----------------|--------|------|
| <i>H. heptaphyllus</i> | NKXS01002982.1 | 8131   | 0.40 |
| <i>H. heptaphyllus</i> | NKXS01002982.1 | 8171   | 0.40 |
| <i>H. heptaphyllus</i> | NKXS01003001.1 | 67410  | 0.40 |
| <i>H. heptaphyllus</i> | NKXS01003013.1 | 106302 | 0.40 |
| <i>H. heptaphyllus</i> | NKXS01003019.1 | 41946  | 0.40 |
| <i>H. heptaphyllus</i> | NKXS01003036.1 | 20305  | 0.40 |
| <i>H. heptaphyllus</i> | NKXS01003058.1 | 71303  | 0.40 |
| <i>H. heptaphyllus</i> | NKXS01003088.1 | 67257  | 0.40 |
| <i>H. heptaphyllus</i> | NKXS01003088.1 | 67426  | 0.40 |
| <i>H. heptaphyllus</i> | NKXS01003111.1 | 2561   | 0.40 |
| <i>H. heptaphyllus</i> | NKXS01003115.1 | 68771  | 0.40 |
| <i>H. heptaphyllus</i> | NKXS01003115.1 | 72469  | 0.40 |
| <i>H. heptaphyllus</i> | NKXS01003115.1 | 72536  | 0.40 |
| <i>H. heptaphyllus</i> | NKXS01003115.1 | 72575  | 0.40 |
| <i>H. heptaphyllus</i> | NKXS01003125.1 | 20636  | 0.40 |
| <i>H. heptaphyllus</i> | NKXS01003134.1 | 66964  | 0.40 |
| <i>H. heptaphyllus</i> | NKXS01003134.1 | 66992  | 0.40 |
| <i>H. heptaphyllus</i> | NKXS01003134.1 | 67086  | 0.40 |
| <i>H. heptaphyllus</i> | NKXS01003154.1 | 30247  | 0.40 |
| <i>H. heptaphyllus</i> | NKXS01003169.1 | 5813   | 0.40 |
| <i>H. heptaphyllus</i> | NKXS01003194.1 | 78359  | 0.40 |
| <i>H. heptaphyllus</i> | NKXS01003194.1 | 78956  | 0.40 |
| <i>H. heptaphyllus</i> | NKXS01003207.1 | 10761  | 0.40 |
| <i>H. heptaphyllus</i> | NKXS01003207.1 | 10881  | 0.40 |
| <i>H. heptaphyllus</i> | NKXS01003207.1 | 10911  | 0.40 |
| <i>H. heptaphyllus</i> | NKXS01003212.1 | 52238  | 0.40 |
| <i>H. heptaphyllus</i> | NKXS01003219.1 | 59261  | 0.40 |
| <i>H. heptaphyllus</i> | NKXS01003269.1 | 20462  | 0.40 |
| <i>H. heptaphyllus</i> | NKXS01003269.1 | 69662  | 0.40 |
| <i>H. heptaphyllus</i> | NKXS01003275.1 | 37692  | 0.40 |
| <i>H. heptaphyllus</i> | NKXS01003275.1 | 40511  | 0.40 |
| <i>H. heptaphyllus</i> | NKXS01003278.1 | 59829  | 0.40 |
| <i>H. heptaphyllus</i> | NKXS01003292.1 | 36952  | 0.40 |
| <i>H. heptaphyllus</i> | NKXS01003295.1 | 47920  | 0.40 |
| <i>H. heptaphyllus</i> | NKXS01003295.1 | 47945  | 0.40 |
| <i>H. heptaphyllus</i> | NKXS01003295.1 | 47952  | 0.40 |
| <i>H. heptaphyllus</i> | NKXS01003295.1 | 47953  | 0.40 |
| <i>H. heptaphyllus</i> | NKXS01003324.1 | 25771  | 0.40 |
| <i>H. heptaphyllus</i> | NKXS01003324.1 | 25799  | 0.40 |
| <i>H. heptaphyllus</i> | NKXS01003325.1 | 60328  | 0.40 |
| <i>H. heptaphyllus</i> | NKXS01003327.1 | 46509  | 0.40 |
| <i>H. heptaphyllus</i> | NKXS01003329.1 | 39884  | 0.40 |
| <i>H. heptaphyllus</i> | NKXS01003332.1 | 5170   | 0.40 |
| <i>H. heptaphyllus</i> | NKXS01003340.1 | 37371  | 0.40 |

|                        |                |        |      |
|------------------------|----------------|--------|------|
| <i>H. heptaphyllus</i> | NKXS01003340.1 | 37397  | 0.40 |
| <i>H. heptaphyllus</i> | NKXS01003340.1 | 37480  | 0.40 |
| <i>H. heptaphyllus</i> | NKXS01003340.1 | 37508  | 0.40 |
| <i>H. heptaphyllus</i> | NKXS01003340.1 | 37511  | 0.40 |
| <i>H. heptaphyllus</i> | NKXS01003340.1 | 37515  | 0.40 |
| <i>H. heptaphyllus</i> | NKXS01003344.1 | 24380  | 0.40 |
| <i>H. heptaphyllus</i> | NKXS01003344.1 | 24400  | 0.40 |
| <i>H. heptaphyllus</i> | NKXS01003344.1 | 24407  | 0.40 |
| <i>H. heptaphyllus</i> | NKXS01003344.1 | 24422  | 0.40 |
| <i>H. heptaphyllus</i> | NKXS01003344.1 | 24440  | 0.40 |
| <i>H. heptaphyllus</i> | NKXS01003382.1 | 14835  | 0.40 |
| <i>H. heptaphyllus</i> | NKXS01003399.1 | 63054  | 0.40 |
| <i>H. heptaphyllus</i> | NKXS01003402.1 | 71857  | 0.40 |
| <i>H. heptaphyllus</i> | NKXS01003412.1 | 30835  | 0.40 |
| <i>H. heptaphyllus</i> | NKXS01003459.1 | 41054  | 0.40 |
| <i>H. heptaphyllus</i> | NKXS01003480.1 | 9424   | 0.40 |
| <i>H. heptaphyllus</i> | NKXS01003511.1 | 7995   | 0.40 |
| <i>H. heptaphyllus</i> | NKXS01003511.1 | 8131   | 0.40 |
| <i>H. heptaphyllus</i> | NKXS01003521.1 | 14665  | 0.40 |
| <i>H. heptaphyllus</i> | NKXS01003533.1 | 76425  | 0.40 |
| <i>H. heptaphyllus</i> | NKXS01003533.1 | 76440  | 0.40 |
| <i>H. heptaphyllus</i> | NKXS01003576.1 | 98110  | 0.40 |
| <i>H. heptaphyllus</i> | NKXS01003581.1 | 101541 | 0.40 |
| <i>H. heptaphyllus</i> | NKXS01003594.1 | 46194  | 0.40 |
| <i>H. heptaphyllus</i> | NKXS01003617.1 | 48619  | 0.40 |
| <i>H. heptaphyllus</i> | NKXS01003657.1 | 73840  | 0.40 |
| <i>H. heptaphyllus</i> | NKXS01003657.1 | 74244  | 0.40 |
| <i>H. heptaphyllus</i> | NKXS01003667.1 | 38558  | 0.40 |
| <i>H. heptaphyllus</i> | NKXS01003686.1 | 10249  | 0.40 |
| <i>H. heptaphyllus</i> | NKXS01003712.1 | 33853  | 0.40 |
| <i>H. heptaphyllus</i> | NKXS01003732.1 | 12995  | 0.40 |
| <i>H. heptaphyllus</i> | NKXS01003732.1 | 13008  | 0.40 |
| <i>H. heptaphyllus</i> | NKXS01003754.1 | 13842  | 0.40 |
| <i>H. heptaphyllus</i> | NKXS01003762.1 | 49971  | 0.40 |
| <i>H. heptaphyllus</i> | NKXS01003765.1 | 15754  | 0.40 |
| <i>H. heptaphyllus</i> | NKXS01003765.1 | 15807  | 0.40 |
| <i>H. heptaphyllus</i> | NKXS01003765.1 | 15965  | 0.40 |
| <i>H. heptaphyllus</i> | NKXS01003796.1 | 43295  | 0.40 |
| <i>H. heptaphyllus</i> | NKXS01003817.1 | 16764  | 0.40 |
| <i>H. heptaphyllus</i> | NKXS01003823.1 | 44800  | 0.40 |
| <i>H. heptaphyllus</i> | NKXS01003845.1 | 49236  | 0.40 |
| <i>H. heptaphyllus</i> | NKXS01003845.1 | 126441 | 0.40 |
| <i>H. heptaphyllus</i> | NKXS01003849.1 | 35942  | 0.40 |
| <i>H. heptaphyllus</i> | NKXS01003849.1 | 36091  | 0.40 |

|                        |                |        |      |
|------------------------|----------------|--------|------|
| <i>H. heptaphyllus</i> | NKXS01003868.1 | 57490  | 0.40 |
| <i>H. heptaphyllus</i> | NKXS01003868.1 | 57532  | 0.40 |
| <i>H. heptaphyllus</i> | NKXS01003868.1 | 57546  | 0.40 |
| <i>H. heptaphyllus</i> | NKXS01003868.1 | 57627  | 0.40 |
| <i>H. heptaphyllus</i> | NKXS01003868.1 | 57645  | 0.40 |
| <i>H. heptaphyllus</i> | NKXS01003868.1 | 118402 | 0.40 |
| <i>H. heptaphyllus</i> | NKXS01003873.1 | 433    | 0.40 |
| <i>H. heptaphyllus</i> | NKXS01003919.1 | 44374  | 0.40 |
| <i>H. heptaphyllus</i> | NKXS01003919.1 | 44375  | 0.40 |
| <i>H. heptaphyllus</i> | NKXS01003919.1 | 44389  | 0.40 |
| <i>H. heptaphyllus</i> | NKXS01003919.1 | 44419  | 0.40 |
| <i>H. heptaphyllus</i> | NKXS01003934.1 | 58741  | 0.40 |
| <i>H. heptaphyllus</i> | NKXS01003962.1 | 12700  | 0.40 |
| <i>H. heptaphyllus</i> | NKXS01003962.1 | 12856  | 0.40 |
| <i>H. heptaphyllus</i> | NKXS01003962.1 | 12857  | 0.40 |
| <i>H. heptaphyllus</i> | NKXS01003962.1 | 12891  | 0.40 |
| <i>H. heptaphyllus</i> | NKXS01003966.1 | 26214  | 0.40 |
| <i>H. heptaphyllus</i> | NKXS01003980.1 | 15954  | 0.40 |
| <i>H. heptaphyllus</i> | NKXS01003981.1 | 26615  | 0.40 |
| <i>H. heptaphyllus</i> | NKXS01004050.1 | 14109  | 0.40 |
| <i>H. heptaphyllus</i> | NKXS01004069.1 | 81633  | 0.40 |
| <i>H. heptaphyllus</i> | NKXS01004071.1 | 48654  | 0.40 |
| <i>H. heptaphyllus</i> | NKXS01004098.1 | 31816  | 0.40 |
| <i>H. heptaphyllus</i> | NKXS01004107.1 | 37531  | 0.40 |
| <i>H. heptaphyllus</i> | NKXS01004120.1 | 9550   | 0.40 |
| <i>H. heptaphyllus</i> | NKXS01004122.1 | 59483  | 0.40 |
| <i>H. heptaphyllus</i> | NKXS01004131.1 | 49269  | 0.40 |
| <i>H. heptaphyllus</i> | NKXS01004139.1 | 44282  | 0.40 |
| <i>H. heptaphyllus</i> | NKXS01004167.1 | 20283  | 0.40 |
| <i>H. heptaphyllus</i> | NKXS01004175.1 | 36406  | 0.40 |
| <i>H. heptaphyllus</i> | NKXS01004175.1 | 36410  | 0.40 |
| <i>H. heptaphyllus</i> | NKXS01004175.1 | 36532  | 0.40 |
| <i>H. heptaphyllus</i> | NKXS01004175.1 | 36569  | 0.40 |
| <i>H. heptaphyllus</i> | NKXS01004214.1 | 8869   | 0.40 |
| <i>H. heptaphyllus</i> | NKXS01004227.1 | 44070  | 0.40 |
| <i>H. heptaphyllus</i> | NKXS01004227.1 | 44087  | 0.40 |
| <i>H. heptaphyllus</i> | NKXS01004235.1 | 60274  | 0.40 |
| <i>H. heptaphyllus</i> | NKXS01004245.1 | 19460  | 0.40 |
| <i>H. heptaphyllus</i> | NKXS01004247.1 | 38672  | 0.40 |
| <i>H. heptaphyllus</i> | NKXS01004247.1 | 38729  | 0.40 |
| <i>H. heptaphyllus</i> | NKXS01004247.1 | 38766  | 0.40 |
| <i>H. heptaphyllus</i> | NKXS01004247.1 | 38774  | 0.40 |
| <i>H. heptaphyllus</i> | NKXS01004247.1 | 38809  | 0.40 |
| <i>H. heptaphyllus</i> | NKXS01004247.1 | 38811  | 0.40 |

|                        |                |       |      |
|------------------------|----------------|-------|------|
| <i>H. heptaphyllus</i> | NKXS01004247.1 | 38816 | 0.40 |
| <i>H. heptaphyllus</i> | NKXS01004283.1 | 13246 | 0.40 |
| <i>H. heptaphyllus</i> | NKXS01004283.1 | 63149 | 0.40 |
| <i>H. heptaphyllus</i> | NKXS01004283.1 | 63216 | 0.40 |
| <i>H. heptaphyllus</i> | NKXS01004283.1 | 63230 | 0.40 |
| <i>H. heptaphyllus</i> | NKXS01004289.1 | 19181 | 0.40 |
| <i>H. heptaphyllus</i> | NKXS01004300.1 | 49857 | 0.40 |
| <i>H. heptaphyllus</i> | NKXS01004300.1 | 49927 | 0.40 |
| <i>H. heptaphyllus</i> | NKXS01004300.1 | 50079 | 0.40 |
| <i>H. heptaphyllus</i> | NKXS01004305.1 | 11145 | 0.40 |
| <i>H. heptaphyllus</i> | NKXS01004305.1 | 11255 | 0.40 |
| <i>H. heptaphyllus</i> | NKXS01004323.1 | 3270  | 0.40 |
| <i>H. heptaphyllus</i> | NKXS01004334.1 | 27772 | 0.40 |
| <i>H. heptaphyllus</i> | NKXS01004338.1 | 17894 | 0.40 |
| <i>H. heptaphyllus</i> | NKXS01004365.1 | 36553 | 0.40 |
| <i>H. heptaphyllus</i> | NKXS01004369.1 | 11419 | 0.40 |
| <i>H. heptaphyllus</i> | NKXS01004369.1 | 11422 | 0.40 |
| <i>H. heptaphyllus</i> | NKXS01004369.1 | 11471 | 0.40 |
| <i>H. heptaphyllus</i> | NKXS01004369.1 | 11507 | 0.40 |
| <i>H. heptaphyllus</i> | NKXS01004369.1 | 11518 | 0.40 |
| <i>H. heptaphyllus</i> | NKXS01004381.1 | 56567 | 0.40 |
| <i>H. heptaphyllus</i> | NKXS01004390.1 | 62344 | 0.40 |
| <i>H. heptaphyllus</i> | NKXS01004413.1 | 52692 | 0.40 |
| <i>H. heptaphyllus</i> | NKXS01004413.1 | 52694 | 0.40 |
| <i>H. heptaphyllus</i> | NKXS01004413.1 | 52739 | 0.40 |
| <i>H. heptaphyllus</i> | NKXS01004414.1 | 1030  | 0.40 |
| <i>H. heptaphyllus</i> | NKXS01004414.1 | 1036  | 0.40 |
| <i>H. heptaphyllus</i> | NKXS01004422.1 | 7746  | 0.40 |
| <i>H. heptaphyllus</i> | NKXS01004444.1 | 15892 | 0.40 |
| <i>H. heptaphyllus</i> | NKXS01004444.1 | 15941 | 0.40 |
| <i>H. heptaphyllus</i> | NKXS01004449.1 | 41486 | 0.40 |
| <i>H. heptaphyllus</i> | NKXS01004449.1 | 41585 | 0.40 |
| <i>H. heptaphyllus</i> | NKXS01004485.1 | 10387 | 0.40 |
| <i>H. heptaphyllus</i> | NKXS01004513.1 | 33982 | 0.40 |
| <i>H. heptaphyllus</i> | NKXS01004513.1 | 34030 | 0.40 |
| <i>H. heptaphyllus</i> | NKXS01004612.1 | 18246 | 0.40 |
| <i>H. heptaphyllus</i> | NKXS01004620.1 | 9979  | 0.40 |
| <i>H. heptaphyllus</i> | NKXS01004626.1 | 8659  | 0.40 |
| <i>H. heptaphyllus</i> | NKXS01004626.1 | 8682  | 0.40 |
| <i>H. heptaphyllus</i> | NKXS01004626.1 | 8688  | 0.40 |
| <i>H. heptaphyllus</i> | NKXS01004626.1 | 8742  | 0.40 |
| <i>H. heptaphyllus</i> | NKXS01004626.1 | 8841  | 0.40 |
| <i>H. heptaphyllus</i> | NKXS01004626.1 | 8860  | 0.40 |
| <i>H. heptaphyllus</i> | NKXS01004673.1 | 21936 | 0.40 |

|                        |                |        |      |
|------------------------|----------------|--------|------|
| <i>H. heptaphyllus</i> | NKXS01004705.1 | 41071  | 0.40 |
| <i>H. heptaphyllus</i> | NKXS01004705.1 | 41152  | 0.40 |
| <i>H. heptaphyllus</i> | NKXS01004750.1 | 26986  | 0.40 |
| <i>H. heptaphyllus</i> | NKXS01004786.1 | 33078  | 0.40 |
| <i>H. heptaphyllus</i> | NKXS01004801.1 | 28730  | 0.40 |
| <i>H. heptaphyllus</i> | NKXS01004812.1 | 29611  | 0.40 |
| <i>H. heptaphyllus</i> | NKXS01004821.1 | 20383  | 0.40 |
| <i>H. heptaphyllus</i> | NKXS01004837.1 | 22366  | 0.40 |
| <i>H. heptaphyllus</i> | NKXS01004837.1 | 22480  | 0.40 |
| <i>H. heptaphyllus</i> | NKXS01004877.1 | 10779  | 0.40 |
| <i>H. heptaphyllus</i> | NKXS01004877.1 | 10781  | 0.40 |
| <i>H. heptaphyllus</i> | NKXS01004877.1 | 10801  | 0.40 |
| <i>H. heptaphyllus</i> | NKXS01004877.1 | 10804  | 0.40 |
| <i>H. heptaphyllus</i> | NKXS01004888.1 | 2168   | 0.40 |
| <i>H. heptaphyllus</i> | NKXS01004888.1 | 2187   | 0.40 |
| <i>H. heptaphyllus</i> | NKXS01004888.1 | 2396   | 0.40 |
| <i>H. heptaphyllus</i> | NKXS01004905.1 | 12306  | 0.40 |
| <i>H. heptaphyllus</i> | NKXS01004913.1 | 56787  | 0.40 |
| <i>H. heptaphyllus</i> | NKXS01004919.1 | 2168   | 0.40 |
| <i>H. heptaphyllus</i> | NKXS01004928.1 | 4822   | 0.40 |
| <i>H. heptaphyllus</i> | NKXS01004943.1 | 108284 | 0.40 |
| <i>H. heptaphyllus</i> | NKXS01004944.1 | 45332  | 0.40 |
| <i>H. heptaphyllus</i> | NKXS01004951.1 | 20749  | 0.40 |
| <i>H. heptaphyllus</i> | NKXS01004951.1 | 20770  | 0.40 |
| <i>H. heptaphyllus</i> | NKXS01005003.1 | 9409   | 0.40 |
| <i>H. heptaphyllus</i> | NKXS01005005.1 | 37206  | 0.40 |
| <i>H. heptaphyllus</i> | NKXS01005008.1 | 94413  | 0.40 |
| <i>H. heptaphyllus</i> | NKXS01005059.1 | 35032  | 0.40 |
| <i>H. heptaphyllus</i> | NKXS01005059.1 | 35143  | 0.40 |
| <i>H. heptaphyllus</i> | NKXS01005070.1 | 27546  | 0.40 |
| <i>H. heptaphyllus</i> | NKXS01005109.1 | 43135  | 0.40 |
| <i>H. heptaphyllus</i> | NKXS01005135.1 | 12474  | 0.40 |
| <i>H. heptaphyllus</i> | NKXS01005135.1 | 12531  | 0.40 |
| <i>H. heptaphyllus</i> | NKXS01005135.1 | 12623  | 0.40 |
| <i>H. heptaphyllus</i> | NKXS01005156.1 | 24102  | 0.40 |
| <i>H. heptaphyllus</i> | NKXS01005156.1 | 24117  | 0.40 |
| <i>H. heptaphyllus</i> | NKXS01005193.1 | 27763  | 0.40 |
| <i>H. heptaphyllus</i> | NKXS01005202.1 | 5026   | 0.40 |
| <i>H. heptaphyllus</i> | NKXS01005210.1 | 15700  | 0.40 |
| <i>H. heptaphyllus</i> | NKXS01005213.1 | 31378  | 0.40 |
| <i>H. heptaphyllus</i> | NKXS01005213.1 | 31387  | 0.40 |
| <i>H. heptaphyllus</i> | NKXS01005218.1 | 41446  | 0.40 |
| <i>H. heptaphyllus</i> | NKXS01005218.1 | 41480  | 0.40 |
| <i>H. heptaphyllus</i> | NKXS01005229.1 | 43717  | 0.40 |

|                        |                |       |      |
|------------------------|----------------|-------|------|
| <i>H. heptaphyllus</i> | NKXS01005229.1 | 44748 | 0.40 |
| <i>H. heptaphyllus</i> | NKXS01005243.1 | 45666 | 0.40 |
| <i>H. heptaphyllus</i> | NKXS01005245.1 | 26921 | 0.40 |
| <i>H. heptaphyllus</i> | NKXS01005245.1 | 26967 | 0.40 |
| <i>H. heptaphyllus</i> | NKXS01005252.1 | 35816 | 0.40 |
| <i>H. heptaphyllus</i> | NKXS01005269.1 | 24583 | 0.40 |
| <i>H. heptaphyllus</i> | NKXS01005296.1 | 33592 | 0.40 |
| <i>H. heptaphyllus</i> | NKXS01005329.1 | 53547 | 0.40 |
| <i>H. heptaphyllus</i> | NKXS01005358.1 | 28809 | 0.40 |
| <i>H. heptaphyllus</i> | NKXS01005360.1 | 13589 | 0.40 |
| <i>H. heptaphyllus</i> | NKXS01005368.1 | 1153  | 0.40 |
| <i>H. heptaphyllus</i> | NKXS01005368.1 | 1188  | 0.40 |
| <i>H. heptaphyllus</i> | NKXS01005368.1 | 1226  | 0.40 |
| <i>H. heptaphyllus</i> | NKXS01005368.1 | 1247  | 0.40 |
| <i>H. heptaphyllus</i> | NKXS01005368.1 | 1342  | 0.40 |
| <i>H. heptaphyllus</i> | NKXS01005389.1 | 34323 | 0.40 |
| <i>H. heptaphyllus</i> | NKXS01005405.1 | 8735  | 0.40 |
| <i>H. heptaphyllus</i> | NKXS01005417.1 | 38546 | 0.40 |
| <i>H. heptaphyllus</i> | NKXS01005417.1 | 48312 | 0.40 |
| <i>H. heptaphyllus</i> | NKXS01005434.1 | 38960 | 0.40 |
| <i>H. heptaphyllus</i> | NKXS01005440.1 | 25470 | 0.40 |
| <i>H. heptaphyllus</i> | NKXS01005440.1 | 25494 | 0.40 |
| <i>H. heptaphyllus</i> | NKXS01005457.1 | 13517 | 0.40 |
| <i>H. heptaphyllus</i> | NKXS01005457.1 | 13544 | 0.40 |
| <i>H. heptaphyllus</i> | NKXS01005457.1 | 13582 | 0.40 |
| <i>H. heptaphyllus</i> | NKXS01005481.1 | 9386  | 0.40 |
| <i>H. heptaphyllus</i> | NKXS01005511.1 | 37270 | 0.40 |
| <i>H. heptaphyllus</i> | NKXS01005542.1 | 36843 | 0.40 |
| <i>H. heptaphyllus</i> | NKXS01005542.1 | 36855 | 0.40 |
| <i>H. heptaphyllus</i> | NKXS01005629.1 | 44540 | 0.40 |
| <i>H. heptaphyllus</i> | NKXS01005629.1 | 44560 | 0.40 |
| <i>H. heptaphyllus</i> | NKXS01005629.1 | 44614 | 0.40 |
| <i>H. heptaphyllus</i> | NKXS01005629.1 | 44634 | 0.40 |
| <i>H. heptaphyllus</i> | NKXS01005631.1 | 59971 | 0.40 |
| <i>H. heptaphyllus</i> | NKXS01005692.1 | 5318  | 0.40 |
| <i>H. heptaphyllus</i> | NKXS01005698.1 | 37902 | 0.40 |
| <i>H. heptaphyllus</i> | NKXS01005702.1 | 12928 | 0.40 |
| <i>H. heptaphyllus</i> | NKXS01005702.1 | 12956 | 0.40 |
| <i>H. heptaphyllus</i> | NKXS01005702.1 | 13008 | 0.40 |
| <i>H. heptaphyllus</i> | NKXS01005789.1 | 10630 | 0.40 |
| <i>H. heptaphyllus</i> | NKXS01005789.1 | 10682 | 0.40 |
| <i>H. heptaphyllus</i> | NKXS01005789.1 | 10815 | 0.40 |
| <i>H. heptaphyllus</i> | NKXS01005823.1 | 33996 | 0.40 |
| <i>H. heptaphyllus</i> | NKXS01005823.1 | 34022 | 0.40 |



|                        |                |       |      |
|------------------------|----------------|-------|------|
| <i>H. heptaphyllus</i> | NKXS01005855.1 | 21363 | 0.40 |
| <i>H. heptaphyllus</i> | NKXS01005855.1 | 24215 | 0.40 |
| <i>H. heptaphyllus</i> | NKXS01005858.1 | 11981 | 0.40 |
| <i>H. heptaphyllus</i> | NKXS01005858.1 | 12037 | 0.40 |
| <i>H. heptaphyllus</i> | NKXS01005858.1 | 12093 | 0.40 |
| <i>H. heptaphyllus</i> | NKXS01005867.1 | 41353 | 0.40 |
| <i>H. heptaphyllus</i> | NKXS01005915.1 | 8661  | 0.40 |
| <i>H. heptaphyllus</i> | NKXS01005915.1 | 8665  | 0.40 |
| <i>H. heptaphyllus</i> | NKXS01005915.1 | 8668  | 0.40 |
| <i>H. heptaphyllus</i> | NKXS01005915.1 | 8669  | 0.40 |
| <i>H. heptaphyllus</i> | NKXS01005915.1 | 8673  | 0.40 |
| <i>H. heptaphyllus</i> | NKXS01005915.1 | 8678  | 0.40 |
| <i>H. heptaphyllus</i> | NKXS01005915.1 | 8697  | 0.40 |
| <i>H. heptaphyllus</i> | NKXS01005915.1 | 8702  | 0.40 |
| <i>H. heptaphyllus</i> | NKXS01005915.1 | 8716  | 0.40 |
| <i>H. heptaphyllus</i> | NKXS01005915.1 | 8719  | 0.40 |
| <i>H. heptaphyllus</i> | NKXS01005915.1 | 8767  | 0.40 |
| <i>H. heptaphyllus</i> | NKXS01005945.1 | 12140 | 0.40 |
| <i>H. heptaphyllus</i> | NKXS01005950.1 | 12165 | 0.40 |
| <i>H. heptaphyllus</i> | NKXS01005950.1 | 12325 | 0.40 |
| <i>H. heptaphyllus</i> | NKXS01005960.1 | 30001 | 0.40 |
| <i>H. heptaphyllus</i> | NKXS01005998.1 | 41123 | 0.40 |
| <i>H. heptaphyllus</i> | NKXS01005998.1 | 41275 | 0.40 |
| <i>H. heptaphyllus</i> | NKXS01005998.1 | 41284 | 0.40 |
| <i>H. heptaphyllus</i> | NKXS01005998.1 | 41349 | 0.40 |
| <i>H. heptaphyllus</i> | NKXS01006017.1 | 6182  | 0.40 |
| <i>H. heptaphyllus</i> | NKXS01006060.1 | 61888 | 0.40 |
| <i>H. heptaphyllus</i> | NKXS01006061.1 | 28805 | 0.40 |
| <i>H. heptaphyllus</i> | NKXS01006071.1 | 37889 | 0.40 |
| <i>H. heptaphyllus</i> | NKXS01006096.1 | 20319 | 0.40 |
| <i>H. heptaphyllus</i> | NKXS01006096.1 | 20510 | 0.40 |
| <i>H. heptaphyllus</i> | NKXS01006106.1 | 2949  | 0.40 |
| <i>H. heptaphyllus</i> | NKXS01006107.1 | 28334 | 0.40 |
| <i>H. heptaphyllus</i> | NKXS01006150.1 | 36107 | 0.40 |
| <i>H. heptaphyllus</i> | NKXS01006151.1 | 20622 | 0.40 |
| <i>H. heptaphyllus</i> | NKXS01006164.1 | 11032 | 0.40 |
| <i>H. heptaphyllus</i> | NKXS01006185.1 | 33264 | 0.40 |
| <i>H. heptaphyllus</i> | NKXS01006204.1 | 5923  | 0.40 |
| <i>H. heptaphyllus</i> | NKXS01006212.1 | 26601 | 0.40 |
| <i>H. heptaphyllus</i> | NKXS01006225.1 | 33518 | 0.40 |
| <i>H. heptaphyllus</i> | NKXS01006225.1 | 33549 | 0.40 |
| <i>H. heptaphyllus</i> | NKXS01006228.1 | 23190 | 0.40 |
| <i>H. heptaphyllus</i> | NKXS01006228.1 | 23226 | 0.40 |
| <i>H. heptaphyllus</i> | NKXS01006228.1 | 23399 | 0.40 |

|                        |                |       |      |
|------------------------|----------------|-------|------|
| <i>H. heptaphyllus</i> | NKXS01006228.1 | 29004 | 0.40 |
| <i>H. heptaphyllus</i> | NKXS01006250.1 | 16959 | 0.40 |
| <i>H. heptaphyllus</i> | NKXS01006250.1 | 16997 | 0.40 |
| <i>H. heptaphyllus</i> | NKXS01006250.1 | 17012 | 0.40 |
| <i>H. heptaphyllus</i> | NKXS01006250.1 | 17035 | 0.40 |
| <i>H. heptaphyllus</i> | NKXS01006250.1 | 19088 | 0.40 |
| <i>H. heptaphyllus</i> | NKXS01006250.1 | 19792 | 0.40 |
| <i>H. heptaphyllus</i> | NKXS01006250.1 | 19826 | 0.40 |
| <i>H. heptaphyllus</i> | NKXS01006262.1 | 14365 | 0.40 |
| <i>H. heptaphyllus</i> | NKXS01006278.1 | 37060 | 0.40 |
| <i>H. heptaphyllus</i> | NKXS01006289.1 | 3043  | 0.40 |
| <i>H. heptaphyllus</i> | NKXS01006289.1 | 3047  | 0.40 |
| <i>H. heptaphyllus</i> | NKXS01006289.1 | 3055  | 0.40 |
| <i>H. heptaphyllus</i> | NKXS01006289.1 | 3074  | 0.40 |
| <i>H. heptaphyllus</i> | NKXS01006289.1 | 3076  | 0.40 |
| <i>H. heptaphyllus</i> | NKXS01006289.1 | 3169  | 0.40 |
| <i>H. heptaphyllus</i> | NKXS01006289.1 | 3175  | 0.40 |
| <i>H. heptaphyllus</i> | NKXS01006289.1 | 3220  | 0.40 |
| <i>H. heptaphyllus</i> | NKXS01006289.1 | 3229  | 0.40 |
| <i>H. heptaphyllus</i> | NKXS01006289.1 | 3246  | 0.40 |
| <i>H. heptaphyllus</i> | NKXS01006289.1 | 3268  | 0.40 |
| <i>H. heptaphyllus</i> | NKXS01006306.1 | 24801 | 0.40 |
| <i>H. heptaphyllus</i> | NKXS01006331.1 | 4517  | 0.40 |
| <i>H. heptaphyllus</i> | NKXS01006331.1 | 4533  | 0.40 |
| <i>H. heptaphyllus</i> | NKXS01006346.1 | 7154  | 0.40 |
| <i>H. heptaphyllus</i> | NKXS01006347.1 | 15829 | 0.40 |
| <i>H. heptaphyllus</i> | NKXS01006347.1 | 15839 | 0.40 |
| <i>H. heptaphyllus</i> | NKXS01006360.1 | 5994  | 0.40 |
| <i>H. heptaphyllus</i> | NKXS01006363.1 | 32414 | 0.40 |
| <i>H. heptaphyllus</i> | NKXS01006363.1 | 32475 | 0.40 |
| <i>H. heptaphyllus</i> | NKXS01006401.1 | 7752  | 0.40 |
| <i>H. heptaphyllus</i> | NKXS01006438.1 | 7796  | 0.40 |
| <i>H. heptaphyllus</i> | NKXS01006438.1 | 29525 | 0.40 |
| <i>H. heptaphyllus</i> | NKXS01006467.1 | 3436  | 0.40 |
| <i>H. heptaphyllus</i> | NKXS01006479.1 | 34344 | 0.40 |
| <i>H. heptaphyllus</i> | NKXS01006502.1 | 38233 | 0.40 |
| <i>H. heptaphyllus</i> | NKXS01006502.1 | 38367 | 0.40 |
| <i>H. heptaphyllus</i> | NKXS01006502.1 | 40500 | 0.40 |
| <i>H. heptaphyllus</i> | NKXS01006549.1 | 17749 | 0.40 |
| <i>H. heptaphyllus</i> | NKXS01006619.1 | 34755 | 0.40 |
| <i>H. heptaphyllus</i> | NKXS01006624.1 | 18866 | 0.40 |
| <i>H. heptaphyllus</i> | NKXS01006624.1 | 18997 | 0.40 |
| <i>H. heptaphyllus</i> | NKXS01006624.1 | 19050 | 0.40 |
| <i>H. heptaphyllus</i> | NKXS01006624.1 | 19096 | 0.40 |

|                        |                |       |      |
|------------------------|----------------|-------|------|
| <i>H. heptaphyllus</i> | NKXS01006625.1 | 702   | 0.40 |
| <i>H. heptaphyllus</i> | NKXS01006625.1 | 779   | 0.40 |
| <i>H. heptaphyllus</i> | NKXS01006625.1 | 789   | 0.40 |
| <i>H. heptaphyllus</i> | NKXS01006625.1 | 793   | 0.40 |
| <i>H. heptaphyllus</i> | NKXS01006684.1 | 26216 | 0.40 |
| <i>H. heptaphyllus</i> | NKXS01006689.1 | 15600 | 0.40 |
| <i>H. heptaphyllus</i> | NKXS01006719.1 | 25005 | 0.40 |
| <i>H. heptaphyllus</i> | NKXS01006739.1 | 20562 | 0.40 |
| <i>H. heptaphyllus</i> | NKXS01006778.1 | 24813 | 0.40 |
| <i>H. heptaphyllus</i> | NKXS01006778.1 | 24844 | 0.40 |
| <i>H. heptaphyllus</i> | NKXS01006807.1 | 30808 | 0.40 |
| <i>H. heptaphyllus</i> | NKXS01006920.1 | 32354 | 0.40 |
| <i>H. heptaphyllus</i> | NKXS01006941.1 | 20583 | 0.40 |
| <i>H. heptaphyllus</i> | NKXS01006941.1 | 20593 | 0.40 |
| <i>H. heptaphyllus</i> | NKXS01006941.1 | 20603 | 0.40 |
| <i>H. heptaphyllus</i> | NKXS01006941.1 | 20677 | 0.40 |
| <i>H. heptaphyllus</i> | NKXS01006956.1 | 17830 | 0.40 |
| <i>H. heptaphyllus</i> | NKXS01007081.1 | 11600 | 0.40 |
| <i>H. heptaphyllus</i> | NKXS01007124.1 | 1396  | 0.40 |
| <i>H. heptaphyllus</i> | NKXS01007124.1 | 1422  | 0.40 |
| <i>H. heptaphyllus</i> | NKXS01007124.1 | 1543  | 0.40 |
| <i>H. heptaphyllus</i> | NKXS01007131.1 | 20192 | 0.40 |
| <i>H. heptaphyllus</i> | NKXS01007131.1 | 20217 | 0.40 |
| <i>H. heptaphyllus</i> | NKXS01007173.1 | 16207 | 0.40 |
| <i>H. heptaphyllus</i> | NKXS01007189.1 | 18845 | 0.40 |
| <i>H. heptaphyllus</i> | NKXS01007218.1 | 10130 | 0.40 |
| <i>H. heptaphyllus</i> | NKXS01007218.1 | 10359 | 0.40 |
| <i>H. heptaphyllus</i> | NKXS01007218.1 | 10369 | 0.40 |
| <i>H. heptaphyllus</i> | NKXS01007358.1 | 13482 | 0.40 |
| <i>H. heptaphyllus</i> | NKXS01007362.1 | 22258 | 0.40 |
| <i>H. heptaphyllus</i> | NKXS01007362.1 | 22324 | 0.40 |
| <i>H. heptaphyllus</i> | NKXS01007369.1 | 9645  | 0.40 |
| <i>H. heptaphyllus</i> | NKXS01007369.1 | 9708  | 0.40 |
| <i>H. heptaphyllus</i> | NKXS01007395.1 | 16402 | 0.40 |
| <i>H. heptaphyllus</i> | NKXS01007427.1 | 9460  | 0.40 |
| <i>H. heptaphyllus</i> | NKXS01007427.1 | 9526  | 0.40 |
| <i>H. heptaphyllus</i> | NKXS01007427.1 | 9609  | 0.40 |
| <i>H. heptaphyllus</i> | NKXS01007427.1 | 9664  | 0.40 |
| <i>H. heptaphyllus</i> | NKXS01007460.1 | 15479 | 0.40 |
| <i>H. heptaphyllus</i> | NKXS01007460.1 | 15497 | 0.40 |
| <i>H. heptaphyllus</i> | NKXS01007460.1 | 15547 | 0.40 |
| <i>H. heptaphyllus</i> | NKXS01007460.1 | 15563 | 0.40 |
| <i>H. heptaphyllus</i> | NKXS01007460.1 | 15582 | 0.40 |
| <i>H. heptaphyllus</i> | NKXS01007460.1 | 15611 | 0.40 |

|                        |                |       |      |
|------------------------|----------------|-------|------|
| <i>H. heptaphyllus</i> | NKXS01007506.1 | 9764  | 0.40 |
| <i>H. heptaphyllus</i> | NKXS01007519.1 | 11014 | 0.40 |
| <i>H. heptaphyllus</i> | NKXS01007524.1 | 4387  | 0.40 |
| <i>H. heptaphyllus</i> | NKXS01007543.1 | 9001  | 0.40 |
| <i>H. heptaphyllus</i> | NKXS01007543.1 | 9049  | 0.40 |
| <i>H. heptaphyllus</i> | NKXS01007580.1 | 2195  | 0.40 |
| <i>H. heptaphyllus</i> | NKXS01007678.1 | 1339  | 0.40 |
| <i>H. heptaphyllus</i> | NKXS01007685.1 | 10137 | 0.40 |
| <i>H. heptaphyllus</i> | NKXS01007703.1 | 11882 | 0.40 |
| <i>H. heptaphyllus</i> | NKXS01007703.1 | 11967 | 0.40 |
| <i>H. heptaphyllus</i> | NKXS01007797.1 | 24429 | 0.40 |
| <i>H. heptaphyllus</i> | NKXS01007797.1 | 24509 | 0.40 |
| <i>H. heptaphyllus</i> | NKXS01007797.1 | 24524 | 0.40 |
| <i>H. heptaphyllus</i> | NKXS01007843.1 | 2104  | 0.40 |
| <i>H. heptaphyllus</i> | NKXS01007910.1 | 18534 | 0.40 |
| <i>H. heptaphyllus</i> | NKXS01007927.1 | 17291 | 0.40 |
| <i>H. heptaphyllus</i> | NKXS01007933.1 | 20432 | 0.40 |
| <i>H. heptaphyllus</i> | NKXS01007933.1 | 20490 | 0.40 |
| <i>H. heptaphyllus</i> | NKXS01008001.1 | 8396  | 0.40 |
| <i>H. heptaphyllus</i> | NKXS01008023.1 | 17432 | 0.40 |
| <i>H. heptaphyllus</i> | NKXS01008042.1 | 3239  | 0.40 |
| <i>H. heptaphyllus</i> | NKXS01008129.1 | 10271 | 0.40 |
| <i>H. heptaphyllus</i> | NKXS01008129.1 | 10305 | 0.40 |
| <i>H. heptaphyllus</i> | NKXS01008129.1 | 10323 | 0.40 |
| <i>H. heptaphyllus</i> | NKXS01008129.1 | 10350 | 0.40 |
| <i>H. heptaphyllus</i> | NKXS01008129.1 | 10354 | 0.40 |
| <i>H. heptaphyllus</i> | NKXS01008129.1 | 10408 | 0.40 |
| <i>H. heptaphyllus</i> | NKXS01008129.1 | 10417 | 0.40 |
| <i>H. heptaphyllus</i> | NKXS01008129.1 | 10422 | 0.40 |
| <i>H. heptaphyllus</i> | NKXS01008129.1 | 10503 | 0.40 |
| <i>H. heptaphyllus</i> | NKXS01008270.1 | 619   | 0.40 |
| <i>H. heptaphyllus</i> | NKXS01008270.1 | 704   | 0.40 |
| <i>H. heptaphyllus</i> | NKXS01008270.1 | 734   | 0.40 |
| <i>H. heptaphyllus</i> | NKXS01008270.1 | 766   | 0.40 |
| <i>H. heptaphyllus</i> | NKXS01008300.1 | 10078 | 0.40 |
| <i>H. heptaphyllus</i> | NKXS01008372.1 | 9655  | 0.40 |
| <i>H. heptaphyllus</i> | NKXS01008372.1 | 9707  | 0.40 |
| <i>H. heptaphyllus</i> | NKXS01008397.1 | 3223  | 0.40 |
| <i>H. heptaphyllus</i> | NKXS01008424.1 | 8569  | 0.40 |
| <i>H. heptaphyllus</i> | NKXS01008444.1 | 16233 | 0.40 |
| <i>H. heptaphyllus</i> | NKXS01008498.1 | 13813 | 0.40 |
| <i>H. heptaphyllus</i> | NKXS01008530.1 | 17022 | 0.40 |
| <i>H. heptaphyllus</i> | NKXS01008535.1 | 576   | 0.40 |
| <i>H. heptaphyllus</i> | NKXS01008535.1 | 587   | 0.40 |

|                        |                |       |      |
|------------------------|----------------|-------|------|
| <i>H. heptaphyllus</i> | NKXS01008732.1 | 9866  | 0.40 |
| <i>H. heptaphyllus</i> | NKXS01008820.1 | 6624  | 0.40 |
| <i>H. heptaphyllus</i> | NKXS01008860.1 | 4874  | 0.40 |
| <i>H. heptaphyllus</i> | NKXS01008881.1 | 11304 | 0.40 |
| <i>H. heptaphyllus</i> | NKXS01008935.1 | 9615  | 0.40 |
| <i>H. heptaphyllus</i> | NKXS01008935.1 | 9716  | 0.40 |
| <i>H. heptaphyllus</i> | NKXS01008935.1 | 9745  | 0.40 |
| <i>H. heptaphyllus</i> | NKXS01008955.1 | 13584 | 0.40 |
| <i>H. heptaphyllus</i> | NKXS01008955.1 | 13754 | 0.40 |
| <i>H. heptaphyllus</i> | NKXS01008955.1 | 13815 | 0.40 |
| <i>H. heptaphyllus</i> | NKXS01008955.1 | 13826 | 0.40 |
| <i>H. heptaphyllus</i> | NKXS01008985.1 | 9843  | 0.40 |
| <i>H. heptaphyllus</i> | NKXS01009034.1 | 8830  | 0.40 |
| <i>H. heptaphyllus</i> | NKXS01009072.1 | 7469  | 0.40 |
| <i>H. heptaphyllus</i> | NKXS01009188.1 | 8964  | 0.40 |
| <i>H. heptaphyllus</i> | NKXS01009272.1 | 12229 | 0.40 |
| <i>H. heptaphyllus</i> | NKXS01009549.1 | 340   | 0.40 |
| <i>H. heptaphyllus</i> | NKXS01009604.1 | 5367  | 0.40 |
| <i>H. heptaphyllus</i> | NKXS01009604.1 | 5396  | 0.40 |
| <i>H. heptaphyllus</i> | NKXS01009604.1 | 5409  | 0.40 |
| <i>H. heptaphyllus</i> | NKXS01009604.1 | 5493  | 0.40 |
| <i>H. heptaphyllus</i> | NKXS01009604.1 | 5526  | 0.40 |
| <i>H. heptaphyllus</i> | NKXS01009604.1 | 5577  | 0.40 |
| <i>H. heptaphyllus</i> | NKXS01009757.1 | 2118  | 0.40 |
| <i>H. heptaphyllus</i> | NKXS01009757.1 | 2127  | 0.40 |
| <i>H. heptaphyllus</i> | NKXS01009757.1 | 2236  | 0.40 |
| <i>H. heptaphyllus</i> | NKXS01009797.1 | 5421  | 0.40 |
| <i>H. heptaphyllus</i> | NKXS01009959.1 | 2862  | 0.40 |
| <i>H. heptaphyllus</i> | NKXS01010285.1 | 26    | 0.40 |
| <i>H. heptaphyllus</i> | NKXS01010285.1 | 61    | 0.40 |
| <i>H. heptaphyllus</i> | NKXS01010285.1 | 82    | 0.40 |
| <i>H. heptaphyllus</i> | NKXS01010285.1 | 107   | 0.40 |
| <i>H. heptaphyllus</i> | NKXS01010359.1 | 4566  | 0.40 |
| <i>H. heptaphyllus</i> | NKXS01010359.1 | 4713  | 0.40 |
| <i>H. heptaphyllus</i> | NKXS01010403.1 | 3547  | 0.40 |
| <i>H. heptaphyllus</i> | NKXS01010574.1 | 940   | 0.40 |
| <i>H. heptaphyllus</i> | NKXS01010574.1 | 1139  | 0.40 |
| <i>H. heptaphyllus</i> | NKXS01010652.1 | 5698  | 0.40 |
| <i>H. heptaphyllus</i> | NKXS01010721.1 | 1372  | 0.40 |
| <i>H. heptaphyllus</i> | NKXS01010783.1 | 2869  | 0.40 |
| <i>H. heptaphyllus</i> | NKXS01012054.1 | 291   | 0.40 |
| <i>H. heptaphyllus</i> | NKXS01012054.1 | 382   | 0.40 |
| <i>H. heptaphyllus</i> | NKXS01012054.1 | 491   | 0.40 |
| <i>H. heptaphyllus</i> | NKXS01012469.1 | 331   | 0.40 |

|                        |                |        |      |
|------------------------|----------------|--------|------|
| <i>H. heptaphyllus</i> | NKXS01012469.1 | 335    | 0.40 |
| <i>H. heptaphyllus</i> | NKXS01012469.1 | 512    | 0.40 |
| <i>H. heptaphyllus</i> | NKXS01012469.1 | 890    | 0.40 |
| <i>H. heptaphyllus</i> | NKXS01012469.1 | 893    | 0.40 |
| <i>H. heptaphyllus</i> | NKXS01012469.1 | 906    | 0.40 |
| <i>H. heptaphyllus</i> | NKXS01012469.1 | 970    | 0.40 |
| <i>H. heptaphyllus</i> | NKXS01012469.1 | 986    | 0.40 |
| <i>H. heptaphyllus</i> | NKXS01012469.1 | 1009   | 0.40 |
| <i>H. heptaphyllus</i> | NKXS01012469.1 | 1070   | 0.40 |
| <i>H. heptaphyllus</i> | NKXS01012469.1 | 1091   | 0.40 |
| <i>H. heptaphyllus</i> | NKXS01012469.1 | 1131   | 0.40 |
| <i>H. heptaphyllus</i> | NKXS01012523.1 | 934    | 0.40 |
| <i>H. heptaphyllus</i> | NKXS01000002.1 | 411286 | 0.20 |
| <i>H. heptaphyllus</i> | NKXS01000002.1 | 411393 | 0.20 |
| <i>H. heptaphyllus</i> | NKXS01000002.1 | 411417 | 0.20 |
| <i>H. heptaphyllus</i> | NKXS01000003.1 | 5916   | 0.20 |
| <i>H. heptaphyllus</i> | NKXS01000006.1 | 31263  | 0.20 |
| <i>H. heptaphyllus</i> | NKXS01000006.1 | 229584 | 0.20 |
| <i>H. heptaphyllus</i> | NKXS01000008.1 | 106620 | 0.20 |
| <i>H. heptaphyllus</i> | NKXS01000014.1 | 495995 | 0.20 |
| <i>H. heptaphyllus</i> | NKXS01000015.1 | 30614  | 0.20 |
| <i>H. heptaphyllus</i> | NKXS01000015.1 | 30766  | 0.20 |
| <i>H. heptaphyllus</i> | NKXS01000017.1 | 89761  | 0.20 |
| <i>H. heptaphyllus</i> | NKXS01000017.1 | 89769  | 0.20 |
| <i>H. heptaphyllus</i> | NKXS01000017.1 | 89910  | 0.20 |
| <i>H. heptaphyllus</i> | NKXS01000017.1 | 89911  | 0.20 |
| <i>H. heptaphyllus</i> | NKXS01000017.1 | 89941  | 0.20 |
| <i>H. heptaphyllus</i> | NKXS01000017.1 | 89971  | 0.20 |
| <i>H. heptaphyllus</i> | NKXS01000017.1 | 89986  | 0.20 |
| <i>H. heptaphyllus</i> | NKXS01000017.1 | 89990  | 0.20 |
| <i>H. heptaphyllus</i> | NKXS01000017.1 | 167483 | 0.20 |
| <i>H. heptaphyllus</i> | NKXS01000021.1 | 211192 | 0.20 |
| <i>H. heptaphyllus</i> | NKXS01000021.1 | 211273 | 0.20 |
| <i>H. heptaphyllus</i> | NKXS01000030.1 | 357774 | 0.20 |
| <i>H. heptaphyllus</i> | NKXS01000030.1 | 357813 | 0.20 |
| <i>H. heptaphyllus</i> | NKXS01000030.1 | 357853 | 0.20 |
| <i>H. heptaphyllus</i> | NKXS01000030.1 | 357886 | 0.20 |
| <i>H. heptaphyllus</i> | NKXS01000036.1 | 86359  | 0.20 |
| <i>H. heptaphyllus</i> | NKXS01000039.1 | 83737  | 0.20 |
| <i>H. heptaphyllus</i> | NKXS01000041.1 | 281453 | 0.20 |
| <i>H. heptaphyllus</i> | NKXS01000041.1 | 281469 | 0.20 |
| <i>H. heptaphyllus</i> | NKXS01000041.1 | 281548 | 0.20 |
| <i>H. heptaphyllus</i> | NKXS01000041.1 | 281551 | 0.20 |
| <i>H. heptaphyllus</i> | NKXS01000043.1 | 23762  | 0.20 |

|                        |                |        |      |
|------------------------|----------------|--------|------|
| <i>H. heptaphyllus</i> | NKXS01000050.1 | 217540 | 0.20 |
| <i>H. heptaphyllus</i> | NKXS01000050.1 | 217696 | 0.20 |
| <i>H. heptaphyllus</i> | NKXS01000051.1 | 54925  | 0.20 |
| <i>H. heptaphyllus</i> | NKXS01000053.1 | 205811 | 0.20 |
| <i>H. heptaphyllus</i> | NKXS01000055.1 | 166047 | 0.20 |
| <i>H. heptaphyllus</i> | NKXS01000059.1 | 246723 | 0.20 |
| <i>H. heptaphyllus</i> | NKXS01000059.1 | 246733 | 0.20 |
| <i>H. heptaphyllus</i> | NKXS01000067.1 | 4824   | 0.20 |
| <i>H. heptaphyllus</i> | NKXS01000068.1 | 194410 | 0.20 |
| <i>H. heptaphyllus</i> | NKXS01000075.1 | 48281  | 0.20 |
| <i>H. heptaphyllus</i> | NKXS01000079.1 | 38036  | 0.20 |
| <i>H. heptaphyllus</i> | NKXS01000087.1 | 12641  | 0.20 |
| <i>H. heptaphyllus</i> | NKXS01000087.1 | 12765  | 0.20 |
| <i>H. heptaphyllus</i> | NKXS01000087.1 | 12780  | 0.20 |
| <i>H. heptaphyllus</i> | NKXS01000087.1 | 14597  | 0.20 |
| <i>H. heptaphyllus</i> | NKXS01000087.1 | 14626  | 0.20 |
| <i>H. heptaphyllus</i> | NKXS01000087.1 | 14638  | 0.20 |
| <i>H. heptaphyllus</i> | NKXS01000087.1 | 14659  | 0.20 |
| <i>H. heptaphyllus</i> | NKXS01000087.1 | 14682  | 0.20 |
| <i>H. heptaphyllus</i> | NKXS01000087.1 | 14708  | 0.20 |
| <i>H. heptaphyllus</i> | NKXS01000087.1 | 14726  | 0.20 |
| <i>H. heptaphyllus</i> | NKXS01000090.1 | 83703  | 0.20 |
| <i>H. heptaphyllus</i> | NKXS01000090.1 | 83738  | 0.20 |
| <i>H. heptaphyllus</i> | NKXS01000094.1 | 113197 | 0.20 |
| <i>H. heptaphyllus</i> | NKXS01000097.1 | 154776 | 0.20 |
| <i>H. heptaphyllus</i> | NKXS01000105.1 | 13111  | 0.20 |
| <i>H. heptaphyllus</i> | NKXS01000105.1 | 15159  | 0.20 |
| <i>H. heptaphyllus</i> | NKXS01000105.1 | 15173  | 0.20 |
| <i>H. heptaphyllus</i> | NKXS01000109.1 | 80514  | 0.20 |
| <i>H. heptaphyllus</i> | NKXS01000123.1 | 199818 | 0.20 |
| <i>H. heptaphyllus</i> | NKXS01000128.1 | 43925  | 0.20 |
| <i>H. heptaphyllus</i> | NKXS01000132.1 | 140440 | 0.20 |
| <i>H. heptaphyllus</i> | NKXS01000132.1 | 140446 | 0.20 |
| <i>H. heptaphyllus</i> | NKXS01000132.1 | 140455 | 0.20 |
| <i>H. heptaphyllus</i> | NKXS01000132.1 | 140478 | 0.20 |
| <i>H. heptaphyllus</i> | NKXS01000149.1 | 95512  | 0.20 |
| <i>H. heptaphyllus</i> | NKXS01000149.1 | 95671  | 0.20 |
| <i>H. heptaphyllus</i> | NKXS01000149.1 | 101777 | 0.20 |
| <i>H. heptaphyllus</i> | NKXS01000149.1 | 102715 | 0.20 |
| <i>H. heptaphyllus</i> | NKXS01000152.1 | 18539  | 0.20 |
| <i>H. heptaphyllus</i> | NKXS01000160.1 | 148729 | 0.20 |
| <i>H. heptaphyllus</i> | NKXS01000160.1 | 219637 | 0.20 |
| <i>H. heptaphyllus</i> | NKXS01000167.1 | 198650 | 0.20 |
| <i>H. heptaphyllus</i> | NKXS01000167.1 | 198720 | 0.20 |

|                        |                |        |      |
|------------------------|----------------|--------|------|
| <i>H. heptaphyllus</i> | NKXS01000167.1 | 198722 | 0.20 |
| <i>H. heptaphyllus</i> | NKXS01000167.1 | 198775 | 0.20 |
| <i>H. heptaphyllus</i> | NKXS01000167.1 | 198777 | 0.20 |
| <i>H. heptaphyllus</i> | NKXS01000167.1 | 198792 | 0.20 |
| <i>H. heptaphyllus</i> | NKXS01000167.1 | 198855 | 0.20 |
| <i>H. heptaphyllus</i> | NKXS01000167.1 | 198870 | 0.20 |
| <i>H. heptaphyllus</i> | NKXS01000167.1 | 198889 | 0.20 |
| <i>H. heptaphyllus</i> | NKXS01000175.1 | 58166  | 0.20 |
| <i>H. heptaphyllus</i> | NKXS01000175.1 | 79589  | 0.20 |
| <i>H. heptaphyllus</i> | NKXS01000176.1 | 102053 | 0.20 |
| <i>H. heptaphyllus</i> | NKXS01000186.1 | 24901  | 0.20 |
| <i>H. heptaphyllus</i> | NKXS01000186.1 | 25651  | 0.20 |
| <i>H. heptaphyllus</i> | NKXS01000186.1 | 25652  | 0.20 |
| <i>H. heptaphyllus</i> | NKXS01000186.1 | 25696  | 0.20 |
| <i>H. heptaphyllus</i> | NKXS01000188.1 | 304080 | 0.20 |
| <i>H. heptaphyllus</i> | NKXS01000188.1 | 304114 | 0.20 |
| <i>H. heptaphyllus</i> | NKXS01000188.1 | 304139 | 0.20 |
| <i>H. heptaphyllus</i> | NKXS01000188.1 | 304160 | 0.20 |
| <i>H. heptaphyllus</i> | NKXS01000188.1 | 304168 | 0.20 |
| <i>H. heptaphyllus</i> | NKXS01000188.1 | 304221 | 0.20 |
| <i>H. heptaphyllus</i> | NKXS01000189.1 | 60526  | 0.20 |
| <i>H. heptaphyllus</i> | NKXS01000189.1 | 60550  | 0.20 |
| <i>H. heptaphyllus</i> | NKXS01000189.1 | 123613 | 0.20 |
| <i>H. heptaphyllus</i> | NKXS01000189.1 | 123661 | 0.20 |
| <i>H. heptaphyllus</i> | NKXS01000194.1 | 56416  | 0.20 |
| <i>H. heptaphyllus</i> | NKXS01000211.1 | 180446 | 0.20 |
| <i>H. heptaphyllus</i> | NKXS01000218.1 | 110391 | 0.20 |
| <i>H. heptaphyllus</i> | NKXS01000218.1 | 210211 | 0.20 |
| <i>H. heptaphyllus</i> | NKXS01000241.1 | 186134 | 0.20 |
| <i>H. heptaphyllus</i> | NKXS01000241.1 | 186161 | 0.20 |
| <i>H. heptaphyllus</i> | NKXS01000241.1 | 186267 | 0.20 |
| <i>H. heptaphyllus</i> | NKXS01000241.1 | 192843 | 0.20 |
| <i>H. heptaphyllus</i> | NKXS01000253.1 | 99178  | 0.20 |
| <i>H. heptaphyllus</i> | NKXS01000253.1 | 99295  | 0.20 |
| <i>H. heptaphyllus</i> | NKXS01000263.1 | 7567   | 0.20 |
| <i>H. heptaphyllus</i> | NKXS01000288.1 | 125012 | 0.20 |
| <i>H. heptaphyllus</i> | NKXS01000288.1 | 125039 | 0.20 |
| <i>H. heptaphyllus</i> | NKXS01000290.1 | 129323 | 0.20 |
| <i>H. heptaphyllus</i> | NKXS01000298.1 | 171778 | 0.20 |
| <i>H. heptaphyllus</i> | NKXS01000303.1 | 2567   | 0.20 |
| <i>H. heptaphyllus</i> | NKXS01000309.1 | 186965 | 0.20 |
| <i>H. heptaphyllus</i> | NKXS01000309.1 | 187098 | 0.20 |
| <i>H. heptaphyllus</i> | NKXS01000316.1 | 15602  | 0.20 |
| <i>H. heptaphyllus</i> | NKXS01000321.1 | 120471 | 0.20 |



|                        |                |        |      |
|------------------------|----------------|--------|------|
| <i>H. heptaphyllus</i> | NKXS01000321.1 | 120523 | 0.20 |
| <i>H. heptaphyllus</i> | NKXS01000321.1 | 120535 | 0.20 |
| <i>H. heptaphyllus</i> | NKXS01000321.1 | 120547 | 0.20 |
| <i>H. heptaphyllus</i> | NKXS01000325.1 | 8493   | 0.20 |
| <i>H. heptaphyllus</i> | NKXS01000344.1 | 43300  | 0.20 |
| <i>H. heptaphyllus</i> | NKXS01000353.1 | 4068   | 0.20 |
| <i>H. heptaphyllus</i> | NKXS01000353.1 | 4089   | 0.20 |
| <i>H. heptaphyllus</i> | NKXS01000353.1 | 11013  | 0.20 |
| <i>H. heptaphyllus</i> | NKXS01000353.1 | 11032  | 0.20 |
| <i>H. heptaphyllus</i> | NKXS01000353.1 | 11228  | 0.20 |
| <i>H. heptaphyllus</i> | NKXS01000353.1 | 159101 | 0.20 |
| <i>H. heptaphyllus</i> | NKXS01000353.1 | 159108 | 0.20 |
| <i>H. heptaphyllus</i> | NKXS01000353.1 | 159139 | 0.20 |
| <i>H. heptaphyllus</i> | NKXS01000353.1 | 159276 | 0.20 |
| <i>H. heptaphyllus</i> | NKXS01000364.1 | 30205  | 0.20 |
| <i>H. heptaphyllus</i> | NKXS01000364.1 | 31312  | 0.20 |
| <i>H. heptaphyllus</i> | NKXS01000364.1 | 110954 | 0.20 |
| <i>H. heptaphyllus</i> | NKXS01000364.1 | 111001 | 0.20 |
| <i>H. heptaphyllus</i> | NKXS01000371.1 | 62993  | 0.20 |
| <i>H. heptaphyllus</i> | NKXS01000375.1 | 166923 | 0.20 |
| <i>H. heptaphyllus</i> | NKXS01000382.1 | 151656 | 0.20 |
| <i>H. heptaphyllus</i> | NKXS01000382.1 | 194194 | 0.20 |
| <i>H. heptaphyllus</i> | NKXS01000383.1 | 100671 | 0.20 |
| <i>H. heptaphyllus</i> | NKXS01000383.1 | 100674 | 0.20 |
| <i>H. heptaphyllus</i> | NKXS01000385.1 | 42614  | 0.20 |
| <i>H. heptaphyllus</i> | NKXS01000385.1 | 42652  | 0.20 |
| <i>H. heptaphyllus</i> | NKXS01000387.1 | 179909 | 0.20 |
| <i>H. heptaphyllus</i> | NKXS01000387.1 | 180009 | 0.20 |
| <i>H. heptaphyllus</i> | NKXS01000390.1 | 2515   | 0.20 |
| <i>H. heptaphyllus</i> | NKXS01000397.1 | 274    | 0.20 |
| <i>H. heptaphyllus</i> | NKXS01000402.1 | 64250  | 0.20 |
| <i>H. heptaphyllus</i> | NKXS01000402.1 | 64333  | 0.20 |
| <i>H. heptaphyllus</i> | NKXS01000420.1 | 149214 | 0.20 |
| <i>H. heptaphyllus</i> | NKXS01000433.1 | 22535  | 0.20 |
| <i>H. heptaphyllus</i> | NKXS01000433.1 | 22548  | 0.20 |
| <i>H. heptaphyllus</i> | NKXS01000443.1 | 75192  | 0.20 |
| <i>H. heptaphyllus</i> | NKXS01000443.1 | 75296  | 0.20 |
| <i>H. heptaphyllus</i> | NKXS01000450.1 | 15206  | 0.20 |
| <i>H. heptaphyllus</i> | NKXS01000450.1 | 15332  | 0.20 |
| <i>H. heptaphyllus</i> | NKXS01000450.1 | 15347  | 0.20 |
| <i>H. heptaphyllus</i> | NKXS01000450.1 | 15366  | 0.20 |
| <i>H. heptaphyllus</i> | NKXS01000450.1 | 15380  | 0.20 |
| <i>H. heptaphyllus</i> | NKXS01000455.1 | 123566 | 0.20 |
| <i>H. heptaphyllus</i> | NKXS01000455.1 | 123684 | 0.20 |

|                        |                |        |      |
|------------------------|----------------|--------|------|
| <i>H. heptaphyllus</i> | NKXS01000455.1 | 123687 | 0.20 |
| <i>H. heptaphyllus</i> | NKXS01000464.1 | 21666  | 0.20 |
| <i>H. heptaphyllus</i> | NKXS01000468.1 | 10587  | 0.20 |
| <i>H. heptaphyllus</i> | NKXS01000474.1 | 20292  | 0.20 |
| <i>H. heptaphyllus</i> | NKXS01000474.1 | 20296  | 0.20 |
| <i>H. heptaphyllus</i> | NKXS01000474.1 | 20327  | 0.20 |
| <i>H. heptaphyllus</i> | NKXS01000474.1 | 20333  | 0.20 |
| <i>H. heptaphyllus</i> | NKXS01000474.1 | 20335  | 0.20 |
| <i>H. heptaphyllus</i> | NKXS01000474.1 | 20361  | 0.20 |
| <i>H. heptaphyllus</i> | NKXS01000474.1 | 20377  | 0.20 |
| <i>H. heptaphyllus</i> | NKXS01000474.1 | 165599 | 0.20 |
| <i>H. heptaphyllus</i> | NKXS01000483.1 | 2617   | 0.20 |
| <i>H. heptaphyllus</i> | NKXS01000483.1 | 2680   | 0.20 |
| <i>H. heptaphyllus</i> | NKXS01000483.1 | 2726   | 0.20 |
| <i>H. heptaphyllus</i> | NKXS01000484.1 | 137431 | 0.20 |
| <i>H. heptaphyllus</i> | NKXS01000487.1 | 107190 | 0.20 |
| <i>H. heptaphyllus</i> | NKXS01000490.1 | 5481   | 0.20 |
| <i>H. heptaphyllus</i> | NKXS01000494.1 | 29656  | 0.20 |
| <i>H. heptaphyllus</i> | NKXS01000494.1 | 29682  | 0.20 |
| <i>H. heptaphyllus</i> | NKXS01000503.1 | 68533  | 0.20 |
| <i>H. heptaphyllus</i> | NKXS01000505.1 | 92092  | 0.20 |
| <i>H. heptaphyllus</i> | NKXS01000505.1 | 150588 | 0.20 |
| <i>H. heptaphyllus</i> | NKXS01000517.1 | 130068 | 0.20 |
| <i>H. heptaphyllus</i> | NKXS01000520.1 | 88645  | 0.20 |
| <i>H. heptaphyllus</i> | NKXS01000520.1 | 88689  | 0.20 |
| <i>H. heptaphyllus</i> | NKXS01000521.1 | 4782   | 0.20 |
| <i>H. heptaphyllus</i> | NKXS01000538.1 | 78333  | 0.20 |
| <i>H. heptaphyllus</i> | NKXS01000546.1 | 25169  | 0.20 |
| <i>H. heptaphyllus</i> | NKXS01000550.1 | 17650  | 0.20 |
| <i>H. heptaphyllus</i> | NKXS01000558.1 | 186603 | 0.20 |
| <i>H. heptaphyllus</i> | NKXS01000562.1 | 56558  | 0.20 |
| <i>H. heptaphyllus</i> | NKXS01000562.1 | 56570  | 0.20 |
| <i>H. heptaphyllus</i> | NKXS01000562.1 | 56580  | 0.20 |
| <i>H. heptaphyllus</i> | NKXS01000562.1 | 56587  | 0.20 |
| <i>H. heptaphyllus</i> | NKXS01000562.1 | 56590  | 0.20 |
| <i>H. heptaphyllus</i> | NKXS01000562.1 | 56688  | 0.20 |
| <i>H. heptaphyllus</i> | NKXS01000562.1 | 56703  | 0.20 |
| <i>H. heptaphyllus</i> | NKXS01000568.1 | 117010 | 0.20 |
| <i>H. heptaphyllus</i> | NKXS01000568.1 | 117078 | 0.20 |
| <i>H. heptaphyllus</i> | NKXS01000576.1 | 79937  | 0.20 |
| <i>H. heptaphyllus</i> | NKXS01000576.1 | 80036  | 0.20 |
| <i>H. heptaphyllus</i> | NKXS01000581.1 | 113926 | 0.20 |
| <i>H. heptaphyllus</i> | NKXS01000581.1 | 128750 | 0.20 |
| <i>H. heptaphyllus</i> | NKXS01000581.1 | 128765 | 0.20 |

|                        |                |        |      |
|------------------------|----------------|--------|------|
| <i>H. heptaphyllus</i> | NKXS01000582.1 | 68596  | 0.20 |
| <i>H. heptaphyllus</i> | NKXS01000586.1 | 53935  | 0.20 |
| <i>H. heptaphyllus</i> | NKXS01000602.1 | 75174  | 0.20 |
| <i>H. heptaphyllus</i> | NKXS01000602.1 | 150057 | 0.20 |
| <i>H. heptaphyllus</i> | NKXS01000602.1 | 150118 | 0.20 |
| <i>H. heptaphyllus</i> | NKXS01000603.1 | 79006  | 0.20 |
| <i>H. heptaphyllus</i> | NKXS01000603.1 | 79144  | 0.20 |
| <i>H. heptaphyllus</i> | NKXS01000603.1 | 79171  | 0.20 |
| <i>H. heptaphyllus</i> | NKXS01000603.1 | 79197  | 0.20 |
| <i>H. heptaphyllus</i> | NKXS01000603.1 | 95164  | 0.20 |
| <i>H. heptaphyllus</i> | NKXS01000610.1 | 45043  | 0.20 |
| <i>H. heptaphyllus</i> | NKXS01000640.1 | 9329   | 0.20 |
| <i>H. heptaphyllus</i> | NKXS01000649.1 | 86712  | 0.20 |
| <i>H. heptaphyllus</i> | NKXS01000649.1 | 86744  | 0.20 |
| <i>H. heptaphyllus</i> | NKXS01000654.1 | 39177  | 0.20 |
| <i>H. heptaphyllus</i> | NKXS01000654.1 | 39228  | 0.20 |
| <i>H. heptaphyllus</i> | NKXS01000654.1 | 39343  | 0.20 |
| <i>H. heptaphyllus</i> | NKXS01000662.1 | 10696  | 0.20 |
| <i>H. heptaphyllus</i> | NKXS01000669.1 | 11222  | 0.20 |
| <i>H. heptaphyllus</i> | NKXS01000669.1 | 11287  | 0.20 |
| <i>H. heptaphyllus</i> | NKXS01000669.1 | 11334  | 0.20 |
| <i>H. heptaphyllus</i> | NKXS01000669.1 | 11355  | 0.20 |
| <i>H. heptaphyllus</i> | NKXS01000699.1 | 166281 | 0.20 |
| <i>H. heptaphyllus</i> | NKXS01000702.1 | 17094  | 0.20 |
| <i>H. heptaphyllus</i> | NKXS01000716.1 | 26007  | 0.20 |
| <i>H. heptaphyllus</i> | NKXS01000718.1 | 77965  | 0.20 |
| <i>H. heptaphyllus</i> | NKXS01000719.1 | 153156 | 0.20 |
| <i>H. heptaphyllus</i> | NKXS01000720.1 | 50379  | 0.20 |
| <i>H. heptaphyllus</i> | NKXS01000731.1 | 149575 | 0.20 |
| <i>H. heptaphyllus</i> | NKXS01000731.1 | 149602 | 0.20 |
| <i>H. heptaphyllus</i> | NKXS01000734.1 | 69277  | 0.20 |
| <i>H. heptaphyllus</i> | NKXS01000734.1 | 69334  | 0.20 |
| <i>H. heptaphyllus</i> | NKXS01000737.1 | 4417   | 0.20 |
| <i>H. heptaphyllus</i> | NKXS01000758.1 | 70675  | 0.20 |
| <i>H. heptaphyllus</i> | NKXS01000758.1 | 70736  | 0.20 |
| <i>H. heptaphyllus</i> | NKXS01000758.1 | 70805  | 0.20 |
| <i>H. heptaphyllus</i> | NKXS01000775.1 | 83027  | 0.20 |
| <i>H. heptaphyllus</i> | NKXS01000775.1 | 111647 | 0.20 |
| <i>H. heptaphyllus</i> | NKXS01000775.1 | 123194 | 0.20 |
| <i>H. heptaphyllus</i> | NKXS01000775.1 | 123358 | 0.20 |
| <i>H. heptaphyllus</i> | NKXS01000804.1 | 95424  | 0.20 |
| <i>H. heptaphyllus</i> | NKXS01000822.1 | 1373   | 0.20 |
| <i>H. heptaphyllus</i> | NKXS01000824.1 | 22974  | 0.20 |
| <i>H. heptaphyllus</i> | NKXS01000835.1 | 2918   | 0.20 |

|                        |                |        |      |
|------------------------|----------------|--------|------|
| <i>H. heptaphyllus</i> | NKXS01000835.1 | 2940   | 0.20 |
| <i>H. heptaphyllus</i> | NKXS01000835.1 | 3092   | 0.20 |
| <i>H. heptaphyllus</i> | NKXS01000835.1 | 3113   | 0.20 |
| <i>H. heptaphyllus</i> | NKXS01000835.1 | 8999   | 0.20 |
| <i>H. heptaphyllus</i> | NKXS01000835.1 | 9006   | 0.20 |
| <i>H. heptaphyllus</i> | NKXS01000835.1 | 9156   | 0.20 |
| <i>H. heptaphyllus</i> | NKXS01000835.1 | 9159   | 0.20 |
| <i>H. heptaphyllus</i> | NKXS01000835.1 | 9164   | 0.20 |
| <i>H. heptaphyllus</i> | NKXS01000838.1 | 166071 | 0.20 |
| <i>H. heptaphyllus</i> | NKXS01000838.1 | 166130 | 0.20 |
| <i>H. heptaphyllus</i> | NKXS01000838.1 | 166231 | 0.20 |
| <i>H. heptaphyllus</i> | NKXS01000845.1 | 79093  | 0.20 |
| <i>H. heptaphyllus</i> | NKXS01000852.1 | 102504 | 0.20 |
| <i>H. heptaphyllus</i> | NKXS01000852.1 | 102523 | 0.20 |
| <i>H. heptaphyllus</i> | NKXS01000852.1 | 102584 | 0.20 |
| <i>H. heptaphyllus</i> | NKXS01000852.1 | 107231 | 0.20 |
| <i>H. heptaphyllus</i> | NKXS01000852.1 | 107262 | 0.20 |
| <i>H. heptaphyllus</i> | NKXS01000852.1 | 107294 | 0.20 |
| <i>H. heptaphyllus</i> | NKXS01000852.1 | 107461 | 0.20 |
| <i>H. heptaphyllus</i> | NKXS01000852.1 | 107466 | 0.20 |
| <i>H. heptaphyllus</i> | NKXS01000852.1 | 109833 | 0.20 |
| <i>H. heptaphyllus</i> | NKXS01000852.1 | 110350 | 0.20 |
| <i>H. heptaphyllus</i> | NKXS01000852.1 | 110531 | 0.20 |
| <i>H. heptaphyllus</i> | NKXS01000852.1 | 118995 | 0.20 |
| <i>H. heptaphyllus</i> | NKXS01000852.1 | 119058 | 0.20 |
| <i>H. heptaphyllus</i> | NKXS01000852.1 | 119085 | 0.20 |
| <i>H. heptaphyllus</i> | NKXS01000854.1 | 51870  | 0.20 |
| <i>H. heptaphyllus</i> | NKXS01000863.1 | 36957  | 0.20 |
| <i>H. heptaphyllus</i> | NKXS01000863.1 | 130129 | 0.20 |
| <i>H. heptaphyllus</i> | NKXS01000863.1 | 130173 | 0.20 |
| <i>H. heptaphyllus</i> | NKXS01000863.1 | 130201 | 0.20 |
| <i>H. heptaphyllus</i> | NKXS01000863.1 | 154083 | 0.20 |
| <i>H. heptaphyllus</i> | NKXS01000863.1 | 154165 | 0.20 |
| <i>H. heptaphyllus</i> | NKXS01000866.1 | 49656  | 0.20 |
| <i>H. heptaphyllus</i> | NKXS01000867.1 | 93516  | 0.20 |
| <i>H. heptaphyllus</i> | NKXS01000867.1 | 95817  | 0.20 |
| <i>H. heptaphyllus</i> | NKXS01000877.1 | 93955  | 0.20 |
| <i>H. heptaphyllus</i> | NKXS01000877.1 | 142482 | 0.20 |
| <i>H. heptaphyllus</i> | NKXS01000881.1 | 29182  | 0.20 |
| <i>H. heptaphyllus</i> | NKXS01000882.1 | 113429 | 0.20 |
| <i>H. heptaphyllus</i> | NKXS01000889.1 | 2435   | 0.20 |
| <i>H. heptaphyllus</i> | NKXS01000891.1 | 15974  | 0.20 |
| <i>H. heptaphyllus</i> | NKXS01000891.1 | 36053  | 0.20 |
| <i>H. heptaphyllus</i> | NKXS01000891.1 | 36181  | 0.20 |

|                        |                |        |      |
|------------------------|----------------|--------|------|
| <i>H. heptaphyllus</i> | NKXS01000891.1 | 36265  | 0.20 |
| <i>H. heptaphyllus</i> | NKXS01000891.1 | 36287  | 0.20 |
| <i>H. heptaphyllus</i> | NKXS01000893.1 | 75519  | 0.20 |
| <i>H. heptaphyllus</i> | NKXS01000893.1 | 75522  | 0.20 |
| <i>H. heptaphyllus</i> | NKXS01000893.1 | 75682  | 0.20 |
| <i>H. heptaphyllus</i> | NKXS01000893.1 | 98433  | 0.20 |
| <i>H. heptaphyllus</i> | NKXS01000901.1 | 181824 | 0.20 |
| <i>H. heptaphyllus</i> | NKXS01000901.1 | 181853 | 0.20 |
| <i>H. heptaphyllus</i> | NKXS01000901.1 | 182028 | 0.20 |
| <i>H. heptaphyllus</i> | NKXS01000901.1 | 189656 | 0.20 |
| <i>H. heptaphyllus</i> | NKXS01000904.1 | 213596 | 0.20 |
| <i>H. heptaphyllus</i> | NKXS01000905.1 | 47246  | 0.20 |
| <i>H. heptaphyllus</i> | NKXS01000905.1 | 97049  | 0.20 |
| <i>H. heptaphyllus</i> | NKXS01000905.1 | 97162  | 0.20 |
| <i>H. heptaphyllus</i> | NKXS01000905.1 | 141451 | 0.20 |
| <i>H. heptaphyllus</i> | NKXS01000905.1 | 141469 | 0.20 |
| <i>H. heptaphyllus</i> | NKXS01000905.1 | 141647 | 0.20 |
| <i>H. heptaphyllus</i> | NKXS01000905.1 | 141662 | 0.20 |
| <i>H. heptaphyllus</i> | NKXS01000905.1 | 141667 | 0.20 |
| <i>H. heptaphyllus</i> | NKXS01000911.1 | 113529 | 0.20 |
| <i>H. heptaphyllus</i> | NKXS01000919.1 | 35056  | 0.20 |
| <i>H. heptaphyllus</i> | NKXS01000919.1 | 35059  | 0.20 |
| <i>H. heptaphyllus</i> | NKXS01000919.1 | 35162  | 0.20 |
| <i>H. heptaphyllus</i> | NKXS01000919.1 | 35282  | 0.20 |
| <i>H. heptaphyllus</i> | NKXS01000936.1 | 76888  | 0.20 |
| <i>H. heptaphyllus</i> | NKXS01000945.1 | 34676  | 0.20 |
| <i>H. heptaphyllus</i> | NKXS01000952.1 | 76574  | 0.20 |
| <i>H. heptaphyllus</i> | NKXS01000990.1 | 25335  | 0.20 |
| <i>H. heptaphyllus</i> | NKXS01000991.1 | 6045   | 0.20 |
| <i>H. heptaphyllus</i> | NKXS01000992.1 | 43042  | 0.20 |
| <i>H. heptaphyllus</i> | NKXS01000999.1 | 124194 | 0.20 |
| <i>H. heptaphyllus</i> | NKXS01001004.1 | 68341  | 0.20 |
| <i>H. heptaphyllus</i> | NKXS01001004.1 | 68349  | 0.20 |
| <i>H. heptaphyllus</i> | NKXS01001004.1 | 68395  | 0.20 |
| <i>H. heptaphyllus</i> | NKXS01001004.1 | 71246  | 0.20 |
| <i>H. heptaphyllus</i> | NKXS01001011.1 | 3486   | 0.20 |
| <i>H. heptaphyllus</i> | NKXS01001028.1 | 33174  | 0.20 |
| <i>H. heptaphyllus</i> | NKXS01001028.1 | 33256  | 0.20 |
| <i>H. heptaphyllus</i> | NKXS01001028.1 | 33313  | 0.20 |
| <i>H. heptaphyllus</i> | NKXS01001028.1 | 33374  | 0.20 |
| <i>H. heptaphyllus</i> | NKXS01001028.1 | 33379  | 0.20 |
| <i>H. heptaphyllus</i> | NKXS01001034.1 | 121667 | 0.20 |
| <i>H. heptaphyllus</i> | NKXS01001043.1 | 17004  | 0.20 |
| <i>H. heptaphyllus</i> | NKXS01001049.1 | 114210 | 0.20 |

|                        |                |        |      |
|------------------------|----------------|--------|------|
| <i>H. heptaphyllus</i> | NKXS01001049.1 | 114304 | 0.20 |
| <i>H. heptaphyllus</i> | NKXS01001062.1 | 91397  | 0.20 |
| <i>H. heptaphyllus</i> | NKXS01001062.1 | 123171 | 0.20 |
| <i>H. heptaphyllus</i> | NKXS01001062.1 | 123188 | 0.20 |
| <i>H. heptaphyllus</i> | NKXS01001062.1 | 181595 | 0.20 |
| <i>H. heptaphyllus</i> | NKXS01001062.1 | 181600 | 0.20 |
| <i>H. heptaphyllus</i> | NKXS01001068.1 | 81617  | 0.20 |
| <i>H. heptaphyllus</i> | NKXS01001068.1 | 81748  | 0.20 |
| <i>H. heptaphyllus</i> | NKXS01001074.1 | 212    | 0.20 |
| <i>H. heptaphyllus</i> | NKXS01001074.1 | 236    | 0.20 |
| <i>H. heptaphyllus</i> | NKXS01001074.1 | 332    | 0.20 |
| <i>H. heptaphyllus</i> | NKXS01001074.1 | 17287  | 0.20 |
| <i>H. heptaphyllus</i> | NKXS01001076.1 | 28755  | 0.20 |
| <i>H. heptaphyllus</i> | NKXS01001083.1 | 140093 | 0.20 |
| <i>H. heptaphyllus</i> | NKXS01001083.1 | 140094 | 0.20 |
| <i>H. heptaphyllus</i> | NKXS01001083.1 | 140118 | 0.20 |
| <i>H. heptaphyllus</i> | NKXS01001083.1 | 140137 | 0.20 |
| <i>H. heptaphyllus</i> | NKXS01001096.1 | 85958  | 0.20 |
| <i>H. heptaphyllus</i> | NKXS01001111.1 | 128310 | 0.20 |
| <i>H. heptaphyllus</i> | NKXS01001120.1 | 19215  | 0.20 |
| <i>H. heptaphyllus</i> | NKXS01001134.1 | 14407  | 0.20 |
| <i>H. heptaphyllus</i> | NKXS01001137.1 | 1377   | 0.20 |
| <i>H. heptaphyllus</i> | NKXS01001140.1 | 48774  | 0.20 |
| <i>H. heptaphyllus</i> | NKXS01001143.1 | 16510  | 0.20 |
| <i>H. heptaphyllus</i> | NKXS01001150.1 | 121077 | 0.20 |
| <i>H. heptaphyllus</i> | NKXS01001150.1 | 121094 | 0.20 |
| <i>H. heptaphyllus</i> | NKXS01001150.1 | 121101 | 0.20 |
| <i>H. heptaphyllus</i> | NKXS01001150.1 | 121162 | 0.20 |
| <i>H. heptaphyllus</i> | NKXS01001150.1 | 121245 | 0.20 |
| <i>H. heptaphyllus</i> | NKXS01001164.1 | 31980  | 0.20 |
| <i>H. heptaphyllus</i> | NKXS01001170.1 | 1100   | 0.20 |
| <i>H. heptaphyllus</i> | NKXS01001180.1 | 23144  | 0.20 |
| <i>H. heptaphyllus</i> | NKXS01001193.1 | 38826  | 0.20 |
| <i>H. heptaphyllus</i> | NKXS01001193.1 | 38980  | 0.20 |
| <i>H. heptaphyllus</i> | NKXS01001202.1 | 61877  | 0.20 |
| <i>H. heptaphyllus</i> | NKXS01001220.1 | 40722  | 0.20 |
| <i>H. heptaphyllus</i> | NKXS01001240.1 | 104988 | 0.20 |
| <i>H. heptaphyllus</i> | NKXS01001247.1 | 28283  | 0.20 |
| <i>H. heptaphyllus</i> | NKXS01001248.1 | 93133  | 0.20 |
| <i>H. heptaphyllus</i> | NKXS01001256.1 | 46706  | 0.20 |
| <i>H. heptaphyllus</i> | NKXS01001256.1 | 46834  | 0.20 |
| <i>H. heptaphyllus</i> | NKXS01001259.1 | 99758  | 0.20 |
| <i>H. heptaphyllus</i> | NKXS01001270.1 | 133236 | 0.20 |
| <i>H. heptaphyllus</i> | NKXS01001270.1 | 133364 | 0.20 |

|                        |                |        |      |
|------------------------|----------------|--------|------|
| <i>H. heptaphyllus</i> | NKXS01001270.1 | 133365 | 0.20 |
| <i>H. heptaphyllus</i> | NKXS01001274.1 | 48499  | 0.20 |
| <i>H. heptaphyllus</i> | NKXS01001274.1 | 48556  | 0.20 |
| <i>H. heptaphyllus</i> | NKXS01001274.1 | 48633  | 0.20 |
| <i>H. heptaphyllus</i> | NKXS01001289.1 | 3911   | 0.20 |
| <i>H. heptaphyllus</i> | NKXS01001289.1 | 12701  | 0.20 |
| <i>H. heptaphyllus</i> | NKXS01001289.1 | 55398  | 0.20 |
| <i>H. heptaphyllus</i> | NKXS01001292.1 | 20646  | 0.20 |
| <i>H. heptaphyllus</i> | NKXS01001293.1 | 75738  | 0.20 |
| <i>H. heptaphyllus</i> | NKXS01001293.1 | 75844  | 0.20 |
| <i>H. heptaphyllus</i> | NKXS01001293.1 | 75920  | 0.20 |
| <i>H. heptaphyllus</i> | NKXS01001293.1 | 75930  | 0.20 |
| <i>H. heptaphyllus</i> | NKXS01001293.1 | 75940  | 0.20 |
| <i>H. heptaphyllus</i> | NKXS01001293.1 | 75987  | 0.20 |
| <i>H. heptaphyllus</i> | NKXS01001293.1 | 76017  | 0.20 |
| <i>H. heptaphyllus</i> | NKXS01001301.1 | 127249 | 0.20 |
| <i>H. heptaphyllus</i> | NKXS01001301.1 | 127322 | 0.20 |
| <i>H. heptaphyllus</i> | NKXS01001307.1 | 22829  | 0.20 |
| <i>H. heptaphyllus</i> | NKXS01001307.1 | 93426  | 0.20 |
| <i>H. heptaphyllus</i> | NKXS01001308.1 | 29777  | 0.20 |
| <i>H. heptaphyllus</i> | NKXS01001309.1 | 36630  | 0.20 |
| <i>H. heptaphyllus</i> | NKXS01001311.1 | 42567  | 0.20 |
| <i>H. heptaphyllus</i> | NKXS01001314.1 | 64535  | 0.20 |
| <i>H. heptaphyllus</i> | NKXS01001314.1 | 137380 | 0.20 |
| <i>H. heptaphyllus</i> | NKXS01001318.1 | 113510 | 0.20 |
| <i>H. heptaphyllus</i> | NKXS01001328.1 | 60493  | 0.20 |
| <i>H. heptaphyllus</i> | NKXS01001328.1 | 60570  | 0.20 |
| <i>H. heptaphyllus</i> | NKXS01001329.1 | 96192  | 0.20 |
| <i>H. heptaphyllus</i> | NKXS01001333.1 | 7426   | 0.20 |
| <i>H. heptaphyllus</i> | NKXS01001333.1 | 115663 | 0.20 |
| <i>H. heptaphyllus</i> | NKXS01001344.1 | 108647 | 0.20 |
| <i>H. heptaphyllus</i> | NKXS01001366.1 | 33860  | 0.20 |
| <i>H. heptaphyllus</i> | NKXS01001366.1 | 33904  | 0.20 |
| <i>H. heptaphyllus</i> | NKXS01001366.1 | 33935  | 0.20 |
| <i>H. heptaphyllus</i> | NKXS01001366.1 | 34030  | 0.20 |
| <i>H. heptaphyllus</i> | NKXS01001366.1 | 37931  | 0.20 |
| <i>H. heptaphyllus</i> | NKXS01001366.1 | 37939  | 0.20 |
| <i>H. heptaphyllus</i> | NKXS01001375.1 | 54568  | 0.20 |
| <i>H. heptaphyllus</i> | NKXS01001392.1 | 1869   | 0.20 |
| <i>H. heptaphyllus</i> | NKXS01001398.1 | 82621  | 0.20 |
| <i>H. heptaphyllus</i> | NKXS01001401.1 | 47333  | 0.20 |
| <i>H. heptaphyllus</i> | NKXS01001401.1 | 78578  | 0.20 |
| <i>H. heptaphyllus</i> | NKXS01001404.1 | 24549  | 0.20 |
| <i>H. heptaphyllus</i> | NKXS01001408.1 | 28031  | 0.20 |

|                        |                |        |      |
|------------------------|----------------|--------|------|
| <i>H. heptaphyllus</i> | NKXS01001408.1 | 53663  | 0.20 |
| <i>H. heptaphyllus</i> | NKXS01001408.1 | 53787  | 0.20 |
| <i>H. heptaphyllus</i> | NKXS01001435.1 | 40091  | 0.20 |
| <i>H. heptaphyllus</i> | NKXS01001435.1 | 40325  | 0.20 |
| <i>H. heptaphyllus</i> | NKXS01001435.1 | 46384  | 0.20 |
| <i>H. heptaphyllus</i> | NKXS01001440.1 | 145892 | 0.20 |
| <i>H. heptaphyllus</i> | NKXS01001440.1 | 145967 | 0.20 |
| <i>H. heptaphyllus</i> | NKXS01001442.1 | 40036  | 0.20 |
| <i>H. heptaphyllus</i> | NKXS01001442.1 | 40039  | 0.20 |
| <i>H. heptaphyllus</i> | NKXS01001442.1 | 40042  | 0.20 |
| <i>H. heptaphyllus</i> | NKXS01001442.1 | 40127  | 0.20 |
| <i>H. heptaphyllus</i> | NKXS01001442.1 | 40196  | 0.20 |
| <i>H. heptaphyllus</i> | NKXS01001442.1 | 89359  | 0.20 |
| <i>H. heptaphyllus</i> | NKXS01001444.1 | 60614  | 0.20 |
| <i>H. heptaphyllus</i> | NKXS01001444.1 | 60785  | 0.20 |
| <i>H. heptaphyllus</i> | NKXS01001444.1 | 60831  | 0.20 |
| <i>H. heptaphyllus</i> | NKXS01001445.1 | 123178 | 0.20 |
| <i>H. heptaphyllus</i> | NKXS01001446.1 | 56326  | 0.20 |
| <i>H. heptaphyllus</i> | NKXS01001448.1 | 30618  | 0.20 |
| <i>H. heptaphyllus</i> | NKXS01001448.1 | 30684  | 0.20 |
| <i>H. heptaphyllus</i> | NKXS01001449.1 | 65902  | 0.20 |
| <i>H. heptaphyllus</i> | NKXS01001449.1 | 66029  | 0.20 |
| <i>H. heptaphyllus</i> | NKXS01001453.1 | 858    | 0.20 |
| <i>H. heptaphyllus</i> | NKXS01001457.1 | 19906  | 0.20 |
| <i>H. heptaphyllus</i> | NKXS01001464.1 | 41957  | 0.20 |
| <i>H. heptaphyllus</i> | NKXS01001471.1 | 13288  | 0.20 |
| <i>H. heptaphyllus</i> | NKXS01001471.1 | 19496  | 0.20 |
| <i>H. heptaphyllus</i> | NKXS01001471.1 | 19547  | 0.20 |
| <i>H. heptaphyllus</i> | NKXS01001471.1 | 19628  | 0.20 |
| <i>H. heptaphyllus</i> | NKXS01001471.1 | 19640  | 0.20 |
| <i>H. heptaphyllus</i> | NKXS01001471.1 | 19665  | 0.20 |
| <i>H. heptaphyllus</i> | NKXS01001471.1 | 19680  | 0.20 |
| <i>H. heptaphyllus</i> | NKXS01001476.1 | 4205   | 0.20 |
| <i>H. heptaphyllus</i> | NKXS01001491.1 | 2469   | 0.20 |
| <i>H. heptaphyllus</i> | NKXS01001495.1 | 18759  | 0.20 |
| <i>H. heptaphyllus</i> | NKXS01001505.1 | 84009  | 0.20 |
| <i>H. heptaphyllus</i> | NKXS01001505.1 | 84043  | 0.20 |
| <i>H. heptaphyllus</i> | NKXS01001512.1 | 108098 | 0.20 |
| <i>H. heptaphyllus</i> | NKXS01001530.1 | 36839  | 0.20 |
| <i>H. heptaphyllus</i> | NKXS01001530.1 | 36867  | 0.20 |
| <i>H. heptaphyllus</i> | NKXS01001530.1 | 36902  | 0.20 |
| <i>H. heptaphyllus</i> | NKXS01001530.1 | 36912  | 0.20 |
| <i>H. heptaphyllus</i> | NKXS01001530.1 | 36946  | 0.20 |
| <i>H. heptaphyllus</i> | NKXS01001533.1 | 19500  | 0.20 |



|                        |                |        |      |
|------------------------|----------------|--------|------|
| <i>H. heptaphyllus</i> | NKXS01001534.1 | 11164  | 0.20 |
| <i>H. heptaphyllus</i> | NKXS01001534.1 | 11253  | 0.20 |
| <i>H. heptaphyllus</i> | NKXS01001534.1 | 11303  | 0.20 |
| <i>H. heptaphyllus</i> | NKXS01001551.1 | 70144  | 0.20 |
| <i>H. heptaphyllus</i> | NKXS01001551.1 | 70237  | 0.20 |
| <i>H. heptaphyllus</i> | NKXS01001577.1 | 33926  | 0.20 |
| <i>H. heptaphyllus</i> | NKXS01001577.1 | 33967  | 0.20 |
| <i>H. heptaphyllus</i> | NKXS01001597.1 | 30658  | 0.20 |
| <i>H. heptaphyllus</i> | NKXS01001597.1 | 30908  | 0.20 |
| <i>H. heptaphyllus</i> | NKXS01001605.1 | 90296  | 0.20 |
| <i>H. heptaphyllus</i> | NKXS01001606.1 | 88252  | 0.20 |
| <i>H. heptaphyllus</i> | NKXS01001606.1 | 88267  | 0.20 |
| <i>H. heptaphyllus</i> | NKXS01001606.1 | 95223  | 0.20 |
| <i>H. heptaphyllus</i> | NKXS01001610.1 | 51422  | 0.20 |
| <i>H. heptaphyllus</i> | NKXS01001611.1 | 63420  | 0.20 |
| <i>H. heptaphyllus</i> | NKXS01001611.1 | 63468  | 0.20 |
| <i>H. heptaphyllus</i> | NKXS01001611.1 | 63639  | 0.20 |
| <i>H. heptaphyllus</i> | NKXS01001614.1 | 57758  | 0.20 |
| <i>H. heptaphyllus</i> | NKXS01001621.1 | 34675  | 0.20 |
| <i>H. heptaphyllus</i> | NKXS01001621.1 | 34701  | 0.20 |
| <i>H. heptaphyllus</i> | NKXS01001626.1 | 52335  | 0.20 |
| <i>H. heptaphyllus</i> | NKXS01001639.1 | 5227   | 0.20 |
| <i>H. heptaphyllus</i> | NKXS01001642.1 | 75968  | 0.20 |
| <i>H. heptaphyllus</i> | NKXS01001646.1 | 139906 | 0.20 |
| <i>H. heptaphyllus</i> | NKXS01001658.1 | 81312  | 0.20 |
| <i>H. heptaphyllus</i> | NKXS01001663.1 | 29505  | 0.20 |
| <i>H. heptaphyllus</i> | NKXS01001687.1 | 27661  | 0.20 |
| <i>H. heptaphyllus</i> | NKXS01001691.1 | 67360  | 0.20 |
| <i>H. heptaphyllus</i> | NKXS01001697.1 | 95267  | 0.20 |
| <i>H. heptaphyllus</i> | NKXS01001697.1 | 95291  | 0.20 |
| <i>H. heptaphyllus</i> | NKXS01001697.1 | 95444  | 0.20 |
| <i>H. heptaphyllus</i> | NKXS01001697.1 | 95481  | 0.20 |
| <i>H. heptaphyllus</i> | NKXS01001697.1 | 95484  | 0.20 |
| <i>H. heptaphyllus</i> | NKXS01001701.1 | 62335  | 0.20 |
| <i>H. heptaphyllus</i> | NKXS01001705.1 | 60784  | 0.20 |
| <i>H. heptaphyllus</i> | NKXS01001705.1 | 60787  | 0.20 |
| <i>H. heptaphyllus</i> | NKXS01001705.1 | 60812  | 0.20 |
| <i>H. heptaphyllus</i> | NKXS01001705.1 | 60858  | 0.20 |
| <i>H. heptaphyllus</i> | NKXS01001705.1 | 60865  | 0.20 |
| <i>H. heptaphyllus</i> | NKXS01001723.1 | 75986  | 0.20 |
| <i>H. heptaphyllus</i> | NKXS01001723.1 | 77216  | 0.20 |
| <i>H. heptaphyllus</i> | NKXS01001760.1 | 70852  | 0.20 |
| <i>H. heptaphyllus</i> | NKXS01001764.1 | 24079  | 0.20 |
| <i>H. heptaphyllus</i> | NKXS01001764.1 | 24144  | 0.20 |

|                        |                |        |      |
|------------------------|----------------|--------|------|
| <i>H. heptaphyllus</i> | NKXS01001764.1 | 24148  | 0.20 |
| <i>H. heptaphyllus</i> | NKXS01001764.1 | 24164  | 0.20 |
| <i>H. heptaphyllus</i> | NKXS01001764.1 | 24173  | 0.20 |
| <i>H. heptaphyllus</i> | NKXS01001764.1 | 24276  | 0.20 |
| <i>H. heptaphyllus</i> | NKXS01001764.1 | 24292  | 0.20 |
| <i>H. heptaphyllus</i> | NKXS01001764.1 | 24298  | 0.20 |
| <i>H. heptaphyllus</i> | NKXS01001765.1 | 14053  | 0.20 |
| <i>H. heptaphyllus</i> | NKXS01001772.1 | 106539 | 0.20 |
| <i>H. heptaphyllus</i> | NKXS01001773.1 | 48247  | 0.20 |
| <i>H. heptaphyllus</i> | NKXS01001778.1 | 64740  | 0.20 |
| <i>H. heptaphyllus</i> | NKXS01001778.1 | 64741  | 0.20 |
| <i>H. heptaphyllus</i> | NKXS01001778.1 | 64747  | 0.20 |
| <i>H. heptaphyllus</i> | NKXS01001793.1 | 9879   | 0.20 |
| <i>H. heptaphyllus</i> | NKXS01001794.1 | 113381 | 0.20 |
| <i>H. heptaphyllus</i> | NKXS01001794.1 | 113550 | 0.20 |
| <i>H. heptaphyllus</i> | NKXS01001803.1 | 96904  | 0.20 |
| <i>H. heptaphyllus</i> | NKXS01001812.1 | 35405  | 0.20 |
| <i>H. heptaphyllus</i> | NKXS01001828.1 | 62015  | 0.20 |
| <i>H. heptaphyllus</i> | NKXS01001828.1 | 62080  | 0.20 |
| <i>H. heptaphyllus</i> | NKXS01001828.1 | 62132  | 0.20 |
| <i>H. heptaphyllus</i> | NKXS01001845.1 | 98201  | 0.20 |
| <i>H. heptaphyllus</i> | NKXS01001856.1 | 81538  | 0.20 |
| <i>H. heptaphyllus</i> | NKXS01001858.1 | 13699  | 0.20 |
| <i>H. heptaphyllus</i> | NKXS01001859.1 | 71730  | 0.20 |
| <i>H. heptaphyllus</i> | NKXS01001868.1 | 39957  | 0.20 |
| <i>H. heptaphyllus</i> | NKXS01001873.1 | 643    | 0.20 |
| <i>H. heptaphyllus</i> | NKXS01001875.1 | 66502  | 0.20 |
| <i>H. heptaphyllus</i> | NKXS01001883.1 | 50758  | 0.20 |
| <i>H. heptaphyllus</i> | NKXS01001892.1 | 621    | 0.20 |
| <i>H. heptaphyllus</i> | NKXS01001892.1 | 660    | 0.20 |
| <i>H. heptaphyllus</i> | NKXS01001892.1 | 722    | 0.20 |
| <i>H. heptaphyllus</i> | NKXS01001892.1 | 739    | 0.20 |
| <i>H. heptaphyllus</i> | NKXS01001892.1 | 771    | 0.20 |
| <i>H. heptaphyllus</i> | NKXS01001892.1 | 809    | 0.20 |
| <i>H. heptaphyllus</i> | NKXS01001892.1 | 2357   | 0.20 |
| <i>H. heptaphyllus</i> | NKXS01001892.1 | 2440   | 0.20 |
| <i>H. heptaphyllus</i> | NKXS01001892.1 | 2472   | 0.20 |
| <i>H. heptaphyllus</i> | NKXS01001896.1 | 17029  | 0.20 |
| <i>H. heptaphyllus</i> | NKXS01001896.1 | 26132  | 0.20 |
| <i>H. heptaphyllus</i> | NKXS01001932.1 | 24113  | 0.20 |
| <i>H. heptaphyllus</i> | NKXS01001944.1 | 43693  | 0.20 |
| <i>H. heptaphyllus</i> | NKXS01001946.1 | 59584  | 0.20 |
| <i>H. heptaphyllus</i> | NKXS01001961.1 | 4347   | 0.20 |
| <i>H. heptaphyllus</i> | NKXS01001967.1 | 23573  | 0.20 |

|                        |                |        |      |
|------------------------|----------------|--------|------|
| <i>H. heptaphyllus</i> | NKXS01001968.1 | 64663  | 0.20 |
| <i>H. heptaphyllus</i> | NKXS01001972.1 | 59265  | 0.20 |
| <i>H. heptaphyllus</i> | NKXS01001972.1 | 77539  | 0.20 |
| <i>H. heptaphyllus</i> | NKXS01001972.1 | 77541  | 0.20 |
| <i>H. heptaphyllus</i> | NKXS01001972.1 | 100347 | 0.20 |
| <i>H. heptaphyllus</i> | NKXS01001972.1 | 100432 | 0.20 |
| <i>H. heptaphyllus</i> | NKXS01001972.1 | 100492 | 0.20 |
| <i>H. heptaphyllus</i> | NKXS01001972.1 | 100524 | 0.20 |
| <i>H. heptaphyllus</i> | NKXS01001979.1 | 9020   | 0.20 |
| <i>H. heptaphyllus</i> | NKXS01001984.1 | 80676  | 0.20 |
| <i>H. heptaphyllus</i> | NKXS01001985.1 | 79527  | 0.20 |
| <i>H. heptaphyllus</i> | NKXS01001991.1 | 5183   | 0.20 |
| <i>H. heptaphyllus</i> | NKXS01001991.1 | 5329   | 0.20 |
| <i>H. heptaphyllus</i> | NKXS01001991.1 | 34838  | 0.20 |
| <i>H. heptaphyllus</i> | NKXS01001991.1 | 36869  | 0.20 |
| <i>H. heptaphyllus</i> | NKXS01002006.1 | 36037  | 0.20 |
| <i>H. heptaphyllus</i> | NKXS01002006.1 | 43912  | 0.20 |
| <i>H. heptaphyllus</i> | NKXS01002006.1 | 44003  | 0.20 |
| <i>H. heptaphyllus</i> | NKXS01002006.1 | 44056  | 0.20 |
| <i>H. heptaphyllus</i> | NKXS01002009.1 | 10593  | 0.20 |
| <i>H. heptaphyllus</i> | NKXS01002014.1 | 20016  | 0.20 |
| <i>H. heptaphyllus</i> | NKXS01002016.1 | 111658 | 0.20 |
| <i>H. heptaphyllus</i> | NKXS01002019.1 | 10254  | 0.20 |
| <i>H. heptaphyllus</i> | NKXS01002052.1 | 51693  | 0.20 |
| <i>H. heptaphyllus</i> | NKXS01002052.1 | 57016  | 0.20 |
| <i>H. heptaphyllus</i> | NKXS01002052.1 | 57033  | 0.20 |
| <i>H. heptaphyllus</i> | NKXS01002052.1 | 57051  | 0.20 |
| <i>H. heptaphyllus</i> | NKXS01002057.1 | 76923  | 0.20 |
| <i>H. heptaphyllus</i> | NKXS01002061.1 | 74286  | 0.20 |
| <i>H. heptaphyllus</i> | NKXS01002068.1 | 35591  | 0.20 |
| <i>H. heptaphyllus</i> | NKXS01002070.1 | 47328  | 0.20 |
| <i>H. heptaphyllus</i> | NKXS01002071.1 | 83349  | 0.20 |
| <i>H. heptaphyllus</i> | NKXS01002071.1 | 83395  | 0.20 |
| <i>H. heptaphyllus</i> | NKXS01002071.1 | 83403  | 0.20 |
| <i>H. heptaphyllus</i> | NKXS01002071.1 | 83507  | 0.20 |
| <i>H. heptaphyllus</i> | NKXS01002082.1 | 29785  | 0.20 |
| <i>H. heptaphyllus</i> | NKXS01002087.1 | 89178  | 0.20 |
| <i>H. heptaphyllus</i> | NKXS01002103.1 | 4345   | 0.20 |
| <i>H. heptaphyllus</i> | NKXS01002103.1 | 4352   | 0.20 |
| <i>H. heptaphyllus</i> | NKXS01002103.1 | 4360   | 0.20 |
| <i>H. heptaphyllus</i> | NKXS01002103.1 | 4369   | 0.20 |
| <i>H. heptaphyllus</i> | NKXS01002103.1 | 4381   | 0.20 |
| <i>H. heptaphyllus</i> | NKXS01002103.1 | 4456   | 0.20 |
| <i>H. heptaphyllus</i> | NKXS01002103.1 | 4535   | 0.20 |

|                        |                |        |      |
|------------------------|----------------|--------|------|
| <i>H. heptaphyllus</i> | NKXS01002103.1 | 4546   | 0.20 |
| <i>H. heptaphyllus</i> | NKXS01002112.1 | 23078  | 0.20 |
| <i>H. heptaphyllus</i> | NKXS01002112.1 | 23091  | 0.20 |
| <i>H. heptaphyllus</i> | NKXS01002112.1 | 23162  | 0.20 |
| <i>H. heptaphyllus</i> | NKXS01002112.1 | 23252  | 0.20 |
| <i>H. heptaphyllus</i> | NKXS01002117.1 | 50993  | 0.20 |
| <i>H. heptaphyllus</i> | NKXS01002123.1 | 33569  | 0.20 |
| <i>H. heptaphyllus</i> | NKXS01002123.1 | 33590  | 0.20 |
| <i>H. heptaphyllus</i> | NKXS01002133.1 | 33278  | 0.20 |
| <i>H. heptaphyllus</i> | NKXS01002139.1 | 3033   | 0.20 |
| <i>H. heptaphyllus</i> | NKXS01002148.1 | 12268  | 0.20 |
| <i>H. heptaphyllus</i> | NKXS01002148.1 | 55331  | 0.20 |
| <i>H. heptaphyllus</i> | NKXS01002148.1 | 55332  | 0.20 |
| <i>H. heptaphyllus</i> | NKXS01002148.1 | 55333  | 0.20 |
| <i>H. heptaphyllus</i> | NKXS01002148.1 | 55429  | 0.20 |
| <i>H. heptaphyllus</i> | NKXS01002148.1 | 56926  | 0.20 |
| <i>H. heptaphyllus</i> | NKXS01002148.1 | 56932  | 0.20 |
| <i>H. heptaphyllus</i> | NKXS01002148.1 | 56950  | 0.20 |
| <i>H. heptaphyllus</i> | NKXS01002148.1 | 56970  | 0.20 |
| <i>H. heptaphyllus</i> | NKXS01002148.1 | 56986  | 0.20 |
| <i>H. heptaphyllus</i> | NKXS01002148.1 | 56995  | 0.20 |
| <i>H. heptaphyllus</i> | NKXS01002148.1 | 57006  | 0.20 |
| <i>H. heptaphyllus</i> | NKXS01002148.1 | 57023  | 0.20 |
| <i>H. heptaphyllus</i> | NKXS01002148.1 | 57035  | 0.20 |
| <i>H. heptaphyllus</i> | NKXS01002148.1 | 57046  | 0.20 |
| <i>H. heptaphyllus</i> | NKXS01002148.1 | 57064  | 0.20 |
| <i>H. heptaphyllus</i> | NKXS01002148.1 | 57112  | 0.20 |
| <i>H. heptaphyllus</i> | NKXS01002148.1 | 57160  | 0.20 |
| <i>H. heptaphyllus</i> | NKXS01002148.1 | 67664  | 0.20 |
| <i>H. heptaphyllus</i> | NKXS01002148.1 | 67794  | 0.20 |
| <i>H. heptaphyllus</i> | NKXS01002148.1 | 83512  | 0.20 |
| <i>H. heptaphyllus</i> | NKXS01002148.1 | 83658  | 0.20 |
| <i>H. heptaphyllus</i> | NKXS01002148.1 | 99162  | 0.20 |
| <i>H. heptaphyllus</i> | NKXS01002149.1 | 100707 | 0.20 |
| <i>H. heptaphyllus</i> | NKXS01002160.1 | 71742  | 0.20 |
| <i>H. heptaphyllus</i> | NKXS01002166.1 | 77230  | 0.20 |
| <i>H. heptaphyllus</i> | NKXS01002166.1 | 77239  | 0.20 |
| <i>H. heptaphyllus</i> | NKXS01002166.1 | 77250  | 0.20 |
| <i>H. heptaphyllus</i> | NKXS01002166.1 | 77256  | 0.20 |
| <i>H. heptaphyllus</i> | NKXS01002166.1 | 77273  | 0.20 |
| <i>H. heptaphyllus</i> | NKXS01002166.1 | 77426  | 0.20 |
| <i>H. heptaphyllus</i> | NKXS01002168.1 | 10213  | 0.20 |
| <i>H. heptaphyllus</i> | NKXS01002168.1 | 10216  | 0.20 |
| <i>H. heptaphyllus</i> | NKXS01002170.1 | 5310   | 0.20 |

|                        |                |        |      |
|------------------------|----------------|--------|------|
| <i>H. heptaphyllus</i> | NKXS01002178.1 | 5348   | 0.20 |
| <i>H. heptaphyllus</i> | NKXS01002190.1 | 44232  | 0.20 |
| <i>H. heptaphyllus</i> | NKXS01002196.1 | 36997  | 0.20 |
| <i>H. heptaphyllus</i> | NKXS01002210.1 | 492    | 0.20 |
| <i>H. heptaphyllus</i> | NKXS01002242.1 | 5914   | 0.20 |
| <i>H. heptaphyllus</i> | NKXS01002242.1 | 5969   | 0.20 |
| <i>H. heptaphyllus</i> | NKXS01002244.1 | 161930 | 0.20 |
| <i>H. heptaphyllus</i> | NKXS01002249.1 | 65459  | 0.20 |
| <i>H. heptaphyllus</i> | NKXS01002250.1 | 52880  | 0.20 |
| <i>H. heptaphyllus</i> | NKXS01002250.1 | 82033  | 0.20 |
| <i>H. heptaphyllus</i> | NKXS01002250.1 | 82068  | 0.20 |
| <i>H. heptaphyllus</i> | NKXS01002276.1 | 83814  | 0.20 |
| <i>H. heptaphyllus</i> | NKXS01002276.1 | 90306  | 0.20 |
| <i>H. heptaphyllus</i> | NKXS01002284.1 | 31799  | 0.20 |
| <i>H. heptaphyllus</i> | NKXS01002284.1 | 31865  | 0.20 |
| <i>H. heptaphyllus</i> | NKXS01002288.1 | 1900   | 0.20 |
| <i>H. heptaphyllus</i> | NKXS01002288.1 | 1914   | 0.20 |
| <i>H. heptaphyllus</i> | NKXS01002288.1 | 1928   | 0.20 |
| <i>H. heptaphyllus</i> | NKXS01002288.1 | 1958   | 0.20 |
| <i>H. heptaphyllus</i> | NKXS01002288.1 | 1983   | 0.20 |
| <i>H. heptaphyllus</i> | NKXS01002288.1 | 1991   | 0.20 |
| <i>H. heptaphyllus</i> | NKXS01002288.1 | 2010   | 0.20 |
| <i>H. heptaphyllus</i> | NKXS01002288.1 | 2020   | 0.20 |
| <i>H. heptaphyllus</i> | NKXS01002288.1 | 2122   | 0.20 |
| <i>H. heptaphyllus</i> | NKXS01002299.1 | 1289   | 0.20 |
| <i>H. heptaphyllus</i> | NKXS01002321.1 | 35482  | 0.20 |
| <i>H. heptaphyllus</i> | NKXS01002326.1 | 22162  | 0.20 |
| <i>H. heptaphyllus</i> | NKXS01002326.1 | 22197  | 0.20 |
| <i>H. heptaphyllus</i> | NKXS01002328.1 | 79077  | 0.20 |
| <i>H. heptaphyllus</i> | NKXS01002328.1 | 79082  | 0.20 |
| <i>H. heptaphyllus</i> | NKXS01002328.1 | 79089  | 0.20 |
| <i>H. heptaphyllus</i> | NKXS01002328.1 | 79102  | 0.20 |
| <i>H. heptaphyllus</i> | NKXS01002328.1 | 79104  | 0.20 |
| <i>H. heptaphyllus</i> | NKXS01002328.1 | 79111  | 0.20 |
| <i>H. heptaphyllus</i> | NKXS01002328.1 | 79124  | 0.20 |
| <i>H. heptaphyllus</i> | NKXS01002328.1 | 79126  | 0.20 |
| <i>H. heptaphyllus</i> | NKXS01002328.1 | 79131  | 0.20 |
| <i>H. heptaphyllus</i> | NKXS01002328.1 | 79170  | 0.20 |
| <i>H. heptaphyllus</i> | NKXS01002328.1 | 79189  | 0.20 |
| <i>H. heptaphyllus</i> | NKXS01002328.1 | 79204  | 0.20 |
| <i>H. heptaphyllus</i> | NKXS01002328.1 | 79206  | 0.20 |
| <i>H. heptaphyllus</i> | NKXS01002328.1 | 79220  | 0.20 |
| <i>H. heptaphyllus</i> | NKXS01002328.1 | 79232  | 0.20 |
| <i>H. heptaphyllus</i> | NKXS01002328.1 | 79250  | 0.20 |

|                        |                |       |      |
|------------------------|----------------|-------|------|
| <i>H. heptaphyllus</i> | NKXS01002328.1 | 79265 | 0.20 |
| <i>H. heptaphyllus</i> | NKXS01002328.1 | 79275 | 0.20 |
| <i>H. heptaphyllus</i> | NKXS01002328.1 | 79288 | 0.20 |
| <i>H. heptaphyllus</i> | NKXS01002328.1 | 79295 | 0.20 |
| <i>H. heptaphyllus</i> | NKXS01002328.1 | 79299 | 0.20 |
| <i>H. heptaphyllus</i> | NKXS01002328.1 | 79300 | 0.20 |
| <i>H. heptaphyllus</i> | NKXS01002328.1 | 79317 | 0.20 |
| <i>H. heptaphyllus</i> | NKXS01002328.1 | 79325 | 0.20 |
| <i>H. heptaphyllus</i> | NKXS01002328.1 | 79327 | 0.20 |
| <i>H. heptaphyllus</i> | NKXS01002330.1 | 12109 | 0.20 |
| <i>H. heptaphyllus</i> | NKXS01002337.1 | 77959 | 0.20 |
| <i>H. heptaphyllus</i> | NKXS01002337.1 | 77994 | 0.20 |
| <i>H. heptaphyllus</i> | NKXS01002360.1 | 27735 | 0.20 |
| <i>H. heptaphyllus</i> | NKXS01002366.1 | 98769 | 0.20 |
| <i>H. heptaphyllus</i> | NKXS01002366.1 | 98824 | 0.20 |
| <i>H. heptaphyllus</i> | NKXS01002366.1 | 99016 | 0.20 |
| <i>H. heptaphyllus</i> | NKXS01002367.1 | 69191 | 0.20 |
| <i>H. heptaphyllus</i> | NKXS01002387.1 | 11274 | 0.20 |
| <i>H. heptaphyllus</i> | NKXS01002387.1 | 11305 | 0.20 |
| <i>H. heptaphyllus</i> | NKXS01002387.1 | 11407 | 0.20 |
| <i>H. heptaphyllus</i> | NKXS01002391.1 | 6648  | 0.20 |
| <i>H. heptaphyllus</i> | NKXS01002391.1 | 6695  | 0.20 |
| <i>H. heptaphyllus</i> | NKXS01002394.1 | 46243 | 0.20 |
| <i>H. heptaphyllus</i> | NKXS01002396.1 | 10252 | 0.20 |
| <i>H. heptaphyllus</i> | NKXS01002396.1 | 10258 | 0.20 |
| <i>H. heptaphyllus</i> | NKXS01002396.1 | 10311 | 0.20 |
| <i>H. heptaphyllus</i> | NKXS01002396.1 | 10312 | 0.20 |
| <i>H. heptaphyllus</i> | NKXS01002396.1 | 10333 | 0.20 |
| <i>H. heptaphyllus</i> | NKXS01002396.1 | 10336 | 0.20 |
| <i>H. heptaphyllus</i> | NKXS01002396.1 | 10380 | 0.20 |
| <i>H. heptaphyllus</i> | NKXS01002396.1 | 10414 | 0.20 |
| <i>H. heptaphyllus</i> | NKXS01002396.1 | 10417 | 0.20 |
| <i>H. heptaphyllus</i> | NKXS01002396.1 | 10420 | 0.20 |
| <i>H. heptaphyllus</i> | NKXS01002421.1 | 33082 | 0.20 |
| <i>H. heptaphyllus</i> | NKXS01002421.1 | 33671 | 0.20 |
| <i>H. heptaphyllus</i> | NKXS01002421.1 | 39719 | 0.20 |
| <i>H. heptaphyllus</i> | NKXS01002421.1 | 41001 | 0.20 |
| <i>H. heptaphyllus</i> | NKXS01002421.1 | 61225 | 0.20 |
| <i>H. heptaphyllus</i> | NKXS01002441.1 | 50203 | 0.20 |
| <i>H. heptaphyllus</i> | NKXS01002441.1 | 50207 | 0.20 |
| <i>H. heptaphyllus</i> | NKXS01002441.1 | 50304 | 0.20 |
| <i>H. heptaphyllus</i> | NKXS01002445.1 | 40657 | 0.20 |
| <i>H. heptaphyllus</i> | NKXS01002450.1 | 48204 | 0.20 |
| <i>H. heptaphyllus</i> | NKXS01002450.1 | 48282 | 0.20 |

|                        |                |        |      |
|------------------------|----------------|--------|------|
| <i>H. heptaphyllus</i> | NKXS01002450.1 | 48288  | 0.20 |
| <i>H. heptaphyllus</i> | NKXS01002466.1 | 46528  | 0.20 |
| <i>H. heptaphyllus</i> | NKXS01002466.1 | 46563  | 0.20 |
| <i>H. heptaphyllus</i> | NKXS01002470.1 | 34945  | 0.20 |
| <i>H. heptaphyllus</i> | NKXS01002470.1 | 34953  | 0.20 |
| <i>H. heptaphyllus</i> | NKXS01002512.1 | 57980  | 0.20 |
| <i>H. heptaphyllus</i> | NKXS01002519.1 | 7363   | 0.20 |
| <i>H. heptaphyllus</i> | NKXS01002530.1 | 62254  | 0.20 |
| <i>H. heptaphyllus</i> | NKXS01002543.1 | 37384  | 0.20 |
| <i>H. heptaphyllus</i> | NKXS01002543.1 | 37548  | 0.20 |
| <i>H. heptaphyllus</i> | NKXS01002543.1 | 37553  | 0.20 |
| <i>H. heptaphyllus</i> | NKXS01002561.1 | 2373   | 0.20 |
| <i>H. heptaphyllus</i> | NKXS01002562.1 | 89713  | 0.20 |
| <i>H. heptaphyllus</i> | NKXS01002562.1 | 89837  | 0.20 |
| <i>H. heptaphyllus</i> | NKXS01002570.1 | 59116  | 0.20 |
| <i>H. heptaphyllus</i> | NKXS01002570.1 | 59172  | 0.20 |
| <i>H. heptaphyllus</i> | NKXS01002574.1 | 9628   | 0.20 |
| <i>H. heptaphyllus</i> | NKXS01002574.1 | 9780   | 0.20 |
| <i>H. heptaphyllus</i> | NKXS01002575.1 | 6267   | 0.20 |
| <i>H. heptaphyllus</i> | NKXS01002576.1 | 12254  | 0.20 |
| <i>H. heptaphyllus</i> | NKXS01002577.1 | 413    | 0.20 |
| <i>H. heptaphyllus</i> | NKXS01002593.1 | 84600  | 0.20 |
| <i>H. heptaphyllus</i> | NKXS01002616.1 | 41843  | 0.20 |
| <i>H. heptaphyllus</i> | NKXS01002616.1 | 41924  | 0.20 |
| <i>H. heptaphyllus</i> | NKXS01002616.1 | 42020  | 0.20 |
| <i>H. heptaphyllus</i> | NKXS01002633.1 | 83104  | 0.20 |
| <i>H. heptaphyllus</i> | NKXS01002637.1 | 35311  | 0.20 |
| <i>H. heptaphyllus</i> | NKXS01002637.1 | 54398  | 0.20 |
| <i>H. heptaphyllus</i> | NKXS01002655.1 | 9467   | 0.20 |
| <i>H. heptaphyllus</i> | NKXS01002661.1 | 45969  | 0.20 |
| <i>H. heptaphyllus</i> | NKXS01002661.1 | 65650  | 0.20 |
| <i>H. heptaphyllus</i> | NKXS01002661.1 | 65765  | 0.20 |
| <i>H. heptaphyllus</i> | NKXS01002663.1 | 6693   | 0.20 |
| <i>H. heptaphyllus</i> | NKXS01002675.1 | 67237  | 0.20 |
| <i>H. heptaphyllus</i> | NKXS01002684.1 | 2913   | 0.20 |
| <i>H. heptaphyllus</i> | NKXS01002685.1 | 80042  | 0.20 |
| <i>H. heptaphyllus</i> | NKXS01002686.1 | 51201  | 0.20 |
| <i>H. heptaphyllus</i> | NKXS01002686.1 | 51289  | 0.20 |
| <i>H. heptaphyllus</i> | NKXS01002694.1 | 24546  | 0.20 |
| <i>H. heptaphyllus</i> | NKXS01002704.1 | 61802  | 0.20 |
| <i>H. heptaphyllus</i> | NKXS01002704.1 | 61912  | 0.20 |
| <i>H. heptaphyllus</i> | NKXS01002704.1 | 61967  | 0.20 |
| <i>H. heptaphyllus</i> | NKXS01002705.1 | 159650 | 0.20 |
| <i>H. heptaphyllus</i> | NKXS01002705.1 | 210400 | 0.20 |

|                        |                |        |      |
|------------------------|----------------|--------|------|
| <i>H. heptaphyllus</i> | NKXS01002705.1 | 210421 | 0.20 |
| <i>H. heptaphyllus</i> | NKXS01002705.1 | 210478 | 0.20 |
| <i>H. heptaphyllus</i> | NKXS01002705.1 | 210479 | 0.20 |
| <i>H. heptaphyllus</i> | NKXS01002705.1 | 210583 | 0.20 |
| <i>H. heptaphyllus</i> | NKXS01002705.1 | 210588 | 0.20 |
| <i>H. heptaphyllus</i> | NKXS01002705.1 | 210609 | 0.20 |
| <i>H. heptaphyllus</i> | NKXS01002706.1 | 67720  | 0.20 |
| <i>H. heptaphyllus</i> | NKXS01002717.1 | 2752   | 0.20 |
| <i>H. heptaphyllus</i> | NKXS01002717.1 | 2874   | 0.20 |
| <i>H. heptaphyllus</i> | NKXS01002718.1 | 2596   | 0.20 |
| <i>H. heptaphyllus</i> | NKXS01002718.1 | 2654   | 0.20 |
| <i>H. heptaphyllus</i> | NKXS01002730.1 | 26371  | 0.20 |
| <i>H. heptaphyllus</i> | NKXS01002730.1 | 26403  | 0.20 |
| <i>H. heptaphyllus</i> | NKXS01002730.1 | 26419  | 0.20 |
| <i>H. heptaphyllus</i> | NKXS01002730.1 | 50303  | 0.20 |
| <i>H. heptaphyllus</i> | NKXS01002742.1 | 543    | 0.20 |
| <i>H. heptaphyllus</i> | NKXS01002744.1 | 77850  | 0.20 |
| <i>H. heptaphyllus</i> | NKXS01002747.1 | 21990  | 0.20 |
| <i>H. heptaphyllus</i> | NKXS01002747.1 | 22050  | 0.20 |
| <i>H. heptaphyllus</i> | NKXS01002749.1 | 28651  | 0.20 |
| <i>H. heptaphyllus</i> | NKXS01002750.1 | 34438  | 0.20 |
| <i>H. heptaphyllus</i> | NKXS01002758.1 | 40762  | 0.20 |
| <i>H. heptaphyllus</i> | NKXS01002761.1 | 27829  | 0.20 |
| <i>H. heptaphyllus</i> | NKXS01002762.1 | 538    | 0.20 |
| <i>H. heptaphyllus</i> | NKXS01002762.1 | 629    | 0.20 |
| <i>H. heptaphyllus</i> | NKXS01002762.1 | 650    | 0.20 |
| <i>H. heptaphyllus</i> | NKXS01002769.1 | 2005   | 0.20 |
| <i>H. heptaphyllus</i> | NKXS01002785.1 | 72769  | 0.20 |
| <i>H. heptaphyllus</i> | NKXS01002817.1 | 27548  | 0.20 |
| <i>H. heptaphyllus</i> | NKXS01002817.1 | 27618  | 0.20 |
| <i>H. heptaphyllus</i> | NKXS01002817.1 | 36138  | 0.20 |
| <i>H. heptaphyllus</i> | NKXS01002822.1 | 10383  | 0.20 |
| <i>H. heptaphyllus</i> | NKXS01002825.1 | 233779 | 0.20 |
| <i>H. heptaphyllus</i> | NKXS01002828.1 | 93130  | 0.20 |
| <i>H. heptaphyllus</i> | NKXS01002828.1 | 93140  | 0.20 |
| <i>H. heptaphyllus</i> | NKXS01002828.1 | 93144  | 0.20 |
| <i>H. heptaphyllus</i> | NKXS01002828.1 | 93149  | 0.20 |
| <i>H. heptaphyllus</i> | NKXS01002828.1 | 93162  | 0.20 |
| <i>H. heptaphyllus</i> | NKXS01002828.1 | 93219  | 0.20 |
| <i>H. heptaphyllus</i> | NKXS01002828.1 | 119525 | 0.20 |
| <i>H. heptaphyllus</i> | NKXS01002830.1 | 62846  | 0.20 |
| <i>H. heptaphyllus</i> | NKXS01002830.1 | 62855  | 0.20 |
| <i>H. heptaphyllus</i> | NKXS01002830.1 | 62888  | 0.20 |
| <i>H. heptaphyllus</i> | NKXS01002830.1 | 62908  | 0.20 |



|                        |                |        |      |
|------------------------|----------------|--------|------|
| <i>H. heptaphyllus</i> | NKXS01002830.1 | 62945  | 0.20 |
| <i>H. heptaphyllus</i> | NKXS01002830.1 | 62978  | 0.20 |
| <i>H. heptaphyllus</i> | NKXS01002830.1 | 63027  | 0.20 |
| <i>H. heptaphyllus</i> | NKXS01002830.1 | 63029  | 0.20 |
| <i>H. heptaphyllus</i> | NKXS01002830.1 | 63084  | 0.20 |
| <i>H. heptaphyllus</i> | NKXS01002830.1 | 63092  | 0.20 |
| <i>H. heptaphyllus</i> | NKXS01002854.1 | 36448  | 0.20 |
| <i>H. heptaphyllus</i> | NKXS01002854.1 | 36514  | 0.20 |
| <i>H. heptaphyllus</i> | NKXS01002854.1 | 36516  | 0.20 |
| <i>H. heptaphyllus</i> | NKXS01002854.1 | 36569  | 0.20 |
| <i>H. heptaphyllus</i> | NKXS01002873.1 | 83724  | 0.20 |
| <i>H. heptaphyllus</i> | NKXS01002873.1 | 83892  | 0.20 |
| <i>H. heptaphyllus</i> | NKXS01002873.1 | 106738 | 0.20 |
| <i>H. heptaphyllus</i> | NKXS01002873.1 | 106759 | 0.20 |
| <i>H. heptaphyllus</i> | NKXS01002876.1 | 36012  | 0.20 |
| <i>H. heptaphyllus</i> | NKXS01002920.1 | 24377  | 0.20 |
| <i>H. heptaphyllus</i> | NKXS01002946.1 | 16838  | 0.20 |
| <i>H. heptaphyllus</i> | NKXS01002946.1 | 16857  | 0.20 |
| <i>H. heptaphyllus</i> | NKXS01002946.1 | 16894  | 0.20 |
| <i>H. heptaphyllus</i> | NKXS01002947.1 | 51562  | 0.20 |
| <i>H. heptaphyllus</i> | NKXS01002947.1 | 51599  | 0.20 |
| <i>H. heptaphyllus</i> | NKXS01002958.1 | 70127  | 0.20 |
| <i>H. heptaphyllus</i> | NKXS01002958.1 | 70277  | 0.20 |
| <i>H. heptaphyllus</i> | NKXS01002982.1 | 7943   | 0.20 |
| <i>H. heptaphyllus</i> | NKXS01002982.1 | 8055   | 0.20 |
| <i>H. heptaphyllus</i> | NKXS01002982.1 | 8081   | 0.20 |
| <i>H. heptaphyllus</i> | NKXS01002982.1 | 8118   | 0.20 |
| <i>H. heptaphyllus</i> | NKXS01002995.1 | 23768  | 0.20 |
| <i>H. heptaphyllus</i> | NKXS01002999.1 | 83226  | 0.20 |
| <i>H. heptaphyllus</i> | NKXS01002999.1 | 83239  | 0.20 |
| <i>H. heptaphyllus</i> | NKXS01003001.1 | 67323  | 0.20 |
| <i>H. heptaphyllus</i> | NKXS01003004.1 | 57682  | 0.20 |
| <i>H. heptaphyllus</i> | NKXS01003004.1 | 57724  | 0.20 |
| <i>H. heptaphyllus</i> | NKXS01003010.1 | 9377   | 0.20 |
| <i>H. heptaphyllus</i> | NKXS01003010.1 | 9443   | 0.20 |
| <i>H. heptaphyllus</i> | NKXS01003013.1 | 48995  | 0.20 |
| <i>H. heptaphyllus</i> | NKXS01003013.1 | 106054 | 0.20 |
| <i>H. heptaphyllus</i> | NKXS01003014.1 | 38568  | 0.20 |
| <i>H. heptaphyllus</i> | NKXS01003014.1 | 38584  | 0.20 |
| <i>H. heptaphyllus</i> | NKXS01003014.1 | 38585  | 0.20 |
| <i>H. heptaphyllus</i> | NKXS01003014.1 | 38636  | 0.20 |
| <i>H. heptaphyllus</i> | NKXS01003014.1 | 38647  | 0.20 |
| <i>H. heptaphyllus</i> | NKXS01003014.1 | 38656  | 0.20 |
| <i>H. heptaphyllus</i> | NKXS01003014.1 | 38668  | 0.20 |

|                        |                |        |      |
|------------------------|----------------|--------|------|
| <i>H. heptaphyllus</i> | NKXS01003014.1 | 38669  | 0.20 |
| <i>H. heptaphyllus</i> | NKXS01003014.1 | 38688  | 0.20 |
| <i>H. heptaphyllus</i> | NKXS01003014.1 | 38737  | 0.20 |
| <i>H. heptaphyllus</i> | NKXS01003038.1 | 40751  | 0.20 |
| <i>H. heptaphyllus</i> | NKXS01003038.1 | 40977  | 0.20 |
| <i>H. heptaphyllus</i> | NKXS01003048.1 | 91416  | 0.20 |
| <i>H. heptaphyllus</i> | NKXS01003096.1 | 14219  | 0.20 |
| <i>H. heptaphyllus</i> | NKXS01003105.1 | 56314  | 0.20 |
| <i>H. heptaphyllus</i> | NKXS01003111.1 | 2466   | 0.20 |
| <i>H. heptaphyllus</i> | NKXS01003111.1 | 2488   | 0.20 |
| <i>H. heptaphyllus</i> | NKXS01003114.1 | 115579 | 0.20 |
| <i>H. heptaphyllus</i> | NKXS01003114.1 | 115664 | 0.20 |
| <i>H. heptaphyllus</i> | NKXS01003114.1 | 122219 | 0.20 |
| <i>H. heptaphyllus</i> | NKXS01003114.1 | 122235 | 0.20 |
| <i>H. heptaphyllus</i> | NKXS01003114.1 | 122300 | 0.20 |
| <i>H. heptaphyllus</i> | NKXS01003115.1 | 72467  | 0.20 |
| <i>H. heptaphyllus</i> | NKXS01003115.1 | 72497  | 0.20 |
| <i>H. heptaphyllus</i> | NKXS01003125.1 | 20380  | 0.20 |
| <i>H. heptaphyllus</i> | NKXS01003125.1 | 20557  | 0.20 |
| <i>H. heptaphyllus</i> | NKXS01003125.1 | 20593  | 0.20 |
| <i>H. heptaphyllus</i> | NKXS01003134.1 | 67078  | 0.20 |
| <i>H. heptaphyllus</i> | NKXS01003134.1 | 67151  | 0.20 |
| <i>H. heptaphyllus</i> | NKXS01003134.1 | 70937  | 0.20 |
| <i>H. heptaphyllus</i> | NKXS01003134.1 | 71055  | 0.20 |
| <i>H. heptaphyllus</i> | NKXS01003153.1 | 101737 | 0.20 |
| <i>H. heptaphyllus</i> | NKXS01003153.1 | 106473 | 0.20 |
| <i>H. heptaphyllus</i> | NKXS01003154.1 | 30202  | 0.20 |
| <i>H. heptaphyllus</i> | NKXS01003154.1 | 55696  | 0.20 |
| <i>H. heptaphyllus</i> | NKXS01003169.1 | 5673   | 0.20 |
| <i>H. heptaphyllus</i> | NKXS01003169.1 | 5715   | 0.20 |
| <i>H. heptaphyllus</i> | NKXS01003194.1 | 78203  | 0.20 |
| <i>H. heptaphyllus</i> | NKXS01003194.1 | 78306  | 0.20 |
| <i>H. heptaphyllus</i> | NKXS01003194.1 | 78724  | 0.20 |
| <i>H. heptaphyllus</i> | NKXS01003194.1 | 78822  | 0.20 |
| <i>H. heptaphyllus</i> | NKXS01003194.1 | 78864  | 0.20 |
| <i>H. heptaphyllus</i> | NKXS01003194.1 | 78881  | 0.20 |
| <i>H. heptaphyllus</i> | NKXS01003194.1 | 78890  | 0.20 |
| <i>H. heptaphyllus</i> | NKXS01003194.1 | 78954  | 0.20 |
| <i>H. heptaphyllus</i> | NKXS01003200.1 | 8496   | 0.20 |
| <i>H. heptaphyllus</i> | NKXS01003200.1 | 8503   | 0.20 |
| <i>H. heptaphyllus</i> | NKXS01003200.1 | 8537   | 0.20 |
| <i>H. heptaphyllus</i> | NKXS01003212.1 | 52151  | 0.20 |
| <i>H. heptaphyllus</i> | NKXS01003233.1 | 9383   | 0.20 |
| <i>H. heptaphyllus</i> | NKXS01003233.1 | 9584   | 0.20 |

|                        |                |       |      |
|------------------------|----------------|-------|------|
| <i>H. heptaphyllus</i> | NKXS01003233.1 | 28583 | 0.20 |
| <i>H. heptaphyllus</i> | NKXS01003233.1 | 28726 | 0.20 |
| <i>H. heptaphyllus</i> | NKXS01003242.1 | 22605 | 0.20 |
| <i>H. heptaphyllus</i> | NKXS01003246.1 | 24439 | 0.20 |
| <i>H. heptaphyllus</i> | NKXS01003269.1 | 20447 | 0.20 |
| <i>H. heptaphyllus</i> | NKXS01003280.1 | 62220 | 0.20 |
| <i>H. heptaphyllus</i> | NKXS01003281.1 | 76603 | 0.20 |
| <i>H. heptaphyllus</i> | NKXS01003295.1 | 47846 | 0.20 |
| <i>H. heptaphyllus</i> | NKXS01003315.1 | 70293 | 0.20 |
| <i>H. heptaphyllus</i> | NKXS01003320.1 | 18150 | 0.20 |
| <i>H. heptaphyllus</i> | NKXS01003320.1 | 18158 | 0.20 |
| <i>H. heptaphyllus</i> | NKXS01003322.1 | 20134 | 0.20 |
| <i>H. heptaphyllus</i> | NKXS01003322.1 | 20216 | 0.20 |
| <i>H. heptaphyllus</i> | NKXS01003324.1 | 25770 | 0.20 |
| <i>H. heptaphyllus</i> | NKXS01003342.1 | 3652  | 0.20 |
| <i>H. heptaphyllus</i> | NKXS01003344.1 | 13115 | 0.20 |
| <i>H. heptaphyllus</i> | NKXS01003344.1 | 13120 | 0.20 |
| <i>H. heptaphyllus</i> | NKXS01003344.1 | 13168 | 0.20 |
| <i>H. heptaphyllus</i> | NKXS01003344.1 | 13353 | 0.20 |
| <i>H. heptaphyllus</i> | NKXS01003344.1 | 24458 | 0.20 |
| <i>H. heptaphyllus</i> | NKXS01003344.1 | 24482 | 0.20 |
| <i>H. heptaphyllus</i> | NKXS01003382.1 | 14903 | 0.20 |
| <i>H. heptaphyllus</i> | NKXS01003382.1 | 15015 | 0.20 |
| <i>H. heptaphyllus</i> | NKXS01003382.1 | 15036 | 0.20 |
| <i>H. heptaphyllus</i> | NKXS01003382.1 | 15095 | 0.20 |
| <i>H. heptaphyllus</i> | NKXS01003382.1 | 15120 | 0.20 |
| <i>H. heptaphyllus</i> | NKXS01003382.1 | 15147 | 0.20 |
| <i>H. heptaphyllus</i> | NKXS01003382.1 | 15154 | 0.20 |
| <i>H. heptaphyllus</i> | NKXS01003391.1 | 41713 | 0.20 |
| <i>H. heptaphyllus</i> | NKXS01003391.1 | 42592 | 0.20 |
| <i>H. heptaphyllus</i> | NKXS01003395.1 | 8965  | 0.20 |
| <i>H. heptaphyllus</i> | NKXS01003395.1 | 8991  | 0.20 |
| <i>H. heptaphyllus</i> | NKXS01003399.1 | 63107 | 0.20 |
| <i>H. heptaphyllus</i> | NKXS01003399.1 | 63138 | 0.20 |
| <i>H. heptaphyllus</i> | NKXS01003399.1 | 63143 | 0.20 |
| <i>H. heptaphyllus</i> | NKXS01003404.1 | 48020 | 0.20 |
| <i>H. heptaphyllus</i> | NKXS01003412.1 | 30814 | 0.20 |
| <i>H. heptaphyllus</i> | NKXS01003412.1 | 30821 | 0.20 |
| <i>H. heptaphyllus</i> | NKXS01003412.1 | 30899 | 0.20 |
| <i>H. heptaphyllus</i> | NKXS01003412.1 | 30986 | 0.20 |
| <i>H. heptaphyllus</i> | NKXS01003413.1 | 990   | 0.20 |
| <i>H. heptaphyllus</i> | NKXS01003413.1 | 1062  | 0.20 |
| <i>H. heptaphyllus</i> | NKXS01003413.1 | 1073  | 0.20 |
| <i>H. heptaphyllus</i> | NKXS01003413.1 | 1094  | 0.20 |

|                        |                |       |      |
|------------------------|----------------|-------|------|
| <i>H. heptaphyllus</i> | NKXS01003423.1 | 5584  | 0.20 |
| <i>H. heptaphyllus</i> | NKXS01003424.1 | 34595 | 0.20 |
| <i>H. heptaphyllus</i> | NKXS01003424.1 | 34764 | 0.20 |
| <i>H. heptaphyllus</i> | NKXS01003459.1 | 41071 | 0.20 |
| <i>H. heptaphyllus</i> | NKXS01003459.1 | 41081 | 0.20 |
| <i>H. heptaphyllus</i> | NKXS01003474.1 | 55857 | 0.20 |
| <i>H. heptaphyllus</i> | NKXS01003490.1 | 12645 | 0.20 |
| <i>H. heptaphyllus</i> | NKXS01003490.1 | 12687 | 0.20 |
| <i>H. heptaphyllus</i> | NKXS01003490.1 | 12803 | 0.20 |
| <i>H. heptaphyllus</i> | NKXS01003502.1 | 33422 | 0.20 |
| <i>H. heptaphyllus</i> | NKXS01003502.1 | 33464 | 0.20 |
| <i>H. heptaphyllus</i> | NKXS01003502.1 | 33474 | 0.20 |
| <i>H. heptaphyllus</i> | NKXS01003511.1 | 7937  | 0.20 |
| <i>H. heptaphyllus</i> | NKXS01003511.1 | 7943  | 0.20 |
| <i>H. heptaphyllus</i> | NKXS01003521.1 | 14624 | 0.20 |
| <i>H. heptaphyllus</i> | NKXS01003521.1 | 14635 | 0.20 |
| <i>H. heptaphyllus</i> | NKXS01003521.1 | 14638 | 0.20 |
| <i>H. heptaphyllus</i> | NKXS01003521.1 | 14678 | 0.20 |
| <i>H. heptaphyllus</i> | NKXS01003521.1 | 14689 | 0.20 |
| <i>H. heptaphyllus</i> | NKXS01003521.1 | 14703 | 0.20 |
| <i>H. heptaphyllus</i> | NKXS01003521.1 | 14711 | 0.20 |
| <i>H. heptaphyllus</i> | NKXS01003528.1 | 5200  | 0.20 |
| <i>H. heptaphyllus</i> | NKXS01003528.1 | 5202  | 0.20 |
| <i>H. heptaphyllus</i> | NKXS01003547.1 | 27265 | 0.20 |
| <i>H. heptaphyllus</i> | NKXS01003564.1 | 3537  | 0.20 |
| <i>H. heptaphyllus</i> | NKXS01003576.1 | 35486 | 0.20 |
| <i>H. heptaphyllus</i> | NKXS01003599.1 | 2669  | 0.20 |
| <i>H. heptaphyllus</i> | NKXS01003599.1 | 42920 | 0.20 |
| <i>H. heptaphyllus</i> | NKXS01003604.1 | 33589 | 0.20 |
| <i>H. heptaphyllus</i> | NKXS01003608.1 | 45218 | 0.20 |
| <i>H. heptaphyllus</i> | NKXS01003612.1 | 26745 | 0.20 |
| <i>H. heptaphyllus</i> | NKXS01003612.1 | 26760 | 0.20 |
| <i>H. heptaphyllus</i> | NKXS01003612.1 | 26791 | 0.20 |
| <i>H. heptaphyllus</i> | NKXS01003612.1 | 26837 | 0.20 |
| <i>H. heptaphyllus</i> | NKXS01003612.1 | 26916 | 0.20 |
| <i>H. heptaphyllus</i> | NKXS01003612.1 | 26951 | 0.20 |
| <i>H. heptaphyllus</i> | NKXS01003623.1 | 75945 | 0.20 |
| <i>H. heptaphyllus</i> | NKXS01003626.1 | 16207 | 0.20 |
| <i>H. heptaphyllus</i> | NKXS01003633.1 | 18506 | 0.20 |
| <i>H. heptaphyllus</i> | NKXS01003639.1 | 27009 | 0.20 |
| <i>H. heptaphyllus</i> | NKXS01003639.1 | 27024 | 0.20 |
| <i>H. heptaphyllus</i> | NKXS01003639.1 | 27080 | 0.20 |
| <i>H. heptaphyllus</i> | NKXS01003646.1 | 73444 | 0.20 |
| <i>H. heptaphyllus</i> | NKXS01003657.1 | 73790 | 0.20 |

|                        |                |        |      |
|------------------------|----------------|--------|------|
| <i>H. heptaphyllus</i> | NKXS01003657.1 | 74442  | 0.20 |
| <i>H. heptaphyllus</i> | NKXS01003667.1 | 38604  | 0.20 |
| <i>H. heptaphyllus</i> | NKXS01003678.1 | 34984  | 0.20 |
| <i>H. heptaphyllus</i> | NKXS01003686.1 | 10021  | 0.20 |
| <i>H. heptaphyllus</i> | NKXS01003713.1 | 576    | 0.20 |
| <i>H. heptaphyllus</i> | NKXS01003713.1 | 640    | 0.20 |
| <i>H. heptaphyllus</i> | NKXS01003713.1 | 658    | 0.20 |
| <i>H. heptaphyllus</i> | NKXS01003713.1 | 661    | 0.20 |
| <i>H. heptaphyllus</i> | NKXS01003713.1 | 665    | 0.20 |
| <i>H. heptaphyllus</i> | NKXS01003713.1 | 734    | 0.20 |
| <i>H. heptaphyllus</i> | NKXS01003713.1 | 739    | 0.20 |
| <i>H. heptaphyllus</i> | NKXS01003713.1 | 39611  | 0.20 |
| <i>H. heptaphyllus</i> | NKXS01003719.1 | 67495  | 0.20 |
| <i>H. heptaphyllus</i> | NKXS01003719.1 | 67579  | 0.20 |
| <i>H. heptaphyllus</i> | NKXS01003719.1 | 67707  | 0.20 |
| <i>H. heptaphyllus</i> | NKXS01003719.1 | 73516  | 0.20 |
| <i>H. heptaphyllus</i> | NKXS01003719.1 | 73567  | 0.20 |
| <i>H. heptaphyllus</i> | NKXS01003744.1 | 41646  | 0.20 |
| <i>H. heptaphyllus</i> | NKXS01003747.1 | 39963  | 0.20 |
| <i>H. heptaphyllus</i> | NKXS01003762.1 | 49956  | 0.20 |
| <i>H. heptaphyllus</i> | NKXS01003762.1 | 50150  | 0.20 |
| <i>H. heptaphyllus</i> | NKXS01003766.1 | 9045   | 0.20 |
| <i>H. heptaphyllus</i> | NKXS01003775.1 | 20409  | 0.20 |
| <i>H. heptaphyllus</i> | NKXS01003775.1 | 20478  | 0.20 |
| <i>H. heptaphyllus</i> | NKXS01003775.1 | 20484  | 0.20 |
| <i>H. heptaphyllus</i> | NKXS01003775.1 | 20509  | 0.20 |
| <i>H. heptaphyllus</i> | NKXS01003815.1 | 49256  | 0.20 |
| <i>H. heptaphyllus</i> | NKXS01003817.1 | 16619  | 0.20 |
| <i>H. heptaphyllus</i> | NKXS01003821.1 | 101950 | 0.20 |
| <i>H. heptaphyllus</i> | NKXS01003829.1 | 32940  | 0.20 |
| <i>H. heptaphyllus</i> | NKXS01003829.1 | 33081  | 0.20 |
| <i>H. heptaphyllus</i> | NKXS01003849.1 | 35911  | 0.20 |
| <i>H. heptaphyllus</i> | NKXS01003849.1 | 35987  | 0.20 |
| <i>H. heptaphyllus</i> | NKXS01003852.1 | 29342  | 0.20 |
| <i>H. heptaphyllus</i> | NKXS01003868.1 | 106860 | 0.20 |
| <i>H. heptaphyllus</i> | NKXS01003868.1 | 106861 | 0.20 |
| <i>H. heptaphyllus</i> | NKXS01003868.1 | 112630 | 0.20 |
| <i>H. heptaphyllus</i> | NKXS01003868.1 | 118549 | 0.20 |
| <i>H. heptaphyllus</i> | NKXS01003868.1 | 118606 | 0.20 |
| <i>H. heptaphyllus</i> | NKXS01003868.1 | 118616 | 0.20 |
| <i>H. heptaphyllus</i> | NKXS01003868.1 | 118631 | 0.20 |
| <i>H. heptaphyllus</i> | NKXS01003874.1 | 1855   | 0.20 |
| <i>H. heptaphyllus</i> | NKXS01003896.1 | 48559  | 0.20 |
| <i>H. heptaphyllus</i> | NKXS01003896.1 | 48562  | 0.20 |

|                        |                |        |      |
|------------------------|----------------|--------|------|
| <i>H. heptaphyllus</i> | NKXS01003896.1 | 48583  | 0.20 |
| <i>H. heptaphyllus</i> | NKXS01003899.1 | 57345  | 0.20 |
| <i>H. heptaphyllus</i> | NKXS01003902.1 | 64940  | 0.20 |
| <i>H. heptaphyllus</i> | NKXS01003919.1 | 44288  | 0.20 |
| <i>H. heptaphyllus</i> | NKXS01003919.1 | 44378  | 0.20 |
| <i>H. heptaphyllus</i> | NKXS01003919.1 | 44431  | 0.20 |
| <i>H. heptaphyllus</i> | NKXS01003919.1 | 44446  | 0.20 |
| <i>H. heptaphyllus</i> | NKXS01003932.1 | 38640  | 0.20 |
| <i>H. heptaphyllus</i> | NKXS01003942.1 | 89616  | 0.20 |
| <i>H. heptaphyllus</i> | NKXS01003946.1 | 46542  | 0.20 |
| <i>H. heptaphyllus</i> | NKXS01003947.1 | 41876  | 0.20 |
| <i>H. heptaphyllus</i> | NKXS01003955.1 | 38629  | 0.20 |
| <i>H. heptaphyllus</i> | NKXS01003955.1 | 38666  | 0.20 |
| <i>H. heptaphyllus</i> | NKXS01003955.1 | 38691  | 0.20 |
| <i>H. heptaphyllus</i> | NKXS01003955.1 | 38712  | 0.20 |
| <i>H. heptaphyllus</i> | NKXS01003955.1 | 38763  | 0.20 |
| <i>H. heptaphyllus</i> | NKXS01003959.1 | 90635  | 0.20 |
| <i>H. heptaphyllus</i> | NKXS01003960.1 | 47016  | 0.20 |
| <i>H. heptaphyllus</i> | NKXS01003975.1 | 38945  | 0.20 |
| <i>H. heptaphyllus</i> | NKXS01003980.1 | 15823  | 0.20 |
| <i>H. heptaphyllus</i> | NKXS01003981.1 | 26510  | 0.20 |
| <i>H. heptaphyllus</i> | NKXS01003981.1 | 26609  | 0.20 |
| <i>H. heptaphyllus</i> | NKXS01003982.1 | 17623  | 0.20 |
| <i>H. heptaphyllus</i> | NKXS01004000.1 | 103395 | 0.20 |
| <i>H. heptaphyllus</i> | NKXS01004000.1 | 103453 | 0.20 |
| <i>H. heptaphyllus</i> | NKXS01004000.1 | 103511 | 0.20 |
| <i>H. heptaphyllus</i> | NKXS01004037.1 | 70009  | 0.20 |
| <i>H. heptaphyllus</i> | NKXS01004046.1 | 37758  | 0.20 |
| <i>H. heptaphyllus</i> | NKXS01004055.1 | 8084   | 0.20 |
| <i>H. heptaphyllus</i> | NKXS01004098.1 | 31138  | 0.20 |
| <i>H. heptaphyllus</i> | NKXS01004106.1 | 1527   | 0.20 |
| <i>H. heptaphyllus</i> | NKXS01004106.1 | 1540   | 0.20 |
| <i>H. heptaphyllus</i> | NKXS01004106.1 | 1553   | 0.20 |
| <i>H. heptaphyllus</i> | NKXS01004106.1 | 1584   | 0.20 |
| <i>H. heptaphyllus</i> | NKXS01004107.1 | 37535  | 0.20 |
| <i>H. heptaphyllus</i> | NKXS01004120.1 | 9406   | 0.20 |
| <i>H. heptaphyllus</i> | NKXS01004120.1 | 9532   | 0.20 |
| <i>H. heptaphyllus</i> | NKXS01004120.1 | 9577   | 0.20 |
| <i>H. heptaphyllus</i> | NKXS01004120.1 | 9600   | 0.20 |
| <i>H. heptaphyllus</i> | NKXS01004120.1 | 9611   | 0.20 |
| <i>H. heptaphyllus</i> | NKXS01004120.1 | 22145  | 0.20 |
| <i>H. heptaphyllus</i> | NKXS01004120.1 | 22313  | 0.20 |
| <i>H. heptaphyllus</i> | NKXS01004122.1 | 59437  | 0.20 |
| <i>H. heptaphyllus</i> | NKXS01004131.1 | 49271  | 0.20 |

|                        |                |       |      |
|------------------------|----------------|-------|------|
| <i>H. heptaphyllus</i> | NKXS01004170.1 | 48789 | 0.20 |
| <i>H. heptaphyllus</i> | NKXS01004171.1 | 6031  | 0.20 |
| <i>H. heptaphyllus</i> | NKXS01004171.1 | 17247 | 0.20 |
| <i>H. heptaphyllus</i> | NKXS01004184.1 | 74604 | 0.20 |
| <i>H. heptaphyllus</i> | NKXS01004184.1 | 74646 | 0.20 |
| <i>H. heptaphyllus</i> | NKXS01004206.1 | 14195 | 0.20 |
| <i>H. heptaphyllus</i> | NKXS01004219.1 | 73641 | 0.20 |
| <i>H. heptaphyllus</i> | NKXS01004234.1 | 44557 | 0.20 |
| <i>H. heptaphyllus</i> | NKXS01004247.1 | 38703 | 0.20 |
| <i>H. heptaphyllus</i> | NKXS01004283.1 | 13088 | 0.20 |
| <i>H. heptaphyllus</i> | NKXS01004283.1 | 60637 | 0.20 |
| <i>H. heptaphyllus</i> | NKXS01004283.1 | 60641 | 0.20 |
| <i>H. heptaphyllus</i> | NKXS01004285.1 | 20905 | 0.20 |
| <i>H. heptaphyllus</i> | NKXS01004300.1 | 49986 | 0.20 |
| <i>H. heptaphyllus</i> | NKXS01004305.1 | 10900 | 0.20 |
| <i>H. heptaphyllus</i> | NKXS01004305.1 | 10961 | 0.20 |
| <i>H. heptaphyllus</i> | NKXS01004305.1 | 10965 | 0.20 |
| <i>H. heptaphyllus</i> | NKXS01004305.1 | 11214 | 0.20 |
| <i>H. heptaphyllus</i> | NKXS01004305.1 | 11327 | 0.20 |
| <i>H. heptaphyllus</i> | NKXS01004312.1 | 1121  | 0.20 |
| <i>H. heptaphyllus</i> | NKXS01004312.1 | 1303  | 0.20 |
| <i>H. heptaphyllus</i> | NKXS01004320.1 | 45523 | 0.20 |
| <i>H. heptaphyllus</i> | NKXS01004323.1 | 3137  | 0.20 |
| <i>H. heptaphyllus</i> | NKXS01004323.1 | 3209  | 0.20 |
| <i>H. heptaphyllus</i> | NKXS01004334.1 | 90202 | 0.20 |
| <i>H. heptaphyllus</i> | NKXS01004338.1 | 17855 | 0.20 |
| <i>H. heptaphyllus</i> | NKXS01004338.1 | 17997 | 0.20 |
| <i>H. heptaphyllus</i> | NKXS01004338.1 | 18027 | 0.20 |
| <i>H. heptaphyllus</i> | NKXS01004338.1 | 18054 | 0.20 |
| <i>H. heptaphyllus</i> | NKXS01004369.1 | 11367 | 0.20 |
| <i>H. heptaphyllus</i> | NKXS01004385.1 | 28712 | 0.20 |
| <i>H. heptaphyllus</i> | NKXS01004386.1 | 6679  | 0.20 |
| <i>H. heptaphyllus</i> | NKXS01004386.1 | 6895  | 0.20 |
| <i>H. heptaphyllus</i> | NKXS01004413.1 | 52688 | 0.20 |
| <i>H. heptaphyllus</i> | NKXS01004414.1 | 1034  | 0.20 |
| <i>H. heptaphyllus</i> | NKXS01004414.1 | 1080  | 0.20 |
| <i>H. heptaphyllus</i> | NKXS01004414.1 | 1090  | 0.20 |
| <i>H. heptaphyllus</i> | NKXS01004414.1 | 1092  | 0.20 |
| <i>H. heptaphyllus</i> | NKXS01004414.1 | 1101  | 0.20 |
| <i>H. heptaphyllus</i> | NKXS01004473.1 | 7133  | 0.20 |
| <i>H. heptaphyllus</i> | NKXS01004485.1 | 10240 | 0.20 |
| <i>H. heptaphyllus</i> | NKXS01004485.1 | 10249 | 0.20 |
| <i>H. heptaphyllus</i> | NKXS01004485.1 | 10250 | 0.20 |
| <i>H. heptaphyllus</i> | NKXS01004485.1 | 10251 | 0.20 |

|                        |                |        |      |
|------------------------|----------------|--------|------|
| <i>H. heptaphyllus</i> | NKXS01004485.1 | 10276  | 0.20 |
| <i>H. heptaphyllus</i> | NKXS01004485.1 | 10280  | 0.20 |
| <i>H. heptaphyllus</i> | NKXS01004485.1 | 10312  | 0.20 |
| <i>H. heptaphyllus</i> | NKXS01004485.1 | 10395  | 0.20 |
| <i>H. heptaphyllus</i> | NKXS01004485.1 | 10428  | 0.20 |
| <i>H. heptaphyllus</i> | NKXS01004507.1 | 112309 | 0.20 |
| <i>H. heptaphyllus</i> | NKXS01004510.1 | 2908   | 0.20 |
| <i>H. heptaphyllus</i> | NKXS01004510.1 | 2910   | 0.20 |
| <i>H. heptaphyllus</i> | NKXS01004515.1 | 36877  | 0.20 |
| <i>H. heptaphyllus</i> | NKXS01004515.1 | 36919  | 0.20 |
| <i>H. heptaphyllus</i> | NKXS01004522.1 | 53231  | 0.20 |
| <i>H. heptaphyllus</i> | NKXS01004522.1 | 53246  | 0.20 |
| <i>H. heptaphyllus</i> | NKXS01004522.1 | 53258  | 0.20 |
| <i>H. heptaphyllus</i> | NKXS01004522.1 | 53264  | 0.20 |
| <i>H. heptaphyllus</i> | NKXS01004522.1 | 53307  | 0.20 |
| <i>H. heptaphyllus</i> | NKXS01004522.1 | 53309  | 0.20 |
| <i>H. heptaphyllus</i> | NKXS01004522.1 | 53312  | 0.20 |
| <i>H. heptaphyllus</i> | NKXS01004522.1 | 53321  | 0.20 |
| <i>H. heptaphyllus</i> | NKXS01004522.1 | 53339  | 0.20 |
| <i>H. heptaphyllus</i> | NKXS01004536.1 | 19442  | 0.20 |
| <i>H. heptaphyllus</i> | NKXS01004536.1 | 19447  | 0.20 |
| <i>H. heptaphyllus</i> | NKXS01004536.1 | 19548  | 0.20 |
| <i>H. heptaphyllus</i> | NKXS01004536.1 | 19588  | 0.20 |
| <i>H. heptaphyllus</i> | NKXS01004536.1 | 19593  | 0.20 |
| <i>H. heptaphyllus</i> | NKXS01004536.1 | 19595  | 0.20 |
| <i>H. heptaphyllus</i> | NKXS01004536.1 | 39287  | 0.20 |
| <i>H. heptaphyllus</i> | NKXS01004536.1 | 39347  | 0.20 |
| <i>H. heptaphyllus</i> | NKXS01004536.1 | 39489  | 0.20 |
| <i>H. heptaphyllus</i> | NKXS01004539.1 | 1427   | 0.20 |
| <i>H. heptaphyllus</i> | NKXS01004539.1 | 1502   | 0.20 |
| <i>H. heptaphyllus</i> | NKXS01004554.1 | 11659  | 0.20 |
| <i>H. heptaphyllus</i> | NKXS01004554.1 | 11754  | 0.20 |
| <i>H. heptaphyllus</i> | NKXS01004554.1 | 11850  | 0.20 |
| <i>H. heptaphyllus</i> | NKXS01004565.1 | 17345  | 0.20 |
| <i>H. heptaphyllus</i> | NKXS01004565.1 | 17360  | 0.20 |
| <i>H. heptaphyllus</i> | NKXS01004565.1 | 17385  | 0.20 |
| <i>H. heptaphyllus</i> | NKXS01004567.1 | 24389  | 0.20 |
| <i>H. heptaphyllus</i> | NKXS01004567.1 | 24511  | 0.20 |
| <i>H. heptaphyllus</i> | NKXS01004567.1 | 24556  | 0.20 |
| <i>H. heptaphyllus</i> | NKXS01004569.1 | 7110   | 0.20 |
| <i>H. heptaphyllus</i> | NKXS01004569.1 | 7141   | 0.20 |
| <i>H. heptaphyllus</i> | NKXS01004569.1 | 7278   | 0.20 |
| <i>H. heptaphyllus</i> | NKXS01004570.1 | 15943  | 0.20 |
| <i>H. heptaphyllus</i> | NKXS01004570.1 | 17213  | 0.20 |



|                        |                |       |      |
|------------------------|----------------|-------|------|
| <i>H. heptaphyllus</i> | NKXS01004570.1 | 17291 | 0.20 |
| <i>H. heptaphyllus</i> | NKXS01004570.1 | 17336 | 0.20 |
| <i>H. heptaphyllus</i> | NKXS01004570.1 | 17343 | 0.20 |
| <i>H. heptaphyllus</i> | NKXS01004570.1 | 17349 | 0.20 |
| <i>H. heptaphyllus</i> | NKXS01004583.1 | 35721 | 0.20 |
| <i>H. heptaphyllus</i> | NKXS01004611.1 | 65642 | 0.20 |
| <i>H. heptaphyllus</i> | NKXS01004611.1 | 65669 | 0.20 |
| <i>H. heptaphyllus</i> | NKXS01004612.1 | 18208 | 0.20 |
| <i>H. heptaphyllus</i> | NKXS01004612.1 | 18256 | 0.20 |
| <i>H. heptaphyllus</i> | NKXS01004620.1 | 9811  | 0.20 |
| <i>H. heptaphyllus</i> | NKXS01004620.1 | 9914  | 0.20 |
| <i>H. heptaphyllus</i> | NKXS01004620.1 | 9977  | 0.20 |
| <i>H. heptaphyllus</i> | NKXS01004626.1 | 47393 | 0.20 |
| <i>H. heptaphyllus</i> | NKXS01004644.1 | 1151  | 0.20 |
| <i>H. heptaphyllus</i> | NKXS01004696.1 | 32708 | 0.20 |
| <i>H. heptaphyllus</i> | NKXS01004705.1 | 40999 | 0.20 |
| <i>H. heptaphyllus</i> | NKXS01004750.1 | 26928 | 0.20 |
| <i>H. heptaphyllus</i> | NKXS01004768.1 | 10490 | 0.20 |
| <i>H. heptaphyllus</i> | NKXS01004773.1 | 39781 | 0.20 |
| <i>H. heptaphyllus</i> | NKXS01004778.1 | 11870 | 0.20 |
| <i>H. heptaphyllus</i> | NKXS01004782.1 | 67421 | 0.20 |
| <i>H. heptaphyllus</i> | NKXS01004801.1 | 28638 | 0.20 |
| <i>H. heptaphyllus</i> | NKXS01004803.1 | 22809 | 0.20 |
| <i>H. heptaphyllus</i> | NKXS01004803.1 | 22843 | 0.20 |
| <i>H. heptaphyllus</i> | NKXS01004803.1 | 22922 | 0.20 |
| <i>H. heptaphyllus</i> | NKXS01004803.1 | 23002 | 0.20 |
| <i>H. heptaphyllus</i> | NKXS01004803.1 | 23038 | 0.20 |
| <i>H. heptaphyllus</i> | NKXS01004804.1 | 17042 | 0.20 |
| <i>H. heptaphyllus</i> | NKXS01004804.1 | 17050 | 0.20 |
| <i>H. heptaphyllus</i> | NKXS01004804.1 | 17105 | 0.20 |
| <i>H. heptaphyllus</i> | NKXS01004821.1 | 23404 | 0.20 |
| <i>H. heptaphyllus</i> | NKXS01004829.1 | 46752 | 0.20 |
| <i>H. heptaphyllus</i> | NKXS01004837.1 | 19669 | 0.20 |
| <i>H. heptaphyllus</i> | NKXS01004837.1 | 22471 | 0.20 |
| <i>H. heptaphyllus</i> | NKXS01004838.1 | 2270  | 0.20 |
| <i>H. heptaphyllus</i> | NKXS01004838.1 | 2441  | 0.20 |
| <i>H. heptaphyllus</i> | NKXS01004852.1 | 1007  | 0.20 |
| <i>H. heptaphyllus</i> | NKXS01004877.1 | 10686 | 0.20 |
| <i>H. heptaphyllus</i> | NKXS01004877.1 | 10711 | 0.20 |
| <i>H. heptaphyllus</i> | NKXS01004877.1 | 10851 | 0.20 |
| <i>H. heptaphyllus</i> | NKXS01004888.1 | 2262  | 0.20 |
| <i>H. heptaphyllus</i> | NKXS01004913.1 | 56740 | 0.20 |
| <i>H. heptaphyllus</i> | NKXS01004913.1 | 56763 | 0.20 |
| <i>H. heptaphyllus</i> | NKXS01004913.1 | 56769 | 0.20 |

|                        |                |       |      |
|------------------------|----------------|-------|------|
| <i>H. heptaphyllus</i> | NKXS01004913.1 | 56823 | 0.20 |
| <i>H. heptaphyllus</i> | NKXS01004919.1 | 1999  | 0.20 |
| <i>H. heptaphyllus</i> | NKXS01004919.1 | 2041  | 0.20 |
| <i>H. heptaphyllus</i> | NKXS01004919.1 | 2155  | 0.20 |
| <i>H. heptaphyllus</i> | NKXS01004919.1 | 2170  | 0.20 |
| <i>H. heptaphyllus</i> | NKXS01004919.1 | 2176  | 0.20 |
| <i>H. heptaphyllus</i> | NKXS01004933.1 | 45853 | 0.20 |
| <i>H. heptaphyllus</i> | NKXS01004933.1 | 45900 | 0.20 |
| <i>H. heptaphyllus</i> | NKXS01004933.1 | 45902 | 0.20 |
| <i>H. heptaphyllus</i> | NKXS01004933.1 | 46005 | 0.20 |
| <i>H. heptaphyllus</i> | NKXS01004933.1 | 46021 | 0.20 |
| <i>H. heptaphyllus</i> | NKXS01004944.1 | 45200 | 0.20 |
| <i>H. heptaphyllus</i> | NKXS01004944.1 | 45203 | 0.20 |
| <i>H. heptaphyllus</i> | NKXS01004944.1 | 45206 | 0.20 |
| <i>H. heptaphyllus</i> | NKXS01004944.1 | 45233 | 0.20 |
| <i>H. heptaphyllus</i> | NKXS01004951.1 | 20863 | 0.20 |
| <i>H. heptaphyllus</i> | NKXS01004969.1 | 16160 | 0.20 |
| <i>H. heptaphyllus</i> | NKXS01004983.1 | 12678 | 0.20 |
| <i>H. heptaphyllus</i> | NKXS01005003.1 | 6148  | 0.20 |
| <i>H. heptaphyllus</i> | NKXS01005003.1 | 9324  | 0.20 |
| <i>H. heptaphyllus</i> | NKXS01005005.1 | 34899 | 0.20 |
| <i>H. heptaphyllus</i> | NKXS01005005.1 | 34971 | 0.20 |
| <i>H. heptaphyllus</i> | NKXS01005005.1 | 37087 | 0.20 |
| <i>H. heptaphyllus</i> | NKXS01005005.1 | 37176 | 0.20 |
| <i>H. heptaphyllus</i> | NKXS01005050.1 | 54587 | 0.20 |
| <i>H. heptaphyllus</i> | NKXS01005050.1 | 54614 | 0.20 |
| <i>H. heptaphyllus</i> | NKXS01005050.1 | 54618 | 0.20 |
| <i>H. heptaphyllus</i> | NKXS01005050.1 | 54758 | 0.20 |
| <i>H. heptaphyllus</i> | NKXS01005050.1 | 54763 | 0.20 |
| <i>H. heptaphyllus</i> | NKXS01005055.1 | 5472  | 0.20 |
| <i>H. heptaphyllus</i> | NKXS01005059.1 | 34937 | 0.20 |
| <i>H. heptaphyllus</i> | NKXS01005059.1 | 35056 | 0.20 |
| <i>H. heptaphyllus</i> | NKXS01005071.1 | 35347 | 0.20 |
| <i>H. heptaphyllus</i> | NKXS01005078.1 | 10556 | 0.20 |
| <i>H. heptaphyllus</i> | NKXS01005078.1 | 10637 | 0.20 |
| <i>H. heptaphyllus</i> | NKXS01005096.1 | 35445 | 0.20 |
| <i>H. heptaphyllus</i> | NKXS01005096.1 | 35453 | 0.20 |
| <i>H. heptaphyllus</i> | NKXS01005096.1 | 35473 | 0.20 |
| <i>H. heptaphyllus</i> | NKXS01005096.1 | 35491 | 0.20 |
| <i>H. heptaphyllus</i> | NKXS01005096.1 | 35499 | 0.20 |
| <i>H. heptaphyllus</i> | NKXS01005119.1 | 61552 | 0.20 |
| <i>H. heptaphyllus</i> | NKXS01005135.1 | 12438 | 0.20 |
| <i>H. heptaphyllus</i> | NKXS01005135.1 | 12618 | 0.20 |
| <i>H. heptaphyllus</i> | NKXS01005135.1 | 12639 | 0.20 |

|                        |                |       |      |
|------------------------|----------------|-------|------|
| <i>H. heptaphyllus</i> | NKXS01005172.1 | 42389 | 0.20 |
| <i>H. heptaphyllus</i> | NKXS01005200.1 | 5793  | 0.20 |
| <i>H. heptaphyllus</i> | NKXS01005211.1 | 55268 | 0.20 |
| <i>H. heptaphyllus</i> | NKXS01005213.1 | 31374 | 0.20 |
| <i>H. heptaphyllus</i> | NKXS01005213.1 | 31481 | 0.20 |
| <i>H. heptaphyllus</i> | NKXS01005229.1 | 43682 | 0.20 |
| <i>H. heptaphyllus</i> | NKXS01005229.1 | 43707 | 0.20 |
| <i>H. heptaphyllus</i> | NKXS01005243.1 | 45745 | 0.20 |
| <i>H. heptaphyllus</i> | NKXS01005244.1 | 22940 | 0.20 |
| <i>H. heptaphyllus</i> | NKXS01005244.1 | 22980 | 0.20 |
| <i>H. heptaphyllus</i> | NKXS01005244.1 | 23017 | 0.20 |
| <i>H. heptaphyllus</i> | NKXS01005244.1 | 23043 | 0.20 |
| <i>H. heptaphyllus</i> | NKXS01005244.1 | 23183 | 0.20 |
| <i>H. heptaphyllus</i> | NKXS01005244.1 | 23193 | 0.20 |
| <i>H. heptaphyllus</i> | NKXS01005247.1 | 15556 | 0.20 |
| <i>H. heptaphyllus</i> | NKXS01005260.1 | 801   | 0.20 |
| <i>H. heptaphyllus</i> | NKXS01005260.1 | 809   | 0.20 |
| <i>H. heptaphyllus</i> | NKXS01005260.1 | 880   | 0.20 |
| <i>H. heptaphyllus</i> | NKXS01005260.1 | 896   | 0.20 |
| <i>H. heptaphyllus</i> | NKXS01005260.1 | 904   | 0.20 |
| <i>H. heptaphyllus</i> | NKXS01005260.1 | 915   | 0.20 |
| <i>H. heptaphyllus</i> | NKXS01005260.1 | 970   | 0.20 |
| <i>H. heptaphyllus</i> | NKXS01005260.1 | 1002  | 0.20 |
| <i>H. heptaphyllus</i> | NKXS01005260.1 | 1017  | 0.20 |
| <i>H. heptaphyllus</i> | NKXS01005260.1 | 1063  | 0.20 |
| <i>H. heptaphyllus</i> | NKXS01005269.1 | 24733 | 0.20 |
| <i>H. heptaphyllus</i> | NKXS01005273.1 | 31444 | 0.20 |
| <i>H. heptaphyllus</i> | NKXS01005275.1 | 34573 | 0.20 |
| <i>H. heptaphyllus</i> | NKXS01005291.1 | 13678 | 0.20 |
| <i>H. heptaphyllus</i> | NKXS01005299.1 | 32259 | 0.20 |
| <i>H. heptaphyllus</i> | NKXS01005301.1 | 32596 | 0.20 |
| <i>H. heptaphyllus</i> | NKXS01005330.1 | 19732 | 0.20 |
| <i>H. heptaphyllus</i> | NKXS01005368.1 | 1197  | 0.20 |
| <i>H. heptaphyllus</i> | NKXS01005368.1 | 1214  | 0.20 |
| <i>H. heptaphyllus</i> | NKXS01005368.1 | 1240  | 0.20 |
| <i>H. heptaphyllus</i> | NKXS01005368.1 | 1271  | 0.20 |
| <i>H. heptaphyllus</i> | NKXS01005368.1 | 1310  | 0.20 |
| <i>H. heptaphyllus</i> | NKXS01005368.1 | 1321  | 0.20 |
| <i>H. heptaphyllus</i> | NKXS01005381.1 | 16094 | 0.20 |
| <i>H. heptaphyllus</i> | NKXS01005381.1 | 16136 | 0.20 |
| <i>H. heptaphyllus</i> | NKXS01005381.1 | 16245 | 0.20 |
| <i>H. heptaphyllus</i> | NKXS01005381.1 | 16260 | 0.20 |
| <i>H. heptaphyllus</i> | NKXS01005396.1 | 83719 | 0.20 |
| <i>H. heptaphyllus</i> | NKXS01005404.1 | 19533 | 0.20 |

|                        |                |       |      |
|------------------------|----------------|-------|------|
| <i>H. heptaphyllus</i> | NKXS01005413.1 | 36098 | 0.20 |
| <i>H. heptaphyllus</i> | NKXS01005413.1 | 36127 | 0.20 |
| <i>H. heptaphyllus</i> | NKXS01005413.1 | 36209 | 0.20 |
| <i>H. heptaphyllus</i> | NKXS01005417.1 | 48321 | 0.20 |
| <i>H. heptaphyllus</i> | NKXS01005417.1 | 48329 | 0.20 |
| <i>H. heptaphyllus</i> | NKXS01005462.1 | 21851 | 0.20 |
| <i>H. heptaphyllus</i> | NKXS01005462.1 | 21953 | 0.20 |
| <i>H. heptaphyllus</i> | NKXS01005462.1 | 22022 | 0.20 |
| <i>H. heptaphyllus</i> | NKXS01005462.1 | 22024 | 0.20 |
| <i>H. heptaphyllus</i> | NKXS01005491.1 | 39483 | 0.20 |
| <i>H. heptaphyllus</i> | NKXS01005506.1 | 13416 | 0.20 |
| <i>H. heptaphyllus</i> | NKXS01005506.1 | 13431 | 0.20 |
| <i>H. heptaphyllus</i> | NKXS01005506.1 | 13461 | 0.20 |
| <i>H. heptaphyllus</i> | NKXS01005506.1 | 13488 | 0.20 |
| <i>H. heptaphyllus</i> | NKXS01005506.1 | 13527 | 0.20 |
| <i>H. heptaphyllus</i> | NKXS01005510.1 | 10968 | 0.20 |
| <i>H. heptaphyllus</i> | NKXS01005511.1 | 6685  | 0.20 |
| <i>H. heptaphyllus</i> | NKXS01005539.1 | 27366 | 0.20 |
| <i>H. heptaphyllus</i> | NKXS01005541.1 | 11822 | 0.20 |
| <i>H. heptaphyllus</i> | NKXS01005576.1 | 27393 | 0.20 |
| <i>H. heptaphyllus</i> | NKXS01005578.1 | 3154  | 0.20 |
| <i>H. heptaphyllus</i> | NKXS01005578.1 | 3271  | 0.20 |
| <i>H. heptaphyllus</i> | NKXS01005592.1 | 926   | 0.20 |
| <i>H. heptaphyllus</i> | NKXS01005600.1 | 49888 | 0.20 |
| <i>H. heptaphyllus</i> | NKXS01005600.1 | 49901 | 0.20 |
| <i>H. heptaphyllus</i> | NKXS01005660.1 | 10643 | 0.20 |
| <i>H. heptaphyllus</i> | NKXS01005690.1 | 6447  | 0.20 |
| <i>H. heptaphyllus</i> | NKXS01005690.1 | 6470  | 0.20 |
| <i>H. heptaphyllus</i> | NKXS01005690.1 | 6523  | 0.20 |
| <i>H. heptaphyllus</i> | NKXS01005690.1 | 6571  | 0.20 |
| <i>H. heptaphyllus</i> | NKXS01005698.1 | 37906 | 0.20 |
| <i>H. heptaphyllus</i> | NKXS01005732.1 | 23291 | 0.20 |
| <i>H. heptaphyllus</i> | NKXS01005824.1 | 12621 | 0.20 |
| <i>H. heptaphyllus</i> | NKXS01005827.1 | 32317 | 0.20 |
| <i>H. heptaphyllus</i> | NKXS01005827.1 | 32356 | 0.20 |
| <i>H. heptaphyllus</i> | NKXS01005827.1 | 32465 | 0.20 |
| <i>H. heptaphyllus</i> | NKXS01005827.1 | 32488 | 0.20 |
| <i>H. heptaphyllus</i> | NKXS01005827.1 | 32489 | 0.20 |
| <i>H. heptaphyllus</i> | NKXS01005827.1 | 32517 | 0.20 |
| <i>H. heptaphyllus</i> | NKXS01005827.1 | 32545 | 0.20 |
| <i>H. heptaphyllus</i> | NKXS01005855.1 | 24054 | 0.20 |
| <i>H. heptaphyllus</i> | NKXS01005855.1 | 24066 | 0.20 |
| <i>H. heptaphyllus</i> | NKXS01005855.1 | 24205 | 0.20 |
| <i>H. heptaphyllus</i> | NKXS01005858.1 | 27186 | 0.20 |

|                        |                |       |      |
|------------------------|----------------|-------|------|
| <i>H. heptaphyllus</i> | NKXS01005867.1 | 41381 | 0.20 |
| <i>H. heptaphyllus</i> | NKXS01005867.1 | 41400 | 0.20 |
| <i>H. heptaphyllus</i> | NKXS01005867.1 | 41413 | 0.20 |
| <i>H. heptaphyllus</i> | NKXS01005915.1 | 17396 | 0.20 |
| <i>H. heptaphyllus</i> | NKXS01005943.1 | 1843  | 0.20 |
| <i>H. heptaphyllus</i> | NKXS01005950.1 | 12223 | 0.20 |
| <i>H. heptaphyllus</i> | NKXS01005950.1 | 12319 | 0.20 |
| <i>H. heptaphyllus</i> | NKXS01005974.1 | 16799 | 0.20 |
| <i>H. heptaphyllus</i> | NKXS01005984.1 | 11823 | 0.20 |
| <i>H. heptaphyllus</i> | NKXS01005984.1 | 11895 | 0.20 |
| <i>H. heptaphyllus</i> | NKXS01005992.1 | 41478 | 0.20 |
| <i>H. heptaphyllus</i> | NKXS01005998.1 | 41081 | 0.20 |
| <i>H. heptaphyllus</i> | NKXS01005998.1 | 41144 | 0.20 |
| <i>H. heptaphyllus</i> | NKXS01005998.1 | 41264 | 0.20 |
| <i>H. heptaphyllus</i> | NKXS01005998.1 | 41271 | 0.20 |
| <i>H. heptaphyllus</i> | NKXS01006017.1 | 6055  | 0.20 |
| <i>H. heptaphyllus</i> | NKXS01006043.1 | 10634 | 0.20 |
| <i>H. heptaphyllus</i> | NKXS01006044.1 | 4328  | 0.20 |
| <i>H. heptaphyllus</i> | NKXS01006044.1 | 4400  | 0.20 |
| <i>H. heptaphyllus</i> | NKXS01006071.1 | 37902 | 0.20 |
| <i>H. heptaphyllus</i> | NKXS01006071.1 | 37931 | 0.20 |
| <i>H. heptaphyllus</i> | NKXS01006071.1 | 37998 | 0.20 |
| <i>H. heptaphyllus</i> | NKXS01006071.1 | 38093 | 0.20 |
| <i>H. heptaphyllus</i> | NKXS01006071.1 | 38122 | 0.20 |
| <i>H. heptaphyllus</i> | NKXS01006095.1 | 21671 | 0.20 |
| <i>H. heptaphyllus</i> | NKXS01006095.1 | 21737 | 0.20 |
| <i>H. heptaphyllus</i> | NKXS01006095.1 | 21760 | 0.20 |
| <i>H. heptaphyllus</i> | NKXS01006095.1 | 21771 | 0.20 |
| <i>H. heptaphyllus</i> | NKXS01006095.1 | 48650 | 0.20 |
| <i>H. heptaphyllus</i> | NKXS01006095.1 | 48823 | 0.20 |
| <i>H. heptaphyllus</i> | NKXS01006095.1 | 48846 | 0.20 |
| <i>H. heptaphyllus</i> | NKXS01006096.1 | 14787 | 0.20 |
| <i>H. heptaphyllus</i> | NKXS01006096.1 | 20421 | 0.20 |
| <i>H. heptaphyllus</i> | NKXS01006096.1 | 20432 | 0.20 |
| <i>H. heptaphyllus</i> | NKXS01006096.1 | 20436 | 0.20 |
| <i>H. heptaphyllus</i> | NKXS01006107.1 | 28388 | 0.20 |
| <i>H. heptaphyllus</i> | NKXS01006107.1 | 28479 | 0.20 |
| <i>H. heptaphyllus</i> | NKXS01006206.1 | 1832  | 0.20 |
| <i>H. heptaphyllus</i> | NKXS01006206.1 | 1842  | 0.20 |
| <i>H. heptaphyllus</i> | NKXS01006206.1 | 1955  | 0.20 |
| <i>H. heptaphyllus</i> | NKXS01006215.1 | 2303  | 0.20 |
| <i>H. heptaphyllus</i> | NKXS01006218.1 | 34373 | 0.20 |
| <i>H. heptaphyllus</i> | NKXS01006225.1 | 33491 | 0.20 |
| <i>H. heptaphyllus</i> | NKXS01006225.1 | 33541 | 0.20 |

|                        |                |       |      |
|------------------------|----------------|-------|------|
| <i>H. heptaphyllus</i> | NKXS01006225.1 | 33656 | 0.20 |
| <i>H. heptaphyllus</i> | NKXS01006250.1 | 19682 | 0.20 |
| <i>H. heptaphyllus</i> | NKXS01006250.1 | 19787 | 0.20 |
| <i>H. heptaphyllus</i> | NKXS01006255.1 | 27791 | 0.20 |
| <i>H. heptaphyllus</i> | NKXS01006278.1 | 37050 | 0.20 |
| <i>H. heptaphyllus</i> | NKXS01006278.1 | 37077 | 0.20 |
| <i>H. heptaphyllus</i> | NKXS01006286.1 | 28167 | 0.20 |
| <i>H. heptaphyllus</i> | NKXS01006318.1 | 16392 | 0.20 |
| <i>H. heptaphyllus</i> | NKXS01006318.1 | 16544 | 0.20 |
| <i>H. heptaphyllus</i> | NKXS01006361.1 | 7202  | 0.20 |
| <i>H. heptaphyllus</i> | NKXS01006362.1 | 18542 | 0.20 |
| <i>H. heptaphyllus</i> | NKXS01006363.1 | 32398 | 0.20 |
| <i>H. heptaphyllus</i> | NKXS01006363.1 | 32408 | 0.20 |
| <i>H. heptaphyllus</i> | NKXS01006363.1 | 32549 | 0.20 |
| <i>H. heptaphyllus</i> | NKXS01006373.1 | 1460  | 0.20 |
| <i>H. heptaphyllus</i> | NKXS01006373.1 | 1688  | 0.20 |
| <i>H. heptaphyllus</i> | NKXS01006409.1 | 1178  | 0.20 |
| <i>H. heptaphyllus</i> | NKXS01006409.1 | 1254  | 0.20 |
| <i>H. heptaphyllus</i> | NKXS01006416.1 | 67    | 0.20 |
| <i>H. heptaphyllus</i> | NKXS01006416.1 | 37539 | 0.20 |
| <i>H. heptaphyllus</i> | NKXS01006417.1 | 32086 | 0.20 |
| <i>H. heptaphyllus</i> | NKXS01006417.1 | 32162 | 0.20 |
| <i>H. heptaphyllus</i> | NKXS01006417.1 | 32193 | 0.20 |
| <i>H. heptaphyllus</i> | NKXS01006417.1 | 32265 | 0.20 |
| <i>H. heptaphyllus</i> | NKXS01006417.1 | 32301 | 0.20 |
| <i>H. heptaphyllus</i> | NKXS01006461.1 | 30628 | 0.20 |
| <i>H. heptaphyllus</i> | NKXS01006479.1 | 13206 | 0.20 |
| <i>H. heptaphyllus</i> | NKXS01006479.1 | 34413 | 0.20 |
| <i>H. heptaphyllus</i> | NKXS01006492.1 | 57898 | 0.20 |
| <i>H. heptaphyllus</i> | NKXS01006492.1 | 57966 | 0.20 |
| <i>H. heptaphyllus</i> | NKXS01006492.1 | 58109 | 0.20 |
| <i>H. heptaphyllus</i> | NKXS01006502.1 | 38239 | 0.20 |
| <i>H. heptaphyllus</i> | NKXS01006502.1 | 38309 | 0.20 |
| <i>H. heptaphyllus</i> | NKXS01006502.1 | 40513 | 0.20 |
| <i>H. heptaphyllus</i> | NKXS01006502.1 | 40567 | 0.20 |
| <i>H. heptaphyllus</i> | NKXS01006502.1 | 40576 | 0.20 |
| <i>H. heptaphyllus</i> | NKXS01006502.1 | 40609 | 0.20 |
| <i>H. heptaphyllus</i> | NKXS01006502.1 | 40615 | 0.20 |
| <i>H. heptaphyllus</i> | NKXS01006502.1 | 40627 | 0.20 |
| <i>H. heptaphyllus</i> | NKXS01006502.1 | 40696 | 0.20 |
| <i>H. heptaphyllus</i> | NKXS01006517.1 | 4349  | 0.20 |
| <i>H. heptaphyllus</i> | NKXS01006544.1 | 13213 | 0.20 |
| <i>H. heptaphyllus</i> | NKXS01006544.1 | 13250 | 0.20 |
| <i>H. heptaphyllus</i> | NKXS01006544.1 | 18274 | 0.20 |

|                        |                |       |      |
|------------------------|----------------|-------|------|
| <i>H. heptaphyllus</i> | NKXS01006549.1 | 17641 | 0.20 |
| <i>H. heptaphyllus</i> | NKXS01006549.1 | 17690 | 0.20 |
| <i>H. heptaphyllus</i> | NKXS01006582.1 | 749   | 0.20 |
| <i>H. heptaphyllus</i> | NKXS01006624.1 | 19016 | 0.20 |
| <i>H. heptaphyllus</i> | NKXS01006639.1 | 42046 | 0.20 |
| <i>H. heptaphyllus</i> | NKXS01006639.1 | 42067 | 0.20 |
| <i>H. heptaphyllus</i> | NKXS01006639.1 | 42130 | 0.20 |
| <i>H. heptaphyllus</i> | NKXS01006708.1 | 1106  | 0.20 |
| <i>H. heptaphyllus</i> | NKXS01006714.1 | 10386 | 0.20 |
| <i>H. heptaphyllus</i> | NKXS01006714.1 | 10396 | 0.20 |
| <i>H. heptaphyllus</i> | NKXS01006714.1 | 10455 | 0.20 |
| <i>H. heptaphyllus</i> | NKXS01006719.1 | 24928 | 0.20 |
| <i>H. heptaphyllus</i> | NKXS01006719.1 | 25071 | 0.20 |
| <i>H. heptaphyllus</i> | NKXS01006737.1 | 6705  | 0.20 |
| <i>H. heptaphyllus</i> | NKXS01006737.1 | 6714  | 0.20 |
| <i>H. heptaphyllus</i> | NKXS01006737.1 | 6913  | 0.20 |
| <i>H. heptaphyllus</i> | NKXS01006737.1 | 20921 | 0.20 |
| <i>H. heptaphyllus</i> | NKXS01006737.1 | 21139 | 0.20 |
| <i>H. heptaphyllus</i> | NKXS01006737.1 | 21143 | 0.20 |
| <i>H. heptaphyllus</i> | NKXS01006737.1 | 21166 | 0.20 |
| <i>H. heptaphyllus</i> | NKXS01006737.1 | 21169 | 0.20 |
| <i>H. heptaphyllus</i> | NKXS01006883.1 | 2015  | 0.20 |
| <i>H. heptaphyllus</i> | NKXS01006920.1 | 32432 | 0.20 |
| <i>H. heptaphyllus</i> | NKXS01006978.1 | 24776 | 0.20 |
| <i>H. heptaphyllus</i> | NKXS01007084.1 | 24835 | 0.20 |
| <i>H. heptaphyllus</i> | NKXS01007084.1 | 24874 | 0.20 |
| <i>H. heptaphyllus</i> | NKXS01007084.1 | 24944 | 0.20 |
| <i>H. heptaphyllus</i> | NKXS01007084.1 | 24959 | 0.20 |
| <i>H. heptaphyllus</i> | NKXS01007119.1 | 46748 | 0.20 |
| <i>H. heptaphyllus</i> | NKXS01007124.1 | 1371  | 0.20 |
| <i>H. heptaphyllus</i> | NKXS01007124.1 | 1425  | 0.20 |
| <i>H. heptaphyllus</i> | NKXS01007124.1 | 1475  | 0.20 |
| <i>H. heptaphyllus</i> | NKXS01007124.1 | 1492  | 0.20 |
| <i>H. heptaphyllus</i> | NKXS01007155.1 | 6218  | 0.20 |
| <i>H. heptaphyllus</i> | NKXS01007175.1 | 24825 | 0.20 |
| <i>H. heptaphyllus</i> | NKXS01007175.1 | 24894 | 0.20 |
| <i>H. heptaphyllus</i> | NKXS01007189.1 | 18833 | 0.20 |
| <i>H. heptaphyllus</i> | NKXS01007218.1 | 10365 | 0.20 |
| <i>H. heptaphyllus</i> | NKXS01007229.1 | 19390 | 0.20 |
| <i>H. heptaphyllus</i> | NKXS01007229.1 | 19444 | 0.20 |
| <i>H. heptaphyllus</i> | NKXS01007229.1 | 19576 | 0.20 |
| <i>H. heptaphyllus</i> | NKXS01007229.1 | 19585 | 0.20 |
| <i>H. heptaphyllus</i> | NKXS01007229.1 | 19597 | 0.20 |
| <i>H. heptaphyllus</i> | NKXS01007235.1 | 27609 | 0.20 |

|                        |                |       |      |
|------------------------|----------------|-------|------|
| <i>H. heptaphyllus</i> | NKXS01007235.1 | 27637 | 0.20 |
| <i>H. heptaphyllus</i> | NKXS01007252.1 | 2540  | 0.20 |
| <i>H. heptaphyllus</i> | NKXS01007307.1 | 15011 | 0.20 |
| <i>H. heptaphyllus</i> | NKXS01007307.1 | 15040 | 0.20 |
| <i>H. heptaphyllus</i> | NKXS01007334.1 | 15706 | 0.20 |
| <i>H. heptaphyllus</i> | NKXS01007334.1 | 15714 | 0.20 |
| <i>H. heptaphyllus</i> | NKXS01007334.1 | 15785 | 0.20 |
| <i>H. heptaphyllus</i> | NKXS01007334.1 | 15809 | 0.20 |
| <i>H. heptaphyllus</i> | NKXS01007334.1 | 15868 | 0.20 |
| <i>H. heptaphyllus</i> | NKXS01007334.1 | 15872 | 0.20 |
| <i>H. heptaphyllus</i> | NKXS01007358.1 | 13517 | 0.20 |
| <i>H. heptaphyllus</i> | NKXS01007362.1 | 21398 | 0.20 |
| <i>H. heptaphyllus</i> | NKXS01007362.1 | 21452 | 0.20 |
| <i>H. heptaphyllus</i> | NKXS01007395.1 | 16508 | 0.20 |
| <i>H. heptaphyllus</i> | NKXS01007414.1 | 3394  | 0.20 |
| <i>H. heptaphyllus</i> | NKXS01007414.1 | 3415  | 0.20 |
| <i>H. heptaphyllus</i> | NKXS01007414.1 | 3456  | 0.20 |
| <i>H. heptaphyllus</i> | NKXS01007414.1 | 3468  | 0.20 |
| <i>H. heptaphyllus</i> | NKXS01007467.1 | 14007 | 0.20 |
| <i>H. heptaphyllus</i> | NKXS01007501.1 | 524   | 0.20 |
| <i>H. heptaphyllus</i> | NKXS01007501.1 | 546   | 0.20 |
| <i>H. heptaphyllus</i> | NKXS01007501.1 | 735   | 0.20 |
| <i>H. heptaphyllus</i> | NKXS01007519.1 | 10913 | 0.20 |
| <i>H. heptaphyllus</i> | NKXS01007575.1 | 27376 | 0.20 |
| <i>H. heptaphyllus</i> | NKXS01007667.1 | 13979 | 0.20 |
| <i>H. heptaphyllus</i> | NKXS01007683.1 | 24161 | 0.20 |
| <i>H. heptaphyllus</i> | NKXS01007688.1 | 2375  | 0.20 |
| <i>H. heptaphyllus</i> | NKXS01007701.1 | 11491 | 0.20 |
| <i>H. heptaphyllus</i> | NKXS01007742.1 | 3854  | 0.20 |
| <i>H. heptaphyllus</i> | NKXS01007785.1 | 3408  | 0.20 |
| <i>H. heptaphyllus</i> | NKXS01007812.1 | 4250  | 0.20 |
| <i>H. heptaphyllus</i> | NKXS01007825.1 | 5502  | 0.20 |
| <i>H. heptaphyllus</i> | NKXS01007844.1 | 14024 | 0.20 |
| <i>H. heptaphyllus</i> | NKXS01007844.1 | 14121 | 0.20 |
| <i>H. heptaphyllus</i> | NKXS01007844.1 | 14126 | 0.20 |
| <i>H. heptaphyllus</i> | NKXS01007910.1 | 14295 | 0.20 |
| <i>H. heptaphyllus</i> | NKXS01007910.1 | 14300 | 0.20 |
| <i>H. heptaphyllus</i> | NKXS01007933.1 | 20340 | 0.20 |
| <i>H. heptaphyllus</i> | NKXS01007933.1 | 20459 | 0.20 |
| <i>H. heptaphyllus</i> | NKXS01007933.1 | 20474 | 0.20 |
| <i>H. heptaphyllus</i> | NKXS01007936.1 | 8575  | 0.20 |
| <i>H. heptaphyllus</i> | NKXS01007936.1 | 8598  | 0.20 |
| <i>H. heptaphyllus</i> | NKXS01007936.1 | 8603  | 0.20 |
| <i>H. heptaphyllus</i> | NKXS01007936.1 | 8724  | 0.20 |



|                        |                |       |      |
|------------------------|----------------|-------|------|
| <i>H. heptaphyllus</i> | NKXS01007974.1 | 6326  | 0.20 |
| <i>H. heptaphyllus</i> | NKXS01007985.1 | 6786  | 0.20 |
| <i>H. heptaphyllus</i> | NKXS01008001.1 | 22755 | 0.20 |
| <i>H. heptaphyllus</i> | NKXS01008001.1 | 22808 | 0.20 |
| <i>H. heptaphyllus</i> | NKXS01008023.1 | 17614 | 0.20 |
| <i>H. heptaphyllus</i> | NKXS01008023.1 | 17647 | 0.20 |
| <i>H. heptaphyllus</i> | NKXS01008034.1 | 13698 | 0.20 |
| <i>H. heptaphyllus</i> | NKXS01008034.1 | 13872 | 0.20 |
| <i>H. heptaphyllus</i> | NKXS01008089.1 | 96    | 0.20 |
| <i>H. heptaphyllus</i> | NKXS01008089.1 | 102   | 0.20 |
| <i>H. heptaphyllus</i> | NKXS01008089.1 | 228   | 0.20 |
| <i>H. heptaphyllus</i> | NKXS01008089.1 | 280   | 0.20 |
| <i>H. heptaphyllus</i> | NKXS01008089.1 | 283   | 0.20 |
| <i>H. heptaphyllus</i> | NKXS01008129.1 | 10263 | 0.20 |
| <i>H. heptaphyllus</i> | NKXS01008129.1 | 10384 | 0.20 |
| <i>H. heptaphyllus</i> | NKXS01008141.1 | 19540 | 0.20 |
| <i>H. heptaphyllus</i> | NKXS01008220.1 | 22905 | 0.20 |
| <i>H. heptaphyllus</i> | NKXS01008221.1 | 5709  | 0.20 |
| <i>H. heptaphyllus</i> | NKXS01008232.1 | 17681 | 0.20 |
| <i>H. heptaphyllus</i> | NKXS01008234.1 | 3767  | 0.20 |
| <i>H. heptaphyllus</i> | NKXS01008257.1 | 8592  | 0.20 |
| <i>H. heptaphyllus</i> | NKXS01008270.1 | 710   | 0.20 |
| <i>H. heptaphyllus</i> | NKXS01008270.1 | 820   | 0.20 |
| <i>H. heptaphyllus</i> | NKXS01008270.1 | 850   | 0.20 |
| <i>H. heptaphyllus</i> | NKXS01008318.1 | 10872 | 0.20 |
| <i>H. heptaphyllus</i> | NKXS01008404.1 | 11272 | 0.20 |
| <i>H. heptaphyllus</i> | NKXS01008444.1 | 14971 | 0.20 |
| <i>H. heptaphyllus</i> | NKXS01008479.1 | 18172 | 0.20 |
| <i>H. heptaphyllus</i> | NKXS01008565.1 | 17193 | 0.20 |
| <i>H. heptaphyllus</i> | NKXS01008565.1 | 17330 | 0.20 |
| <i>H. heptaphyllus</i> | NKXS01008683.1 | 12691 | 0.20 |
| <i>H. heptaphyllus</i> | NKXS01008785.1 | 8808  | 0.20 |
| <i>H. heptaphyllus</i> | NKXS01008808.1 | 16508 | 0.20 |
| <i>H. heptaphyllus</i> | NKXS01008852.1 | 17677 | 0.20 |
| <i>H. heptaphyllus</i> | NKXS01008860.1 | 4842  | 0.20 |
| <i>H. heptaphyllus</i> | NKXS01008881.1 | 11299 | 0.20 |
| <i>H. heptaphyllus</i> | NKXS01008881.1 | 11339 | 0.20 |
| <i>H. heptaphyllus</i> | NKXS01008881.1 | 11353 | 0.20 |
| <i>H. heptaphyllus</i> | NKXS01008881.1 | 11389 | 0.20 |
| <i>H. heptaphyllus</i> | NKXS01008881.1 | 11448 | 0.20 |
| <i>H. heptaphyllus</i> | NKXS01008896.1 | 9427  | 0.20 |
| <i>H. heptaphyllus</i> | NKXS01008935.1 | 9637  | 0.20 |
| <i>H. heptaphyllus</i> | NKXS01008935.1 | 9643  | 0.20 |
| <i>H. heptaphyllus</i> | NKXS01008935.1 | 9696  | 0.20 |

|                        |                |       |      |
|------------------------|----------------|-------|------|
| <i>H. heptaphyllus</i> | NKXS01008935.1 | 9812  | 0.20 |
| <i>H. heptaphyllus</i> | NKXS01008985.1 | 9862  | 0.20 |
| <i>H. heptaphyllus</i> | NKXS01008985.1 | 9919  | 0.20 |
| <i>H. heptaphyllus</i> | NKXS01009013.1 | 2034  | 0.20 |
| <i>H. heptaphyllus</i> | NKXS01009188.1 | 8847  | 0.20 |
| <i>H. heptaphyllus</i> | NKXS01009290.1 | 12839 | 0.20 |
| <i>H. heptaphyllus</i> | NKXS01009402.1 | 949   | 0.20 |
| <i>H. heptaphyllus</i> | NKXS01009500.1 | 10125 | 0.20 |
| <i>H. heptaphyllus</i> | NKXS01009757.1 | 2028  | 0.20 |
| <i>H. heptaphyllus</i> | NKXS01009757.1 | 2176  | 0.20 |
| <i>H. heptaphyllus</i> | NKXS01009757.1 | 2295  | 0.20 |
| <i>H. heptaphyllus</i> | NKXS01009795.1 | 1460  | 0.20 |
| <i>H. heptaphyllus</i> | NKXS01009797.1 | 5471  | 0.20 |
| <i>H. heptaphyllus</i> | NKXS01009797.1 | 5515  | 0.20 |
| <i>H. heptaphyllus</i> | NKXS01009959.1 | 2817  | 0.20 |
| <i>H. heptaphyllus</i> | NKXS01009959.1 | 2818  | 0.20 |
| <i>H. heptaphyllus</i> | NKXS01009959.1 | 2835  | 0.20 |
| <i>H. heptaphyllus</i> | NKXS01009959.1 | 2837  | 0.20 |
| <i>H. heptaphyllus</i> | NKXS01009959.1 | 2986  | 0.20 |
| <i>H. heptaphyllus</i> | NKXS01009959.1 | 3048  | 0.20 |
| <i>H. heptaphyllus</i> | NKXS01009989.1 | 5080  | 0.20 |
| <i>H. heptaphyllus</i> | NKXS01009989.1 | 5157  | 0.20 |
| <i>H. heptaphyllus</i> | NKXS01009989.1 | 5165  | 0.20 |
| <i>H. heptaphyllus</i> | NKXS01009989.1 | 5166  | 0.20 |
| <i>H. heptaphyllus</i> | NKXS01009989.1 | 5186  | 0.20 |
| <i>H. heptaphyllus</i> | NKXS01009989.1 | 5236  | 0.20 |
| <i>H. heptaphyllus</i> | NKXS01009989.1 | 5238  | 0.20 |
| <i>H. heptaphyllus</i> | NKXS01010229.1 | 7431  | 0.20 |
| <i>H. heptaphyllus</i> | NKXS01010229.1 | 7456  | 0.20 |
| <i>H. heptaphyllus</i> | NKXS01010285.1 | 71    | 0.20 |
| <i>H. heptaphyllus</i> | NKXS01010343.1 | 7996  | 0.20 |
| <i>H. heptaphyllus</i> | NKXS01010512.1 | 6754  | 0.20 |
| <i>H. heptaphyllus</i> | NKXS01010569.1 | 4631  | 0.20 |
| <i>H. heptaphyllus</i> | NKXS01010569.1 | 4831  | 0.20 |
| <i>H. heptaphyllus</i> | NKXS01010721.1 | 1270  | 0.20 |
| <i>H. heptaphyllus</i> | NKXS01010721.1 | 1376  | 0.20 |
| <i>H. heptaphyllus</i> | NKXS01010783.1 | 2710  | 0.20 |
| <i>H. heptaphyllus</i> | NKXS01010886.1 | 1497  | 0.20 |
| <i>H. heptaphyllus</i> | NKXS01010886.1 | 1507  | 0.20 |
| <i>H. heptaphyllus</i> | NKXS01010886.1 | 1509  | 0.20 |
| <i>H. heptaphyllus</i> | NKXS01010910.1 | 3154  | 0.20 |
| <i>H. heptaphyllus</i> | NKXS01011194.1 | 345   | 0.20 |
| <i>H. heptaphyllus</i> | NKXS01011194.1 | 362   | 0.20 |
| <i>H. heptaphyllus</i> | NKXS01011684.1 | 246   | 0.20 |

|                        |                |      |      |
|------------------------|----------------|------|------|
| <i>H. heptaphyllus</i> | NKXS01012054.1 | 396  | 0.20 |
| <i>H. heptaphyllus</i> | NKXS01012054.1 | 400  | 0.20 |
| <i>H. heptaphyllus</i> | NKXS01012054.1 | 497  | 0.20 |
| <i>H. heptaphyllus</i> | NKXS01012069.1 | 844  | 0.20 |
| <i>H. heptaphyllus</i> | NKXS01012273.1 | 1124 | 0.20 |
| <i>H. heptaphyllus</i> | NKXS01012273.1 | 1158 | 0.20 |
| <i>H. heptaphyllus</i> | NKXS01012273.1 | 1176 | 0.20 |
| <i>H. heptaphyllus</i> | NKXS01012273.1 | 1218 | 0.20 |
| <i>H. heptaphyllus</i> | NKXS01012343.1 | 457  | 0.20 |
| <i>H. heptaphyllus</i> | NKXS01012343.1 | 580  | 0.20 |
| <i>H. heptaphyllus</i> | NKXS01012343.1 | 595  | 0.20 |
| <i>H. heptaphyllus</i> | NKXS01012469.1 | 1085 | 0.20 |
| <i>H. heptaphyllus</i> | NKXS01012523.1 | 703  | 0.20 |
| <i>H. heptaphyllus</i> | NKXS01012523.1 | 761  | 0.20 |

---
