# Supplementary material for: Identification of Commercial Cultivars in the Tabebuia Alliance Using Genotyping-by-Sequencing
Source: MDPI journal article supplement (doi:10.3390/f14020271), 2023-01-31
Supplement: s1 [file s1]

**Table S6.** High-quality loci could be used for distinguish cultivar in *H. impetiginosus*

| Species                 | Scaffolds      | Position | Rate of no-majority genotype |
|-------------------------|----------------|----------|------------------------------|
| <i>H. impetiginosus</i> | NKXS01000164.1 | 87113    | 0.63                         |
| <i>H. impetiginosus</i> | NKXS01000600.1 | 280543   | 0.63                         |
| <i>H. impetiginosus</i> | NKXS01000610.1 | 45214    | 0.63                         |
| <i>H. impetiginosus</i> | NKXS01001083.1 | 140007   | 0.63                         |
| <i>H. impetiginosus</i> | NKXS01001996.1 | 61263    | 0.63                         |
| <i>H. impetiginosus</i> | NKXS01002938.1 | 53057    | 0.63                         |
| <i>H. impetiginosus</i> | NKXS01003382.1 | 14814    | 0.63                         |
| <i>H. impetiginosus</i> | NKXS01003382.1 | 14865    | 0.63                         |
| <i>H. impetiginosus</i> | NKXS01003382.1 | 14875    | 0.63                         |
| <i>H. impetiginosus</i> | NKXS01003775.1 | 20451    | 0.63                         |
| <i>H. impetiginosus</i> | NKXS01003956.1 | 23739    | 0.63                         |
| <i>H. impetiginosus</i> | NKXS01003956.1 | 23937    | 0.63                         |
| <i>H. impetiginosus</i> | NKXS01004069.1 | 81710    | 0.63                         |
| <i>H. impetiginosus</i> | NKXS01005510.1 | 73117    | 0.63                         |
| <i>H. impetiginosus</i> | NKXS01005943.1 | 1895     | 0.63                         |
| <i>H. impetiginosus</i> | NKXS01006619.1 | 34742    | 0.63                         |
| <i>H. impetiginosus</i> | NKXS01006739.1 | 20576    | 0.63                         |
| <i>H. impetiginosus</i> | NKXS01007146.1 | 13441    | 0.63                         |
| <i>H. impetiginosus</i> | NKXS01008073.1 | 8769     | 0.63                         |
| <i>H. impetiginosus</i> | NKXS01000079.1 | 44761    | 0.56                         |
| <i>H. impetiginosus</i> | NKXS01000164.1 | 87075    | 0.56                         |
| <i>H. impetiginosus</i> | NKXS01000164.1 | 87195    | 0.56                         |
| <i>H. impetiginosus</i> | NKXS01000164.1 | 87227    | 0.56                         |
| <i>H. impetiginosus</i> | NKXS01000172.1 | 90698    | 0.56                         |
| <i>H. impetiginosus</i> | NKXS01000172.1 | 90771    | 0.56                         |
| <i>H. impetiginosus</i> | NKXS01000172.1 | 90772    | 0.56                         |
| <i>H. impetiginosus</i> | NKXS01000269.1 | 49781    | 0.56                         |
| <i>H. impetiginosus</i> | NKXS01000278.1 | 104473   | 0.56                         |
| <i>H. impetiginosus</i> | NKXS01000344.1 | 70735    | 0.56                         |
| <i>H. impetiginosus</i> | NKXS01000371.1 | 63143    | 0.56                         |
| <i>H. impetiginosus</i> | NKXS01000437.1 | 46058    | 0.56                         |
| <i>H. impetiginosus</i> | NKXS01000570.1 | 126470   | 0.56                         |
| <i>H. impetiginosus</i> | NKXS01000655.1 | 56561    | 0.56                         |
| <i>H. impetiginosus</i> | NKXS01000672.1 | 10223    | 0.56                         |
| <i>H. impetiginosus</i> | NKXS01000733.1 | 6943     | 0.56                         |
| <i>H. impetiginosus</i> | NKXS01000863.1 | 153908   | 0.56                         |
| <i>H. impetiginosus</i> | NKXS01000892.1 | 72723    | 0.56                         |
| <i>H. impetiginosus</i> | NKXS01001083.1 | 140142   | 0.56                         |
| <i>H. impetiginosus</i> | NKXS01001144.1 | 41574    | 0.56                         |
| <i>H. impetiginosus</i> | NKXS01001144.1 | 41780    | 0.56                         |
| <i>H. impetiginosus</i> | NKXS01001144.1 | 41788    | 0.56                         |

|                         |                |        |      |
|-------------------------|----------------|--------|------|
| <i>H. impetiginosus</i> | NKXS01001180.1 | 23285  | 0.56 |
| <i>H. impetiginosus</i> | NKXS01001180.1 | 23365  | 0.56 |
| <i>H. impetiginosus</i> | NKXS01001777.1 | 28760  | 0.56 |
| <i>H. impetiginosus</i> | NKXS01001790.1 | 154399 | 0.56 |
| <i>H. impetiginosus</i> | NKXS01001880.1 | 98749  | 0.56 |
| <i>H. impetiginosus</i> | NKXS01001996.1 | 61098  | 0.56 |
| <i>H. impetiginosus</i> | NKXS01002126.1 | 81421  | 0.56 |
| <i>H. impetiginosus</i> | NKXS01002249.1 | 56862  | 0.56 |
| <i>H. impetiginosus</i> | NKXS01002257.1 | 74908  | 0.56 |
| <i>H. impetiginosus</i> | NKXS01002288.1 | 2096   | 0.56 |
| <i>H. impetiginosus</i> | NKXS01002344.1 | 83516  | 0.56 |
| <i>H. impetiginosus</i> | NKXS01002344.1 | 83730  | 0.56 |
| <i>H. impetiginosus</i> | NKXS01002344.1 | 83753  | 0.56 |
| <i>H. impetiginosus</i> | NKXS01002344.1 | 83763  | 0.56 |
| <i>H. impetiginosus</i> | NKXS01002346.1 | 139455 | 0.56 |
| <i>H. impetiginosus</i> | NKXS01002685.1 | 77235  | 0.56 |
| <i>H. impetiginosus</i> | NKXS01002823.1 | 69037  | 0.56 |
| <i>H. impetiginosus</i> | NKXS01002839.1 | 9237   | 0.56 |
| <i>H. impetiginosus</i> | NKXS01002839.1 | 9308   | 0.56 |
| <i>H. impetiginosus</i> | NKXS01003154.1 | 72163  | 0.56 |
| <i>H. impetiginosus</i> | NKXS01003154.1 | 72208  | 0.56 |
| <i>H. impetiginosus</i> | NKXS01003295.1 | 47813  | 0.56 |
| <i>H. impetiginosus</i> | NKXS01003382.1 | 14903  | 0.56 |
| <i>H. impetiginosus</i> | NKXS01003382.1 | 14925  | 0.56 |
| <i>H. impetiginosus</i> | NKXS01003382.1 | 15014  | 0.56 |
| <i>H. impetiginosus</i> | NKXS01003382.1 | 15105  | 0.56 |
| <i>H. impetiginosus</i> | NKXS01003382.1 | 15129  | 0.56 |
| <i>H. impetiginosus</i> | NKXS01003399.1 | 26782  | 0.56 |
| <i>H. impetiginosus</i> | NKXS01003507.1 | 41017  | 0.56 |
| <i>H. impetiginosus</i> | NKXS01003956.1 | 23933  | 0.56 |
| <i>H. impetiginosus</i> | NKXS01003982.1 | 17539  | 0.56 |
| <i>H. impetiginosus</i> | NKXS01004069.1 | 81720  | 0.56 |
| <i>H. impetiginosus</i> | NKXS01004342.1 | 36716  | 0.56 |
| <i>H. impetiginosus</i> | NKXS01004342.1 | 36790  | 0.56 |
| <i>H. impetiginosus</i> | NKXS01004778.1 | 11870  | 0.56 |
| <i>H. impetiginosus</i> | NKXS01005071.1 | 42626  | 0.56 |
| <i>H. impetiginosus</i> | NKXS01005071.1 | 42686  | 0.56 |
| <i>H. impetiginosus</i> | NKXS01005071.1 | 42782  | 0.56 |
| <i>H. impetiginosus</i> | NKXS01005540.1 | 4991   | 0.56 |
| <i>H. impetiginosus</i> | NKXS01005598.1 | 21468  | 0.56 |
| <i>H. impetiginosus</i> | NKXS01006013.1 | 1335   | 0.56 |
| <i>H. impetiginosus</i> | NKXS01006013.1 | 1407   | 0.56 |
| <i>H. impetiginosus</i> | NKXS01006417.1 | 32124  | 0.56 |
| <i>H. impetiginosus</i> | NKXS01006417.1 | 32130  | 0.56 |

|                         |                |        |      |
|-------------------------|----------------|--------|------|
| <i>H. impetiginosus</i> | NKXS01006417.1 | 32135  | 0.56 |
| <i>H. impetiginosus</i> | NKXS01006417.1 | 32162  | 0.56 |
| <i>H. impetiginosus</i> | NKXS01006417.1 | 32219  | 0.56 |
| <i>H. impetiginosus</i> | NKXS01006417.1 | 32322  | 0.56 |
| <i>H. impetiginosus</i> | NKXS01006619.1 | 34760  | 0.56 |
| <i>H. impetiginosus</i> | NKXS01006659.1 | 22405  | 0.56 |
| <i>H. impetiginosus</i> | NKXS01006659.1 | 22411  | 0.56 |
| <i>H. impetiginosus</i> | NKXS01006659.1 | 22576  | 0.56 |
| <i>H. impetiginosus</i> | NKXS01007049.1 | 23559  | 0.56 |
| <i>H. impetiginosus</i> | NKXS01007300.1 | 22893  | 0.56 |
| <i>H. impetiginosus</i> | NKXS01007300.1 | 22931  | 0.56 |
| <i>H. impetiginosus</i> | NKXS01007300.1 | 23110  | 0.56 |
| <i>H. impetiginosus</i> | NKXS01007461.1 | 21438  | 0.56 |
| <i>H. impetiginosus</i> | NKXS01007461.1 | 21591  | 0.56 |
| <i>H. impetiginosus</i> | NKXS01007461.1 | 21615  | 0.56 |
| <i>H. impetiginosus</i> | NKXS01007461.1 | 21628  | 0.56 |
| <i>H. impetiginosus</i> | NKXS01008084.1 | 3768   | 0.56 |
| <i>H. impetiginosus</i> | NKXS01008235.1 | 23418  | 0.56 |
| <i>H. impetiginosus</i> | NKXS01008275.1 | 4665   | 0.56 |
| <i>H. impetiginosus</i> | NKXS01008275.1 | 4698   | 0.56 |
| <i>H. impetiginosus</i> | NKXS01008346.1 | 17374  | 0.56 |
| <i>H. impetiginosus</i> | NKXS01008346.1 | 17382  | 0.56 |
| <i>H. impetiginosus</i> | NKXS01008346.1 | 17409  | 0.56 |
| <i>H. impetiginosus</i> | NKXS01012469.1 | 937    | 0.56 |
| <i>H. impetiginosus</i> | NKXS01000051.1 | 32087  | 0.50 |
| <i>H. impetiginosus</i> | NKXS01000064.1 | 78809  | 0.50 |
| <i>H. impetiginosus</i> | NKXS01000064.1 | 78827  | 0.50 |
| <i>H. impetiginosus</i> | NKXS01000094.1 | 113197 | 0.50 |
| <i>H. impetiginosus</i> | NKXS01000102.1 | 199250 | 0.50 |
| <i>H. impetiginosus</i> | NKXS01000102.1 | 199429 | 0.50 |
| <i>H. impetiginosus</i> | NKXS01000151.1 | 303015 | 0.50 |
| <i>H. impetiginosus</i> | NKXS01000172.1 | 90752  | 0.50 |
| <i>H. impetiginosus</i> | NKXS01000186.1 | 15563  | 0.50 |
| <i>H. impetiginosus</i> | NKXS01000186.1 | 15582  | 0.50 |
| <i>H. impetiginosus</i> | NKXS01000298.1 | 171580 | 0.50 |
| <i>H. impetiginosus</i> | NKXS01000298.1 | 171642 | 0.50 |
| <i>H. impetiginosus</i> | NKXS01000298.1 | 171784 | 0.50 |
| <i>H. impetiginosus</i> | NKXS01000304.1 | 89064  | 0.50 |
| <i>H. impetiginosus</i> | NKXS01000304.1 | 89166  | 0.50 |
| <i>H. impetiginosus</i> | NKXS01000324.1 | 30894  | 0.50 |
| <i>H. impetiginosus</i> | NKXS01000327.1 | 39298  | 0.50 |
| <i>H. impetiginosus</i> | NKXS01000327.1 | 39314  | 0.50 |
| <i>H. impetiginosus</i> | NKXS01000367.1 | 61607  | 0.50 |
| <i>H. impetiginosus</i> | NKXS01000415.1 | 85439  | 0.50 |

|                         |                |        |      |
|-------------------------|----------------|--------|------|
| <i>H. impetiginosus</i> | NKXS01000415.1 | 85498  | 0.50 |
| <i>H. impetiginosus</i> | NKXS01000419.1 | 156041 | 0.50 |
| <i>H. impetiginosus</i> | NKXS01000437.1 | 6101   | 0.50 |
| <i>H. impetiginosus</i> | NKXS01000437.1 | 6108   | 0.50 |
| <i>H. impetiginosus</i> | NKXS01000437.1 | 6112   | 0.50 |
| <i>H. impetiginosus</i> | NKXS01000437.1 | 6132   | 0.50 |
| <i>H. impetiginosus</i> | NKXS01000437.1 | 6139   | 0.50 |
| <i>H. impetiginosus</i> | NKXS01000493.1 | 10147  | 0.50 |
| <i>H. impetiginosus</i> | NKXS01000520.1 | 88695  | 0.50 |
| <i>H. impetiginosus</i> | NKXS01000568.1 | 58213  | 0.50 |
| <i>H. impetiginosus</i> | NKXS01000568.1 | 58250  | 0.50 |
| <i>H. impetiginosus</i> | NKXS01000568.1 | 58254  | 0.50 |
| <i>H. impetiginosus</i> | NKXS01000568.1 | 58255  | 0.50 |
| <i>H. impetiginosus</i> | NKXS01000568.1 | 58273  | 0.50 |
| <i>H. impetiginosus</i> | NKXS01000568.1 | 58315  | 0.50 |
| <i>H. impetiginosus</i> | NKXS01000568.1 | 58428  | 0.50 |
| <i>H. impetiginosus</i> | NKXS01000568.1 | 58443  | 0.50 |
| <i>H. impetiginosus</i> | NKXS01000570.1 | 126467 | 0.50 |
| <i>H. impetiginosus</i> | NKXS01000582.1 | 6356   | 0.50 |
| <i>H. impetiginosus</i> | NKXS01000615.1 | 11574  | 0.50 |
| <i>H. impetiginosus</i> | NKXS01000655.1 | 56481  | 0.50 |
| <i>H. impetiginosus</i> | NKXS01000662.1 | 79576  | 0.50 |
| <i>H. impetiginosus</i> | NKXS01000662.1 | 95977  | 0.50 |
| <i>H. impetiginosus</i> | NKXS01000733.1 | 91060  | 0.50 |
| <i>H. impetiginosus</i> | NKXS01000733.1 | 91130  | 0.50 |
| <i>H. impetiginosus</i> | NKXS01000734.1 | 42721  | 0.50 |
| <i>H. impetiginosus</i> | NKXS01000734.1 | 42850  | 0.50 |
| <i>H. impetiginosus</i> | NKXS01000759.1 | 29185  | 0.50 |
| <i>H. impetiginosus</i> | NKXS01000796.1 | 54915  | 0.50 |
| <i>H. impetiginosus</i> | NKXS01000796.1 | 54942  | 0.50 |
| <i>H. impetiginosus</i> | NKXS01000845.1 | 78971  | 0.50 |
| <i>H. impetiginosus</i> | NKXS01000858.1 | 21765  | 0.50 |
| <i>H. impetiginosus</i> | NKXS01000863.1 | 153989 | 0.50 |
| <i>H. impetiginosus</i> | NKXS01000863.1 | 154031 | 0.50 |
| <i>H. impetiginosus</i> | NKXS01000863.1 | 154055 | 0.50 |
| <i>H. impetiginosus</i> | NKXS01000863.1 | 154106 | 0.50 |
| <i>H. impetiginosus</i> | NKXS01000883.1 | 40754  | 0.50 |
| <i>H. impetiginosus</i> | NKXS01000891.1 | 36053  | 0.50 |
| <i>H. impetiginosus</i> | NKXS01000905.1 | 102567 | 0.50 |
| <i>H. impetiginosus</i> | NKXS01000905.1 | 102578 | 0.50 |
| <i>H. impetiginosus</i> | NKXS01000905.1 | 102580 | 0.50 |
| <i>H. impetiginosus</i> | NKXS01000905.1 | 102608 | 0.50 |
| <i>H. impetiginosus</i> | NKXS01000905.1 | 102651 | 0.50 |
| <i>H. impetiginosus</i> | NKXS01000905.1 | 102680 | 0.50 |

|                         |                |        |      |
|-------------------------|----------------|--------|------|
| <i>H. impetiginosus</i> | NKXS01000945.1 | 34520  | 0.50 |
| <i>H. impetiginosus</i> | NKXS01000945.1 | 34619  | 0.50 |
| <i>H. impetiginosus</i> | NKXS01000952.1 | 53518  | 0.50 |
| <i>H. impetiginosus</i> | NKXS01000952.1 | 53615  | 0.50 |
| <i>H. impetiginosus</i> | NKXS01000973.1 | 10707  | 0.50 |
| <i>H. impetiginosus</i> | NKXS01001129.1 | 107742 | 0.50 |
| <i>H. impetiginosus</i> | NKXS01001129.1 | 107752 | 0.50 |
| <i>H. impetiginosus</i> | NKXS01001129.1 | 107784 | 0.50 |
| <i>H. impetiginosus</i> | NKXS01001187.1 | 91166  | 0.50 |
| <i>H. impetiginosus</i> | NKXS01001211.1 | 24840  | 0.50 |
| <i>H. impetiginosus</i> | NKXS01001225.1 | 152380 | 0.50 |
| <i>H. impetiginosus</i> | NKXS01001314.1 | 64491  | 0.50 |
| <i>H. impetiginosus</i> | NKXS01001328.1 | 60442  | 0.50 |
| <i>H. impetiginosus</i> | NKXS01001366.1 | 34000  | 0.50 |
| <i>H. impetiginosus</i> | NKXS01001400.1 | 20287  | 0.50 |
| <i>H. impetiginosus</i> | NKXS01001418.1 | 48413  | 0.50 |
| <i>H. impetiginosus</i> | NKXS01001418.1 | 48469  | 0.50 |
| <i>H. impetiginosus</i> | NKXS01001440.1 | 145959 | 0.50 |
| <i>H. impetiginosus</i> | NKXS01001440.1 | 146031 | 0.50 |
| <i>H. impetiginosus</i> | NKXS01001442.1 | 40159  | 0.50 |
| <i>H. impetiginosus</i> | NKXS01001459.1 | 10461  | 0.50 |
| <i>H. impetiginosus</i> | NKXS01001459.1 | 10570  | 0.50 |
| <i>H. impetiginosus</i> | NKXS01001471.1 | 19649  | 0.50 |
| <i>H. impetiginosus</i> | NKXS01001620.1 | 21958  | 0.50 |
| <i>H. impetiginosus</i> | NKXS01001626.1 | 48028  | 0.50 |
| <i>H. impetiginosus</i> | NKXS01001642.1 | 75976  | 0.50 |
| <i>H. impetiginosus</i> | NKXS01001647.1 | 79021  | 0.50 |
| <i>H. impetiginosus</i> | NKXS01001710.1 | 67099  | 0.50 |
| <i>H. impetiginosus</i> | NKXS01001749.1 | 4487   | 0.50 |
| <i>H. impetiginosus</i> | NKXS01001749.1 | 4501   | 0.50 |
| <i>H. impetiginosus</i> | NKXS01001749.1 | 4549   | 0.50 |
| <i>H. impetiginosus</i> | NKXS01001755.1 | 55483  | 0.50 |
| <i>H. impetiginosus</i> | NKXS01001777.1 | 28627  | 0.50 |
| <i>H. impetiginosus</i> | NKXS01001880.1 | 98551  | 0.50 |
| <i>H. impetiginosus</i> | NKXS01001880.1 | 98766  | 0.50 |
| <i>H. impetiginosus</i> | NKXS01001898.1 | 22927  | 0.50 |
| <i>H. impetiginosus</i> | NKXS01001904.1 | 114560 | 0.50 |
| <i>H. impetiginosus</i> | NKXS01001995.1 | 47443  | 0.50 |
| <i>H. impetiginosus</i> | NKXS01002006.1 | 36038  | 0.50 |
| <i>H. impetiginosus</i> | NKXS01002016.1 | 115625 | 0.50 |
| <i>H. impetiginosus</i> | NKXS01002071.1 | 83403  | 0.50 |
| <i>H. impetiginosus</i> | NKXS01002071.1 | 83523  | 0.50 |
| <i>H. impetiginosus</i> | NKXS01002071.1 | 83570  | 0.50 |
| <i>H. impetiginosus</i> | NKXS01002108.1 | 3668   | 0.50 |

|                         |                |       |      |
|-------------------------|----------------|-------|------|
| <i>H. impetiginosus</i> | NKXS01002108.1 | 3861  | 0.50 |
| <i>H. impetiginosus</i> | NKXS01002148.1 | 57004 | 0.50 |
| <i>H. impetiginosus</i> | NKXS01002248.1 | 71675 | 0.50 |
| <i>H. impetiginosus</i> | NKXS01002288.1 | 1914  | 0.50 |
| <i>H. impetiginosus</i> | NKXS01002288.1 | 1944  | 0.50 |
| <i>H. impetiginosus</i> | NKXS01002288.1 | 1983  | 0.50 |
| <i>H. impetiginosus</i> | NKXS01002288.1 | 1991  | 0.50 |
| <i>H. impetiginosus</i> | NKXS01002288.1 | 2010  | 0.50 |
| <i>H. impetiginosus</i> | NKXS01002288.1 | 2020  | 0.50 |
| <i>H. impetiginosus</i> | NKXS01002327.1 | 69975 | 0.50 |
| <i>H. impetiginosus</i> | NKXS01002327.1 | 70075 | 0.50 |
| <i>H. impetiginosus</i> | NKXS01002327.1 | 70170 | 0.50 |
| <i>H. impetiginosus</i> | NKXS01002327.1 | 70187 | 0.50 |
| <i>H. impetiginosus</i> | NKXS01002411.1 | 90706 | 0.50 |
| <i>H. impetiginosus</i> | NKXS01002417.1 | 97679 | 0.50 |
| <i>H. impetiginosus</i> | NKXS01002450.1 | 48107 | 0.50 |
| <i>H. impetiginosus</i> | NKXS01002555.1 | 35382 | 0.50 |
| <i>H. impetiginosus</i> | NKXS01002576.1 | 20775 | 0.50 |
| <i>H. impetiginosus</i> | NKXS01002628.1 | 3914  | 0.50 |
| <i>H. impetiginosus</i> | NKXS01002646.1 | 40749 | 0.50 |
| <i>H. impetiginosus</i> | NKXS01002646.1 | 40769 | 0.50 |
| <i>H. impetiginosus</i> | NKXS01002691.1 | 42838 | 0.50 |
| <i>H. impetiginosus</i> | NKXS01002691.1 | 42953 | 0.50 |
| <i>H. impetiginosus</i> | NKXS01002703.1 | 85478 | 0.50 |
| <i>H. impetiginosus</i> | NKXS01002742.1 | 393   | 0.50 |
| <i>H. impetiginosus</i> | NKXS01002745.1 | 33405 | 0.50 |
| <i>H. impetiginosus</i> | NKXS01002762.1 | 642   | 0.50 |
| <i>H. impetiginosus</i> | NKXS01002762.1 | 668   | 0.50 |
| <i>H. impetiginosus</i> | NKXS01003043.1 | 74725 | 0.50 |
| <i>H. impetiginosus</i> | NKXS01003043.1 | 74905 | 0.50 |
| <i>H. impetiginosus</i> | NKXS01003058.1 | 82658 | 0.50 |
| <i>H. impetiginosus</i> | NKXS01003269.1 | 5972  | 0.50 |
| <i>H. impetiginosus</i> | NKXS01003278.1 | 59827 | 0.50 |
| <i>H. impetiginosus</i> | NKXS01003402.1 | 10865 | 0.50 |
| <i>H. impetiginosus</i> | NKXS01003474.1 | 55867 | 0.50 |
| <i>H. impetiginosus</i> | NKXS01003480.1 | 9478  | 0.50 |
| <i>H. impetiginosus</i> | NKXS01003528.1 | 5149  | 0.50 |
| <i>H. impetiginosus</i> | NKXS01003536.1 | 6117  | 0.50 |
| <i>H. impetiginosus</i> | NKXS01003549.1 | 49496 | 0.50 |
| <i>H. impetiginosus</i> | NKXS01003552.1 | 46941 | 0.50 |
| <i>H. impetiginosus</i> | NKXS01003576.1 | 35435 | 0.50 |
| <i>H. impetiginosus</i> | NKXS01003579.1 | 73036 | 0.50 |
| <i>H. impetiginosus</i> | NKXS01003599.1 | 2528  | 0.50 |
| <i>H. impetiginosus</i> | NKXS01003628.1 | 37265 | 0.50 |

|                         |                |        |      |
|-------------------------|----------------|--------|------|
| <i>H. impetiginosus</i> | NKXS01003628.1 | 37440  | 0.50 |
| <i>H. impetiginosus</i> | NKXS01003646.1 | 74515  | 0.50 |
| <i>H. impetiginosus</i> | NKXS01003686.1 | 10191  | 0.50 |
| <i>H. impetiginosus</i> | NKXS01003707.1 | 24369  | 0.50 |
| <i>H. impetiginosus</i> | NKXS01003764.1 | 5129   | 0.50 |
| <i>H. impetiginosus</i> | NKXS01003929.1 | 51094  | 0.50 |
| <i>H. impetiginosus</i> | NKXS01003929.1 | 51184  | 0.50 |
| <i>H. impetiginosus</i> | NKXS01003949.1 | 34149  | 0.50 |
| <i>H. impetiginosus</i> | NKXS01003949.1 | 34158  | 0.50 |
| <i>H. impetiginosus</i> | NKXS01003949.1 | 34197  | 0.50 |
| <i>H. impetiginosus</i> | NKXS01003956.1 | 23921  | 0.50 |
| <i>H. impetiginosus</i> | NKXS01003984.1 | 39481  | 0.50 |
| <i>H. impetiginosus</i> | NKXS01004000.1 | 103547 | 0.50 |
| <i>H. impetiginosus</i> | NKXS01004120.1 | 22148  | 0.50 |
| <i>H. impetiginosus</i> | NKXS01004137.1 | 28999  | 0.50 |
| <i>H. impetiginosus</i> | NKXS01004137.1 | 29000  | 0.50 |
| <i>H. impetiginosus</i> | NKXS01004137.1 | 29001  | 0.50 |
| <i>H. impetiginosus</i> | NKXS01004177.1 | 922    | 0.50 |
| <i>H. impetiginosus</i> | NKXS01004235.1 | 60205  | 0.50 |
| <i>H. impetiginosus</i> | NKXS01004235.1 | 60223  | 0.50 |
| <i>H. impetiginosus</i> | NKXS01004342.1 | 36845  | 0.50 |
| <i>H. impetiginosus</i> | NKXS01004381.1 | 56565  | 0.50 |
| <i>H. impetiginosus</i> | NKXS01004437.1 | 14687  | 0.50 |
| <i>H. impetiginosus</i> | NKXS01004437.1 | 14732  | 0.50 |
| <i>H. impetiginosus</i> | NKXS01004579.1 | 41304  | 0.50 |
| <i>H. impetiginosus</i> | NKXS01004626.1 | 8809   | 0.50 |
| <i>H. impetiginosus</i> | NKXS01004756.1 | 15430  | 0.50 |
| <i>H. impetiginosus</i> | NKXS01004905.1 | 8605   | 0.50 |
| <i>H. impetiginosus</i> | NKXS01004966.1 | 55876  | 0.50 |
| <i>H. impetiginosus</i> | NKXS01005193.1 | 27820  | 0.50 |
| <i>H. impetiginosus</i> | NKXS01005193.1 | 36299  | 0.50 |
| <i>H. impetiginosus</i> | NKXS01005193.1 | 36342  | 0.50 |
| <i>H. impetiginosus</i> | NKXS01005193.1 | 36367  | 0.50 |
| <i>H. impetiginosus</i> | NKXS01005232.1 | 25644  | 0.50 |
| <i>H. impetiginosus</i> | NKXS01005413.1 | 36126  | 0.50 |
| <i>H. impetiginosus</i> | NKXS01005413.1 | 36129  | 0.50 |
| <i>H. impetiginosus</i> | NKXS01005413.1 | 36265  | 0.50 |
| <i>H. impetiginosus</i> | NKXS01005576.1 | 27372  | 0.50 |
| <i>H. impetiginosus</i> | NKXS01005576.1 | 27579  | 0.50 |
| <i>H. impetiginosus</i> | NKXS01005865.1 | 29099  | 0.50 |
| <i>H. impetiginosus</i> | NKXS01006013.1 | 9271   | 0.50 |
| <i>H. impetiginosus</i> | NKXS01006013.1 | 9420   | 0.50 |
| <i>H. impetiginosus</i> | NKXS01006017.1 | 6198   | 0.50 |
| <i>H. impetiginosus</i> | NKXS01006043.1 | 30542  | 0.50 |

|                         |                |       |      |
|-------------------------|----------------|-------|------|
| <i>H. impetiginosus</i> | NKXS01006155.1 | 17251 | 0.50 |
| <i>H. impetiginosus</i> | NKXS01006164.1 | 11093 | 0.50 |
| <i>H. impetiginosus</i> | NKXS01006422.1 | 35127 | 0.50 |
| <i>H. impetiginosus</i> | NKXS01006438.1 | 29510 | 0.50 |
| <i>H. impetiginosus</i> | NKXS01006438.1 | 29511 | 0.50 |
| <i>H. impetiginosus</i> | NKXS01006438.1 | 29607 | 0.50 |
| <i>H. impetiginosus</i> | NKXS01006522.1 | 35767 | 0.50 |
| <i>H. impetiginosus</i> | NKXS01006544.1 | 13180 | 0.50 |
| <i>H. impetiginosus</i> | NKXS01006544.1 | 13181 | 0.50 |
| <i>H. impetiginosus</i> | NKXS01006544.1 | 13276 | 0.50 |
| <i>H. impetiginosus</i> | NKXS01006544.1 | 13286 | 0.50 |
| <i>H. impetiginosus</i> | NKXS01006751.1 | 25756 | 0.50 |
| <i>H. impetiginosus</i> | NKXS01006800.1 | 19506 | 0.50 |
| <i>H. impetiginosus</i> | NKXS01006800.1 | 19592 | 0.50 |
| <i>H. impetiginosus</i> | NKXS01006855.1 | 16754 | 0.50 |
| <i>H. impetiginosus</i> | NKXS01007218.1 | 10359 | 0.50 |
| <i>H. impetiginosus</i> | NKXS01007229.1 | 19019 | 0.50 |
| <i>H. impetiginosus</i> | NKXS01007229.1 | 19035 | 0.50 |
| <i>H. impetiginosus</i> | NKXS01007229.1 | 19048 | 0.50 |
| <i>H. impetiginosus</i> | NKXS01007229.1 | 19501 | 0.50 |
| <i>H. impetiginosus</i> | NKXS01007395.1 | 16397 | 0.50 |
| <i>H. impetiginosus</i> | NKXS01007455.1 | 15203 | 0.50 |
| <i>H. impetiginosus</i> | NKXS01007455.1 | 15319 | 0.50 |
| <i>H. impetiginosus</i> | NKXS01007455.1 | 15393 | 0.50 |
| <i>H. impetiginosus</i> | NKXS01007461.1 | 21526 | 0.50 |
| <i>H. impetiginosus</i> | NKXS01007461.1 | 21635 | 0.50 |
| <i>H. impetiginosus</i> | NKXS01007696.1 | 11408 | 0.50 |
| <i>H. impetiginosus</i> | NKXS01007696.1 | 11539 | 0.50 |
| <i>H. impetiginosus</i> | NKXS01007696.1 | 11541 | 0.50 |
| <i>H. impetiginosus</i> | NKXS01007696.1 | 11567 | 0.50 |
| <i>H. impetiginosus</i> | NKXS01008001.1 | 22767 | 0.50 |
| <i>H. impetiginosus</i> | NKXS01008197.1 | 14006 | 0.50 |
| <i>H. impetiginosus</i> | NKXS01008364.1 | 7463  | 0.50 |
| <i>H. impetiginosus</i> | NKXS01008898.1 | 4416  | 0.50 |
| <i>H. impetiginosus</i> | NKXS01009093.1 | 4043  | 0.50 |
| <i>H. impetiginosus</i> | NKXS01009093.1 | 4095  | 0.50 |
| <i>H. impetiginosus</i> | NKXS01009093.1 | 4215  | 0.50 |
| <i>H. impetiginosus</i> | NKXS01009107.1 | 8066  | 0.50 |
| <i>H. impetiginosus</i> | NKXS01009188.1 | 8790  | 0.50 |
| <i>H. impetiginosus</i> | NKXS01009188.1 | 8805  | 0.50 |
| <i>H. impetiginosus</i> | NKXS01009290.1 | 12887 | 0.50 |
| <i>H. impetiginosus</i> | NKXS01009549.1 | 511   | 0.50 |
| <i>H. impetiginosus</i> | NKXS01012469.1 | 916   | 0.50 |
| <i>H. impetiginosus</i> | NKXS01000003.1 | 5917  | 0.44 |



|                         |                |        |      |
|-------------------------|----------------|--------|------|
| <i>H. impetiginosus</i> | NKXS01000003.1 | 6028   | 0.44 |
| <i>H. impetiginosus</i> | NKXS01000003.1 | 6141   | 0.44 |
| <i>H. impetiginosus</i> | NKXS01000006.1 | 229571 | 0.44 |
| <i>H. impetiginosus</i> | NKXS01000021.1 | 211211 | 0.44 |
| <i>H. impetiginosus</i> | NKXS01000023.1 | 461324 | 0.44 |
| <i>H. impetiginosus</i> | NKXS01000032.1 | 190819 | 0.44 |
| <i>H. impetiginosus</i> | NKXS01000039.1 | 130167 | 0.44 |
| <i>H. impetiginosus</i> | NKXS01000039.1 | 130230 | 0.44 |
| <i>H. impetiginosus</i> | NKXS01000051.1 | 55045  | 0.44 |
| <i>H. impetiginosus</i> | NKXS01000067.1 | 5322   | 0.44 |
| <i>H. impetiginosus</i> | NKXS01000079.1 | 36135  | 0.44 |
| <i>H. impetiginosus</i> | NKXS01000094.1 | 113170 | 0.44 |
| <i>H. impetiginosus</i> | NKXS01000094.1 | 113226 | 0.44 |
| <i>H. impetiginosus</i> | NKXS01000094.1 | 184759 | 0.44 |
| <i>H. impetiginosus</i> | NKXS01000098.1 | 27665  | 0.44 |
| <i>H. impetiginosus</i> | NKXS01000098.1 | 27734  | 0.44 |
| <i>H. impetiginosus</i> | NKXS01000098.1 | 27758  | 0.44 |
| <i>H. impetiginosus</i> | NKXS01000098.1 | 27764  | 0.44 |
| <i>H. impetiginosus</i> | NKXS01000098.1 | 27876  | 0.44 |
| <i>H. impetiginosus</i> | NKXS01000123.1 | 156616 | 0.44 |
| <i>H. impetiginosus</i> | NKXS01000157.1 | 189297 | 0.44 |
| <i>H. impetiginosus</i> | NKXS01000174.1 | 5176   | 0.44 |
| <i>H. impetiginosus</i> | NKXS01000174.1 | 5186   | 0.44 |
| <i>H. impetiginosus</i> | NKXS01000174.1 | 5248   | 0.44 |
| <i>H. impetiginosus</i> | NKXS01000186.1 | 222598 | 0.44 |
| <i>H. impetiginosus</i> | NKXS01000263.1 | 7642   | 0.44 |
| <i>H. impetiginosus</i> | NKXS01000304.1 | 59639  | 0.44 |
| <i>H. impetiginosus</i> | NKXS01000304.1 | 59694  | 0.44 |
| <i>H. impetiginosus</i> | NKXS01000304.1 | 59748  | 0.44 |
| <i>H. impetiginosus</i> | NKXS01000304.1 | 59755  | 0.44 |
| <i>H. impetiginosus</i> | NKXS01000304.1 | 59771  | 0.44 |
| <i>H. impetiginosus</i> | NKXS01000315.1 | 50818  | 0.44 |
| <i>H. impetiginosus</i> | NKXS01000324.1 | 31109  | 0.44 |
| <i>H. impetiginosus</i> | NKXS01000353.1 | 11208  | 0.44 |
| <i>H. impetiginosus</i> | NKXS01000364.1 | 30433  | 0.44 |
| <i>H. impetiginosus</i> | NKXS01000364.1 | 30457  | 0.44 |
| <i>H. impetiginosus</i> | NKXS01000364.1 | 30592  | 0.44 |
| <i>H. impetiginosus</i> | NKXS01000367.1 | 9611   | 0.44 |
| <i>H. impetiginosus</i> | NKXS01000375.1 | 165087 | 0.44 |
| <i>H. impetiginosus</i> | NKXS01000437.1 | 5905   | 0.44 |
| <i>H. impetiginosus</i> | NKXS01000437.1 | 5917   | 0.44 |
| <i>H. impetiginosus</i> | NKXS01000455.1 | 123552 | 0.44 |
| <i>H. impetiginosus</i> | NKXS01000472.1 | 111358 | 0.44 |
| <i>H. impetiginosus</i> | NKXS01000494.1 | 29557  | 0.44 |

|                         |                |        |      |
|-------------------------|----------------|--------|------|
| <i>H. impetiginosus</i> | NKXS01000546.1 | 25150  | 0.44 |
| <i>H. impetiginosus</i> | NKXS01000582.1 | 6379   | 0.44 |
| <i>H. impetiginosus</i> | NKXS01000582.1 | 6444   | 0.44 |
| <i>H. impetiginosus</i> | NKXS01000600.1 | 137544 | 0.44 |
| <i>H. impetiginosus</i> | NKXS01000655.1 | 56473  | 0.44 |
| <i>H. impetiginosus</i> | NKXS01000655.1 | 56637  | 0.44 |
| <i>H. impetiginosus</i> | NKXS01000661.1 | 7514   | 0.44 |
| <i>H. impetiginosus</i> | NKXS01000662.1 | 79448  | 0.44 |
| <i>H. impetiginosus</i> | NKXS01000662.1 | 79525  | 0.44 |
| <i>H. impetiginosus</i> | NKXS01000662.1 | 79550  | 0.44 |
| <i>H. impetiginosus</i> | NKXS01000704.1 | 47253  | 0.44 |
| <i>H. impetiginosus</i> | NKXS01000719.1 | 153049 | 0.44 |
| <i>H. impetiginosus</i> | NKXS01000775.1 | 82957  | 0.44 |
| <i>H. impetiginosus</i> | NKXS01000822.1 | 1548   | 0.44 |
| <i>H. impetiginosus</i> | NKXS01000850.1 | 126433 | 0.44 |
| <i>H. impetiginosus</i> | NKXS01000891.1 | 34590  | 0.44 |
| <i>H. impetiginosus</i> | NKXS01000891.1 | 34593  | 0.44 |
| <i>H. impetiginosus</i> | NKXS01000927.1 | 91159  | 0.44 |
| <i>H. impetiginosus</i> | NKXS01000950.1 | 50941  | 0.44 |
| <i>H. impetiginosus</i> | NKXS01000965.1 | 113911 | 0.44 |
| <i>H. impetiginosus</i> | NKXS01000965.1 | 114068 | 0.44 |
| <i>H. impetiginosus</i> | NKXS01000973.1 | 10746  | 0.44 |
| <i>H. impetiginosus</i> | NKXS01000995.1 | 12177  | 0.44 |
| <i>H. impetiginosus</i> | NKXS01001011.1 | 69555  | 0.44 |
| <i>H. impetiginosus</i> | NKXS01001087.1 | 53498  | 0.44 |
| <i>H. impetiginosus</i> | NKXS01001111.1 | 83122  | 0.44 |
| <i>H. impetiginosus</i> | NKXS01001142.1 | 80436  | 0.44 |
| <i>H. impetiginosus</i> | NKXS01001150.1 | 121133 | 0.44 |
| <i>H. impetiginosus</i> | NKXS01001160.1 | 29009  | 0.44 |
| <i>H. impetiginosus</i> | NKXS01001187.1 | 91193  | 0.44 |
| <i>H. impetiginosus</i> | NKXS01001189.1 | 63286  | 0.44 |
| <i>H. impetiginosus</i> | NKXS01001189.1 | 63300  | 0.44 |
| <i>H. impetiginosus</i> | NKXS01001189.1 | 226878 | 0.44 |
| <i>H. impetiginosus</i> | NKXS01001211.1 | 24755  | 0.44 |
| <i>H. impetiginosus</i> | NKXS01001211.1 | 166752 | 0.44 |
| <i>H. impetiginosus</i> | NKXS01001245.1 | 45084  | 0.44 |
| <i>H. impetiginosus</i> | NKXS01001289.1 | 55297  | 0.44 |
| <i>H. impetiginosus</i> | NKXS01001289.1 | 55300  | 0.44 |
| <i>H. impetiginosus</i> | NKXS01001366.1 | 34003  | 0.44 |
| <i>H. impetiginosus</i> | NKXS01001400.1 | 10071  | 0.44 |
| <i>H. impetiginosus</i> | NKXS01001423.1 | 85320  | 0.44 |
| <i>H. impetiginosus</i> | NKXS01001425.1 | 19695  | 0.44 |
| <i>H. impetiginosus</i> | NKXS01001430.1 | 123339 | 0.44 |
| <i>H. impetiginosus</i> | NKXS01001430.1 | 123354 | 0.44 |

|                         |                |        |      |
|-------------------------|----------------|--------|------|
| <i>H. impetiginosus</i> | NKXS01001435.1 | 40290  | 0.44 |
| <i>H. impetiginosus</i> | NKXS01001435.1 | 46384  | 0.44 |
| <i>H. impetiginosus</i> | NKXS01001440.1 | 146025 | 0.44 |
| <i>H. impetiginosus</i> | NKXS01001442.1 | 40204  | 0.44 |
| <i>H. impetiginosus</i> | NKXS01001477.1 | 65124  | 0.44 |
| <i>H. impetiginosus</i> | NKXS01001483.1 | 39630  | 0.44 |
| <i>H. impetiginosus</i> | NKXS01001626.1 | 48098  | 0.44 |
| <i>H. impetiginosus</i> | NKXS01001691.1 | 67268  | 0.44 |
| <i>H. impetiginosus</i> | NKXS01001744.1 | 121764 | 0.44 |
| <i>H. impetiginosus</i> | NKXS01001744.1 | 121777 | 0.44 |
| <i>H. impetiginosus</i> | NKXS01001744.1 | 121932 | 0.44 |
| <i>H. impetiginosus</i> | NKXS01001777.1 | 28718  | 0.44 |
| <i>H. impetiginosus</i> | NKXS01001857.1 | 31136  | 0.44 |
| <i>H. impetiginosus</i> | NKXS01001904.1 | 114492 | 0.44 |
| <i>H. impetiginosus</i> | NKXS01001944.1 | 34917  | 0.44 |
| <i>H. impetiginosus</i> | NKXS01001972.1 | 100302 | 0.44 |
| <i>H. impetiginosus</i> | NKXS01001972.1 | 100357 | 0.44 |
| <i>H. impetiginosus</i> | NKXS01001972.1 | 100470 | 0.44 |
| <i>H. impetiginosus</i> | NKXS01001972.1 | 100476 | 0.44 |
| <i>H. impetiginosus</i> | NKXS01001995.1 | 112454 | 0.44 |
| <i>H. impetiginosus</i> | NKXS01001995.1 | 112531 | 0.44 |
| <i>H. impetiginosus</i> | NKXS01002061.1 | 110347 | 0.44 |
| <i>H. impetiginosus</i> | NKXS01002122.1 | 125123 | 0.44 |
| <i>H. impetiginosus</i> | NKXS01002148.1 | 12282  | 0.44 |
| <i>H. impetiginosus</i> | NKXS01002148.1 | 56932  | 0.44 |
| <i>H. impetiginosus</i> | NKXS01002148.1 | 57162  | 0.44 |
| <i>H. impetiginosus</i> | NKXS01002183.1 | 90623  | 0.44 |
| <i>H. impetiginosus</i> | NKXS01002196.1 | 20240  | 0.44 |
| <i>H. impetiginosus</i> | NKXS01002249.1 | 56691  | 0.44 |
| <i>H. impetiginosus</i> | NKXS01002250.1 | 81950  | 0.44 |
| <i>H. impetiginosus</i> | NKXS01002327.1 | 37308  | 0.44 |
| <i>H. impetiginosus</i> | NKXS01002327.1 | 70012  | 0.44 |
| <i>H. impetiginosus</i> | NKXS01002396.1 | 10289  | 0.44 |
| <i>H. impetiginosus</i> | NKXS01002396.1 | 10406  | 0.44 |
| <i>H. impetiginosus</i> | NKXS01002411.1 | 90658  | 0.44 |
| <i>H. impetiginosus</i> | NKXS01002470.1 | 34978  | 0.44 |
| <i>H. impetiginosus</i> | NKXS01002470.1 | 34984  | 0.44 |
| <i>H. impetiginosus</i> | NKXS01002470.1 | 34986  | 0.44 |
| <i>H. impetiginosus</i> | NKXS01002470.1 | 34988  | 0.44 |
| <i>H. impetiginosus</i> | NKXS01002470.1 | 34989  | 0.44 |
| <i>H. impetiginosus</i> | NKXS01002470.1 | 34990  | 0.44 |
| <i>H. impetiginosus</i> | NKXS01002490.1 | 38380  | 0.44 |
| <i>H. impetiginosus</i> | NKXS01002545.1 | 6239   | 0.44 |
| <i>H. impetiginosus</i> | NKXS01002576.1 | 20778  | 0.44 |

|                         |                |        |      |
|-------------------------|----------------|--------|------|
| <i>H. impetiginosus</i> | NKXS01002625.1 | 65989  | 0.44 |
| <i>H. impetiginosus</i> | NKXS01002625.1 | 66014  | 0.44 |
| <i>H. impetiginosus</i> | NKXS01002633.1 | 83177  | 0.44 |
| <i>H. impetiginosus</i> | NKXS01002684.1 | 2898   | 0.44 |
| <i>H. impetiginosus</i> | NKXS01002685.1 | 52095  | 0.44 |
| <i>H. impetiginosus</i> | NKXS01002686.1 | 51201  | 0.44 |
| <i>H. impetiginosus</i> | NKXS01002686.1 | 51278  | 0.44 |
| <i>H. impetiginosus</i> | NKXS01002686.1 | 51289  | 0.44 |
| <i>H. impetiginosus</i> | NKXS01002686.1 | 51331  | 0.44 |
| <i>H. impetiginosus</i> | NKXS01002686.1 | 51429  | 0.44 |
| <i>H. impetiginosus</i> | NKXS01002687.1 | 15796  | 0.44 |
| <i>H. impetiginosus</i> | NKXS01002705.1 | 210400 | 0.44 |
| <i>H. impetiginosus</i> | NKXS01002705.1 | 210583 | 0.44 |
| <i>H. impetiginosus</i> | NKXS01002705.1 | 210588 | 0.44 |
| <i>H. impetiginosus</i> | NKXS01002705.1 | 210609 | 0.44 |
| <i>H. impetiginosus</i> | NKXS01002726.1 | 16079  | 0.44 |
| <i>H. impetiginosus</i> | NKXS01002726.1 | 16251  | 0.44 |
| <i>H. impetiginosus</i> | NKXS01002726.1 | 16252  | 0.44 |
| <i>H. impetiginosus</i> | NKXS01002728.1 | 47962  | 0.44 |
| <i>H. impetiginosus</i> | NKXS01002730.1 | 26393  | 0.44 |
| <i>H. impetiginosus</i> | NKXS01002745.1 | 33564  | 0.44 |
| <i>H. impetiginosus</i> | NKXS01002762.1 | 608    | 0.44 |
| <i>H. impetiginosus</i> | NKXS01002762.1 | 659    | 0.44 |
| <i>H. impetiginosus</i> | NKXS01002782.1 | 5434   | 0.44 |
| <i>H. impetiginosus</i> | NKXS01002873.1 | 106567 | 0.44 |
| <i>H. impetiginosus</i> | NKXS01002955.1 | 69087  | 0.44 |
| <i>H. impetiginosus</i> | NKXS01003022.1 | 13410  | 0.44 |
| <i>H. impetiginosus</i> | NKXS01003022.1 | 13471  | 0.44 |
| <i>H. impetiginosus</i> | NKXS01003149.1 | 54063  | 0.44 |
| <i>H. impetiginosus</i> | NKXS01003149.1 | 54151  | 0.44 |
| <i>H. impetiginosus</i> | NKXS01003269.1 | 5805   | 0.44 |
| <i>H. impetiginosus</i> | NKXS01003271.1 | 69687  | 0.44 |
| <i>H. impetiginosus</i> | NKXS01003292.1 | 36756  | 0.44 |
| <i>H. impetiginosus</i> | NKXS01003399.1 | 26644  | 0.44 |
| <i>H. impetiginosus</i> | NKXS01003418.1 | 65362  | 0.44 |
| <i>H. impetiginosus</i> | NKXS01003418.1 | 65492  | 0.44 |
| <i>H. impetiginosus</i> | NKXS01003480.1 | 9433   | 0.44 |
| <i>H. impetiginosus</i> | NKXS01003549.1 | 31310  | 0.44 |
| <i>H. impetiginosus</i> | NKXS01003549.1 | 49647  | 0.44 |
| <i>H. impetiginosus</i> | NKXS01003550.1 | 4037   | 0.44 |
| <i>H. impetiginosus</i> | NKXS01003583.1 | 40677  | 0.44 |
| <i>H. impetiginosus</i> | NKXS01003596.1 | 102742 | 0.44 |
| <i>H. impetiginosus</i> | NKXS01003765.1 | 15740  | 0.44 |
| <i>H. impetiginosus</i> | NKXS01003765.1 | 15882  | 0.44 |

|                         |                |       |      |
|-------------------------|----------------|-------|------|
| <i>H. impetiginosus</i> | NKXS01003781.1 | 48644 | 0.44 |
| <i>H. impetiginosus</i> | NKXS01003861.1 | 69084 | 0.44 |
| <i>H. impetiginosus</i> | NKXS01003972.1 | 46592 | 0.44 |
| <i>H. impetiginosus</i> | NKXS01004091.1 | 2709  | 0.44 |
| <i>H. impetiginosus</i> | NKXS01004091.1 | 2740  | 0.44 |
| <i>H. impetiginosus</i> | NKXS01004091.1 | 2760  | 0.44 |
| <i>H. impetiginosus</i> | NKXS01004098.1 | 32325 | 0.44 |
| <i>H. impetiginosus</i> | NKXS01004137.1 | 28903 | 0.44 |
| <i>H. impetiginosus</i> | NKXS01004137.1 | 29045 | 0.44 |
| <i>H. impetiginosus</i> | NKXS01004137.1 | 29087 | 0.44 |
| <i>H. impetiginosus</i> | NKXS01004217.1 | 12964 | 0.44 |
| <i>H. impetiginosus</i> | NKXS01004312.1 | 1268  | 0.44 |
| <i>H. impetiginosus</i> | NKXS01004369.1 | 11255 | 0.44 |
| <i>H. impetiginosus</i> | NKXS01004369.1 | 11333 | 0.44 |
| <i>H. impetiginosus</i> | NKXS01004369.1 | 11367 | 0.44 |
| <i>H. impetiginosus</i> | NKXS01004369.1 | 11487 | 0.44 |
| <i>H. impetiginosus</i> | NKXS01004381.1 | 56605 | 0.44 |
| <i>H. impetiginosus</i> | NKXS01004381.1 | 56658 | 0.44 |
| <i>H. impetiginosus</i> | NKXS01004421.1 | 46175 | 0.44 |
| <i>H. impetiginosus</i> | NKXS01004421.1 | 46274 | 0.44 |
| <i>H. impetiginosus</i> | NKXS01004421.1 | 46376 | 0.44 |
| <i>H. impetiginosus</i> | NKXS01004421.1 | 46404 | 0.44 |
| <i>H. impetiginosus</i> | NKXS01004437.1 | 14632 | 0.44 |
| <i>H. impetiginosus</i> | NKXS01004437.1 | 14820 | 0.44 |
| <i>H. impetiginosus</i> | NKXS01004443.1 | 85760 | 0.44 |
| <i>H. impetiginosus</i> | NKXS01004449.1 | 55705 | 0.44 |
| <i>H. impetiginosus</i> | NKXS01004449.1 | 72985 | 0.44 |
| <i>H. impetiginosus</i> | NKXS01004449.1 | 73036 | 0.44 |
| <i>H. impetiginosus</i> | NKXS01004485.1 | 10282 | 0.44 |
| <i>H. impetiginosus</i> | NKXS01004485.1 | 10411 | 0.44 |
| <i>H. impetiginosus</i> | NKXS01004489.1 | 18415 | 0.44 |
| <i>H. impetiginosus</i> | NKXS01004489.1 | 18597 | 0.44 |
| <i>H. impetiginosus</i> | NKXS01004491.1 | 18087 | 0.44 |
| <i>H. impetiginosus</i> | NKXS01004493.1 | 36975 | 0.44 |
| <i>H. impetiginosus</i> | NKXS01004513.1 | 34048 | 0.44 |
| <i>H. impetiginosus</i> | NKXS01004611.1 | 65642 | 0.44 |
| <i>H. impetiginosus</i> | NKXS01004756.1 | 15487 | 0.44 |
| <i>H. impetiginosus</i> | NKXS01004756.1 | 15631 | 0.44 |
| <i>H. impetiginosus</i> | NKXS01004803.1 | 22922 | 0.44 |
| <i>H. impetiginosus</i> | NKXS01004804.1 | 17117 | 0.44 |
| <i>H. impetiginosus</i> | NKXS01004820.1 | 15025 | 0.44 |
| <i>H. impetiginosus</i> | NKXS01004877.1 | 10657 | 0.44 |
| <i>H. impetiginosus</i> | NKXS01004911.1 | 5394  | 0.44 |
| <i>H. impetiginosus</i> | NKXS01004911.1 | 5456  | 0.44 |

|                         |                |       |      |
|-------------------------|----------------|-------|------|
| <i>H. impetiginosus</i> | NKXS01004943.1 | 93831 | 0.44 |
| <i>H. impetiginosus</i> | NKXS01004944.1 | 44934 | 0.44 |
| <i>H. impetiginosus</i> | NKXS01004944.1 | 44946 | 0.44 |
| <i>H. impetiginosus</i> | NKXS01004944.1 | 45080 | 0.44 |
| <i>H. impetiginosus</i> | NKXS01004944.1 | 45090 | 0.44 |
| <i>H. impetiginosus</i> | NKXS01004944.1 | 45092 | 0.44 |
| <i>H. impetiginosus</i> | NKXS01004944.1 | 45119 | 0.44 |
| <i>H. impetiginosus</i> | NKXS01004944.1 | 45200 | 0.44 |
| <i>H. impetiginosus</i> | NKXS01005059.1 | 34868 | 0.44 |
| <i>H. impetiginosus</i> | NKXS01005135.1 | 12558 | 0.44 |
| <i>H. impetiginosus</i> | NKXS01005218.1 | 41616 | 0.44 |
| <i>H. impetiginosus</i> | NKXS01005388.1 | 6027  | 0.44 |
| <i>H. impetiginosus</i> | NKXS01005396.1 | 83601 | 0.44 |
| <i>H. impetiginosus</i> | NKXS01005446.1 | 31412 | 0.44 |
| <i>H. impetiginosus</i> | NKXS01005486.1 | 8549  | 0.44 |
| <i>H. impetiginosus</i> | NKXS01005486.1 | 8623  | 0.44 |
| <i>H. impetiginosus</i> | NKXS01005539.1 | 27510 | 0.44 |
| <i>H. impetiginosus</i> | NKXS01005553.1 | 4234  | 0.44 |
| <i>H. impetiginosus</i> | NKXS01005617.1 | 13461 | 0.44 |
| <i>H. impetiginosus</i> | NKXS01005726.1 | 27799 | 0.44 |
| <i>H. impetiginosus</i> | NKXS01005858.1 | 12044 | 0.44 |
| <i>H. impetiginosus</i> | NKXS01005933.1 | 49685 | 0.44 |
| <i>H. impetiginosus</i> | NKXS01006011.1 | 4662  | 0.44 |
| <i>H. impetiginosus</i> | NKXS01006017.1 | 6125  | 0.44 |
| <i>H. impetiginosus</i> | NKXS01006020.1 | 2581  | 0.44 |
| <i>H. impetiginosus</i> | NKXS01006020.1 | 2695  | 0.44 |
| <i>H. impetiginosus</i> | NKXS01006078.1 | 22058 | 0.44 |
| <i>H. impetiginosus</i> | NKXS01006078.1 | 22252 | 0.44 |
| <i>H. impetiginosus</i> | NKXS01006078.1 | 22286 | 0.44 |
| <i>H. impetiginosus</i> | NKXS01006078.1 | 22297 | 0.44 |
| <i>H. impetiginosus</i> | NKXS01006150.1 | 36072 | 0.44 |
| <i>H. impetiginosus</i> | NKXS01006151.1 | 20590 | 0.44 |
| <i>H. impetiginosus</i> | NKXS01006151.1 | 20677 | 0.44 |
| <i>H. impetiginosus</i> | NKXS01006200.1 | 15382 | 0.44 |
| <i>H. impetiginosus</i> | NKXS01006201.1 | 20179 | 0.44 |
| <i>H. impetiginosus</i> | NKXS01006228.1 | 23250 | 0.44 |
| <i>H. impetiginosus</i> | NKXS01006228.1 | 23263 | 0.44 |
| <i>H. impetiginosus</i> | NKXS01006228.1 | 23272 | 0.44 |
| <i>H. impetiginosus</i> | NKXS01006228.1 | 23399 | 0.44 |
| <i>H. impetiginosus</i> | NKXS01006314.1 | 62640 | 0.44 |
| <i>H. impetiginosus</i> | NKXS01006376.1 | 31226 | 0.44 |
| <i>H. impetiginosus</i> | NKXS01006511.1 | 34030 | 0.44 |
| <i>H. impetiginosus</i> | NKXS01006511.1 | 34052 | 0.44 |
| <i>H. impetiginosus</i> | NKXS01006577.1 | 16973 | 0.44 |

|                         |                |       |      |
|-------------------------|----------------|-------|------|
| <i>H. impetiginosus</i> | NKXS01006577.1 | 16982 | 0.44 |
| <i>H. impetiginosus</i> | NKXS01006639.1 | 42016 | 0.44 |
| <i>H. impetiginosus</i> | NKXS01006639.1 | 42136 | 0.44 |
| <i>H. impetiginosus</i> | NKXS01006659.1 | 22491 | 0.44 |
| <i>H. impetiginosus</i> | NKXS01006679.1 | 1759  | 0.44 |
| <i>H. impetiginosus</i> | NKXS01006781.1 | 8630  | 0.44 |
| <i>H. impetiginosus</i> | NKXS01006800.1 | 19610 | 0.44 |
| <i>H. impetiginosus</i> | NKXS01006806.1 | 16474 | 0.44 |
| <i>H. impetiginosus</i> | NKXS01006855.1 | 16818 | 0.44 |
| <i>H. impetiginosus</i> | NKXS01006920.1 | 32298 | 0.44 |
| <i>H. impetiginosus</i> | NKXS01006931.1 | 27331 | 0.44 |
| <i>H. impetiginosus</i> | NKXS01006931.1 | 27480 | 0.44 |
| <i>H. impetiginosus</i> | NKXS01007041.1 | 22489 | 0.44 |
| <i>H. impetiginosus</i> | NKXS01007090.1 | 18058 | 0.44 |
| <i>H. impetiginosus</i> | NKXS01007090.1 | 18066 | 0.44 |
| <i>H. impetiginosus</i> | NKXS01007090.1 | 18141 | 0.44 |
| <i>H. impetiginosus</i> | NKXS01007090.1 | 18224 | 0.44 |
| <i>H. impetiginosus</i> | NKXS01007124.1 | 1241  | 0.44 |
| <i>H. impetiginosus</i> | NKXS01007124.1 | 1271  | 0.44 |
| <i>H. impetiginosus</i> | NKXS01007135.1 | 10845 | 0.44 |
| <i>H. impetiginosus</i> | NKXS01007171.1 | 15632 | 0.44 |
| <i>H. impetiginosus</i> | NKXS01007171.1 | 15865 | 0.44 |
| <i>H. impetiginosus</i> | NKXS01007214.1 | 16949 | 0.44 |
| <i>H. impetiginosus</i> | NKXS01007277.1 | 6194  | 0.44 |
| <i>H. impetiginosus</i> | NKXS01007300.1 | 23061 | 0.44 |
| <i>H. impetiginosus</i> | NKXS01007689.1 | 10396 | 0.44 |
| <i>H. impetiginosus</i> | NKXS01007696.1 | 11526 | 0.44 |
| <i>H. impetiginosus</i> | NKXS01007696.1 | 11586 | 0.44 |
| <i>H. impetiginosus</i> | NKXS01007696.1 | 11592 | 0.44 |
| <i>H. impetiginosus</i> | NKXS01007812.1 | 4281  | 0.44 |
| <i>H. impetiginosus</i> | NKXS01007812.1 | 4394  | 0.44 |
| <i>H. impetiginosus</i> | NKXS01007844.1 | 14133 | 0.44 |
| <i>H. impetiginosus</i> | NKXS01007910.1 | 14301 | 0.44 |
| <i>H. impetiginosus</i> | NKXS01007910.1 | 15496 | 0.44 |
| <i>H. impetiginosus</i> | NKXS01007910.1 | 15560 | 0.44 |
| <i>H. impetiginosus</i> | NKXS01007980.1 | 1067  | 0.44 |
| <i>H. impetiginosus</i> | NKXS01008000.1 | 22816 | 0.44 |
| <i>H. impetiginosus</i> | NKXS01008318.1 | 10840 | 0.44 |
| <i>H. impetiginosus</i> | NKXS01008579.1 | 9708  | 0.44 |
| <i>H. impetiginosus</i> | NKXS01008628.1 | 12446 | 0.44 |
| <i>H. impetiginosus</i> | NKXS01008628.1 | 12549 | 0.44 |
| <i>H. impetiginosus</i> | NKXS01008801.1 | 12904 | 0.44 |
| <i>H. impetiginosus</i> | NKXS01008881.1 | 11299 | 0.44 |
| <i>H. impetiginosus</i> | NKXS01008881.1 | 11319 | 0.44 |

|                         |                |        |      |
|-------------------------|----------------|--------|------|
| <i>H. impetiginosus</i> | NKXS01008935.1 | 9633   | 0.44 |
| <i>H. impetiginosus</i> | NKXS01008935.1 | 9745   | 0.44 |
| <i>H. impetiginosus</i> | NKXS01009188.1 | 8982   | 0.44 |
| <i>H. impetiginosus</i> | NKXS01009211.1 | 1464   | 0.44 |
| <i>H. impetiginosus</i> | NKXS01009493.1 | 5064   | 0.44 |
| <i>H. impetiginosus</i> | NKXS01009659.1 | 3190   | 0.44 |
| <i>H. impetiginosus</i> | NKXS01010569.1 | 4634   | 0.44 |
| <i>H. impetiginosus</i> | NKXS01012469.1 | 427    | 0.44 |
| <i>H. impetiginosus</i> | NKXS01000006.1 | 375500 | 0.38 |
| <i>H. impetiginosus</i> | NKXS01000030.1 | 357807 | 0.38 |
| <i>H. impetiginosus</i> | NKXS01000087.1 | 14621  | 0.38 |
| <i>H. impetiginosus</i> | NKXS01000089.1 | 156140 | 0.38 |
| <i>H. impetiginosus</i> | NKXS01000091.1 | 103718 | 0.38 |
| <i>H. impetiginosus</i> | NKXS01000094.1 | 184706 | 0.38 |
| <i>H. impetiginosus</i> | NKXS01000094.1 | 184749 | 0.38 |
| <i>H. impetiginosus</i> | NKXS01000097.1 | 67670  | 0.38 |
| <i>H. impetiginosus</i> | NKXS01000109.1 | 80514  | 0.38 |
| <i>H. impetiginosus</i> | NKXS01000109.1 | 80647  | 0.38 |
| <i>H. impetiginosus</i> | NKXS01000109.1 | 80703  | 0.38 |
| <i>H. impetiginosus</i> | NKXS01000120.1 | 32054  | 0.38 |
| <i>H. impetiginosus</i> | NKXS01000123.1 | 156592 | 0.38 |
| <i>H. impetiginosus</i> | NKXS01000174.1 | 5101   | 0.38 |
| <i>H. impetiginosus</i> | NKXS01000175.1 | 58115  | 0.38 |
| <i>H. impetiginosus</i> | NKXS01000186.1 | 25696  | 0.38 |
| <i>H. impetiginosus</i> | NKXS01000278.1 | 104452 | 0.38 |
| <i>H. impetiginosus</i> | NKXS01000278.1 | 104524 | 0.38 |
| <i>H. impetiginosus</i> | NKXS01000278.1 | 104674 | 0.38 |
| <i>H. impetiginosus</i> | NKXS01000298.1 | 171662 | 0.38 |
| <i>H. impetiginosus</i> | NKXS01000344.1 | 70635  | 0.38 |
| <i>H. impetiginosus</i> | NKXS01000344.1 | 70863  | 0.38 |
| <i>H. impetiginosus</i> | NKXS01000383.1 | 100677 | 0.38 |
| <i>H. impetiginosus</i> | NKXS01000415.1 | 85370  | 0.38 |
| <i>H. impetiginosus</i> | NKXS01000442.1 | 62768  | 0.38 |
| <i>H. impetiginosus</i> | NKXS01000450.1 | 15193  | 0.38 |
| <i>H. impetiginosus</i> | NKXS01000450.1 | 15385  | 0.38 |
| <i>H. impetiginosus</i> | NKXS01000487.1 | 107166 | 0.38 |
| <i>H. impetiginosus</i> | NKXS01000546.1 | 29710  | 0.38 |
| <i>H. impetiginosus</i> | NKXS01000568.1 | 39700  | 0.38 |
| <i>H. impetiginosus</i> | NKXS01000568.1 | 117127 | 0.38 |
| <i>H. impetiginosus</i> | NKXS01000569.1 | 8558   | 0.38 |
| <i>H. impetiginosus</i> | NKXS01000569.1 | 8666   | 0.38 |
| <i>H. impetiginosus</i> | NKXS01000570.1 | 126472 | 0.38 |
| <i>H. impetiginosus</i> | NKXS01000582.1 | 68453  | 0.38 |
| <i>H. impetiginosus</i> | NKXS01000582.1 | 68681  | 0.38 |



|                         |                |        |      |
|-------------------------|----------------|--------|------|
| <i>H. impetiginosus</i> | NKXS01000582.1 | 68682  | 0.38 |
| <i>H. impetiginosus</i> | NKXS01000600.1 | 278752 | 0.38 |
| <i>H. impetiginosus</i> | NKXS01000602.1 | 150086 | 0.38 |
| <i>H. impetiginosus</i> | NKXS01000718.1 | 78029  | 0.38 |
| <i>H. impetiginosus</i> | NKXS01000733.1 | 90919  | 0.38 |
| <i>H. impetiginosus</i> | NKXS01000733.1 | 91004  | 0.38 |
| <i>H. impetiginosus</i> | NKXS01000733.1 | 91024  | 0.38 |
| <i>H. impetiginosus</i> | NKXS01000757.1 | 51014  | 0.38 |
| <i>H. impetiginosus</i> | NKXS01000852.1 | 102491 | 0.38 |
| <i>H. impetiginosus</i> | NKXS01000852.1 | 102503 | 0.38 |
| <i>H. impetiginosus</i> | NKXS01000852.1 | 102530 | 0.38 |
| <i>H. impetiginosus</i> | NKXS01000852.1 | 102572 | 0.38 |
| <i>H. impetiginosus</i> | NKXS01000852.1 | 102672 | 0.38 |
| <i>H. impetiginosus</i> | NKXS01000852.1 | 102697 | 0.38 |
| <i>H. impetiginosus</i> | NKXS01000852.1 | 102705 | 0.38 |
| <i>H. impetiginosus</i> | NKXS01000852.1 | 110479 | 0.38 |
| <i>H. impetiginosus</i> | NKXS01000905.1 | 102506 | 0.38 |
| <i>H. impetiginosus</i> | NKXS01000905.1 | 102674 | 0.38 |
| <i>H. impetiginosus</i> | NKXS01000905.1 | 141662 | 0.38 |
| <i>H. impetiginosus</i> | NKXS01000905.1 | 141667 | 0.38 |
| <i>H. impetiginosus</i> | NKXS01001004.1 | 68285  | 0.38 |
| <i>H. impetiginosus</i> | NKXS01001004.1 | 68483  | 0.38 |
| <i>H. impetiginosus</i> | NKXS01001034.1 | 137799 | 0.38 |
| <i>H. impetiginosus</i> | NKXS01001034.1 | 137804 | 0.38 |
| <i>H. impetiginosus</i> | NKXS01001085.1 | 109918 | 0.38 |
| <i>H. impetiginosus</i> | NKXS01001087.1 | 107137 | 0.38 |
| <i>H. impetiginosus</i> | NKXS01001187.1 | 91374  | 0.38 |
| <i>H. impetiginosus</i> | NKXS01001187.1 | 91381  | 0.38 |
| <i>H. impetiginosus</i> | NKXS01001193.1 | 1085   | 0.38 |
| <i>H. impetiginosus</i> | NKXS01001200.1 | 7538   | 0.38 |
| <i>H. impetiginosus</i> | NKXS01001211.1 | 24675  | 0.38 |
| <i>H. impetiginosus</i> | NKXS01001211.1 | 24778  | 0.38 |
| <i>H. impetiginosus</i> | NKXS01001211.1 | 24814  | 0.38 |
| <i>H. impetiginosus</i> | NKXS01001211.1 | 24828  | 0.38 |
| <i>H. impetiginosus</i> | NKXS01001211.1 | 24843  | 0.38 |
| <i>H. impetiginosus</i> | NKXS01001220.1 | 40568  | 0.38 |
| <i>H. impetiginosus</i> | NKXS01001220.1 | 40718  | 0.38 |
| <i>H. impetiginosus</i> | NKXS01001323.1 | 4917   | 0.38 |
| <i>H. impetiginosus</i> | NKXS01001325.1 | 168864 | 0.38 |
| <i>H. impetiginosus</i> | NKXS01001329.1 | 96279  | 0.38 |
| <i>H. impetiginosus</i> | NKXS01001366.1 | 33858  | 0.38 |
| <i>H. impetiginosus</i> | NKXS01001408.1 | 87198  | 0.38 |
| <i>H. impetiginosus</i> | NKXS01001415.1 | 11883  | 0.38 |
| <i>H. impetiginosus</i> | NKXS01001446.1 | 56199  | 0.38 |

|                         |                |        |      |
|-------------------------|----------------|--------|------|
| <i>H. impetiginosus</i> | NKXS01001446.1 | 56209  | 0.38 |
| <i>H. impetiginosus</i> | NKXS01001446.1 | 56276  | 0.38 |
| <i>H. impetiginosus</i> | NKXS01001446.1 | 56319  | 0.38 |
| <i>H. impetiginosus</i> | NKXS01001448.1 | 83902  | 0.38 |
| <i>H. impetiginosus</i> | NKXS01001448.1 | 84037  | 0.38 |
| <i>H. impetiginosus</i> | NKXS01001483.1 | 39670  | 0.38 |
| <i>H. impetiginosus</i> | NKXS01001503.1 | 77829  | 0.38 |
| <i>H. impetiginosus</i> | NKXS01001511.1 | 41435  | 0.38 |
| <i>H. impetiginosus</i> | NKXS01001511.1 | 41515  | 0.38 |
| <i>H. impetiginosus</i> | NKXS01001612.1 | 92347  | 0.38 |
| <i>H. impetiginosus</i> | NKXS01001612.1 | 92359  | 0.38 |
| <i>H. impetiginosus</i> | NKXS01001612.1 | 92416  | 0.38 |
| <i>H. impetiginosus</i> | NKXS01001612.1 | 92439  | 0.38 |
| <i>H. impetiginosus</i> | NKXS01001614.1 | 24960  | 0.38 |
| <i>H. impetiginosus</i> | NKXS01001701.1 | 62334  | 0.38 |
| <i>H. impetiginosus</i> | NKXS01001701.1 | 62350  | 0.38 |
| <i>H. impetiginosus</i> | NKXS01001701.1 | 62433  | 0.38 |
| <i>H. impetiginosus</i> | NKXS01001777.1 | 28793  | 0.38 |
| <i>H. impetiginosus</i> | NKXS01001777.1 | 28799  | 0.38 |
| <i>H. impetiginosus</i> | NKXS01001778.1 | 14893  | 0.38 |
| <i>H. impetiginosus</i> | NKXS01001796.1 | 98148  | 0.38 |
| <i>H. impetiginosus</i> | NKXS01001796.1 | 98369  | 0.38 |
| <i>H. impetiginosus</i> | NKXS01001831.1 | 44987  | 0.38 |
| <i>H. impetiginosus</i> | NKXS01001924.1 | 105036 | 0.38 |
| <i>H. impetiginosus</i> | NKXS01001938.1 | 20394  | 0.38 |
| <i>H. impetiginosus</i> | NKXS01001995.1 | 47312  | 0.38 |
| <i>H. impetiginosus</i> | NKXS01001995.1 | 47408  | 0.38 |
| <i>H. impetiginosus</i> | NKXS01002016.1 | 115403 | 0.38 |
| <i>H. impetiginosus</i> | NKXS01002016.1 | 115461 | 0.38 |
| <i>H. impetiginosus</i> | NKXS01002016.1 | 115496 | 0.38 |
| <i>H. impetiginosus</i> | NKXS01002016.1 | 115538 | 0.38 |
| <i>H. impetiginosus</i> | NKXS01002016.1 | 115545 | 0.38 |
| <i>H. impetiginosus</i> | NKXS01002016.1 | 115592 | 0.38 |
| <i>H. impetiginosus</i> | NKXS01002016.1 | 115619 | 0.38 |
| <i>H. impetiginosus</i> | NKXS01002126.1 | 81252  | 0.38 |
| <i>H. impetiginosus</i> | NKXS01002126.1 | 81318  | 0.38 |
| <i>H. impetiginosus</i> | NKXS01002133.1 | 33280  | 0.38 |
| <i>H. impetiginosus</i> | NKXS01002148.1 | 12324  | 0.38 |
| <i>H. impetiginosus</i> | NKXS01002149.1 | 49832  | 0.38 |
| <i>H. impetiginosus</i> | NKXS01002149.1 | 49937  | 0.38 |
| <i>H. impetiginosus</i> | NKXS01002149.1 | 49971  | 0.38 |
| <i>H. impetiginosus</i> | NKXS01002166.1 | 77250  | 0.38 |
| <i>H. impetiginosus</i> | NKXS01002184.1 | 93741  | 0.38 |
| <i>H. impetiginosus</i> | NKXS01002192.1 | 80649  | 0.38 |

|                         |                |        |      |
|-------------------------|----------------|--------|------|
| <i>H. impetiginosus</i> | NKXS01002327.1 | 37401  | 0.38 |
| <i>H. impetiginosus</i> | NKXS01002550.1 | 106998 | 0.38 |
| <i>H. impetiginosus</i> | NKXS01002626.1 | 31721  | 0.38 |
| <i>H. impetiginosus</i> | NKXS01002675.1 | 67050  | 0.38 |
| <i>H. impetiginosus</i> | NKXS01002675.1 | 67213  | 0.38 |
| <i>H. impetiginosus</i> | NKXS01002685.1 | 77249  | 0.38 |
| <i>H. impetiginosus</i> | NKXS01002687.1 | 15758  | 0.38 |
| <i>H. impetiginosus</i> | NKXS01002691.1 | 42785  | 0.38 |
| <i>H. impetiginosus</i> | NKXS01002730.1 | 26371  | 0.38 |
| <i>H. impetiginosus</i> | NKXS01002730.1 | 50400  | 0.38 |
| <i>H. impetiginosus</i> | NKXS01002747.1 | 39335  | 0.38 |
| <i>H. impetiginosus</i> | NKXS01002756.1 | 44766  | 0.38 |
| <i>H. impetiginosus</i> | NKXS01002762.1 | 629    | 0.38 |
| <i>H. impetiginosus</i> | NKXS01002805.1 | 97870  | 0.38 |
| <i>H. impetiginosus</i> | NKXS01002826.1 | 29122  | 0.38 |
| <i>H. impetiginosus</i> | NKXS01002944.1 | 1198   | 0.38 |
| <i>H. impetiginosus</i> | NKXS01002944.1 | 1328   | 0.38 |
| <i>H. impetiginosus</i> | NKXS01002944.1 | 1381   | 0.38 |
| <i>H. impetiginosus</i> | NKXS01002946.1 | 16866  | 0.38 |
| <i>H. impetiginosus</i> | NKXS01003013.1 | 106136 | 0.38 |
| <i>H. impetiginosus</i> | NKXS01003134.1 | 70960  | 0.38 |
| <i>H. impetiginosus</i> | NKXS01003219.1 | 59349  | 0.38 |
| <i>H. impetiginosus</i> | NKXS01003292.1 | 36729  | 0.38 |
| <i>H. impetiginosus</i> | NKXS01003292.1 | 36744  | 0.38 |
| <i>H. impetiginosus</i> | NKXS01003292.1 | 36854  | 0.38 |
| <i>H. impetiginosus</i> | NKXS01003292.1 | 36909  | 0.38 |
| <i>H. impetiginosus</i> | NKXS01003418.1 | 65267  | 0.38 |
| <i>H. impetiginosus</i> | NKXS01003418.1 | 65273  | 0.38 |
| <i>H. impetiginosus</i> | NKXS01003418.1 | 65293  | 0.38 |
| <i>H. impetiginosus</i> | NKXS01003418.1 | 65314  | 0.38 |
| <i>H. impetiginosus</i> | NKXS01003418.1 | 65374  | 0.38 |
| <i>H. impetiginosus</i> | NKXS01003418.1 | 65385  | 0.38 |
| <i>H. impetiginosus</i> | NKXS01003418.1 | 65420  | 0.38 |
| <i>H. impetiginosus</i> | NKXS01003418.1 | 65441  | 0.38 |
| <i>H. impetiginosus</i> | NKXS01003418.1 | 65504  | 0.38 |
| <i>H. impetiginosus</i> | NKXS01003505.1 | 1230   | 0.38 |
| <i>H. impetiginosus</i> | NKXS01003505.1 | 1248   | 0.38 |
| <i>H. impetiginosus</i> | NKXS01003516.1 | 1213   | 0.38 |
| <i>H. impetiginosus</i> | NKXS01003544.1 | 59756  | 0.38 |
| <i>H. impetiginosus</i> | NKXS01003544.1 | 59856  | 0.38 |
| <i>H. impetiginosus</i> | NKXS01003549.1 | 24197  | 0.38 |
| <i>H. impetiginosus</i> | NKXS01003564.1 | 3432   | 0.38 |
| <i>H. impetiginosus</i> | NKXS01003604.1 | 33670  | 0.38 |
| <i>H. impetiginosus</i> | NKXS01003646.1 | 74479  | 0.38 |

|                         |                |       |      |
|-------------------------|----------------|-------|------|
| <i>H. impetiginosus</i> | NKXS01003775.1 | 20409 | 0.38 |
| <i>H. impetiginosus</i> | NKXS01003861.1 | 69143 | 0.38 |
| <i>H. impetiginosus</i> | NKXS01003861.1 | 69192 | 0.38 |
| <i>H. impetiginosus</i> | NKXS01003861.1 | 69198 | 0.38 |
| <i>H. impetiginosus</i> | NKXS01003919.1 | 25941 | 0.38 |
| <i>H. impetiginosus</i> | NKXS01003925.1 | 28420 | 0.38 |
| <i>H. impetiginosus</i> | NKXS01003981.1 | 26654 | 0.38 |
| <i>H. impetiginosus</i> | NKXS01003982.1 | 17620 | 0.38 |
| <i>H. impetiginosus</i> | NKXS01003982.1 | 17742 | 0.38 |
| <i>H. impetiginosus</i> | NKXS01004218.1 | 23972 | 0.38 |
| <i>H. impetiginosus</i> | NKXS01004226.1 | 24581 | 0.38 |
| <i>H. impetiginosus</i> | NKXS01004226.1 | 24624 | 0.38 |
| <i>H. impetiginosus</i> | NKXS01004226.1 | 24628 | 0.38 |
| <i>H. impetiginosus</i> | NKXS01004235.1 | 60173 | 0.38 |
| <i>H. impetiginosus</i> | NKXS01004283.1 | 60548 | 0.38 |
| <i>H. impetiginosus</i> | NKXS01004420.1 | 24396 | 0.38 |
| <i>H. impetiginosus</i> | NKXS01004449.1 | 41540 | 0.38 |
| <i>H. impetiginosus</i> | NKXS01004449.1 | 41549 | 0.38 |
| <i>H. impetiginosus</i> | NKXS01004450.1 | 48553 | 0.38 |
| <i>H. impetiginosus</i> | NKXS01004489.1 | 18378 | 0.38 |
| <i>H. impetiginosus</i> | NKXS01004491.1 | 18282 | 0.38 |
| <i>H. impetiginosus</i> | NKXS01004491.1 | 40099 | 0.38 |
| <i>H. impetiginosus</i> | NKXS01004567.1 | 24377 | 0.38 |
| <i>H. impetiginosus</i> | NKXS01004567.1 | 24490 | 0.38 |
| <i>H. impetiginosus</i> | NKXS01004620.1 | 9928  | 0.38 |
| <i>H. impetiginosus</i> | NKXS01004820.1 | 14822 | 0.38 |
| <i>H. impetiginosus</i> | NKXS01004877.1 | 10812 | 0.38 |
| <i>H. impetiginosus</i> | NKXS01004944.1 | 44901 | 0.38 |
| <i>H. impetiginosus</i> | NKXS01005165.1 | 33476 | 0.38 |
| <i>H. impetiginosus</i> | NKXS01005264.1 | 1080  | 0.38 |
| <i>H. impetiginosus</i> | NKXS01005267.1 | 1248  | 0.38 |
| <i>H. impetiginosus</i> | NKXS01005413.1 | 36310 | 0.38 |
| <i>H. impetiginosus</i> | NKXS01005511.1 | 6568  | 0.38 |
| <i>H. impetiginosus</i> | NKXS01005511.1 | 6587  | 0.38 |
| <i>H. impetiginosus</i> | NKXS01005725.1 | 43256 | 0.38 |
| <i>H. impetiginosus</i> | NKXS01005810.1 | 54537 | 0.38 |
| <i>H. impetiginosus</i> | NKXS01005933.1 | 49780 | 0.38 |
| <i>H. impetiginosus</i> | NKXS01005981.1 | 15416 | 0.38 |
| <i>H. impetiginosus</i> | NKXS01005981.1 | 15508 | 0.38 |
| <i>H. impetiginosus</i> | NKXS01006017.1 | 6122  | 0.38 |
| <i>H. impetiginosus</i> | NKXS01006017.1 | 6182  | 0.38 |
| <i>H. impetiginosus</i> | NKXS01006020.1 | 2655  | 0.38 |
| <i>H. impetiginosus</i> | NKXS01006071.1 | 37960 | 0.38 |
| <i>H. impetiginosus</i> | NKXS01006095.1 | 48666 | 0.38 |

|                         |                |       |      |
|-------------------------|----------------|-------|------|
| <i>H. impetiginosus</i> | NKXS01006113.1 | 2736  | 0.38 |
| <i>H. impetiginosus</i> | NKXS01006201.1 | 20180 | 0.38 |
| <i>H. impetiginosus</i> | NKXS01006490.1 | 30365 | 0.38 |
| <i>H. impetiginosus</i> | NKXS01006639.1 | 42114 | 0.38 |
| <i>H. impetiginosus</i> | NKXS01006658.1 | 7484  | 0.38 |
| <i>H. impetiginosus</i> | NKXS01006658.1 | 7539  | 0.38 |
| <i>H. impetiginosus</i> | NKXS01006778.1 | 4812  | 0.38 |
| <i>H. impetiginosus</i> | NKXS01007055.1 | 11318 | 0.38 |
| <i>H. impetiginosus</i> | NKXS01007055.1 | 11333 | 0.38 |
| <i>H. impetiginosus</i> | NKXS01007131.1 | 20180 | 0.38 |
| <i>H. impetiginosus</i> | NKXS01007131.1 | 20192 | 0.38 |
| <i>H. impetiginosus</i> | NKXS01007131.1 | 20248 | 0.38 |
| <i>H. impetiginosus</i> | NKXS01007131.1 | 20259 | 0.38 |
| <i>H. impetiginosus</i> | NKXS01007131.1 | 20266 | 0.38 |
| <i>H. impetiginosus</i> | NKXS01007131.1 | 20356 | 0.38 |
| <i>H. impetiginosus</i> | NKXS01007131.1 | 20414 | 0.38 |
| <i>H. impetiginosus</i> | NKXS01007229.1 | 19390 | 0.38 |
| <i>H. impetiginosus</i> | NKXS01007229.1 | 19444 | 0.38 |
| <i>H. impetiginosus</i> | NKXS01007252.1 | 2538  | 0.38 |
| <i>H. impetiginosus</i> | NKXS01007696.1 | 11498 | 0.38 |
| <i>H. impetiginosus</i> | NKXS01007704.1 | 14922 | 0.38 |
| <i>H. impetiginosus</i> | NKXS01007844.1 | 14122 | 0.38 |
| <i>H. impetiginosus</i> | NKXS01007917.1 | 9748  | 0.38 |
| <i>H. impetiginosus</i> | NKXS01007933.1 | 20266 | 0.38 |
| <i>H. impetiginosus</i> | NKXS01008142.1 | 9618  | 0.38 |
| <i>H. impetiginosus</i> | NKXS01008188.1 | 14470 | 0.38 |
| <i>H. impetiginosus</i> | NKXS01008235.1 | 23556 | 0.38 |
| <i>H. impetiginosus</i> | NKXS01008318.1 | 10872 | 0.38 |
| <i>H. impetiginosus</i> | NKXS01008364.1 | 7322  | 0.38 |
| <i>H. impetiginosus</i> | NKXS01008422.1 | 14176 | 0.38 |
| <i>H. impetiginosus</i> | NKXS01008874.1 | 3167  | 0.38 |
| <i>H. impetiginosus</i> | NKXS01008924.1 | 300   | 0.38 |
| <i>H. impetiginosus</i> | NKXS01009072.1 | 7565  | 0.38 |
| <i>H. impetiginosus</i> | NKXS01009215.1 | 11773 | 0.38 |
| <i>H. impetiginosus</i> | NKXS01009215.1 | 11832 | 0.38 |
| <i>H. impetiginosus</i> | NKXS01009215.1 | 11842 | 0.38 |
| <i>H. impetiginosus</i> | NKXS01009215.1 | 11872 | 0.38 |
| <i>H. impetiginosus</i> | NKXS01009290.1 | 12841 | 0.38 |
| <i>H. impetiginosus</i> | NKXS01009290.1 | 12847 | 0.38 |
| <i>H. impetiginosus</i> | NKXS01009290.1 | 12888 | 0.38 |
| <i>H. impetiginosus</i> | NKXS01009290.1 | 12907 | 0.38 |
| <i>H. impetiginosus</i> | NKXS01009399.1 | 7583  | 0.38 |
| <i>H. impetiginosus</i> | NKXS01009659.1 | 3202  | 0.38 |
| <i>H. impetiginosus</i> | NKXS01010261.1 | 6439  | 0.38 |

|                         |                |        |      |
|-------------------------|----------------|--------|------|
| <i>H. impetiginosus</i> | NKXS01010452.1 | 5294   | 0.38 |
| <i>H. impetiginosus</i> | NKXS01010452.1 | 5325   | 0.38 |
| <i>H. impetiginosus</i> | NKXS01012469.1 | 385    | 0.38 |
| <i>H. impetiginosus</i> | NKXS01012469.1 | 420    | 0.38 |
| <i>H. impetiginosus</i> | NKXS01000023.1 | 461515 | 0.31 |
| <i>H. impetiginosus</i> | NKXS01000055.1 | 61521  | 0.31 |
| <i>H. impetiginosus</i> | NKXS01000080.1 | 5917   | 0.31 |
| <i>H. impetiginosus</i> | NKXS01000080.1 | 5922   | 0.31 |
| <i>H. impetiginosus</i> | NKXS01000080.1 | 6062   | 0.31 |
| <i>H. impetiginosus</i> | NKXS01000087.1 | 14622  | 0.31 |
| <i>H. impetiginosus</i> | NKXS01000088.1 | 216406 | 0.31 |
| <i>H. impetiginosus</i> | NKXS01000090.1 | 83703  | 0.31 |
| <i>H. impetiginosus</i> | NKXS01000090.1 | 83738  | 0.31 |
| <i>H. impetiginosus</i> | NKXS01000091.1 | 103736 | 0.31 |
| <i>H. impetiginosus</i> | NKXS01000128.1 | 43819  | 0.31 |
| <i>H. impetiginosus</i> | NKXS01000147.1 | 91691  | 0.31 |
| <i>H. impetiginosus</i> | NKXS01000149.1 | 95512  | 0.31 |
| <i>H. impetiginosus</i> | NKXS01000149.1 | 95613  | 0.31 |
| <i>H. impetiginosus</i> | NKXS01000172.1 | 90710  | 0.31 |
| <i>H. impetiginosus</i> | NKXS01000172.1 | 90765  | 0.31 |
| <i>H. impetiginosus</i> | NKXS01000186.1 | 275056 | 0.31 |
| <i>H. impetiginosus</i> | NKXS01000204.1 | 92778  | 0.31 |
| <i>H. impetiginosus</i> | NKXS01000204.1 | 92889  | 0.31 |
| <i>H. impetiginosus</i> | NKXS01000230.1 | 85864  | 0.31 |
| <i>H. impetiginosus</i> | NKXS01000249.1 | 102060 | 0.31 |
| <i>H. impetiginosus</i> | NKXS01000249.1 | 102274 | 0.31 |
| <i>H. impetiginosus</i> | NKXS01000278.1 | 104587 | 0.31 |
| <i>H. impetiginosus</i> | NKXS01000410.1 | 47316  | 0.31 |
| <i>H. impetiginosus</i> | NKXS01000421.1 | 202075 | 0.31 |
| <i>H. impetiginosus</i> | NKXS01000442.1 | 62641  | 0.31 |
| <i>H. impetiginosus</i> | NKXS01000442.1 | 62705  | 0.31 |
| <i>H. impetiginosus</i> | NKXS01000442.1 | 62756  | 0.31 |
| <i>H. impetiginosus</i> | NKXS01000455.1 | 123777 | 0.31 |
| <i>H. impetiginosus</i> | NKXS01000455.1 | 123794 | 0.31 |
| <i>H. impetiginosus</i> | NKXS01000483.1 | 2657   | 0.31 |
| <i>H. impetiginosus</i> | NKXS01000483.1 | 2732   | 0.31 |
| <i>H. impetiginosus</i> | NKXS01000493.1 | 10165  | 0.31 |
| <i>H. impetiginosus</i> | NKXS01000581.1 | 114024 | 0.31 |
| <i>H. impetiginosus</i> | NKXS01000581.1 | 114091 | 0.31 |
| <i>H. impetiginosus</i> | NKXS01000581.1 | 128835 | 0.31 |
| <i>H. impetiginosus</i> | NKXS01000587.1 | 103010 | 0.31 |
| <i>H. impetiginosus</i> | NKXS01000600.1 | 137622 | 0.31 |
| <i>H. impetiginosus</i> | NKXS01000654.1 | 44642  | 0.31 |
| <i>H. impetiginosus</i> | NKXS01000662.1 | 95949  | 0.31 |

|                         |                |        |      |
|-------------------------|----------------|--------|------|
| <i>H. impetiginosus</i> | NKXS01000686.1 | 16917  | 0.31 |
| <i>H. impetiginosus</i> | NKXS01000686.1 | 145362 | 0.31 |
| <i>H. impetiginosus</i> | NKXS01000686.1 | 145391 | 0.31 |
| <i>H. impetiginosus</i> | NKXS01000686.1 | 145418 | 0.31 |
| <i>H. impetiginosus</i> | NKXS01000686.1 | 145419 | 0.31 |
| <i>H. impetiginosus</i> | NKXS01000686.1 | 145470 | 0.31 |
| <i>H. impetiginosus</i> | NKXS01000686.1 | 145499 | 0.31 |
| <i>H. impetiginosus</i> | NKXS01000686.1 | 145565 | 0.31 |
| <i>H. impetiginosus</i> | NKXS01000686.1 | 145573 | 0.31 |
| <i>H. impetiginosus</i> | NKXS01000701.1 | 16197  | 0.31 |
| <i>H. impetiginosus</i> | NKXS01000704.1 | 47255  | 0.31 |
| <i>H. impetiginosus</i> | NKXS01000704.1 | 47271  | 0.31 |
| <i>H. impetiginosus</i> | NKXS01000741.1 | 77627  | 0.31 |
| <i>H. impetiginosus</i> | NKXS01000741.1 | 77653  | 0.31 |
| <i>H. impetiginosus</i> | NKXS01000844.1 | 50902  | 0.31 |
| <i>H. impetiginosus</i> | NKXS01000852.1 | 102584 | 0.31 |
| <i>H. impetiginosus</i> | NKXS01000965.1 | 113928 | 0.31 |
| <i>H. impetiginosus</i> | NKXS01000965.1 | 114137 | 0.31 |
| <i>H. impetiginosus</i> | NKXS01000987.1 | 11453  | 0.31 |
| <i>H. impetiginosus</i> | NKXS01001004.1 | 68349  | 0.31 |
| <i>H. impetiginosus</i> | NKXS01001074.1 | 357    | 0.31 |
| <i>H. impetiginosus</i> | NKXS01001085.1 | 39316  | 0.31 |
| <i>H. impetiginosus</i> | NKXS01001085.1 | 72095  | 0.31 |
| <i>H. impetiginosus</i> | NKXS01001087.1 | 107052 | 0.31 |
| <i>H. impetiginosus</i> | NKXS01001087.1 | 107074 | 0.31 |
| <i>H. impetiginosus</i> | NKXS01001087.1 | 107104 | 0.31 |
| <i>H. impetiginosus</i> | NKXS01001087.1 | 107146 | 0.31 |
| <i>H. impetiginosus</i> | NKXS01001087.1 | 107174 | 0.31 |
| <i>H. impetiginosus</i> | NKXS01001087.1 | 107183 | 0.31 |
| <i>H. impetiginosus</i> | NKXS01001087.1 | 107195 | 0.31 |
| <i>H. impetiginosus</i> | NKXS01001144.1 | 2616   | 0.31 |
| <i>H. impetiginosus</i> | NKXS01001150.1 | 121162 | 0.31 |
| <i>H. impetiginosus</i> | NKXS01001189.1 | 226815 | 0.31 |
| <i>H. impetiginosus</i> | NKXS01001189.1 | 226919 | 0.31 |
| <i>H. impetiginosus</i> | NKXS01001248.1 | 89188  | 0.31 |
| <i>H. impetiginosus</i> | NKXS01001308.1 | 29780  | 0.31 |
| <i>H. impetiginosus</i> | NKXS01001329.1 | 96274  | 0.31 |
| <i>H. impetiginosus</i> | NKXS01001329.1 | 96345  | 0.31 |
| <i>H. impetiginosus</i> | NKXS01001329.1 | 96360  | 0.31 |
| <i>H. impetiginosus</i> | NKXS01001342.1 | 47853  | 0.31 |
| <i>H. impetiginosus</i> | NKXS01001378.1 | 64848  | 0.31 |
| <i>H. impetiginosus</i> | NKXS01001435.1 | 40147  | 0.31 |
| <i>H. impetiginosus</i> | NKXS01001435.1 | 40171  | 0.31 |
| <i>H. impetiginosus</i> | NKXS01001457.1 | 19906  | 0.31 |

|                         |                |        |      |
|-------------------------|----------------|--------|------|
| <i>H. impetiginosus</i> | NKXS01001483.1 | 39716  | 0.31 |
| <i>H. impetiginosus</i> | NKXS01001495.1 | 75753  | 0.31 |
| <i>H. impetiginosus</i> | NKXS01001511.1 | 41449  | 0.31 |
| <i>H. impetiginosus</i> | NKXS01001511.1 | 41569  | 0.31 |
| <i>H. impetiginosus</i> | NKXS01001525.1 | 57108  | 0.31 |
| <i>H. impetiginosus</i> | NKXS01001525.1 | 57178  | 0.31 |
| <i>H. impetiginosus</i> | NKXS01001597.1 | 30761  | 0.31 |
| <i>H. impetiginosus</i> | NKXS01001613.1 | 79746  | 0.31 |
| <i>H. impetiginosus</i> | NKXS01001613.1 | 79965  | 0.31 |
| <i>H. impetiginosus</i> | NKXS01001691.1 | 67388  | 0.31 |
| <i>H. impetiginosus</i> | NKXS01001701.1 | 62456  | 0.31 |
| <i>H. impetiginosus</i> | NKXS01001776.1 | 14800  | 0.31 |
| <i>H. impetiginosus</i> | NKXS01001777.1 | 28648  | 0.31 |
| <i>H. impetiginosus</i> | NKXS01001778.1 | 42885  | 0.31 |
| <i>H. impetiginosus</i> | NKXS01001836.1 | 86870  | 0.31 |
| <i>H. impetiginosus</i> | NKXS01002166.1 | 77267  | 0.31 |
| <i>H. impetiginosus</i> | NKXS01002166.1 | 77273  | 0.31 |
| <i>H. impetiginosus</i> | NKXS01002196.1 | 20216  | 0.31 |
| <i>H. impetiginosus</i> | NKXS01002196.1 | 20273  | 0.31 |
| <i>H. impetiginosus</i> | NKXS01002196.1 | 20393  | 0.31 |
| <i>H. impetiginosus</i> | NKXS01002346.1 | 139508 | 0.31 |
| <i>H. impetiginosus</i> | NKXS01002392.1 | 76370  | 0.31 |
| <i>H. impetiginosus</i> | NKXS01002396.1 | 10275  | 0.31 |
| <i>H. impetiginosus</i> | NKXS01002411.1 | 129813 | 0.31 |
| <i>H. impetiginosus</i> | NKXS01002450.1 | 48288  | 0.31 |
| <i>H. impetiginosus</i> | NKXS01002504.1 | 20351  | 0.31 |
| <i>H. impetiginosus</i> | NKXS01002519.1 | 36282  | 0.31 |
| <i>H. impetiginosus</i> | NKXS01002628.1 | 3882   | 0.31 |
| <i>H. impetiginosus</i> | NKXS01002628.1 | 3912   | 0.31 |
| <i>H. impetiginosus</i> | NKXS01002646.1 | 40871  | 0.31 |
| <i>H. impetiginosus</i> | NKXS01002730.1 | 26414  | 0.31 |
| <i>H. impetiginosus</i> | NKXS01002730.1 | 26478  | 0.31 |
| <i>H. impetiginosus</i> | NKXS01002730.1 | 26613  | 0.31 |
| <i>H. impetiginosus</i> | NKXS01002742.1 | 444    | 0.31 |
| <i>H. impetiginosus</i> | NKXS01002946.1 | 16894  | 0.31 |
| <i>H. impetiginosus</i> | NKXS01002955.1 | 69059  | 0.31 |
| <i>H. impetiginosus</i> | NKXS01003056.1 | 67318  | 0.31 |
| <i>H. impetiginosus</i> | NKXS01003142.1 | 79435  | 0.31 |
| <i>H. impetiginosus</i> | NKXS01003169.1 | 5698   | 0.31 |
| <i>H. impetiginosus</i> | NKXS01003269.1 | 69662  | 0.31 |
| <i>H. impetiginosus</i> | NKXS01003269.1 | 69731  | 0.31 |
| <i>H. impetiginosus</i> | NKXS01003292.1 | 36728  | 0.31 |
| <i>H. impetiginosus</i> | NKXS01003336.1 | 12164  | 0.31 |
| <i>H. impetiginosus</i> | NKXS01003476.1 | 32427  | 0.31 |



|                         |                |       |      |
|-------------------------|----------------|-------|------|
| <i>H. impetiginosus</i> | NKXS01003476.1 | 32445 | 0.31 |
| <i>H. impetiginosus</i> | NKXS01003476.1 | 32502 | 0.31 |
| <i>H. impetiginosus</i> | NKXS01003529.1 | 17072 | 0.31 |
| <i>H. impetiginosus</i> | NKXS01003599.1 | 2621  | 0.31 |
| <i>H. impetiginosus</i> | NKXS01003628.1 | 37398 | 0.31 |
| <i>H. impetiginosus</i> | NKXS01003667.1 | 38552 | 0.31 |
| <i>H. impetiginosus</i> | NKXS01003667.1 | 38755 | 0.31 |
| <i>H. impetiginosus</i> | NKXS01003735.1 | 8646  | 0.31 |
| <i>H. impetiginosus</i> | NKXS01003735.1 | 8685  | 0.31 |
| <i>H. impetiginosus</i> | NKXS01003735.1 | 8848  | 0.31 |
| <i>H. impetiginosus</i> | NKXS01003787.1 | 6155  | 0.31 |
| <i>H. impetiginosus</i> | NKXS01003821.1 | 81155 | 0.31 |
| <i>H. impetiginosus</i> | NKXS01003837.1 | 65495 | 0.31 |
| <i>H. impetiginosus</i> | NKXS01003845.1 | 49347 | 0.31 |
| <i>H. impetiginosus</i> | NKXS01003919.1 | 25789 | 0.31 |
| <i>H. impetiginosus</i> | NKXS01003972.1 | 46665 | 0.31 |
| <i>H. impetiginosus</i> | NKXS01003978.1 | 39096 | 0.31 |
| <i>H. impetiginosus</i> | NKXS01003982.1 | 17722 | 0.31 |
| <i>H. impetiginosus</i> | NKXS01004137.1 | 28926 | 0.31 |
| <i>H. impetiginosus</i> | NKXS01004137.1 | 64145 | 0.31 |
| <i>H. impetiginosus</i> | NKXS01004422.1 | 7557  | 0.31 |
| <i>H. impetiginosus</i> | NKXS01004448.1 | 16719 | 0.31 |
| <i>H. impetiginosus</i> | NKXS01004449.1 | 72915 | 0.31 |
| <i>H. impetiginosus</i> | NKXS01004473.1 | 7081  | 0.31 |
| <i>H. impetiginosus</i> | NKXS01004474.1 | 29303 | 0.31 |
| <i>H. impetiginosus</i> | NKXS01004475.1 | 3352  | 0.31 |
| <i>H. impetiginosus</i> | NKXS01004543.1 | 43910 | 0.31 |
| <i>H. impetiginosus</i> | NKXS01004567.1 | 24389 | 0.31 |
| <i>H. impetiginosus</i> | NKXS01004567.1 | 24555 | 0.31 |
| <i>H. impetiginosus</i> | NKXS01004567.1 | 24558 | 0.31 |
| <i>H. impetiginosus</i> | NKXS01004803.1 | 22819 | 0.31 |
| <i>H. impetiginosus</i> | NKXS01004913.1 | 56763 | 0.31 |
| <i>H. impetiginosus</i> | NKXS01004914.1 | 53291 | 0.31 |
| <i>H. impetiginosus</i> | NKXS01005050.1 | 54710 | 0.31 |
| <i>H. impetiginosus</i> | NKXS01005322.1 | 16196 | 0.31 |
| <i>H. impetiginosus</i> | NKXS01005376.1 | 31978 | 0.31 |
| <i>H. impetiginosus</i> | NKXS01005430.1 | 8768  | 0.31 |
| <i>H. impetiginosus</i> | NKXS01005677.1 | 12817 | 0.31 |
| <i>H. impetiginosus</i> | NKXS01005677.1 | 12892 | 0.31 |
| <i>H. impetiginosus</i> | NKXS01005690.1 | 6523  | 0.31 |
| <i>H. impetiginosus</i> | NKXS01005698.1 | 37748 | 0.31 |
| <i>H. impetiginosus</i> | NKXS01005789.1 | 10630 | 0.31 |
| <i>H. impetiginosus</i> | NKXS01005810.1 | 54444 | 0.31 |
| <i>H. impetiginosus</i> | NKXS01005810.1 | 54502 | 0.31 |

|                         |                |       |      |
|-------------------------|----------------|-------|------|
| <i>H. impetiginosus</i> | NKXS01005810.1 | 54547 | 0.31 |
| <i>H. impetiginosus</i> | NKXS01005810.1 | 54557 | 0.31 |
| <i>H. impetiginosus</i> | NKXS01005810.1 | 54563 | 0.31 |
| <i>H. impetiginosus</i> | NKXS01005810.1 | 54577 | 0.31 |
| <i>H. impetiginosus</i> | NKXS01005810.1 | 54667 | 0.31 |
| <i>H. impetiginosus</i> | NKXS01005810.1 | 54669 | 0.31 |
| <i>H. impetiginosus</i> | NKXS01005815.1 | 26634 | 0.31 |
| <i>H. impetiginosus</i> | NKXS01005855.1 | 37050 | 0.31 |
| <i>H. impetiginosus</i> | NKXS01005933.1 | 49709 | 0.31 |
| <i>H. impetiginosus</i> | NKXS01005969.1 | 11227 | 0.31 |
| <i>H. impetiginosus</i> | NKXS01005974.1 | 16799 | 0.31 |
| <i>H. impetiginosus</i> | NKXS01005981.1 | 15512 | 0.31 |
| <i>H. impetiginosus</i> | NKXS01006155.1 | 29094 | 0.31 |
| <i>H. impetiginosus</i> | NKXS01006201.1 | 20251 | 0.31 |
| <i>H. impetiginosus</i> | NKXS01006286.1 | 28221 | 0.31 |
| <i>H. impetiginosus</i> | NKXS01006286.1 | 28234 | 0.31 |
| <i>H. impetiginosus</i> | NKXS01006318.1 | 16556 | 0.31 |
| <i>H. impetiginosus</i> | NKXS01006391.1 | 133   | 0.31 |
| <i>H. impetiginosus</i> | NKXS01006391.1 | 142   | 0.31 |
| <i>H. impetiginosus</i> | NKXS01006395.1 | 14394 | 0.31 |
| <i>H. impetiginosus</i> | NKXS01006438.1 | 29488 | 0.31 |
| <i>H. impetiginosus</i> | NKXS01006737.1 | 6918  | 0.31 |
| <i>H. impetiginosus</i> | NKXS01006751.1 | 23681 | 0.31 |
| <i>H. impetiginosus</i> | NKXS01006752.1 | 5614  | 0.31 |
| <i>H. impetiginosus</i> | NKXS01006752.1 | 5631  | 0.31 |
| <i>H. impetiginosus</i> | NKXS01006999.1 | 12690 | 0.31 |
| <i>H. impetiginosus</i> | NKXS01007090.1 | 18085 | 0.31 |
| <i>H. impetiginosus</i> | NKXS01007218.1 | 10190 | 0.31 |
| <i>H. impetiginosus</i> | NKXS01007300.1 | 22884 | 0.31 |
| <i>H. impetiginosus</i> | NKXS01007300.1 | 22960 | 0.31 |
| <i>H. impetiginosus</i> | NKXS01007395.1 | 16383 | 0.31 |
| <i>H. impetiginosus</i> | NKXS01007467.1 | 22477 | 0.31 |
| <i>H. impetiginosus</i> | NKXS01007685.1 | 10153 | 0.31 |
| <i>H. impetiginosus</i> | NKXS01007685.1 | 10156 | 0.31 |
| <i>H. impetiginosus</i> | NKXS01007685.1 | 10220 | 0.31 |
| <i>H. impetiginosus</i> | NKXS01007685.1 | 10227 | 0.31 |
| <i>H. impetiginosus</i> | NKXS01007797.1 | 24509 | 0.31 |
| <i>H. impetiginosus</i> | NKXS01007910.1 | 15579 | 0.31 |
| <i>H. impetiginosus</i> | NKXS01007910.1 | 15585 | 0.31 |
| <i>H. impetiginosus</i> | NKXS01008129.1 | 10434 | 0.31 |
| <i>H. impetiginosus</i> | NKXS01008881.1 | 11339 | 0.31 |
| <i>H. impetiginosus</i> | NKXS01009062.1 | 28566 | 0.31 |
| <i>H. impetiginosus</i> | NKXS01009062.1 | 28599 | 0.31 |
| <i>H. impetiginosus</i> | NKXS01009062.1 | 28626 | 0.31 |

|                         |                |        |      |
|-------------------------|----------------|--------|------|
| <i>H. impetiginosus</i> | NKXS01009062.1 | 28663  | 0.31 |
| <i>H. impetiginosus</i> | NKXS01009093.1 | 4255   | 0.31 |
| <i>H. impetiginosus</i> | NKXS01009193.1 | 926    | 0.31 |
| <i>H. impetiginosus</i> | NKXS01009215.1 | 11764  | 0.31 |
| <i>H. impetiginosus</i> | NKXS01009215.1 | 11830  | 0.31 |
| <i>H. impetiginosus</i> | NKXS01009215.1 | 11833  | 0.31 |
| <i>H. impetiginosus</i> | NKXS01009399.1 | 7653   | 0.31 |
| <i>H. impetiginosus</i> | NKXS01009757.1 | 2074   | 0.31 |
| <i>H. impetiginosus</i> | NKXS01009757.1 | 2176   | 0.31 |
| <i>H. impetiginosus</i> | NKXS01009757.1 | 2178   | 0.31 |
| <i>H. impetiginosus</i> | NKXS01000021.1 | 60826  | 0.25 |
| <i>H. impetiginosus</i> | NKXS01000030.1 | 357894 | 0.25 |
| <i>H. impetiginosus</i> | NKXS01000037.1 | 58417  | 0.25 |
| <i>H. impetiginosus</i> | NKXS01000037.1 | 58449  | 0.25 |
| <i>H. impetiginosus</i> | NKXS01000089.1 | 156145 | 0.25 |
| <i>H. impetiginosus</i> | NKXS01000090.1 | 83700  | 0.25 |
| <i>H. impetiginosus</i> | NKXS01000094.1 | 184734 | 0.25 |
| <i>H. impetiginosus</i> | NKXS01000118.1 | 57374  | 0.25 |
| <i>H. impetiginosus</i> | NKXS01000132.1 | 140455 | 0.25 |
| <i>H. impetiginosus</i> | NKXS01000172.1 | 90689  | 0.25 |
| <i>H. impetiginosus</i> | NKXS01000176.1 | 102053 | 0.25 |
| <i>H. impetiginosus</i> | NKXS01000177.1 | 23429  | 0.25 |
| <i>H. impetiginosus</i> | NKXS01000194.1 | 56416  | 0.25 |
| <i>H. impetiginosus</i> | NKXS01000217.1 | 65205  | 0.25 |
| <i>H. impetiginosus</i> | NKXS01000218.1 | 110238 | 0.25 |
| <i>H. impetiginosus</i> | NKXS01000227.1 | 140417 | 0.25 |
| <i>H. impetiginosus</i> | NKXS01000269.1 | 50099  | 0.25 |
| <i>H. impetiginosus</i> | NKXS01000269.1 | 50171  | 0.25 |
| <i>H. impetiginosus</i> | NKXS01000298.1 | 171768 | 0.25 |
| <i>H. impetiginosus</i> | NKXS01000325.1 | 8697   | 0.25 |
| <i>H. impetiginosus</i> | NKXS01000353.1 | 159137 | 0.25 |
| <i>H. impetiginosus</i> | NKXS01000397.1 | 256    | 0.25 |
| <i>H. impetiginosus</i> | NKXS01000397.1 | 274    | 0.25 |
| <i>H. impetiginosus</i> | NKXS01000410.1 | 47327  | 0.25 |
| <i>H. impetiginosus</i> | NKXS01000450.1 | 15347  | 0.25 |
| <i>H. impetiginosus</i> | NKXS01000450.1 | 15366  | 0.25 |
| <i>H. impetiginosus</i> | NKXS01000523.1 | 123015 | 0.25 |
| <i>H. impetiginosus</i> | NKXS01000562.1 | 56672  | 0.25 |
| <i>H. impetiginosus</i> | NKXS01000649.1 | 86725  | 0.25 |
| <i>H. impetiginosus</i> | NKXS01000649.1 | 86776  | 0.25 |
| <i>H. impetiginosus</i> | NKXS01000653.1 | 1060   | 0.25 |
| <i>H. impetiginosus</i> | NKXS01000775.1 | 123257 | 0.25 |
| <i>H. impetiginosus</i> | NKXS01000852.1 | 102554 | 0.25 |
| <i>H. impetiginosus</i> | NKXS01000852.1 | 102599 | 0.25 |

|                         |                |        |      |
|-------------------------|----------------|--------|------|
| <i>H. impetiginosus</i> | NKXS01000852.1 | 110338 | 0.25 |
| <i>H. impetiginosus</i> | NKXS01000867.1 | 93403  | 0.25 |
| <i>H. impetiginosus</i> | NKXS01000867.1 | 95892  | 0.25 |
| <i>H. impetiginosus</i> | NKXS01000893.1 | 75741  | 0.25 |
| <i>H. impetiginosus</i> | NKXS01000919.1 | 35056  | 0.25 |
| <i>H. impetiginosus</i> | NKXS01000952.1 | 53562  | 0.25 |
| <i>H. impetiginosus</i> | NKXS01000956.1 | 9595   | 0.25 |
| <i>H. impetiginosus</i> | NKXS01000987.1 | 11313  | 0.25 |
| <i>H. impetiginosus</i> | NKXS01001059.1 | 139689 | 0.25 |
| <i>H. impetiginosus</i> | NKXS01001108.1 | 29222  | 0.25 |
| <i>H. impetiginosus</i> | NKXS01001270.1 | 133236 | 0.25 |
| <i>H. impetiginosus</i> | NKXS01001274.1 | 48539  | 0.25 |
| <i>H. impetiginosus</i> | NKXS01001289.1 | 12701  | 0.25 |
| <i>H. impetiginosus</i> | NKXS01001306.1 | 61360  | 0.25 |
| <i>H. impetiginosus</i> | NKXS01001418.1 | 48373  | 0.25 |
| <i>H. impetiginosus</i> | NKXS01001422.1 | 37971  | 0.25 |
| <i>H. impetiginosus</i> | NKXS01001435.1 | 40286  | 0.25 |
| <i>H. impetiginosus</i> | NKXS01001435.1 | 40292  | 0.25 |
| <i>H. impetiginosus</i> | NKXS01001442.1 | 40150  | 0.25 |
| <i>H. impetiginosus</i> | NKXS01001448.1 | 84031  | 0.25 |
| <i>H. impetiginosus</i> | NKXS01001466.1 | 147704 | 0.25 |
| <i>H. impetiginosus</i> | NKXS01001466.1 | 147707 | 0.25 |
| <i>H. impetiginosus</i> | NKXS01001466.1 | 147785 | 0.25 |
| <i>H. impetiginosus</i> | NKXS01001505.1 | 84020  | 0.25 |
| <i>H. impetiginosus</i> | NKXS01001511.1 | 41475  | 0.25 |
| <i>H. impetiginosus</i> | NKXS01001525.1 | 56965  | 0.25 |
| <i>H. impetiginosus</i> | NKXS01001525.1 | 57085  | 0.25 |
| <i>H. impetiginosus</i> | NKXS01001534.1 | 11129  | 0.25 |
| <i>H. impetiginosus</i> | NKXS01001585.1 | 20018  | 0.25 |
| <i>H. impetiginosus</i> | NKXS01001612.1 | 92394  | 0.25 |
| <i>H. impetiginosus</i> | NKXS01001896.1 | 19595  | 0.25 |
| <i>H. impetiginosus</i> | NKXS01001908.1 | 34945  | 0.25 |
| <i>H. impetiginosus</i> | NKXS01001920.1 | 37695  | 0.25 |
| <i>H. impetiginosus</i> | NKXS01002068.1 | 35595  | 0.25 |
| <i>H. impetiginosus</i> | NKXS01002122.1 | 125013 | 0.25 |
| <i>H. impetiginosus</i> | NKXS01002166.1 | 77198  | 0.25 |
| <i>H. impetiginosus</i> | NKXS01002170.1 | 26516  | 0.25 |
| <i>H. impetiginosus</i> | NKXS01002182.1 | 1880   | 0.25 |
| <i>H. impetiginosus</i> | NKXS01002182.1 | 1942   | 0.25 |
| <i>H. impetiginosus</i> | NKXS01002343.1 | 2373   | 0.25 |
| <i>H. impetiginosus</i> | NKXS01002394.1 | 46234  | 0.25 |
| <i>H. impetiginosus</i> | NKXS01002394.1 | 46308  | 0.25 |
| <i>H. impetiginosus</i> | NKXS01002472.1 | 86186  | 0.25 |
| <i>H. impetiginosus</i> | NKXS01002543.1 | 37358  | 0.25 |

|                         |                |        |      |
|-------------------------|----------------|--------|------|
| <i>H. impetiginosus</i> | NKXS01002577.1 | 342    | 0.25 |
| <i>H. impetiginosus</i> | NKXS01002577.1 | 355    | 0.25 |
| <i>H. impetiginosus</i> | NKXS01002623.1 | 13538  | 0.25 |
| <i>H. impetiginosus</i> | NKXS01002646.1 | 40911  | 0.25 |
| <i>H. impetiginosus</i> | NKXS01002646.1 | 40955  | 0.25 |
| <i>H. impetiginosus</i> | NKXS01002646.1 | 40958  | 0.25 |
| <i>H. impetiginosus</i> | NKXS01002646.1 | 40967  | 0.25 |
| <i>H. impetiginosus</i> | NKXS01002653.1 | 12737  | 0.25 |
| <i>H. impetiginosus</i> | NKXS01002685.1 | 77287  | 0.25 |
| <i>H. impetiginosus</i> | NKXS01002685.1 | 77313  | 0.25 |
| <i>H. impetiginosus</i> | NKXS01002685.1 | 77354  | 0.25 |
| <i>H. impetiginosus</i> | NKXS01002685.1 | 77416  | 0.25 |
| <i>H. impetiginosus</i> | NKXS01002685.1 | 77432  | 0.25 |
| <i>H. impetiginosus</i> | NKXS01002685.1 | 77450  | 0.25 |
| <i>H. impetiginosus</i> | NKXS01002685.1 | 77468  | 0.25 |
| <i>H. impetiginosus</i> | NKXS01002730.1 | 26366  | 0.25 |
| <i>H. impetiginosus</i> | NKXS01002730.1 | 26584  | 0.25 |
| <i>H. impetiginosus</i> | NKXS01002730.1 | 50294  | 0.25 |
| <i>H. impetiginosus</i> | NKXS01002730.1 | 50368  | 0.25 |
| <i>H. impetiginosus</i> | NKXS01002750.1 | 34279  | 0.25 |
| <i>H. impetiginosus</i> | NKXS01002756.1 | 44793  | 0.25 |
| <i>H. impetiginosus</i> | NKXS01002839.1 | 9188   | 0.25 |
| <i>H. impetiginosus</i> | NKXS01002873.1 | 106569 | 0.25 |
| <i>H. impetiginosus</i> | NKXS01002876.1 | 36159  | 0.25 |
| <i>H. impetiginosus</i> | NKXS01002883.1 | 44702  | 0.25 |
| <i>H. impetiginosus</i> | NKXS01002946.1 | 17030  | 0.25 |
| <i>H. impetiginosus</i> | NKXS01003004.1 | 43778  | 0.25 |
| <i>H. impetiginosus</i> | NKXS01003120.1 | 5059   | 0.25 |
| <i>H. impetiginosus</i> | NKXS01003164.1 | 31872  | 0.25 |
| <i>H. impetiginosus</i> | NKXS01003207.1 | 10767  | 0.25 |
| <i>H. impetiginosus</i> | NKXS01003242.1 | 22575  | 0.25 |
| <i>H. impetiginosus</i> | NKXS01003278.1 | 59660  | 0.25 |
| <i>H. impetiginosus</i> | NKXS01003278.1 | 59666  | 0.25 |
| <i>H. impetiginosus</i> | NKXS01003278.1 | 61942  | 0.25 |
| <i>H. impetiginosus</i> | NKXS01003313.1 | 38163  | 0.25 |
| <i>H. impetiginosus</i> | NKXS01003313.1 | 38219  | 0.25 |
| <i>H. impetiginosus</i> | NKXS01003435.1 | 22624  | 0.25 |
| <i>H. impetiginosus</i> | NKXS01003480.1 | 9496   | 0.25 |
| <i>H. impetiginosus</i> | NKXS01003503.1 | 4403   | 0.25 |
| <i>H. impetiginosus</i> | NKXS01003536.1 | 6079   | 0.25 |
| <i>H. impetiginosus</i> | NKXS01003719.1 | 67417  | 0.25 |
| <i>H. impetiginosus</i> | NKXS01003719.1 | 70873  | 0.25 |
| <i>H. impetiginosus</i> | NKXS01003787.1 | 6048   | 0.25 |
| <i>H. impetiginosus</i> | NKXS01003794.1 | 34758  | 0.25 |

|                         |                |        |      |
|-------------------------|----------------|--------|------|
| <i>H. impetiginosus</i> | NKXS01003849.1 | 35909  | 0.25 |
| <i>H. impetiginosus</i> | NKXS01003947.1 | 41935  | 0.25 |
| <i>H. impetiginosus</i> | NKXS01003949.1 | 34058  | 0.25 |
| <i>H. impetiginosus</i> | NKXS01003949.1 | 34062  | 0.25 |
| <i>H. impetiginosus</i> | NKXS01003949.1 | 34100  | 0.25 |
| <i>H. impetiginosus</i> | NKXS01003949.1 | 34115  | 0.25 |
| <i>H. impetiginosus</i> | NKXS01003949.1 | 34221  | 0.25 |
| <i>H. impetiginosus</i> | NKXS01003949.1 | 34253  | 0.25 |
| <i>H. impetiginosus</i> | NKXS01003949.1 | 34259  | 0.25 |
| <i>H. impetiginosus</i> | NKXS01003972.1 | 46502  | 0.25 |
| <i>H. impetiginosus</i> | NKXS01003981.1 | 26474  | 0.25 |
| <i>H. impetiginosus</i> | NKXS01004000.1 | 103446 | 0.25 |
| <i>H. impetiginosus</i> | NKXS01004041.1 | 7078   | 0.25 |
| <i>H. impetiginosus</i> | NKXS01004098.1 | 32016  | 0.25 |
| <i>H. impetiginosus</i> | NKXS01004179.1 | 2147   | 0.25 |
| <i>H. impetiginosus</i> | NKXS01004247.1 | 38703  | 0.25 |
| <i>H. impetiginosus</i> | NKXS01004334.1 | 90206  | 0.25 |
| <i>H. impetiginosus</i> | NKXS01004338.1 | 17892  | 0.25 |
| <i>H. impetiginosus</i> | NKXS01004443.1 | 85848  | 0.25 |
| <i>H. impetiginosus</i> | NKXS01004469.1 | 19009  | 0.25 |
| <i>H. impetiginosus</i> | NKXS01004473.1 | 7172   | 0.25 |
| <i>H. impetiginosus</i> | NKXS01004507.1 | 112263 | 0.25 |
| <i>H. impetiginosus</i> | NKXS01004536.1 | 39315  | 0.25 |
| <i>H. impetiginosus</i> | NKXS01004620.1 | 9811   | 0.25 |
| <i>H. impetiginosus</i> | NKXS01004658.1 | 21249  | 0.25 |
| <i>H. impetiginosus</i> | NKXS01004804.1 | 16876  | 0.25 |
| <i>H. impetiginosus</i> | NKXS01004804.1 | 16916  | 0.25 |
| <i>H. impetiginosus</i> | NKXS01004812.1 | 29611  | 0.25 |
| <i>H. impetiginosus</i> | NKXS01004843.1 | 41901  | 0.25 |
| <i>H. impetiginosus</i> | NKXS01004927.1 | 17133  | 0.25 |
| <i>H. impetiginosus</i> | NKXS01004943.1 | 93863  | 0.25 |
| <i>H. impetiginosus</i> | NKXS01004997.1 | 24568  | 0.25 |
| <i>H. impetiginosus</i> | NKXS01005005.1 | 34971  | 0.25 |
| <i>H. impetiginosus</i> | NKXS01005050.1 | 54720  | 0.25 |
| <i>H. impetiginosus</i> | NKXS01005050.1 | 54756  | 0.25 |
| <i>H. impetiginosus</i> | NKXS01005245.1 | 10074  | 0.25 |
| <i>H. impetiginosus</i> | NKXS01005312.1 | 11766  | 0.25 |
| <i>H. impetiginosus</i> | NKXS01005312.1 | 11802  | 0.25 |
| <i>H. impetiginosus</i> | NKXS01005312.1 | 11803  | 0.25 |
| <i>H. impetiginosus</i> | NKXS01005329.1 | 33673  | 0.25 |
| <i>H. impetiginosus</i> | NKXS01005413.1 | 36283  | 0.25 |
| <i>H. impetiginosus</i> | NKXS01005463.1 | 41119  | 0.25 |
| <i>H. impetiginosus</i> | NKXS01005506.1 | 13461  | 0.25 |
| <i>H. impetiginosus</i> | NKXS01005511.1 | 6657   | 0.25 |

|                         |                |       |      |
|-------------------------|----------------|-------|------|
| <i>H. impetiginosus</i> | NKXS01005511.1 | 6672  | 0.25 |
| <i>H. impetiginosus</i> | NKXS01005600.1 | 49680 | 0.25 |
| <i>H. impetiginosus</i> | NKXS01005600.1 | 49895 | 0.25 |
| <i>H. impetiginosus</i> | NKXS01005855.1 | 36931 | 0.25 |
| <i>H. impetiginosus</i> | NKXS01005867.1 | 41381 | 0.25 |
| <i>H. impetiginosus</i> | NKXS01005867.1 | 41400 | 0.25 |
| <i>H. impetiginosus</i> | NKXS01005981.1 | 15490 | 0.25 |
| <i>H. impetiginosus</i> | NKXS01005998.1 | 41144 | 0.25 |
| <i>H. impetiginosus</i> | NKXS01006038.1 | 24459 | 0.25 |
| <i>H. impetiginosus</i> | NKXS01006071.1 | 38061 | 0.25 |
| <i>H. impetiginosus</i> | NKXS01006096.1 | 14954 | 0.25 |
| <i>H. impetiginosus</i> | NKXS01006096.1 | 20319 | 0.25 |
| <i>H. impetiginosus</i> | NKXS01006096.1 | 20320 | 0.25 |
| <i>H. impetiginosus</i> | NKXS01006250.1 | 19020 | 0.25 |
| <i>H. impetiginosus</i> | NKXS01006255.1 | 27791 | 0.25 |
| <i>H. impetiginosus</i> | NKXS01006318.1 | 16344 | 0.25 |
| <i>H. impetiginosus</i> | NKXS01006626.1 | 21698 | 0.25 |
| <i>H. impetiginosus</i> | NKXS01006719.1 | 24873 | 0.25 |
| <i>H. impetiginosus</i> | NKXS01006752.1 | 5575  | 0.25 |
| <i>H. impetiginosus</i> | NKXS01006806.1 | 16336 | 0.25 |
| <i>H. impetiginosus</i> | NKXS01006848.1 | 17495 | 0.25 |
| <i>H. impetiginosus</i> | NKXS01006899.1 | 3782  | 0.25 |
| <i>H. impetiginosus</i> | NKXS01007519.1 | 10882 | 0.25 |
| <i>H. impetiginosus</i> | NKXS01007696.1 | 11346 | 0.25 |
| <i>H. impetiginosus</i> | NKXS01007696.1 | 11347 | 0.25 |
| <i>H. impetiginosus</i> | NKXS01007696.1 | 11384 | 0.25 |
| <i>H. impetiginosus</i> | NKXS01007696.1 | 11445 | 0.25 |
| <i>H. impetiginosus</i> | NKXS01007696.1 | 11525 | 0.25 |
| <i>H. impetiginosus</i> | NKXS01007969.1 | 13014 | 0.25 |
| <i>H. impetiginosus</i> | NKXS01007969.1 | 13054 | 0.25 |
| <i>H. impetiginosus</i> | NKXS01007985.1 | 6780  | 0.25 |
| <i>H. impetiginosus</i> | NKXS01008108.1 | 11709 | 0.25 |
| <i>H. impetiginosus</i> | NKXS01008530.1 | 16981 | 0.25 |
| <i>H. impetiginosus</i> | NKXS01008530.1 | 17022 | 0.25 |
| <i>H. impetiginosus</i> | NKXS01008881.1 | 11296 | 0.25 |
| <i>H. impetiginosus</i> | NKXS01008896.1 | 14356 | 0.25 |
| <i>H. impetiginosus</i> | NKXS01008955.1 | 13811 | 0.25 |
| <i>H. impetiginosus</i> | NKXS01009493.1 | 5028  | 0.25 |
| <i>H. impetiginosus</i> | NKXS01009549.1 | 348   | 0.25 |
| <i>H. impetiginosus</i> | NKXS01009757.1 | 2295  | 0.25 |
| <i>H. impetiginosus</i> | NKXS01009948.1 | 1634  | 0.25 |
| <i>H. impetiginosus</i> | NKXS01012469.1 | 940   | 0.25 |
| <i>H. impetiginosus</i> | NKXS01012469.1 | 1045  | 0.25 |
| <i>H. impetiginosus</i> | NKXS01012469.1 | 1085  | 0.25 |

|                         |                |        |      |
|-------------------------|----------------|--------|------|
| <i>H. impetiginosus</i> | NKXS01000030.1 | 357704 | 0.19 |
| <i>H. impetiginosus</i> | NKXS01000030.1 | 357813 | 0.19 |
| <i>H. impetiginosus</i> | NKXS01000030.1 | 357886 | 0.19 |
| <i>H. impetiginosus</i> | NKXS01000090.1 | 31090  | 0.19 |
| <i>H. impetiginosus</i> | NKXS01000158.1 | 15461  | 0.19 |
| <i>H. impetiginosus</i> | NKXS01000158.1 | 15518  | 0.19 |
| <i>H. impetiginosus</i> | NKXS01000159.1 | 20848  | 0.19 |
| <i>H. impetiginosus</i> | NKXS01000172.1 | 90541  | 0.19 |
| <i>H. impetiginosus</i> | NKXS01000199.1 | 176954 | 0.19 |
| <i>H. impetiginosus</i> | NKXS01000199.1 | 177145 | 0.19 |
| <i>H. impetiginosus</i> | NKXS01000217.1 | 65171  | 0.19 |
| <i>H. impetiginosus</i> | NKXS01000244.1 | 124873 | 0.19 |
| <i>H. impetiginosus</i> | NKXS01000269.1 | 50877  | 0.19 |
| <i>H. impetiginosus</i> | NKXS01000298.1 | 171708 | 0.19 |
| <i>H. impetiginosus</i> | NKXS01000396.1 | 67110  | 0.19 |
| <i>H. impetiginosus</i> | NKXS01000397.1 | 295    | 0.19 |
| <i>H. impetiginosus</i> | NKXS01000410.1 | 47257  | 0.19 |
| <i>H. impetiginosus</i> | NKXS01000410.1 | 47315  | 0.19 |
| <i>H. impetiginosus</i> | NKXS01000455.1 | 123543 | 0.19 |
| <i>H. impetiginosus</i> | NKXS01000484.1 | 137203 | 0.19 |
| <i>H. impetiginosus</i> | NKXS01000484.1 | 137289 | 0.19 |
| <i>H. impetiginosus</i> | NKXS01000487.1 | 107190 | 0.19 |
| <i>H. impetiginosus</i> | NKXS01000523.1 | 123022 | 0.19 |
| <i>H. impetiginosus</i> | NKXS01000558.1 | 180279 | 0.19 |
| <i>H. impetiginosus</i> | NKXS01000558.1 | 180392 | 0.19 |
| <i>H. impetiginosus</i> | NKXS01000562.1 | 56550  | 0.19 |
| <i>H. impetiginosus</i> | NKXS01000562.1 | 56583  | 0.19 |
| <i>H. impetiginosus</i> | NKXS01000562.1 | 56631  | 0.19 |
| <i>H. impetiginosus</i> | NKXS01000562.1 | 56637  | 0.19 |
| <i>H. impetiginosus</i> | NKXS01000562.1 | 56657  | 0.19 |
| <i>H. impetiginosus</i> | NKXS01000562.1 | 56706  | 0.19 |
| <i>H. impetiginosus</i> | NKXS01000562.1 | 56760  | 0.19 |
| <i>H. impetiginosus</i> | NKXS01000584.1 | 9457   | 0.19 |
| <i>H. impetiginosus</i> | NKXS01000584.1 | 9547   | 0.19 |
| <i>H. impetiginosus</i> | NKXS01000584.1 | 45269  | 0.19 |
| <i>H. impetiginosus</i> | NKXS01000654.1 | 44648  | 0.19 |
| <i>H. impetiginosus</i> | NKXS01000654.1 | 44666  | 0.19 |
| <i>H. impetiginosus</i> | NKXS01000655.1 | 56576  | 0.19 |
| <i>H. impetiginosus</i> | NKXS01000655.1 | 56626  | 0.19 |
| <i>H. impetiginosus</i> | NKXS01000676.1 | 9091   | 0.19 |
| <i>H. impetiginosus</i> | NKXS01000702.1 | 52056  | 0.19 |
| <i>H. impetiginosus</i> | NKXS01000871.1 | 135104 | 0.19 |
| <i>H. impetiginosus</i> | NKXS01000919.1 | 35131  | 0.19 |
| <i>H. impetiginosus</i> | NKXS01000945.1 | 34469  | 0.19 |



|                         |                |        |      |
|-------------------------|----------------|--------|------|
| <i>H. impetiginosus</i> | NKXS01000945.1 | 34659  | 0.19 |
| <i>H. impetiginosus</i> | NKXS01000995.1 | 12102  | 0.19 |
| <i>H. impetiginosus</i> | NKXS01001004.1 | 68513  | 0.19 |
| <i>H. impetiginosus</i> | NKXS01001041.1 | 8528   | 0.19 |
| <i>H. impetiginosus</i> | NKXS01001041.1 | 8668   | 0.19 |
| <i>H. impetiginosus</i> | NKXS01001041.1 | 8699   | 0.19 |
| <i>H. impetiginosus</i> | NKXS01001041.1 | 8723   | 0.19 |
| <i>H. impetiginosus</i> | NKXS01001041.1 | 8757   | 0.19 |
| <i>H. impetiginosus</i> | NKXS01001041.1 | 8763   | 0.19 |
| <i>H. impetiginosus</i> | NKXS01001041.1 | 8765   | 0.19 |
| <i>H. impetiginosus</i> | NKXS01001074.1 | 246    | 0.19 |
| <i>H. impetiginosus</i> | NKXS01001087.1 | 107078 | 0.19 |
| <i>H. impetiginosus</i> | NKXS01001138.1 | 87352  | 0.19 |
| <i>H. impetiginosus</i> | NKXS01001216.1 | 66251  | 0.19 |
| <i>H. impetiginosus</i> | NKXS01001220.1 | 53310  | 0.19 |
| <i>H. impetiginosus</i> | NKXS01001248.1 | 89222  | 0.19 |
| <i>H. impetiginosus</i> | NKXS01001248.1 | 89340  | 0.19 |
| <i>H. impetiginosus</i> | NKXS01001248.1 | 89355  | 0.19 |
| <i>H. impetiginosus</i> | NKXS01001270.1 | 133207 | 0.19 |
| <i>H. impetiginosus</i> | NKXS01001274.1 | 48635  | 0.19 |
| <i>H. impetiginosus</i> | NKXS01001289.1 | 3911   | 0.19 |
| <i>H. impetiginosus</i> | NKXS01001366.1 | 38073  | 0.19 |
| <i>H. impetiginosus</i> | NKXS01001435.1 | 40331  | 0.19 |
| <i>H. impetiginosus</i> | NKXS01001442.1 | 40064  | 0.19 |
| <i>H. impetiginosus</i> | NKXS01001442.1 | 40066  | 0.19 |
| <i>H. impetiginosus</i> | NKXS01001442.1 | 40157  | 0.19 |
| <i>H. impetiginosus</i> | NKXS01001570.1 | 17930  | 0.19 |
| <i>H. impetiginosus</i> | NKXS01001637.1 | 22778  | 0.19 |
| <i>H. impetiginosus</i> | NKXS01001814.1 | 101316 | 0.19 |
| <i>H. impetiginosus</i> | NKXS01001826.1 | 107297 | 0.19 |
| <i>H. impetiginosus</i> | NKXS01001844.1 | 40388  | 0.19 |
| <i>H. impetiginosus</i> | NKXS01001896.1 | 19367  | 0.19 |
| <i>H. impetiginosus</i> | NKXS01001904.1 | 114645 | 0.19 |
| <i>H. impetiginosus</i> | NKXS01001904.1 | 114661 | 0.19 |
| <i>H. impetiginosus</i> | NKXS01001924.1 | 105082 | 0.19 |
| <i>H. impetiginosus</i> | NKXS01001924.1 | 105086 | 0.19 |
| <i>H. impetiginosus</i> | NKXS01001938.1 | 20200  | 0.19 |
| <i>H. impetiginosus</i> | NKXS01001961.1 | 4333   | 0.19 |
| <i>H. impetiginosus</i> | NKXS01001985.1 | 79480  | 0.19 |
| <i>H. impetiginosus</i> | NKXS01001995.1 | 112555 | 0.19 |
| <i>H. impetiginosus</i> | NKXS01001996.1 | 61229  | 0.19 |
| <i>H. impetiginosus</i> | NKXS01002016.1 | 115593 | 0.19 |
| <i>H. impetiginosus</i> | NKXS01002061.1 | 110492 | 0.19 |
| <i>H. impetiginosus</i> | NKXS01002071.1 | 83544  | 0.19 |

|                         |                |        |      |
|-------------------------|----------------|--------|------|
| <i>H. impetiginosus</i> | NKXS01002112.1 | 23049  | 0.19 |
| <i>H. impetiginosus</i> | NKXS01002193.1 | 32112  | 0.19 |
| <i>H. impetiginosus</i> | NKXS01002228.1 | 87259  | 0.19 |
| <i>H. impetiginosus</i> | NKXS01002228.1 | 87341  | 0.19 |
| <i>H. impetiginosus</i> | NKXS01002228.1 | 87401  | 0.19 |
| <i>H. impetiginosus</i> | NKXS01002228.1 | 87431  | 0.19 |
| <i>H. impetiginosus</i> | NKXS01002344.1 | 83674  | 0.19 |
| <i>H. impetiginosus</i> | NKXS01002396.1 | 10364  | 0.19 |
| <i>H. impetiginosus</i> | NKXS01002456.1 | 84900  | 0.19 |
| <i>H. impetiginosus</i> | NKXS01002456.1 | 84911  | 0.19 |
| <i>H. impetiginosus</i> | NKXS01002456.1 | 85004  | 0.19 |
| <i>H. impetiginosus</i> | NKXS01002456.1 | 85012  | 0.19 |
| <i>H. impetiginosus</i> | NKXS01002456.1 | 85031  | 0.19 |
| <i>H. impetiginosus</i> | NKXS01002491.1 | 116918 | 0.19 |
| <i>H. impetiginosus</i> | NKXS01002491.1 | 116966 | 0.19 |
| <i>H. impetiginosus</i> | NKXS01002603.1 | 32511  | 0.19 |
| <i>H. impetiginosus</i> | NKXS01002625.1 | 65873  | 0.19 |
| <i>H. impetiginosus</i> | NKXS01002625.1 | 65948  | 0.19 |
| <i>H. impetiginosus</i> | NKXS01002626.1 | 31581  | 0.19 |
| <i>H. impetiginosus</i> | NKXS01002704.1 | 61979  | 0.19 |
| <i>H. impetiginosus</i> | NKXS01002705.1 | 210427 | 0.19 |
| <i>H. impetiginosus</i> | NKXS01002705.1 | 210599 | 0.19 |
| <i>H. impetiginosus</i> | NKXS01002705.1 | 210606 | 0.19 |
| <i>H. impetiginosus</i> | NKXS01002742.1 | 438    | 0.19 |
| <i>H. impetiginosus</i> | NKXS01002787.1 | 29291  | 0.19 |
| <i>H. impetiginosus</i> | NKXS01002883.1 | 44830  | 0.19 |
| <i>H. impetiginosus</i> | NKXS01002883.1 | 44834  | 0.19 |
| <i>H. impetiginosus</i> | NKXS01002914.1 | 60480  | 0.19 |
| <i>H. impetiginosus</i> | NKXS01002946.1 | 17027  | 0.19 |
| <i>H. impetiginosus</i> | NKXS01003004.1 | 76690  | 0.19 |
| <i>H. impetiginosus</i> | NKXS01003010.1 | 9443   | 0.19 |
| <i>H. impetiginosus</i> | NKXS01003073.1 | 65007  | 0.19 |
| <i>H. impetiginosus</i> | NKXS01003079.1 | 71341  | 0.19 |
| <i>H. impetiginosus</i> | NKXS01003111.1 | 2487   | 0.19 |
| <i>H. impetiginosus</i> | NKXS01003120.1 | 5058   | 0.19 |
| <i>H. impetiginosus</i> | NKXS01003134.1 | 70956  | 0.19 |
| <i>H. impetiginosus</i> | NKXS01003261.1 | 9498   | 0.19 |
| <i>H. impetiginosus</i> | NKXS01003271.1 | 69700  | 0.19 |
| <i>H. impetiginosus</i> | NKXS01003271.1 | 69732  | 0.19 |
| <i>H. impetiginosus</i> | NKXS01003271.1 | 69807  | 0.19 |
| <i>H. impetiginosus</i> | NKXS01003292.1 | 28225  | 0.19 |
| <i>H. impetiginosus</i> | NKXS01003325.1 | 60203  | 0.19 |
| <i>H. impetiginosus</i> | NKXS01003516.1 | 1376   | 0.19 |
| <i>H. impetiginosus</i> | NKXS01003538.1 | 14076  | 0.19 |

|                         |                |        |      |
|-------------------------|----------------|--------|------|
| <i>H. impetiginosus</i> | NKXS01003546.1 | 37461  | 0.19 |
| <i>H. impetiginosus</i> | NKXS01003580.1 | 21073  | 0.19 |
| <i>H. impetiginosus</i> | NKXS01003655.1 | 6014   | 0.19 |
| <i>H. impetiginosus</i> | NKXS01003686.1 | 10039  | 0.19 |
| <i>H. impetiginosus</i> | NKXS01003787.1 | 6003   | 0.19 |
| <i>H. impetiginosus</i> | NKXS01003796.1 | 43262  | 0.19 |
| <i>H. impetiginosus</i> | NKXS01003925.1 | 9336   | 0.19 |
| <i>H. impetiginosus</i> | NKXS01003972.1 | 46631  | 0.19 |
| <i>H. impetiginosus</i> | NKXS01004000.1 | 109998 | 0.19 |
| <i>H. impetiginosus</i> | NKXS01004000.1 | 110016 | 0.19 |
| <i>H. impetiginosus</i> | NKXS01004098.1 | 31700  | 0.19 |
| <i>H. impetiginosus</i> | NKXS01004098.1 | 31989  | 0.19 |
| <i>H. impetiginosus</i> | NKXS01004098.1 | 32483  | 0.19 |
| <i>H. impetiginosus</i> | NKXS01004162.1 | 36613  | 0.19 |
| <i>H. impetiginosus</i> | NKXS01004162.1 | 36708  | 0.19 |
| <i>H. impetiginosus</i> | NKXS01004323.1 | 3270   | 0.19 |
| <i>H. impetiginosus</i> | NKXS01004394.1 | 21654  | 0.19 |
| <i>H. impetiginosus</i> | NKXS01004469.1 | 18963  | 0.19 |
| <i>H. impetiginosus</i> | NKXS01004469.1 | 19043  | 0.19 |
| <i>H. impetiginosus</i> | NKXS01004469.1 | 19169  | 0.19 |
| <i>H. impetiginosus</i> | NKXS01004475.1 | 3412   | 0.19 |
| <i>H. impetiginosus</i> | NKXS01004476.1 | 24456  | 0.19 |
| <i>H. impetiginosus</i> | NKXS01004583.1 | 13639  | 0.19 |
| <i>H. impetiginosus</i> | NKXS01004583.1 | 13663  | 0.19 |
| <i>H. impetiginosus</i> | NKXS01004643.1 | 17203  | 0.19 |
| <i>H. impetiginosus</i> | NKXS01004803.1 | 22798  | 0.19 |
| <i>H. impetiginosus</i> | NKXS01004803.1 | 23019  | 0.19 |
| <i>H. impetiginosus</i> | NKXS01004843.1 | 41878  | 0.19 |
| <i>H. impetiginosus</i> | NKXS01004843.1 | 41923  | 0.19 |
| <i>H. impetiginosus</i> | NKXS01004843.1 | 42140  | 0.19 |
| <i>H. impetiginosus</i> | NKXS01004877.1 | 10723  | 0.19 |
| <i>H. impetiginosus</i> | NKXS01004913.1 | 56579  | 0.19 |
| <i>H. impetiginosus</i> | NKXS01004913.1 | 56656  | 0.19 |
| <i>H. impetiginosus</i> | NKXS01004913.1 | 56674  | 0.19 |
| <i>H. impetiginosus</i> | NKXS01004913.1 | 56698  | 0.19 |
| <i>H. impetiginosus</i> | NKXS01004913.1 | 56740  | 0.19 |
| <i>H. impetiginosus</i> | NKXS01004913.1 | 56787  | 0.19 |
| <i>H. impetiginosus</i> | NKXS01004913.1 | 56823  | 0.19 |
| <i>H. impetiginosus</i> | NKXS01004983.1 | 12654  | 0.19 |
| <i>H. impetiginosus</i> | NKXS01004983.1 | 12700  | 0.19 |
| <i>H. impetiginosus</i> | NKXS01005156.1 | 24125  | 0.19 |
| <i>H. impetiginosus</i> | NKXS01005264.1 | 987    | 0.19 |
| <i>H. impetiginosus</i> | NKXS01005264.1 | 991    | 0.19 |
| <i>H. impetiginosus</i> | NKXS01005264.1 | 999    | 0.19 |

|                         |                |       |      |
|-------------------------|----------------|-------|------|
| <i>H. impetiginosus</i> | NKXS01005264.1 | 1045  | 0.19 |
| <i>H. impetiginosus</i> | NKXS01005264.1 | 1112  | 0.19 |
| <i>H. impetiginosus</i> | NKXS01005273.1 | 31475 | 0.19 |
| <i>H. impetiginosus</i> | NKXS01005291.1 | 18062 | 0.19 |
| <i>H. impetiginosus</i> | NKXS01005329.1 | 33848 | 0.19 |
| <i>H. impetiginosus</i> | NKXS01005381.1 | 16147 | 0.19 |
| <i>H. impetiginosus</i> | NKXS01005434.1 | 3400  | 0.19 |
| <i>H. impetiginosus</i> | NKXS01005511.1 | 6685  | 0.19 |
| <i>H. impetiginosus</i> | NKXS01005564.1 | 80903 | 0.19 |
| <i>H. impetiginosus</i> | NKXS01005636.1 | 18019 | 0.19 |
| <i>H. impetiginosus</i> | NKXS01005643.1 | 21623 | 0.19 |
| <i>H. impetiginosus</i> | NKXS01005698.1 | 37902 | 0.19 |
| <i>H. impetiginosus</i> | NKXS01005858.1 | 12037 | 0.19 |
| <i>H. impetiginosus</i> | NKXS01005858.1 | 12093 | 0.19 |
| <i>H. impetiginosus</i> | NKXS01005933.1 | 49671 | 0.19 |
| <i>H. impetiginosus</i> | NKXS01005950.1 | 12325 | 0.19 |
| <i>H. impetiginosus</i> | NKXS01005998.1 | 41232 | 0.19 |
| <i>H. impetiginosus</i> | NKXS01006096.1 | 20431 | 0.19 |
| <i>H. impetiginosus</i> | NKXS01006201.1 | 20096 | 0.19 |
| <i>H. impetiginosus</i> | NKXS01006228.1 | 23196 | 0.19 |
| <i>H. impetiginosus</i> | NKXS01006250.1 | 21123 | 0.19 |
| <i>H. impetiginosus</i> | NKXS01006297.1 | 37071 | 0.19 |
| <i>H. impetiginosus</i> | NKXS01006297.1 | 37119 | 0.19 |
| <i>H. impetiginosus</i> | NKXS01006314.1 | 62717 | 0.19 |
| <i>H. impetiginosus</i> | NKXS01006362.1 | 18443 | 0.19 |
| <i>H. impetiginosus</i> | NKXS01006438.1 | 29698 | 0.19 |
| <i>H. impetiginosus</i> | NKXS01006554.1 | 11466 | 0.19 |
| <i>H. impetiginosus</i> | NKXS01006616.1 | 34854 | 0.19 |
| <i>H. impetiginosus</i> | NKXS01006679.1 | 1801  | 0.19 |
| <i>H. impetiginosus</i> | NKXS01006800.1 | 19498 | 0.19 |
| <i>H. impetiginosus</i> | NKXS01006800.1 | 19642 | 0.19 |
| <i>H. impetiginosus</i> | NKXS01007124.1 | 1371  | 0.19 |
| <i>H. impetiginosus</i> | NKXS01007124.1 | 1392  | 0.19 |
| <i>H. impetiginosus</i> | NKXS01007124.1 | 1470  | 0.19 |
| <i>H. impetiginosus</i> | NKXS01007124.1 | 1545  | 0.19 |
| <i>H. impetiginosus</i> | NKXS01007218.1 | 10284 | 0.19 |
| <i>H. impetiginosus</i> | NKXS01007218.1 | 10365 | 0.19 |
| <i>H. impetiginosus</i> | NKXS01007300.1 | 23068 | 0.19 |
| <i>H. impetiginosus</i> | NKXS01007362.1 | 22258 | 0.19 |
| <i>H. impetiginosus</i> | NKXS01007414.1 | 3394  | 0.19 |
| <i>H. impetiginosus</i> | NKXS01007673.1 | 15906 | 0.19 |
| <i>H. impetiginosus</i> | NKXS01007696.1 | 11501 | 0.19 |
| <i>H. impetiginosus</i> | NKXS01007696.1 | 11554 | 0.19 |
| <i>H. impetiginosus</i> | NKXS01007696.1 | 11564 | 0.19 |

|                         |                |        |      |
|-------------------------|----------------|--------|------|
| <i>H. impetiginosus</i> | NKXS01008073.1 | 8669   | 0.19 |
| <i>H. impetiginosus</i> | NKXS01008073.1 | 8749   | 0.19 |
| <i>H. impetiginosus</i> | NKXS01008472.1 | 28639  | 0.19 |
| <i>H. impetiginosus</i> | NKXS01009188.1 | 8847   | 0.19 |
| <i>H. impetiginosus</i> | NKXS01009549.1 | 340    | 0.19 |
| <i>H. impetiginosus</i> | NKXS01009757.1 | 2028   | 0.19 |
| <i>H. impetiginosus</i> | NKXS01010116.1 | 2779   | 0.19 |
| <i>H. impetiginosus</i> | NKXS01010886.1 | 1509   | 0.19 |
| <i>H. impetiginosus</i> | NKXS01000016.1 | 30502  | 0.13 |
| <i>H. impetiginosus</i> | NKXS01000021.1 | 211384 | 0.13 |
| <i>H. impetiginosus</i> | NKXS01000064.1 | 196159 | 0.13 |
| <i>H. impetiginosus</i> | NKXS01000067.1 | 4898   | 0.13 |
| <i>H. impetiginosus</i> | NKXS01000094.1 | 184667 | 0.13 |
| <i>H. impetiginosus</i> | NKXS01000094.1 | 184718 | 0.13 |
| <i>H. impetiginosus</i> | NKXS01000096.1 | 245534 | 0.13 |
| <i>H. impetiginosus</i> | NKXS01000102.1 | 85255  | 0.13 |
| <i>H. impetiginosus</i> | NKXS01000110.1 | 109811 | 0.13 |
| <i>H. impetiginosus</i> | NKXS01000164.1 | 87078  | 0.13 |
| <i>H. impetiginosus</i> | NKXS01000218.1 | 110235 | 0.13 |
| <i>H. impetiginosus</i> | NKXS01000218.1 | 110309 | 0.13 |
| <i>H. impetiginosus</i> | NKXS01000238.1 | 134297 | 0.13 |
| <i>H. impetiginosus</i> | NKXS01000298.1 | 171778 | 0.13 |
| <i>H. impetiginosus</i> | NKXS01000422.1 | 8530   | 0.13 |
| <i>H. impetiginosus</i> | NKXS01000450.1 | 15173  | 0.13 |
| <i>H. impetiginosus</i> | NKXS01000450.1 | 15382  | 0.13 |
| <i>H. impetiginosus</i> | NKXS01000455.1 | 123687 | 0.13 |
| <i>H. impetiginosus</i> | NKXS01000455.1 | 123780 | 0.13 |
| <i>H. impetiginosus</i> | NKXS01000487.1 | 107013 | 0.13 |
| <i>H. impetiginosus</i> | NKXS01000568.1 | 58253  | 0.13 |
| <i>H. impetiginosus</i> | NKXS01000593.1 | 16296  | 0.13 |
| <i>H. impetiginosus</i> | NKXS01000602.1 | 150057 | 0.13 |
| <i>H. impetiginosus</i> | NKXS01000602.1 | 150118 | 0.13 |
| <i>H. impetiginosus</i> | NKXS01000610.1 | 16276  | 0.13 |
| <i>H. impetiginosus</i> | NKXS01000610.1 | 16329  | 0.13 |
| <i>H. impetiginosus</i> | NKXS01000610.1 | 16333  | 0.13 |
| <i>H. impetiginosus</i> | NKXS01000610.1 | 16334  | 0.13 |
| <i>H. impetiginosus</i> | NKXS01000610.1 | 16377  | 0.13 |
| <i>H. impetiginosus</i> | NKXS01000610.1 | 16408  | 0.13 |
| <i>H. impetiginosus</i> | NKXS01000610.1 | 16447  | 0.13 |
| <i>H. impetiginosus</i> | NKXS01000610.1 | 16501  | 0.13 |
| <i>H. impetiginosus</i> | NKXS01000610.1 | 16504  | 0.13 |
| <i>H. impetiginosus</i> | NKXS01000610.1 | 16508  | 0.13 |
| <i>H. impetiginosus</i> | NKXS01000610.1 | 16510  | 0.13 |
| <i>H. impetiginosus</i> | NKXS01000653.1 | 1313   | 0.13 |

|                         |                |        |      |
|-------------------------|----------------|--------|------|
| <i>H. impetiginosus</i> | NKXS01000744.1 | 29896  | 0.13 |
| <i>H. impetiginosus</i> | NKXS01000852.1 | 110470 | 0.13 |
| <i>H. impetiginosus</i> | NKXS01000858.1 | 11180  | 0.13 |
| <i>H. impetiginosus</i> | NKXS01000867.1 | 95825  | 0.13 |
| <i>H. impetiginosus</i> | NKXS01000871.1 | 100905 | 0.13 |
| <i>H. impetiginosus</i> | NKXS01000882.1 | 113287 | 0.13 |
| <i>H. impetiginosus</i> | NKXS01000891.1 | 36272  | 0.13 |
| <i>H. impetiginosus</i> | NKXS01000891.1 | 36281  | 0.13 |
| <i>H. impetiginosus</i> | NKXS01000905.1 | 141530 | 0.13 |
| <i>H. impetiginosus</i> | NKXS01000906.1 | 53392  | 0.13 |
| <i>H. impetiginosus</i> | NKXS01000925.1 | 52913  | 0.13 |
| <i>H. impetiginosus</i> | NKXS01001041.1 | 8702   | 0.13 |
| <i>H. impetiginosus</i> | NKXS01001041.1 | 22633  | 0.13 |
| <i>H. impetiginosus</i> | NKXS01001087.1 | 107033 | 0.13 |
| <i>H. impetiginosus</i> | NKXS01001122.1 | 185995 | 0.13 |
| <i>H. impetiginosus</i> | NKXS01001134.1 | 14407  | 0.13 |
| <i>H. impetiginosus</i> | NKXS01001211.1 | 24901  | 0.13 |
| <i>H. impetiginosus</i> | NKXS01001308.1 | 29730  | 0.13 |
| <i>H. impetiginosus</i> | NKXS01001308.1 | 29826  | 0.13 |
| <i>H. impetiginosus</i> | NKXS01001328.1 | 60493  | 0.13 |
| <i>H. impetiginosus</i> | NKXS01001366.1 | 33857  | 0.13 |
| <i>H. impetiginosus</i> | NKXS01001366.1 | 34001  | 0.13 |
| <i>H. impetiginosus</i> | NKXS01001442.1 | 40176  | 0.13 |
| <i>H. impetiginosus</i> | NKXS01001442.1 | 40183  | 0.13 |
| <i>H. impetiginosus</i> | NKXS01001448.1 | 83971  | 0.13 |
| <i>H. impetiginosus</i> | NKXS01001495.1 | 75568  | 0.13 |
| <i>H. impetiginosus</i> | NKXS01001495.1 | 75655  | 0.13 |
| <i>H. impetiginosus</i> | NKXS01001505.1 | 83937  | 0.13 |
| <i>H. impetiginosus</i> | NKXS01001511.1 | 41466  | 0.13 |
| <i>H. impetiginosus</i> | NKXS01001534.1 | 11253  | 0.13 |
| <i>H. impetiginosus</i> | NKXS01001584.1 | 51835  | 0.13 |
| <i>H. impetiginosus</i> | NKXS01001588.1 | 105436 | 0.13 |
| <i>H. impetiginosus</i> | NKXS01001696.1 | 18619  | 0.13 |
| <i>H. impetiginosus</i> | NKXS01001772.1 | 106452 | 0.13 |
| <i>H. impetiginosus</i> | NKXS01001803.1 | 96754  | 0.13 |
| <i>H. impetiginosus</i> | NKXS01001851.1 | 1739   | 0.13 |
| <i>H. impetiginosus</i> | NKXS01001857.1 | 31239  | 0.13 |
| <i>H. impetiginosus</i> | NKXS01001892.1 | 2440   | 0.13 |
| <i>H. impetiginosus</i> | NKXS01001892.1 | 2572   | 0.13 |
| <i>H. impetiginosus</i> | NKXS01001893.1 | 51465  | 0.13 |
| <i>H. impetiginosus</i> | NKXS01001896.1 | 19390  | 0.13 |
| <i>H. impetiginosus</i> | NKXS01001938.1 | 20243  | 0.13 |
| <i>H. impetiginosus</i> | NKXS01001938.1 | 20427  | 0.13 |
| <i>H. impetiginosus</i> | NKXS01002071.1 | 83376  | 0.13 |

|                         |                |        |      |
|-------------------------|----------------|--------|------|
| <i>H. impetiginosus</i> | NKXS01002108.1 | 3870   | 0.13 |
| <i>H. impetiginosus</i> | NKXS01002133.1 | 33218  | 0.13 |
| <i>H. impetiginosus</i> | NKXS01002133.1 | 33248  | 0.13 |
| <i>H. impetiginosus</i> | NKXS01002170.1 | 5071   | 0.13 |
| <i>H. impetiginosus</i> | NKXS01002170.1 | 5244   | 0.13 |
| <i>H. impetiginosus</i> | NKXS01002193.1 | 32283  | 0.13 |
| <i>H. impetiginosus</i> | NKXS01002385.1 | 34961  | 0.13 |
| <i>H. impetiginosus</i> | NKXS01002396.1 | 10288  | 0.13 |
| <i>H. impetiginosus</i> | NKXS01002469.1 | 72818  | 0.13 |
| <i>H. impetiginosus</i> | NKXS01002470.1 | 34945  | 0.13 |
| <i>H. impetiginosus</i> | NKXS01002490.1 | 39490  | 0.13 |
| <i>H. impetiginosus</i> | NKXS01002490.1 | 39595  | 0.13 |
| <i>H. impetiginosus</i> | NKXS01002515.1 | 31067  | 0.13 |
| <i>H. impetiginosus</i> | NKXS01002555.1 | 35272  | 0.13 |
| <i>H. impetiginosus</i> | NKXS01002626.1 | 31615  | 0.13 |
| <i>H. impetiginosus</i> | NKXS01002626.1 | 31758  | 0.13 |
| <i>H. impetiginosus</i> | NKXS01002642.1 | 36594  | 0.13 |
| <i>H. impetiginosus</i> | NKXS01002642.1 | 36685  | 0.13 |
| <i>H. impetiginosus</i> | NKXS01002705.1 | 210579 | 0.13 |
| <i>H. impetiginosus</i> | NKXS01002726.1 | 16271  | 0.13 |
| <i>H. impetiginosus</i> | NKXS01002728.1 | 47988  | 0.13 |
| <i>H. impetiginosus</i> | NKXS01002730.1 | 26540  | 0.13 |
| <i>H. impetiginosus</i> | NKXS01002742.1 | 492    | 0.13 |
| <i>H. impetiginosus</i> | NKXS01002747.1 | 39309  | 0.13 |
| <i>H. impetiginosus</i> | NKXS01002762.1 | 515    | 0.13 |
| <i>H. impetiginosus</i> | NKXS01002762.1 | 632    | 0.13 |
| <i>H. impetiginosus</i> | NKXS01002762.1 | 704    | 0.13 |
| <i>H. impetiginosus</i> | NKXS01002787.1 | 29179  | 0.13 |
| <i>H. impetiginosus</i> | NKXS01002787.1 | 29387  | 0.13 |
| <i>H. impetiginosus</i> | NKXS01002787.1 | 29397  | 0.13 |
| <i>H. impetiginosus</i> | NKXS01002793.1 | 87339  | 0.13 |
| <i>H. impetiginosus</i> | NKXS01002866.1 | 46436  | 0.13 |
| <i>H. impetiginosus</i> | NKXS01002873.1 | 106738 | 0.13 |
| <i>H. impetiginosus</i> | NKXS01002941.1 | 22034  | 0.13 |
| <i>H. impetiginosus</i> | NKXS01002944.1 | 1211   | 0.13 |
| <i>H. impetiginosus</i> | NKXS01002946.1 | 16839  | 0.13 |
| <i>H. impetiginosus</i> | NKXS01002946.1 | 16845  | 0.13 |
| <i>H. impetiginosus</i> | NKXS01002946.1 | 16857  | 0.13 |
| <i>H. impetiginosus</i> | NKXS01002946.1 | 16864  | 0.13 |
| <i>H. impetiginosus</i> | NKXS01002946.1 | 16911  | 0.13 |
| <i>H. impetiginosus</i> | NKXS01002946.1 | 16917  | 0.13 |
| <i>H. impetiginosus</i> | NKXS01002946.1 | 17018  | 0.13 |
| <i>H. impetiginosus</i> | NKXS01002946.1 | 17019  | 0.13 |
| <i>H. impetiginosus</i> | NKXS01003154.1 | 72282  | 0.13 |

|                         |                |        |      |
|-------------------------|----------------|--------|------|
| <i>H. impetiginosus</i> | NKXS01003164.1 | 31887  | 0.13 |
| <i>H. impetiginosus</i> | NKXS01003164.1 | 31933  | 0.13 |
| <i>H. impetiginosus</i> | NKXS01003242.1 | 22647  | 0.13 |
| <i>H. impetiginosus</i> | NKXS01003279.1 | 3502   | 0.13 |
| <i>H. impetiginosus</i> | NKXS01003279.1 | 3516   | 0.13 |
| <i>H. impetiginosus</i> | NKXS01003292.1 | 36815  | 0.13 |
| <i>H. impetiginosus</i> | NKXS01003344.1 | 24400  | 0.13 |
| <i>H. impetiginosus</i> | NKXS01003344.1 | 24452  | 0.13 |
| <i>H. impetiginosus</i> | NKXS01003344.1 | 24475  | 0.13 |
| <i>H. impetiginosus</i> | NKXS01003418.1 | 65006  | 0.13 |
| <i>H. impetiginosus</i> | NKXS01003418.1 | 65357  | 0.13 |
| <i>H. impetiginosus</i> | NKXS01003418.1 | 65423  | 0.13 |
| <i>H. impetiginosus</i> | NKXS01003503.1 | 4334   | 0.13 |
| <i>H. impetiginosus</i> | NKXS01003516.1 | 1333   | 0.13 |
| <i>H. impetiginosus</i> | NKXS01003521.1 | 14575  | 0.13 |
| <i>H. impetiginosus</i> | NKXS01003578.1 | 54106  | 0.13 |
| <i>H. impetiginosus</i> | NKXS01003578.1 | 54115  | 0.13 |
| <i>H. impetiginosus</i> | NKXS01003598.1 | 42706  | 0.13 |
| <i>H. impetiginosus</i> | NKXS01003598.1 | 42707  | 0.13 |
| <i>H. impetiginosus</i> | NKXS01003598.1 | 42754  | 0.13 |
| <i>H. impetiginosus</i> | NKXS01003655.1 | 6103   | 0.13 |
| <i>H. impetiginosus</i> | NKXS01003719.1 | 70863  | 0.13 |
| <i>H. impetiginosus</i> | NKXS01003787.1 | 5993   | 0.13 |
| <i>H. impetiginosus</i> | NKXS01003854.1 | 25061  | 0.13 |
| <i>H. impetiginosus</i> | NKXS01003854.1 | 25126  | 0.13 |
| <i>H. impetiginosus</i> | NKXS01003874.1 | 1855   | 0.13 |
| <i>H. impetiginosus</i> | NKXS01003874.1 | 1913   | 0.13 |
| <i>H. impetiginosus</i> | NKXS01003925.1 | 28371  | 0.13 |
| <i>H. impetiginosus</i> | NKXS01003960.1 | 46942  | 0.13 |
| <i>H. impetiginosus</i> | NKXS01003960.1 | 47054  | 0.13 |
| <i>H. impetiginosus</i> | NKXS01003960.1 | 47061  | 0.13 |
| <i>H. impetiginosus</i> | NKXS01004000.1 | 103327 | 0.13 |
| <i>H. impetiginosus</i> | NKXS01004055.1 | 8049   | 0.13 |
| <i>H. impetiginosus</i> | NKXS01004071.1 | 48654  | 0.13 |
| <i>H. impetiginosus</i> | NKXS01004172.1 | 62781  | 0.13 |
| <i>H. impetiginosus</i> | NKXS01004217.1 | 13018  | 0.13 |
| <i>H. impetiginosus</i> | NKXS01004222.1 | 46602  | 0.13 |
| <i>H. impetiginosus</i> | NKXS01004233.1 | 22530  | 0.13 |
| <i>H. impetiginosus</i> | NKXS01004233.1 | 22611  | 0.13 |
| <i>H. impetiginosus</i> | NKXS01004283.1 | 60637  | 0.13 |
| <i>H. impetiginosus</i> | NKXS01004300.1 | 49844  | 0.13 |
| <i>H. impetiginosus</i> | NKXS01004300.1 | 49969  | 0.13 |
| <i>H. impetiginosus</i> | NKXS01004300.1 | 49971  | 0.13 |
| <i>H. impetiginosus</i> | NKXS01004300.1 | 49991  | 0.13 |



|                         |                |       |      |
|-------------------------|----------------|-------|------|
| <i>H. impetiginosus</i> | NKXS01004300.1 | 50054 | 0.13 |
| <i>H. impetiginosus</i> | NKXS01004300.1 | 50067 | 0.13 |
| <i>H. impetiginosus</i> | NKXS01004300.1 | 50091 | 0.13 |
| <i>H. impetiginosus</i> | NKXS01004323.1 | 3193  | 0.13 |
| <i>H. impetiginosus</i> | NKXS01004365.1 | 36553 | 0.13 |
| <i>H. impetiginosus</i> | NKXS01004381.1 | 56604 | 0.13 |
| <i>H. impetiginosus</i> | NKXS01004403.1 | 12598 | 0.13 |
| <i>H. impetiginosus</i> | NKXS01004469.1 | 19116 | 0.13 |
| <i>H. impetiginosus</i> | NKXS01004473.1 | 7039  | 0.13 |
| <i>H. impetiginosus</i> | NKXS01004570.1 | 17241 | 0.13 |
| <i>H. impetiginosus</i> | NKXS01004915.1 | 50533 | 0.13 |
| <i>H. impetiginosus</i> | NKXS01004997.1 | 24646 | 0.13 |
| <i>H. impetiginosus</i> | NKXS01005008.1 | 24691 | 0.13 |
| <i>H. impetiginosus</i> | NKXS01005050.1 | 54758 | 0.13 |
| <i>H. impetiginosus</i> | NKXS01005050.1 | 54763 | 0.13 |
| <i>H. impetiginosus</i> | NKXS01005210.1 | 1637  | 0.13 |
| <i>H. impetiginosus</i> | NKXS01005210.1 | 1745  | 0.13 |
| <i>H. impetiginosus</i> | NKXS01005245.1 | 26921 | 0.13 |
| <i>H. impetiginosus</i> | NKXS01005245.1 | 26967 | 0.13 |
| <i>H. impetiginosus</i> | NKXS01005329.1 | 33664 | 0.13 |
| <i>H. impetiginosus</i> | NKXS01005329.1 | 33717 | 0.13 |
| <i>H. impetiginosus</i> | NKXS01005434.1 | 3417  | 0.13 |
| <i>H. impetiginosus</i> | NKXS01005510.1 | 72993 | 0.13 |
| <i>H. impetiginosus</i> | NKXS01005542.1 | 36828 | 0.13 |
| <i>H. impetiginosus</i> | NKXS01005542.1 | 36843 | 0.13 |
| <i>H. impetiginosus</i> | NKXS01005684.1 | 10415 | 0.13 |
| <i>H. impetiginosus</i> | NKXS01005698.1 | 37722 | 0.13 |
| <i>H. impetiginosus</i> | NKXS01005810.1 | 54460 | 0.13 |
| <i>H. impetiginosus</i> | NKXS01005810.1 | 54550 | 0.13 |
| <i>H. impetiginosus</i> | NKXS01005826.1 | 1558  | 0.13 |
| <i>H. impetiginosus</i> | NKXS01005991.1 | 23244 | 0.13 |
| <i>H. impetiginosus</i> | NKXS01006017.1 | 6080  | 0.13 |
| <i>H. impetiginosus</i> | NKXS01006017.1 | 6130  | 0.13 |
| <i>H. impetiginosus</i> | NKXS01006017.1 | 6142  | 0.13 |
| <i>H. impetiginosus</i> | NKXS01006017.1 | 6155  | 0.13 |
| <i>H. impetiginosus</i> | NKXS01006017.1 | 6189  | 0.13 |
| <i>H. impetiginosus</i> | NKXS01006017.1 | 6196  | 0.13 |
| <i>H. impetiginosus</i> | NKXS01006017.1 | 6255  | 0.13 |
| <i>H. impetiginosus</i> | NKXS01006017.1 | 6269  | 0.13 |
| <i>H. impetiginosus</i> | NKXS01006017.1 | 6281  | 0.13 |
| <i>H. impetiginosus</i> | NKXS01006017.1 | 6311  | 0.13 |
| <i>H. impetiginosus</i> | NKXS01006020.1 | 2588  | 0.13 |
| <i>H. impetiginosus</i> | NKXS01006032.1 | 12487 | 0.13 |
| <i>H. impetiginosus</i> | NKXS01006038.1 | 24273 | 0.13 |

|                         |                |       |      |
|-------------------------|----------------|-------|------|
| <i>H. impetiginosus</i> | NKXS01006060.1 | 61831 | 0.13 |
| <i>H. impetiginosus</i> | NKXS01006060.1 | 61835 | 0.13 |
| <i>H. impetiginosus</i> | NKXS01006060.1 | 61849 | 0.13 |
| <i>H. impetiginosus</i> | NKXS01006060.1 | 61869 | 0.13 |
| <i>H. impetiginosus</i> | NKXS01006185.1 | 33264 | 0.13 |
| <i>H. impetiginosus</i> | NKXS01006185.1 | 35204 | 0.13 |
| <i>H. impetiginosus</i> | NKXS01006206.1 | 1909  | 0.13 |
| <i>H. impetiginosus</i> | NKXS01006250.1 | 19001 | 0.13 |
| <i>H. impetiginosus</i> | NKXS01006250.1 | 21137 | 0.13 |
| <i>H. impetiginosus</i> | NKXS01006250.1 | 21144 | 0.13 |
| <i>H. impetiginosus</i> | NKXS01006314.1 | 62779 | 0.13 |
| <i>H. impetiginosus</i> | NKXS01006318.1 | 16335 | 0.13 |
| <i>H. impetiginosus</i> | NKXS01006318.1 | 16544 | 0.13 |
| <i>H. impetiginosus</i> | NKXS01006362.1 | 18423 | 0.13 |
| <i>H. impetiginosus</i> | NKXS01006381.1 | 24074 | 0.13 |
| <i>H. impetiginosus</i> | NKXS01006381.1 | 24162 | 0.13 |
| <i>H. impetiginosus</i> | NKXS01006381.1 | 24250 | 0.13 |
| <i>H. impetiginosus</i> | NKXS01006554.1 | 11437 | 0.13 |
| <i>H. impetiginosus</i> | NKXS01006719.1 | 24928 | 0.13 |
| <i>H. impetiginosus</i> | NKXS01006806.1 | 16308 | 0.13 |
| <i>H. impetiginosus</i> | NKXS01006920.1 | 32269 | 0.13 |
| <i>H. impetiginosus</i> | NKXS01007005.1 | 10327 | 0.13 |
| <i>H. impetiginosus</i> | NKXS01007121.1 | 8633  | 0.13 |
| <i>H. impetiginosus</i> | NKXS01007124.1 | 1273  | 0.13 |
| <i>H. impetiginosus</i> | NKXS01007176.1 | 124   | 0.13 |
| <i>H. impetiginosus</i> | NKXS01007252.1 | 2652  | 0.13 |
| <i>H. impetiginosus</i> | NKXS01007467.1 | 14087 | 0.13 |
| <i>H. impetiginosus</i> | NKXS01007696.1 | 11461 | 0.13 |
| <i>H. impetiginosus</i> | NKXS01007703.1 | 12439 | 0.13 |
| <i>H. impetiginosus</i> | NKXS01007742.1 | 3653  | 0.13 |
| <i>H. impetiginosus</i> | NKXS01007797.1 | 24366 | 0.13 |
| <i>H. impetiginosus</i> | NKXS01007797.1 | 24437 | 0.13 |
| <i>H. impetiginosus</i> | NKXS01007797.1 | 24478 | 0.13 |
| <i>H. impetiginosus</i> | NKXS01007797.1 | 24537 | 0.13 |
| <i>H. impetiginosus</i> | NKXS01008072.1 | 11026 | 0.13 |
| <i>H. impetiginosus</i> | NKXS01008579.1 | 9698  | 0.13 |
| <i>H. impetiginosus</i> | NKXS01008805.1 | 15559 | 0.13 |
| <i>H. impetiginosus</i> | NKXS01008860.1 | 4874  | 0.13 |
| <i>H. impetiginosus</i> | NKXS01008896.1 | 9564  | 0.13 |
| <i>H. impetiginosus</i> | NKXS01008985.1 | 9793  | 0.13 |
| <i>H. impetiginosus</i> | NKXS01009399.1 | 7475  | 0.13 |
| <i>H. impetiginosus</i> | NKXS01009399.1 | 7631  | 0.13 |
| <i>H. impetiginosus</i> | NKXS01009989.1 | 5166  | 0.13 |
| <i>H. impetiginosus</i> | NKXS01010821.1 | 3593  | 0.13 |

|                         |                |        |      |
|-------------------------|----------------|--------|------|
| <i>H. impetiginosus</i> | NKXS01000021.1 | 211343 | 0.06 |
| <i>H. impetiginosus</i> | NKXS01000041.1 | 281518 | 0.06 |
| <i>H. impetiginosus</i> | NKXS01000041.1 | 281525 | 0.06 |
| <i>H. impetiginosus</i> | NKXS01000053.1 | 205811 | 0.06 |
| <i>H. impetiginosus</i> | NKXS01000055.1 | 61683  | 0.06 |
| <i>H. impetiginosus</i> | NKXS01000067.1 | 5174   | 0.06 |
| <i>H. impetiginosus</i> | NKXS01000067.1 | 5207   | 0.06 |
| <i>H. impetiginosus</i> | NKXS01000079.1 | 36117  | 0.06 |
| <i>H. impetiginosus</i> | NKXS01000087.1 | 14638  | 0.06 |
| <i>H. impetiginosus</i> | NKXS01000087.1 | 14743  | 0.06 |
| <i>H. impetiginosus</i> | NKXS01000087.1 | 14797  | 0.06 |
| <i>H. impetiginosus</i> | NKXS01000094.1 | 184747 | 0.06 |
| <i>H. impetiginosus</i> | NKXS01000097.1 | 29512  | 0.06 |
| <i>H. impetiginosus</i> | NKXS01000097.1 | 29593  | 0.06 |
| <i>H. impetiginosus</i> | NKXS01000102.1 | 85230  | 0.06 |
| <i>H. impetiginosus</i> | NKXS01000102.1 | 85372  | 0.06 |
| <i>H. impetiginosus</i> | NKXS01000147.1 | 91518  | 0.06 |
| <i>H. impetiginosus</i> | NKXS01000157.1 | 168204 | 0.06 |
| <i>H. impetiginosus</i> | NKXS01000168.1 | 42136  | 0.06 |
| <i>H. impetiginosus</i> | NKXS01000168.1 | 42157  | 0.06 |
| <i>H. impetiginosus</i> | NKXS01000168.1 | 42175  | 0.06 |
| <i>H. impetiginosus</i> | NKXS01000168.1 | 42183  | 0.06 |
| <i>H. impetiginosus</i> | NKXS01000186.1 | 275013 | 0.06 |
| <i>H. impetiginosus</i> | NKXS01000218.1 | 110236 | 0.06 |
| <i>H. impetiginosus</i> | NKXS01000244.1 | 124919 | 0.06 |
| <i>H. impetiginosus</i> | NKXS01000269.1 | 49702  | 0.06 |
| <i>H. impetiginosus</i> | NKXS01000279.1 | 29924  | 0.06 |
| <i>H. impetiginosus</i> | NKXS01000298.1 | 171660 | 0.06 |
| <i>H. impetiginosus</i> | NKXS01000329.1 | 5890   | 0.06 |
| <i>H. impetiginosus</i> | NKXS01000368.1 | 754    | 0.06 |
| <i>H. impetiginosus</i> | NKXS01000368.1 | 755    | 0.06 |
| <i>H. impetiginosus</i> | NKXS01000382.1 | 194135 | 0.06 |
| <i>H. impetiginosus</i> | NKXS01000414.1 | 168209 | 0.06 |
| <i>H. impetiginosus</i> | NKXS01000433.1 | 22528  | 0.06 |
| <i>H. impetiginosus</i> | NKXS01000433.1 | 22575  | 0.06 |
| <i>H. impetiginosus</i> | NKXS01000485.1 | 35726  | 0.06 |
| <i>H. impetiginosus</i> | NKXS01000485.1 | 35774  | 0.06 |
| <i>H. impetiginosus</i> | NKXS01000487.1 | 106929 | 0.06 |
| <i>H. impetiginosus</i> | NKXS01000487.1 | 106950 | 0.06 |
| <i>H. impetiginosus</i> | NKXS01000487.1 | 107069 | 0.06 |
| <i>H. impetiginosus</i> | NKXS01000488.1 | 90161  | 0.06 |
| <i>H. impetiginosus</i> | NKXS01000523.1 | 123011 | 0.06 |
| <i>H. impetiginosus</i> | NKXS01000562.1 | 56721  | 0.06 |
| <i>H. impetiginosus</i> | NKXS01000568.1 | 58256  | 0.06 |

|                         |                |        |      |
|-------------------------|----------------|--------|------|
| <i>H. impetiginosus</i> | NKXS01000581.1 | 128788 | 0.06 |
| <i>H. impetiginosus</i> | NKXS01000593.1 | 16183  | 0.06 |
| <i>H. impetiginosus</i> | NKXS01000593.1 | 16250  | 0.06 |
| <i>H. impetiginosus</i> | NKXS01000601.1 | 13737  | 0.06 |
| <i>H. impetiginosus</i> | NKXS01000602.1 | 75180  | 0.06 |
| <i>H. impetiginosus</i> | NKXS01000602.1 | 150074 | 0.06 |
| <i>H. impetiginosus</i> | NKXS01000603.1 | 79123  | 0.06 |
| <i>H. impetiginosus</i> | NKXS01000610.1 | 16435  | 0.06 |
| <i>H. impetiginosus</i> | NKXS01000610.1 | 45217  | 0.06 |
| <i>H. impetiginosus</i> | NKXS01000610.1 | 45250  | 0.06 |
| <i>H. impetiginosus</i> | NKXS01000654.1 | 39177  | 0.06 |
| <i>H. impetiginosus</i> | NKXS01000655.1 | 56430  | 0.06 |
| <i>H. impetiginosus</i> | NKXS01000661.1 | 7452   | 0.06 |
| <i>H. impetiginosus</i> | NKXS01000676.1 | 9028   | 0.06 |
| <i>H. impetiginosus</i> | NKXS01000709.1 | 29720  | 0.06 |
| <i>H. impetiginosus</i> | NKXS01000709.1 | 33149  | 0.06 |
| <i>H. impetiginosus</i> | NKXS01000719.1 | 152935 | 0.06 |
| <i>H. impetiginosus</i> | NKXS01000719.1 | 152948 | 0.06 |
| <i>H. impetiginosus</i> | NKXS01000719.1 | 152974 | 0.06 |
| <i>H. impetiginosus</i> | NKXS01000719.1 | 152991 | 0.06 |
| <i>H. impetiginosus</i> | NKXS01000719.1 | 153012 | 0.06 |
| <i>H. impetiginosus</i> | NKXS01000719.1 | 153032 | 0.06 |
| <i>H. impetiginosus</i> | NKXS01000719.1 | 153148 | 0.06 |
| <i>H. impetiginosus</i> | NKXS01000719.1 | 153156 | 0.06 |
| <i>H. impetiginosus</i> | NKXS01000719.1 | 153185 | 0.06 |
| <i>H. impetiginosus</i> | NKXS01000777.1 | 8256   | 0.06 |
| <i>H. impetiginosus</i> | NKXS01000835.1 | 9006   | 0.06 |
| <i>H. impetiginosus</i> | NKXS01000844.1 | 50854  | 0.06 |
| <i>H. impetiginosus</i> | NKXS01000844.1 | 50863  | 0.06 |
| <i>H. impetiginosus</i> | NKXS01000844.1 | 51039  | 0.06 |
| <i>H. impetiginosus</i> | NKXS01000844.1 | 51044  | 0.06 |
| <i>H. impetiginosus</i> | NKXS01000852.1 | 102595 | 0.06 |
| <i>H. impetiginosus</i> | NKXS01000852.1 | 107393 | 0.06 |
| <i>H. impetiginosus</i> | NKXS01000871.1 | 100751 | 0.06 |
| <i>H. impetiginosus</i> | NKXS01000871.1 | 100794 | 0.06 |
| <i>H. impetiginosus</i> | NKXS01000871.1 | 100906 | 0.06 |
| <i>H. impetiginosus</i> | NKXS01000892.1 | 72872  | 0.06 |
| <i>H. impetiginosus</i> | NKXS01000893.1 | 75781  | 0.06 |
| <i>H. impetiginosus</i> | NKXS01000893.1 | 75803  | 0.06 |
| <i>H. impetiginosus</i> | NKXS01000893.1 | 75829  | 0.06 |
| <i>H. impetiginosus</i> | NKXS01000925.1 | 52979  | 0.06 |
| <i>H. impetiginosus</i> | NKXS01000950.1 | 36772  | 0.06 |
| <i>H. impetiginosus</i> | NKXS01000959.1 | 42529  | 0.06 |
| <i>H. impetiginosus</i> | NKXS01000959.1 | 42534  | 0.06 |

|                         |                |        |      |
|-------------------------|----------------|--------|------|
| <i>H. impetiginosus</i> | NKXS01000973.1 | 10866  | 0.06 |
| <i>H. impetiginosus</i> | NKXS01000992.1 | 42917  | 0.06 |
| <i>H. impetiginosus</i> | NKXS01001032.1 | 40487  | 0.06 |
| <i>H. impetiginosus</i> | NKXS01001041.1 | 8663   | 0.06 |
| <i>H. impetiginosus</i> | NKXS01001046.1 | 424    | 0.06 |
| <i>H. impetiginosus</i> | NKXS01001062.1 | 181632 | 0.06 |
| <i>H. impetiginosus</i> | NKXS01001074.1 | 401    | 0.06 |
| <i>H. impetiginosus</i> | NKXS01001074.1 | 414    | 0.06 |
| <i>H. impetiginosus</i> | NKXS01001078.1 | 10885  | 0.06 |
| <i>H. impetiginosus</i> | NKXS01001083.1 | 140211 | 0.06 |
| <i>H. impetiginosus</i> | NKXS01001127.1 | 45833  | 0.06 |
| <i>H. impetiginosus</i> | NKXS01001127.1 | 45867  | 0.06 |
| <i>H. impetiginosus</i> | NKXS01001150.1 | 121200 | 0.06 |
| <i>H. impetiginosus</i> | NKXS01001181.1 | 54843  | 0.06 |
| <i>H. impetiginosus</i> | NKXS01001189.1 | 63198  | 0.06 |
| <i>H. impetiginosus</i> | NKXS01001274.1 | 48379  | 0.06 |
| <i>H. impetiginosus</i> | NKXS01001274.1 | 48389  | 0.06 |
| <i>H. impetiginosus</i> | NKXS01001274.1 | 48419  | 0.06 |
| <i>H. impetiginosus</i> | NKXS01001300.1 | 37087  | 0.06 |
| <i>H. impetiginosus</i> | NKXS01001300.1 | 37164  | 0.06 |
| <i>H. impetiginosus</i> | NKXS01001314.1 | 64628  | 0.06 |
| <i>H. impetiginosus</i> | NKXS01001392.1 | 1869   | 0.06 |
| <i>H. impetiginosus</i> | NKXS01001419.1 | 51082  | 0.06 |
| <i>H. impetiginosus</i> | NKXS01001419.1 | 51233  | 0.06 |
| <i>H. impetiginosus</i> | NKXS01001423.1 | 85330  | 0.06 |
| <i>H. impetiginosus</i> | NKXS01001435.1 | 40091  | 0.06 |
| <i>H. impetiginosus</i> | NKXS01001440.1 | 145983 | 0.06 |
| <i>H. impetiginosus</i> | NKXS01001508.1 | 77918  | 0.06 |
| <i>H. impetiginosus</i> | NKXS01001508.1 | 78042  | 0.06 |
| <i>H. impetiginosus</i> | NKXS01001508.1 | 82145  | 0.06 |
| <i>H. impetiginosus</i> | NKXS01001511.1 | 41403  | 0.06 |
| <i>H. impetiginosus</i> | NKXS01001511.1 | 41524  | 0.06 |
| <i>H. impetiginosus</i> | NKXS01001511.1 | 41562  | 0.06 |
| <i>H. impetiginosus</i> | NKXS01001525.1 | 57181  | 0.06 |
| <i>H. impetiginosus</i> | NKXS01001533.1 | 19448  | 0.06 |
| <i>H. impetiginosus</i> | NKXS01001534.1 | 11167  | 0.06 |
| <i>H. impetiginosus</i> | NKXS01001534.1 | 11173  | 0.06 |
| <i>H. impetiginosus</i> | NKXS01001534.1 | 11344  | 0.06 |
| <i>H. impetiginosus</i> | NKXS01001577.1 | 33983  | 0.06 |
| <i>H. impetiginosus</i> | NKXS01001597.1 | 30658  | 0.06 |
| <i>H. impetiginosus</i> | NKXS01001642.1 | 76015  | 0.06 |
| <i>H. impetiginosus</i> | NKXS01001642.1 | 76049  | 0.06 |
| <i>H. impetiginosus</i> | NKXS01001642.1 | 76062  | 0.06 |
| <i>H. impetiginosus</i> | NKXS01001701.1 | 62507  | 0.06 |

|                         |                |        |      |
|-------------------------|----------------|--------|------|
| <i>H. impetiginosus</i> | NKXS01001771.1 | 98518  | 0.06 |
| <i>H. impetiginosus</i> | NKXS01001772.1 | 106445 | 0.06 |
| <i>H. impetiginosus</i> | NKXS01001772.1 | 106539 | 0.06 |
| <i>H. impetiginosus</i> | NKXS01001873.1 | 643    | 0.06 |
| <i>H. impetiginosus</i> | NKXS01001919.1 | 10973  | 0.06 |
| <i>H. impetiginosus</i> | NKXS01001924.1 | 105194 | 0.06 |
| <i>H. impetiginosus</i> | NKXS01001961.1 | 4506   | 0.06 |
| <i>H. impetiginosus</i> | NKXS01001972.1 | 59265  | 0.06 |
| <i>H. impetiginosus</i> | NKXS01001972.1 | 100390 | 0.06 |
| <i>H. impetiginosus</i> | NKXS01001979.1 | 10357  | 0.06 |
| <i>H. impetiginosus</i> | NKXS01001987.1 | 141132 | 0.06 |
| <i>H. impetiginosus</i> | NKXS01002071.1 | 83506  | 0.06 |
| <i>H. impetiginosus</i> | NKXS01002122.1 | 125113 | 0.06 |
| <i>H. impetiginosus</i> | NKXS01002166.1 | 77188  | 0.06 |
| <i>H. impetiginosus</i> | NKXS01002166.1 | 77221  | 0.06 |
| <i>H. impetiginosus</i> | NKXS01002166.1 | 77434  | 0.06 |
| <i>H. impetiginosus</i> | NKXS01002182.1 | 1927   | 0.06 |
| <i>H. impetiginosus</i> | NKXS01002182.1 | 2019   | 0.06 |
| <i>H. impetiginosus</i> | NKXS01002213.1 | 35379  | 0.06 |
| <i>H. impetiginosus</i> | NKXS01002213.1 | 35484  | 0.06 |
| <i>H. impetiginosus</i> | NKXS01002213.1 | 35567  | 0.06 |
| <i>H. impetiginosus</i> | NKXS01002232.1 | 13216  | 0.06 |
| <i>H. impetiginosus</i> | NKXS01002232.1 | 13259  | 0.06 |
| <i>H. impetiginosus</i> | NKXS01002248.1 | 71747  | 0.06 |
| <i>H. impetiginosus</i> | NKXS01002276.1 | 90348  | 0.06 |
| <i>H. impetiginosus</i> | NKXS01002278.1 | 21257  | 0.06 |
| <i>H. impetiginosus</i> | NKXS01002278.1 | 21259  | 0.06 |
| <i>H. impetiginosus</i> | NKXS01002342.1 | 96772  | 0.06 |
| <i>H. impetiginosus</i> | NKXS01002352.1 | 42818  | 0.06 |
| <i>H. impetiginosus</i> | NKXS01002396.1 | 10336  | 0.06 |
| <i>H. impetiginosus</i> | NKXS01002470.1 | 34938  | 0.06 |
| <i>H. impetiginosus</i> | NKXS01002491.1 | 116882 | 0.06 |
| <i>H. impetiginosus</i> | NKXS01002498.1 | 22769  | 0.06 |
| <i>H. impetiginosus</i> | NKXS01002512.1 | 58227  | 0.06 |
| <i>H. impetiginosus</i> | NKXS01002519.1 | 13549  | 0.06 |
| <i>H. impetiginosus</i> | NKXS01002519.1 | 13570  | 0.06 |
| <i>H. impetiginosus</i> | NKXS01002606.1 | 85127  | 0.06 |
| <i>H. impetiginosus</i> | NKXS01002622.1 | 48555  | 0.06 |
| <i>H. impetiginosus</i> | NKXS01002626.1 | 31671  | 0.06 |
| <i>H. impetiginosus</i> | NKXS01002674.1 | 44548  | 0.06 |
| <i>H. impetiginosus</i> | NKXS01002684.1 | 2913   | 0.06 |
| <i>H. impetiginosus</i> | NKXS01002705.1 | 210494 | 0.06 |
| <i>H. impetiginosus</i> | NKXS01002716.1 | 14782  | 0.06 |
| <i>H. impetiginosus</i> | NKXS01002717.1 | 252    | 0.06 |

|                         |                |        |      |
|-------------------------|----------------|--------|------|
| <i>H. impetiginosus</i> | NKXS01002728.1 | 47794  | 0.06 |
| <i>H. impetiginosus</i> | NKXS01002742.1 | 432    | 0.06 |
| <i>H. impetiginosus</i> | NKXS01002747.1 | 38072  | 0.06 |
| <i>H. impetiginosus</i> | NKXS01002747.1 | 39252  | 0.06 |
| <i>H. impetiginosus</i> | NKXS01002747.1 | 39261  | 0.06 |
| <i>H. impetiginosus</i> | NKXS01002749.1 | 93703  | 0.06 |
| <i>H. impetiginosus</i> | NKXS01002756.1 | 44760  | 0.06 |
| <i>H. impetiginosus</i> | NKXS01002822.1 | 10357  | 0.06 |
| <i>H. impetiginosus</i> | NKXS01002843.1 | 79211  | 0.06 |
| <i>H. impetiginosus</i> | NKXS01002873.1 | 106751 | 0.06 |
| <i>H. impetiginosus</i> | NKXS01002873.1 | 106759 | 0.06 |
| <i>H. impetiginosus</i> | NKXS01002938.1 | 10183  | 0.06 |
| <i>H. impetiginosus</i> | NKXS01002955.1 | 69125  | 0.06 |
| <i>H. impetiginosus</i> | NKXS01003004.1 | 76457  | 0.06 |
| <i>H. impetiginosus</i> | NKXS01003007.1 | 76284  | 0.06 |
| <i>H. impetiginosus</i> | NKXS01003105.1 | 56412  | 0.06 |
| <i>H. impetiginosus</i> | NKXS01003105.1 | 56434  | 0.06 |
| <i>H. impetiginosus</i> | NKXS01003275.1 | 40401  | 0.06 |
| <i>H. impetiginosus</i> | NKXS01003275.1 | 40501  | 0.06 |
| <i>H. impetiginosus</i> | NKXS01003275.1 | 40511  | 0.06 |
| <i>H. impetiginosus</i> | NKXS01003278.1 | 59745  | 0.06 |
| <i>H. impetiginosus</i> | NKXS01003278.1 | 59770  | 0.06 |
| <i>H. impetiginosus</i> | NKXS01003278.1 | 59778  | 0.06 |
| <i>H. impetiginosus</i> | NKXS01003278.1 | 59803  | 0.06 |
| <i>H. impetiginosus</i> | NKXS01003278.1 | 62005  | 0.06 |
| <i>H. impetiginosus</i> | NKXS01003278.1 | 62012  | 0.06 |
| <i>H. impetiginosus</i> | NKXS01003278.1 | 62071  | 0.06 |
| <i>H. impetiginosus</i> | NKXS01003292.1 | 28138  | 0.06 |
| <i>H. impetiginosus</i> | NKXS01003344.1 | 24407  | 0.06 |
| <i>H. impetiginosus</i> | NKXS01003406.1 | 54446  | 0.06 |
| <i>H. impetiginosus</i> | NKXS01003418.1 | 65461  | 0.06 |
| <i>H. impetiginosus</i> | NKXS01003418.1 | 65467  | 0.06 |
| <i>H. impetiginosus</i> | NKXS01003474.1 | 55861  | 0.06 |
| <i>H. impetiginosus</i> | NKXS01003521.1 | 11301  | 0.06 |
| <i>H. impetiginosus</i> | NKXS01003578.1 | 54014  | 0.06 |
| <i>H. impetiginosus</i> | NKXS01003719.1 | 70862  | 0.06 |
| <i>H. impetiginosus</i> | NKXS01003849.1 | 35990  | 0.06 |
| <i>H. impetiginosus</i> | NKXS01003854.1 | 25075  | 0.06 |
| <i>H. impetiginosus</i> | NKXS01003854.1 | 25164  | 0.06 |
| <i>H. impetiginosus</i> | NKXS01003854.1 | 25235  | 0.06 |
| <i>H. impetiginosus</i> | NKXS01003854.1 | 25262  | 0.06 |
| <i>H. impetiginosus</i> | NKXS01003888.1 | 39661  | 0.06 |
| <i>H. impetiginosus</i> | NKXS01003955.1 | 38763  | 0.06 |
| <i>H. impetiginosus</i> | NKXS01003960.1 | 47014  | 0.06 |

|                         |                |        |      |
|-------------------------|----------------|--------|------|
| <i>H. impetiginosus</i> | NKXS01003972.1 | 46494  | 0.06 |
| <i>H. impetiginosus</i> | NKXS01003972.1 | 46607  | 0.06 |
| <i>H. impetiginosus</i> | NKXS01004000.1 | 103441 | 0.06 |
| <i>H. impetiginosus</i> | NKXS01004055.1 | 8064   | 0.06 |
| <i>H. impetiginosus</i> | NKXS01004098.1 | 31699  | 0.06 |
| <i>H. impetiginosus</i> | NKXS01004098.1 | 31771  | 0.06 |
| <i>H. impetiginosus</i> | NKXS01004098.1 | 32447  | 0.06 |
| <i>H. impetiginosus</i> | NKXS01004098.1 | 32516  | 0.06 |
| <i>H. impetiginosus</i> | NKXS01004162.1 | 36527  | 0.06 |
| <i>H. impetiginosus</i> | NKXS01004162.1 | 36529  | 0.06 |
| <i>H. impetiginosus</i> | NKXS01004162.1 | 36535  | 0.06 |
| <i>H. impetiginosus</i> | NKXS01004162.1 | 36560  | 0.06 |
| <i>H. impetiginosus</i> | NKXS01004162.1 | 36581  | 0.06 |
| <i>H. impetiginosus</i> | NKXS01004162.1 | 36632  | 0.06 |
| <i>H. impetiginosus</i> | NKXS01004162.1 | 36642  | 0.06 |
| <i>H. impetiginosus</i> | NKXS01004162.1 | 36748  | 0.06 |
| <i>H. impetiginosus</i> | NKXS01004247.1 | 38766  | 0.06 |
| <i>H. impetiginosus</i> | NKXS01004311.1 | 23493  | 0.06 |
| <i>H. impetiginosus</i> | NKXS01004381.1 | 56424  | 0.06 |
| <i>H. impetiginosus</i> | NKXS01004394.1 | 21828  | 0.06 |
| <i>H. impetiginosus</i> | NKXS01004420.1 | 24517  | 0.06 |
| <i>H. impetiginosus</i> | NKXS01004448.1 | 16821  | 0.06 |
| <i>H. impetiginosus</i> | NKXS01004469.1 | 18946  | 0.06 |
| <i>H. impetiginosus</i> | NKXS01004469.1 | 18978  | 0.06 |
| <i>H. impetiginosus</i> | NKXS01004469.1 | 19023  | 0.06 |
| <i>H. impetiginosus</i> | NKXS01004469.1 | 19144  | 0.06 |
| <i>H. impetiginosus</i> | NKXS01004469.1 | 19180  | 0.06 |
| <i>H. impetiginosus</i> | NKXS01004473.1 | 7131   | 0.06 |
| <i>H. impetiginosus</i> | NKXS01004473.1 | 7228   | 0.06 |
| <i>H. impetiginosus</i> | NKXS01004485.1 | 30234  | 0.06 |
| <i>H. impetiginosus</i> | NKXS01004510.1 | 16454  | 0.06 |
| <i>H. impetiginosus</i> | NKXS01004510.1 | 16466  | 0.06 |
| <i>H. impetiginosus</i> | NKXS01004510.1 | 16532  | 0.06 |
| <i>H. impetiginosus</i> | NKXS01004510.1 | 16569  | 0.06 |
| <i>H. impetiginosus</i> | NKXS01004510.1 | 16593  | 0.06 |
| <i>H. impetiginosus</i> | NKXS01004510.1 | 16687  | 0.06 |
| <i>H. impetiginosus</i> | NKXS01004510.1 | 16689  | 0.06 |
| <i>H. impetiginosus</i> | NKXS01004570.1 | 17297  | 0.06 |
| <i>H. impetiginosus</i> | NKXS01004590.1 | 10038  | 0.06 |
| <i>H. impetiginosus</i> | NKXS01004620.1 | 9914   | 0.06 |
| <i>H. impetiginosus</i> | NKXS01004620.1 | 9933   | 0.06 |
| <i>H. impetiginosus</i> | NKXS01004620.1 | 9979   | 0.06 |
| <i>H. impetiginosus</i> | NKXS01004620.1 | 10011  | 0.06 |
| <i>H. impetiginosus</i> | NKXS01004639.1 | 12304  | 0.06 |



|                         |                |       |      |
|-------------------------|----------------|-------|------|
| <i>H. impetiginosus</i> | NKXS01004736.1 | 28300 | 0.06 |
| <i>H. impetiginosus</i> | NKXS01004803.1 | 22854 | 0.06 |
| <i>H. impetiginosus</i> | NKXS01004803.1 | 23006 | 0.06 |
| <i>H. impetiginosus</i> | NKXS01004804.1 | 16894 | 0.06 |
| <i>H. impetiginosus</i> | NKXS01004812.1 | 29502 | 0.06 |
| <i>H. impetiginosus</i> | NKXS01004812.1 | 29505 | 0.06 |
| <i>H. impetiginosus</i> | NKXS01004812.1 | 29513 | 0.06 |
| <i>H. impetiginosus</i> | NKXS01004822.1 | 16467 | 0.06 |
| <i>H. impetiginosus</i> | NKXS01004913.1 | 56607 | 0.06 |
| <i>H. impetiginosus</i> | NKXS01004944.1 | 45203 | 0.06 |
| <i>H. impetiginosus</i> | NKXS01004944.1 | 45206 | 0.06 |
| <i>H. impetiginosus</i> | NKXS01004962.1 | 44177 | 0.06 |
| <i>H. impetiginosus</i> | NKXS01005003.1 | 9324  | 0.06 |
| <i>H. impetiginosus</i> | NKXS01005019.1 | 50069 | 0.06 |
| <i>H. impetiginosus</i> | NKXS01005047.1 | 13770 | 0.06 |
| <i>H. impetiginosus</i> | NKXS01005050.1 | 54715 | 0.06 |
| <i>H. impetiginosus</i> | NKXS01005050.1 | 54759 | 0.06 |
| <i>H. impetiginosus</i> | NKXS01005059.1 | 34928 | 0.06 |
| <i>H. impetiginosus</i> | NKXS01005059.1 | 35143 | 0.06 |
| <i>H. impetiginosus</i> | NKXS01005176.1 | 22756 | 0.06 |
| <i>H. impetiginosus</i> | NKXS01005247.1 | 15699 | 0.06 |
| <i>H. impetiginosus</i> | NKXS01005264.1 | 998   | 0.06 |
| <i>H. impetiginosus</i> | NKXS01005264.1 | 1086  | 0.06 |
| <i>H. impetiginosus</i> | NKXS01005269.1 | 24505 | 0.06 |
| <i>H. impetiginosus</i> | NKXS01005269.1 | 24575 | 0.06 |
| <i>H. impetiginosus</i> | NKXS01005269.1 | 24672 | 0.06 |
| <i>H. impetiginosus</i> | NKXS01005274.1 | 19230 | 0.06 |
| <i>H. impetiginosus</i> | NKXS01005275.1 | 34492 | 0.06 |
| <i>H. impetiginosus</i> | NKXS01005322.1 | 16392 | 0.06 |
| <i>H. impetiginosus</i> | NKXS01005381.1 | 14798 | 0.06 |
| <i>H. impetiginosus</i> | NKXS01005381.1 | 16136 | 0.06 |
| <i>H. impetiginosus</i> | NKXS01005381.1 | 16187 | 0.06 |
| <i>H. impetiginosus</i> | NKXS01005413.1 | 36162 | 0.06 |
| <i>H. impetiginosus</i> | NKXS01005511.1 | 6675  | 0.06 |
| <i>H. impetiginosus</i> | NKXS01005600.1 | 49794 | 0.06 |
| <i>H. impetiginosus</i> | NKXS01005698.1 | 37742 | 0.06 |
| <i>H. impetiginosus</i> | NKXS01005698.1 | 37857 | 0.06 |
| <i>H. impetiginosus</i> | NKXS01005704.1 | 22612 | 0.06 |
| <i>H. impetiginosus</i> | NKXS01005719.1 | 18875 | 0.06 |
| <i>H. impetiginosus</i> | NKXS01005789.1 | 10680 | 0.06 |
| <i>H. impetiginosus</i> | NKXS01005823.1 | 33999 | 0.06 |
| <i>H. impetiginosus</i> | NKXS01005878.1 | 32893 | 0.06 |
| <i>H. impetiginosus</i> | NKXS01005878.1 | 32923 | 0.06 |
| <i>H. impetiginosus</i> | NKXS01005902.1 | 4698  | 0.06 |

|                         |                |       |      |
|-------------------------|----------------|-------|------|
| <i>H. impetiginosus</i> | NKXS01005933.1 | 49740 | 0.06 |
| <i>H. impetiginosus</i> | NKXS01005950.1 | 12223 | 0.06 |
| <i>H. impetiginosus</i> | NKXS01005998.1 | 41284 | 0.06 |
| <i>H. impetiginosus</i> | NKXS01006000.1 | 40721 | 0.06 |
| <i>H. impetiginosus</i> | NKXS01006032.1 | 12498 | 0.06 |
| <i>H. impetiginosus</i> | NKXS01006060.1 | 61876 | 0.06 |
| <i>H. impetiginosus</i> | NKXS01006078.1 | 22262 | 0.06 |
| <i>H. impetiginosus</i> | NKXS01006095.1 | 48663 | 0.06 |
| <i>H. impetiginosus</i> | NKXS01006096.1 | 20432 | 0.06 |
| <i>H. impetiginosus</i> | NKXS01006150.1 | 23465 | 0.06 |
| <i>H. impetiginosus</i> | NKXS01006155.1 | 29047 | 0.06 |
| <i>H. impetiginosus</i> | NKXS01006185.1 | 33296 | 0.06 |
| <i>H. impetiginosus</i> | NKXS01006185.1 | 35261 | 0.06 |
| <i>H. impetiginosus</i> | NKXS01006201.1 | 20099 | 0.06 |
| <i>H. impetiginosus</i> | NKXS01006250.1 | 18313 | 0.06 |
| <i>H. impetiginosus</i> | NKXS01006250.1 | 19023 | 0.06 |
| <i>H. impetiginosus</i> | NKXS01006303.1 | 33307 | 0.06 |
| <i>H. impetiginosus</i> | NKXS01006314.1 | 62707 | 0.06 |
| <i>H. impetiginosus</i> | NKXS01006381.1 | 24054 | 0.06 |
| <i>H. impetiginosus</i> | NKXS01006381.1 | 24139 | 0.06 |
| <i>H. impetiginosus</i> | NKXS01006381.1 | 24258 | 0.06 |
| <i>H. impetiginosus</i> | NKXS01006381.1 | 24282 | 0.06 |
| <i>H. impetiginosus</i> | NKXS01006381.1 | 24286 | 0.06 |
| <i>H. impetiginosus</i> | NKXS01006438.1 | 29639 | 0.06 |
| <i>H. impetiginosus</i> | NKXS01006465.1 | 25483 | 0.06 |
| <i>H. impetiginosus</i> | NKXS01006500.1 | 14777 | 0.06 |
| <i>H. impetiginosus</i> | NKXS01006517.1 | 4326  | 0.06 |
| <i>H. impetiginosus</i> | NKXS01006543.1 | 32390 | 0.06 |
| <i>H. impetiginosus</i> | NKXS01006626.1 | 21659 | 0.06 |
| <i>H. impetiginosus</i> | NKXS01006658.1 | 7651  | 0.06 |
| <i>H. impetiginosus</i> | NKXS01006679.1 | 1655  | 0.06 |
| <i>H. impetiginosus</i> | NKXS01006714.1 | 10422 | 0.06 |
| <i>H. impetiginosus</i> | NKXS01006719.1 | 24919 | 0.06 |
| <i>H. impetiginosus</i> | NKXS01006719.1 | 24999 | 0.06 |
| <i>H. impetiginosus</i> | NKXS01006752.1 | 5511  | 0.06 |
| <i>H. impetiginosus</i> | NKXS01006781.1 | 8752  | 0.06 |
| <i>H. impetiginosus</i> | NKXS01006802.1 | 2613  | 0.06 |
| <i>H. impetiginosus</i> | NKXS01006802.1 | 2695  | 0.06 |
| <i>H. impetiginosus</i> | NKXS01006855.1 | 15402 | 0.06 |
| <i>H. impetiginosus</i> | NKXS01006855.1 | 16827 | 0.06 |
| <i>H. impetiginosus</i> | NKXS01006999.1 | 12754 | 0.06 |
| <i>H. impetiginosus</i> | NKXS01007005.1 | 10181 | 0.06 |
| <i>H. impetiginosus</i> | NKXS01007005.1 | 10426 | 0.06 |
| <i>H. impetiginosus</i> | NKXS01007119.1 | 46670 | 0.06 |

|                         |                |       |      |
|-------------------------|----------------|-------|------|
| <i>H. impetiginosus</i> | NKXS01007121.1 | 8795  | 0.06 |
| <i>H. impetiginosus</i> | NKXS01007175.1 | 24759 | 0.06 |
| <i>H. impetiginosus</i> | NKXS01007252.1 | 2647  | 0.06 |
| <i>H. impetiginosus</i> | NKXS01007365.1 | 4217  | 0.06 |
| <i>H. impetiginosus</i> | NKXS01007365.1 | 4262  | 0.06 |
| <i>H. impetiginosus</i> | NKXS01007454.1 | 10898 | 0.06 |
| <i>H. impetiginosus</i> | NKXS01007543.1 | 9133  | 0.06 |
| <i>H. impetiginosus</i> | NKXS01007689.1 | 10473 | 0.06 |
| <i>H. impetiginosus</i> | NKXS01007797.1 | 24373 | 0.06 |
| <i>H. impetiginosus</i> | NKXS01007844.1 | 14112 | 0.06 |
| <i>H. impetiginosus</i> | NKXS01007844.1 | 14247 | 0.06 |
| <i>H. impetiginosus</i> | NKXS01007910.1 | 14224 | 0.06 |
| <i>H. impetiginosus</i> | NKXS01007910.1 | 14272 | 0.06 |
| <i>H. impetiginosus</i> | NKXS01007910.1 | 15617 | 0.06 |
| <i>H. impetiginosus</i> | NKXS01008129.1 | 10276 | 0.06 |
| <i>H. impetiginosus</i> | NKXS01008197.1 | 13498 | 0.06 |
| <i>H. impetiginosus</i> | NKXS01008197.1 | 13694 | 0.06 |
| <i>H. impetiginosus</i> | NKXS01008197.1 | 13752 | 0.06 |
| <i>H. impetiginosus</i> | NKXS01008197.1 | 13780 | 0.06 |
| <i>H. impetiginosus</i> | NKXS01008421.1 | 12049 | 0.06 |
| <i>H. impetiginosus</i> | NKXS01008421.1 | 12056 | 0.06 |
| <i>H. impetiginosus</i> | NKXS01008421.1 | 12091 | 0.06 |
| <i>H. impetiginosus</i> | NKXS01008421.1 | 12102 | 0.06 |
| <i>H. impetiginosus</i> | NKXS01008421.1 | 12106 | 0.06 |
| <i>H. impetiginosus</i> | NKXS01008453.1 | 10534 | 0.06 |
| <i>H. impetiginosus</i> | NKXS01008530.1 | 16933 | 0.06 |
| <i>H. impetiginosus</i> | NKXS01008565.1 | 17348 | 0.06 |
| <i>H. impetiginosus</i> | NKXS01008571.1 | 4736  | 0.06 |
| <i>H. impetiginosus</i> | NKXS01008571.1 | 4749  | 0.06 |
| <i>H. impetiginosus</i> | NKXS01008571.1 | 4772  | 0.06 |
| <i>H. impetiginosus</i> | NKXS01008699.1 | 2859  | 0.06 |
| <i>H. impetiginosus</i> | NKXS01008732.1 | 5835  | 0.06 |
| <i>H. impetiginosus</i> | NKXS01008896.1 | 9357  | 0.06 |
| <i>H. impetiginosus</i> | NKXS01008924.1 | 271   | 0.06 |
| <i>H. impetiginosus</i> | NKXS01008935.1 | 9730  | 0.06 |
| <i>H. impetiginosus</i> | NKXS01008955.1 | 13754 | 0.06 |
| <i>H. impetiginosus</i> | NKXS01008955.1 | 13826 | 0.06 |
| <i>H. impetiginosus</i> | NKXS01009104.1 | 10303 | 0.06 |
| <i>H. impetiginosus</i> | NKXS01009104.1 | 10350 | 0.06 |
| <i>H. impetiginosus</i> | NKXS01009104.1 | 10370 | 0.06 |
| <i>H. impetiginosus</i> | NKXS01009104.1 | 10383 | 0.06 |
| <i>H. impetiginosus</i> | NKXS01009104.1 | 10452 | 0.06 |
| <i>H. impetiginosus</i> | NKXS01009107.1 | 8017  | 0.06 |
| <i>H. impetiginosus</i> | NKXS01009120.1 | 6846  | 0.06 |

|                         |                |      |      |
|-------------------------|----------------|------|------|
| <i>H. impetiginosus</i> | NKXS01009120.1 | 7037 | 0.06 |
| <i>H. impetiginosus</i> | NKXS01009399.1 | 7479 | 0.06 |
| <i>H. impetiginosus</i> | NKXS01009409.1 | 4773 | 0.06 |
| <i>H. impetiginosus</i> | NKXS01009493.1 | 4845 | 0.06 |
| <i>H. impetiginosus</i> | NKXS01009493.1 | 4974 | 0.06 |
| <i>H. impetiginosus</i> | NKXS01009604.1 | 5467 | 0.06 |
| <i>H. impetiginosus</i> | NKXS01009604.1 | 5528 | 0.06 |
| <i>H. impetiginosus</i> | NKXS01009757.1 | 2196 | 0.06 |
| <i>H. impetiginosus</i> | NKXS01009989.1 | 5080 | 0.06 |
| <i>H. impetiginosus</i> | NKXS01009989.1 | 5105 | 0.06 |
| <i>H. impetiginosus</i> | NKXS01009989.1 | 5157 | 0.06 |
| <i>H. impetiginosus</i> | NKXS01009989.1 | 5236 | 0.06 |
| <i>H. impetiginosus</i> | NKXS01009989.1 | 5238 | 0.06 |
| <i>H. impetiginosus</i> | NKXS01010123.1 | 2924 | 0.06 |
| <i>H. impetiginosus</i> | NKXS01010411.1 | 4208 | 0.06 |
| <i>H. impetiginosus</i> | NKXS01012523.1 | 761  | 0.06 |
| <i>H. impetiginosus</i> | NKXS01012523.1 | 820  | 0.06 |
| <i>H. impetiginosus</i> | NKXS01012523.1 | 926  | 0.06 |

---
