# Supplementary material for: Identification of Commercial Cultivars in the Tabebuia Alliance Using Genotyping-by-Sequencing
Source: MDPI journal article supplement (doi:10.3390/f14020271), 2023-01-31
Supplement: s1 [file s1]

**Table S2.** High-quality loci could be used for distinguish different species in each group

| Scaffolds      | Position | Available                                         |
|----------------|----------|---------------------------------------------------|
| NKXS01000709.1 | 29595    | <i>H. chrysanthus</i> VS <i>H. chrysotrichus</i>  |
| NKXS01002815.1 | 44459    | <i>H. chrysanthus</i> VS <i>H. chrysotrichus</i>  |
| NKXS01004763.1 | 23293    | <i>H. chrysanthus</i> VS <i>H. chrysotrichus</i>  |
| NKXS01000003.1 | 6121     | <i>H. impetiginosus</i> VS <i>H. heptaphyllus</i> |
| NKXS01000003.1 | 6136     | <i>H. impetiginosus</i> VS <i>H. heptaphyllus</i> |
| NKXS01000079.1 | 44645    | <i>H. impetiginosus</i> VS <i>H. heptaphyllus</i> |
| NKXS01000159.1 | 109307   | <i>H. impetiginosus</i> VS <i>H. heptaphyllus</i> |
| NKXS01000198.1 | 48247    | <i>H. impetiginosus</i> VS <i>H. heptaphyllus</i> |
| NKXS01000198.1 | 48294    | <i>H. impetiginosus</i> VS <i>H. heptaphyllus</i> |
| NKXS01000198.1 | 48302    | <i>H. impetiginosus</i> VS <i>H. heptaphyllus</i> |
| NKXS01000236.1 | 9111     | <i>H. impetiginosus</i> VS <i>H. heptaphyllus</i> |
| NKXS01000238.1 | 134353   | <i>H. impetiginosus</i> VS <i>H. heptaphyllus</i> |
| NKXS01000238.1 | 134368   | <i>H. impetiginosus</i> VS <i>H. heptaphyllus</i> |
| NKXS01000238.1 | 134372   | <i>H. impetiginosus</i> VS <i>H. heptaphyllus</i> |
| NKXS01000238.1 | 134520   | <i>H. impetiginosus</i> VS <i>H. heptaphyllus</i> |
| NKXS01000257.1 | 25739    | <i>H. impetiginosus</i> VS <i>H. heptaphyllus</i> |
| NKXS01000257.1 | 25780    | <i>H. impetiginosus</i> VS <i>H. heptaphyllus</i> |
| NKXS01000257.1 | 25982    | <i>H. impetiginosus</i> VS <i>H. heptaphyllus</i> |
| NKXS01000269.1 | 50642    | <i>H. impetiginosus</i> VS <i>H. heptaphyllus</i> |
| NKXS01000379.1 | 27585    | <i>H. impetiginosus</i> VS <i>H. heptaphyllus</i> |
| NKXS01000410.1 | 47341    | <i>H. impetiginosus</i> VS <i>H. heptaphyllus</i> |
| NKXS01000437.1 | 5921     | <i>H. impetiginosus</i> VS <i>H. heptaphyllus</i> |
| NKXS01000437.1 | 5950     | <i>H. impetiginosus</i> VS <i>H. heptaphyllus</i> |
| NKXS01000437.1 | 6097     | <i>H. impetiginosus</i> VS <i>H. heptaphyllus</i> |
| NKXS01000437.1 | 6129     | <i>H. impetiginosus</i> VS <i>H. heptaphyllus</i> |
| NKXS01000454.1 | 122018   | <i>H. impetiginosus</i> VS <i>H. heptaphyllus</i> |
| NKXS01000546.1 | 25243    | <i>H. impetiginosus</i> VS <i>H. heptaphyllus</i> |
| NKXS01000600.1 | 280503   | <i>H. impetiginosus</i> VS <i>H. heptaphyllus</i> |
| NKXS01000655.1 | 56429    | <i>H. impetiginosus</i> VS <i>H. heptaphyllus</i> |
| NKXS01000655.1 | 56540    | <i>H. impetiginosus</i> VS <i>H. heptaphyllus</i> |
| NKXS01000655.1 | 56542    | <i>H. impetiginosus</i> VS <i>H. heptaphyllus</i> |
| NKXS01000655.1 | 56617    | <i>H. impetiginosus</i> VS <i>H. heptaphyllus</i> |
| NKXS01000655.1 | 56640    | <i>H. impetiginosus</i> VS <i>H. heptaphyllus</i> |
| NKXS01000662.1 | 149585   | <i>H. impetiginosus</i> VS <i>H. heptaphyllus</i> |
| NKXS01000662.1 | 149629   | <i>H. impetiginosus</i> VS <i>H. heptaphyllus</i> |
| NKXS01000733.1 | 6902     | <i>H. impetiginosus</i> VS <i>H. heptaphyllus</i> |
| NKXS01000733.1 | 91105    | <i>H. impetiginosus</i> VS <i>H. heptaphyllus</i> |
| NKXS01000777.1 | 8176     | <i>H. impetiginosus</i> VS <i>H. heptaphyllus</i> |
| NKXS01000777.1 | 8178     | <i>H. impetiginosus</i> VS <i>H. heptaphyllus</i> |
| NKXS01000777.1 | 8201     | <i>H. impetiginosus</i> VS <i>H. heptaphyllus</i> |
| NKXS01000777.1 | 8326     | <i>H. impetiginosus</i> VS <i>H. heptaphyllus</i> |

|                |        |                                                   |
|----------------|--------|---------------------------------------------------|
| NKXS01000892.1 | 72696  | <i>H. impetiginosus</i> VS <i>H. heptaphyllus</i> |
| NKXS01000892.1 | 72889  | <i>H. impetiginosus</i> VS <i>H. heptaphyllus</i> |
| NKXS01000931.1 | 113530 | <i>H. impetiginosus</i> VS <i>H. heptaphyllus</i> |
| NKXS01001083.1 | 140067 | <i>H. impetiginosus</i> VS <i>H. heptaphyllus</i> |
| NKXS01001083.1 | 140199 | <i>H. impetiginosus</i> VS <i>H. heptaphyllus</i> |
| NKXS01001085.1 | 110073 | <i>H. impetiginosus</i> VS <i>H. heptaphyllus</i> |
| NKXS01001134.1 | 14614  | <i>H. impetiginosus</i> VS <i>H. heptaphyllus</i> |
| NKXS01001193.1 | 1141   | <i>H. impetiginosus</i> VS <i>H. heptaphyllus</i> |
| NKXS01001306.1 | 61314  | <i>H. impetiginosus</i> VS <i>H. heptaphyllus</i> |
| NKXS01001306.1 | 61326  | <i>H. impetiginosus</i> VS <i>H. heptaphyllus</i> |
| NKXS01001306.1 | 61453  | <i>H. impetiginosus</i> VS <i>H. heptaphyllus</i> |
| NKXS01001369.1 | 148947 | <i>H. impetiginosus</i> VS <i>H. heptaphyllus</i> |
| NKXS01001369.1 | 149003 | <i>H. impetiginosus</i> VS <i>H. heptaphyllus</i> |
| NKXS01001483.1 | 30397  | <i>H. impetiginosus</i> VS <i>H. heptaphyllus</i> |
| NKXS01001614.1 | 9549   | <i>H. impetiginosus</i> VS <i>H. heptaphyllus</i> |
| NKXS01001614.1 | 9718   | <i>H. impetiginosus</i> VS <i>H. heptaphyllus</i> |
| NKXS01001621.1 | 54761  | <i>H. impetiginosus</i> VS <i>H. heptaphyllus</i> |
| NKXS01001642.1 | 75964  | <i>H. impetiginosus</i> VS <i>H. heptaphyllus</i> |
| NKXS01001668.1 | 27157  | <i>H. impetiginosus</i> VS <i>H. heptaphyllus</i> |
| NKXS01001755.1 | 55408  | <i>H. impetiginosus</i> VS <i>H. heptaphyllus</i> |
| NKXS01001802.1 | 12115  | <i>H. impetiginosus</i> VS <i>H. heptaphyllus</i> |
| NKXS01001898.1 | 22898  | <i>H. impetiginosus</i> VS <i>H. heptaphyllus</i> |
| NKXS01002066.1 | 20349  | <i>H. impetiginosus</i> VS <i>H. heptaphyllus</i> |
| NKXS01002099.1 | 84520  | <i>H. impetiginosus</i> VS <i>H. heptaphyllus</i> |
| NKXS01002099.1 | 84541  | <i>H. impetiginosus</i> VS <i>H. heptaphyllus</i> |
| NKXS01002126.1 | 81187  | <i>H. impetiginosus</i> VS <i>H. heptaphyllus</i> |
| NKXS01002126.1 | 81200  | <i>H. impetiginosus</i> VS <i>H. heptaphyllus</i> |
| NKXS01002126.1 | 81204  | <i>H. impetiginosus</i> VS <i>H. heptaphyllus</i> |
| NKXS01002126.1 | 81249  | <i>H. impetiginosus</i> VS <i>H. heptaphyllus</i> |
| NKXS01002126.1 | 81267  | <i>H. impetiginosus</i> VS <i>H. heptaphyllus</i> |
| NKXS01002126.1 | 81300  | <i>H. impetiginosus</i> VS <i>H. heptaphyllus</i> |
| NKXS01002126.1 | 81313  | <i>H. impetiginosus</i> VS <i>H. heptaphyllus</i> |
| NKXS01002126.1 | 81325  | <i>H. impetiginosus</i> VS <i>H. heptaphyllus</i> |
| NKXS01002126.1 | 81411  | <i>H. impetiginosus</i> VS <i>H. heptaphyllus</i> |
| NKXS01002249.1 | 65391  | <i>H. impetiginosus</i> VS <i>H. heptaphyllus</i> |
| NKXS01002249.1 | 65400  | <i>H. impetiginosus</i> VS <i>H. heptaphyllus</i> |
| NKXS01002249.1 | 65456  | <i>H. impetiginosus</i> VS <i>H. heptaphyllus</i> |
| NKXS01002352.1 | 42790  | <i>H. impetiginosus</i> VS <i>H. heptaphyllus</i> |
| NKXS01002352.1 | 42860  | <i>H. impetiginosus</i> VS <i>H. heptaphyllus</i> |
| NKXS01002352.1 | 42863  | <i>H. impetiginosus</i> VS <i>H. heptaphyllus</i> |
| NKXS01002684.1 | 2878   | <i>H. impetiginosus</i> VS <i>H. heptaphyllus</i> |
| NKXS01002684.1 | 2899   | <i>H. impetiginosus</i> VS <i>H. heptaphyllus</i> |
| NKXS01002705.1 | 111816 | <i>H. impetiginosus</i> VS <i>H. heptaphyllus</i> |
| NKXS01002705.1 | 111877 | <i>H. impetiginosus</i> VS <i>H. heptaphyllus</i> |

|                |       |                                                   |
|----------------|-------|---------------------------------------------------|
| NKXS01002823.1 | 68948 | <i>H. impetiginosus</i> VS <i>H. heptaphyllus</i> |
| NKXS01002938.1 | 53024 | <i>H. impetiginosus</i> VS <i>H. heptaphyllus</i> |
| NKXS01002941.1 | 14389 | <i>H. impetiginosus</i> VS <i>H. heptaphyllus</i> |
| NKXS01002941.1 | 14416 | <i>H. impetiginosus</i> VS <i>H. heptaphyllus</i> |
| NKXS01003142.1 | 55098 | <i>H. impetiginosus</i> VS <i>H. heptaphyllus</i> |
| NKXS01003142.1 | 55186 | <i>H. impetiginosus</i> VS <i>H. heptaphyllus</i> |
| NKXS01003142.1 | 55266 | <i>H. impetiginosus</i> VS <i>H. heptaphyllus</i> |
| NKXS01003480.1 | 9463  | <i>H. impetiginosus</i> VS <i>H. heptaphyllus</i> |
| NKXS01003545.1 | 33556 | <i>H. impetiginosus</i> VS <i>H. heptaphyllus</i> |
| NKXS01003545.1 | 33571 | <i>H. impetiginosus</i> VS <i>H. heptaphyllus</i> |
| NKXS01003794.1 | 34672 | <i>H. impetiginosus</i> VS <i>H. heptaphyllus</i> |
| NKXS01003823.1 | 44826 | <i>H. impetiginosus</i> VS <i>H. heptaphyllus</i> |
| NKXS01003929.1 | 51142 | <i>H. impetiginosus</i> VS <i>H. heptaphyllus</i> |
| NKXS01003929.1 | 51247 | <i>H. impetiginosus</i> VS <i>H. heptaphyllus</i> |
| NKXS01003956.1 | 23827 | <i>H. impetiginosus</i> VS <i>H. heptaphyllus</i> |
| NKXS01003984.1 | 39578 | <i>H. impetiginosus</i> VS <i>H. heptaphyllus</i> |
| NKXS01004170.1 | 49013 | <i>H. impetiginosus</i> VS <i>H. heptaphyllus</i> |
| NKXS01004175.1 | 36477 | <i>H. impetiginosus</i> VS <i>H. heptaphyllus</i> |
| NKXS01004175.1 | 36550 | <i>H. impetiginosus</i> VS <i>H. heptaphyllus</i> |
| NKXS01004324.1 | 24796 | <i>H. impetiginosus</i> VS <i>H. heptaphyllus</i> |
| NKXS01004324.1 | 24829 | <i>H. impetiginosus</i> VS <i>H. heptaphyllus</i> |
| NKXS01004324.1 | 24856 | <i>H. impetiginosus</i> VS <i>H. heptaphyllus</i> |
| NKXS01004324.1 | 24973 | <i>H. impetiginosus</i> VS <i>H. heptaphyllus</i> |
| NKXS01004324.1 | 24994 | <i>H. impetiginosus</i> VS <i>H. heptaphyllus</i> |
| NKXS01004324.1 | 25064 | <i>H. impetiginosus</i> VS <i>H. heptaphyllus</i> |
| NKXS01004543.1 | 43799 | <i>H. impetiginosus</i> VS <i>H. heptaphyllus</i> |
| NKXS01004658.1 | 19988 | <i>H. impetiginosus</i> VS <i>H. heptaphyllus</i> |
| NKXS01004756.1 | 15578 | <i>H. impetiginosus</i> VS <i>H. heptaphyllus</i> |
| NKXS01004756.1 | 15600 | <i>H. impetiginosus</i> VS <i>H. heptaphyllus</i> |
| NKXS01005165.1 | 33580 | <i>H. impetiginosus</i> VS <i>H. heptaphyllus</i> |
| NKXS01005273.1 | 31358 | <i>H. impetiginosus</i> VS <i>H. heptaphyllus</i> |
| NKXS01005457.1 | 40636 | <i>H. impetiginosus</i> VS <i>H. heptaphyllus</i> |
| NKXS01005511.1 | 6592  | <i>H. impetiginosus</i> VS <i>H. heptaphyllus</i> |
| NKXS01005539.1 | 27429 | <i>H. impetiginosus</i> VS <i>H. heptaphyllus</i> |
| NKXS01005789.1 | 10664 | <i>H. impetiginosus</i> VS <i>H. heptaphyllus</i> |
| NKXS01005969.1 | 11167 | <i>H. impetiginosus</i> VS <i>H. heptaphyllus</i> |
| NKXS01005969.1 | 11305 | <i>H. impetiginosus</i> VS <i>H. heptaphyllus</i> |
| NKXS01005969.1 | 11310 | <i>H. impetiginosus</i> VS <i>H. heptaphyllus</i> |
| NKXS01005969.1 | 11372 | <i>H. impetiginosus</i> VS <i>H. heptaphyllus</i> |
| NKXS01006000.1 | 40739 | <i>H. impetiginosus</i> VS <i>H. heptaphyllus</i> |
| NKXS01006289.1 | 3133  | <i>H. impetiginosus</i> VS <i>H. heptaphyllus</i> |
| NKXS01006490.1 | 30350 | <i>H. impetiginosus</i> VS <i>H. heptaphyllus</i> |
| NKXS01006731.1 | 29263 | <i>H. impetiginosus</i> VS <i>H. heptaphyllus</i> |
| NKXS01006739.1 | 20514 | <i>H. impetiginosus</i> VS <i>H. heptaphyllus</i> |

|                |        |                                                   |
|----------------|--------|---------------------------------------------------|
| NKXS01006739.1 | 20650  | <i>H. impetiginosus</i> VS <i>H. heptaphyllus</i> |
| NKXS01006752.1 | 5596   | <i>H. impetiginosus</i> VS <i>H. heptaphyllus</i> |
| NKXS01007188.1 | 20393  | <i>H. impetiginosus</i> VS <i>H. heptaphyllus</i> |
| NKXS01007405.1 | 25391  | <i>H. impetiginosus</i> VS <i>H. heptaphyllus</i> |
| NKXS01007427.1 | 9487   | <i>H. impetiginosus</i> VS <i>H. heptaphyllus</i> |
| NKXS01007427.1 | 9699   | <i>H. impetiginosus</i> VS <i>H. heptaphyllus</i> |
| NKXS01007454.1 | 10745  | <i>H. impetiginosus</i> VS <i>H. heptaphyllus</i> |
| NKXS01007454.1 | 10791  | <i>H. impetiginosus</i> VS <i>H. heptaphyllus</i> |
| NKXS01007454.1 | 10795  | <i>H. impetiginosus</i> VS <i>H. heptaphyllus</i> |
| NKXS01007455.1 | 15195  | <i>H. impetiginosus</i> VS <i>H. heptaphyllus</i> |
| NKXS01007455.1 | 15398  | <i>H. impetiginosus</i> VS <i>H. heptaphyllus</i> |
| NKXS01008073.1 | 8657   | <i>H. impetiginosus</i> VS <i>H. heptaphyllus</i> |
| NKXS01008073.1 | 8783   | <i>H. impetiginosus</i> VS <i>H. heptaphyllus</i> |
| NKXS01008073.1 | 8792   | <i>H. impetiginosus</i> VS <i>H. heptaphyllus</i> |
| NKXS01008084.1 | 3543   | <i>H. impetiginosus</i> VS <i>H. heptaphyllus</i> |
| NKXS01008084.1 | 3784   | <i>H. impetiginosus</i> VS <i>H. heptaphyllus</i> |
| NKXS01000051.1 | 32075  | <i>T. aurea</i> VS <i>T. rosea</i>                |
| NKXS01000051.1 | 32191  | <i>T. aurea</i> VS <i>T. rosea</i>                |
| NKXS01000051.1 | 32206  | <i>T. aurea</i> VS <i>T. rosea</i>                |
| NKXS01000134.1 | 17584  | <i>T. aurea</i> VS <i>T. rosea</i>                |
| NKXS01000134.1 | 17654  | <i>T. aurea</i> VS <i>T. rosea</i>                |
| NKXS01000134.1 | 17726  | <i>T. aurea</i> VS <i>T. rosea</i>                |
| NKXS01000134.1 | 17746  | <i>T. aurea</i> VS <i>T. rosea</i>                |
| NKXS01000134.1 | 17755  | <i>T. aurea</i> VS <i>T. rosea</i>                |
| NKXS01000186.1 | 147105 | <i>T. aurea</i> VS <i>T. rosea</i>                |
| NKXS01000186.1 | 147109 | <i>T. aurea</i> VS <i>T. rosea</i>                |
| NKXS01000186.1 | 147273 | <i>T. aurea</i> VS <i>T. rosea</i>                |
| NKXS01000186.1 | 147302 | <i>T. aurea</i> VS <i>T. rosea</i>                |
| NKXS01000186.1 | 147305 | <i>T. aurea</i> VS <i>T. rosea</i>                |
| NKXS01000321.1 | 84552  | <i>T. aurea</i> VS <i>T. rosea</i>                |
| NKXS01000321.1 | 84603  | <i>T. aurea</i> VS <i>T. rosea</i>                |
| NKXS01000324.1 | 31005  | <i>T. aurea</i> VS <i>T. rosea</i>                |
| NKXS01000371.1 | 62993  | <i>T. aurea</i> VS <i>T. rosea</i>                |
| NKXS01000410.1 | 47239  | <i>T. aurea</i> VS <i>T. rosea</i>                |
| NKXS01000410.1 | 47244  | <i>T. aurea</i> VS <i>T. rosea</i>                |
| NKXS01000410.1 | 47250  | <i>T. aurea</i> VS <i>T. rosea</i>                |
| NKXS01000410.1 | 47263  | <i>T. aurea</i> VS <i>T. rosea</i>                |
| NKXS01000410.1 | 47270  | <i>T. aurea</i> VS <i>T. rosea</i>                |
| NKXS01000410.1 | 47325  | <i>T. aurea</i> VS <i>T. rosea</i>                |
| NKXS01000410.1 | 47423  | <i>T. aurea</i> VS <i>T. rosea</i>                |
| NKXS01000410.1 | 47440  | <i>T. aurea</i> VS <i>T. rosea</i>                |
| NKXS01000415.1 | 85494  | <i>T. aurea</i> VS <i>T. rosea</i>                |
| NKXS01000437.1 | 5894   | <i>T. aurea</i> VS <i>T. rosea</i>                |
| NKXS01000437.1 | 5990   | <i>T. aurea</i> VS <i>T. rosea</i>                |

|                |        |                                    |
|----------------|--------|------------------------------------|
| NKXS01000437.1 | 5998   | <i>T. aurea</i> VS <i>T. rosea</i> |
| NKXS01000454.1 | 122108 | <i>T. aurea</i> VS <i>T. rosea</i> |
| NKXS01000454.1 | 122132 | <i>T. aurea</i> VS <i>T. rosea</i> |
| NKXS01000454.1 | 122209 | <i>T. aurea</i> VS <i>T. rosea</i> |
| NKXS01000484.1 | 137193 | <i>T. aurea</i> VS <i>T. rosea</i> |
| NKXS01000484.1 | 137218 | <i>T. aurea</i> VS <i>T. rosea</i> |
| NKXS01000484.1 | 137233 | <i>T. aurea</i> VS <i>T. rosea</i> |
| NKXS01000484.1 | 137307 | <i>T. aurea</i> VS <i>T. rosea</i> |
| NKXS01000484.1 | 137377 | <i>T. aurea</i> VS <i>T. rosea</i> |
| NKXS01000529.1 | 9998   | <i>T. aurea</i> VS <i>T. rosea</i> |
| NKXS01000529.1 | 10023  | <i>T. aurea</i> VS <i>T. rosea</i> |
| NKXS01000529.1 | 10033  | <i>T. aurea</i> VS <i>T. rosea</i> |
| NKXS01000529.1 | 10101  | <i>T. aurea</i> VS <i>T. rosea</i> |
| NKXS01000587.1 | 107254 | <i>T. aurea</i> VS <i>T. rosea</i> |
| NKXS01000587.1 | 107335 | <i>T. aurea</i> VS <i>T. rosea</i> |
| NKXS01000654.1 | 63337  | <i>T. aurea</i> VS <i>T. rosea</i> |
| NKXS01000654.1 | 63359  | <i>T. aurea</i> VS <i>T. rosea</i> |
| NKXS01000662.1 | 95754  | <i>T. aurea</i> VS <i>T. rosea</i> |
| NKXS01000662.1 | 95760  | <i>T. aurea</i> VS <i>T. rosea</i> |
| NKXS01000662.1 | 95766  | <i>T. aurea</i> VS <i>T. rosea</i> |
| NKXS01000662.1 | 95772  | <i>T. aurea</i> VS <i>T. rosea</i> |
| NKXS01000662.1 | 95815  | <i>T. aurea</i> VS <i>T. rosea</i> |
| NKXS01000662.1 | 95932  | <i>T. aurea</i> VS <i>T. rosea</i> |
| NKXS01000699.1 | 166168 | <i>T. aurea</i> VS <i>T. rosea</i> |
| NKXS01000699.1 | 166172 | <i>T. aurea</i> VS <i>T. rosea</i> |
| NKXS01000699.1 | 166238 | <i>T. aurea</i> VS <i>T. rosea</i> |
| NKXS01000699.1 | 166274 | <i>T. aurea</i> VS <i>T. rosea</i> |
| NKXS01000699.1 | 166276 | <i>T. aurea</i> VS <i>T. rosea</i> |
| NKXS01000699.1 | 166299 | <i>T. aurea</i> VS <i>T. rosea</i> |
| NKXS01000699.1 | 166334 | <i>T. aurea</i> VS <i>T. rosea</i> |
| NKXS01000699.1 | 166388 | <i>T. aurea</i> VS <i>T. rosea</i> |
| NKXS01000703.1 | 20958  | <i>T. aurea</i> VS <i>T. rosea</i> |
| NKXS01000703.1 | 21100  | <i>T. aurea</i> VS <i>T. rosea</i> |
| NKXS01000703.1 | 21155  | <i>T. aurea</i> VS <i>T. rosea</i> |
| NKXS01000703.1 | 36257  | <i>T. aurea</i> VS <i>T. rosea</i> |
| NKXS01000703.1 | 36268  | <i>T. aurea</i> VS <i>T. rosea</i> |
| NKXS01000703.1 | 36297  | <i>T. aurea</i> VS <i>T. rosea</i> |
| NKXS01000703.1 | 36303  | <i>T. aurea</i> VS <i>T. rosea</i> |
| NKXS01000703.1 | 36399  | <i>T. aurea</i> VS <i>T. rosea</i> |
| NKXS01000703.1 | 36452  | <i>T. aurea</i> VS <i>T. rosea</i> |
| NKXS01000733.1 | 6717   | <i>T. aurea</i> VS <i>T. rosea</i> |
| NKXS01000733.1 | 6752   | <i>T. aurea</i> VS <i>T. rosea</i> |
| NKXS01000733.1 | 6843   | <i>T. aurea</i> VS <i>T. rosea</i> |
| NKXS01000733.1 | 90916  | <i>T. aurea</i> VS <i>T. rosea</i> |

|                |        |                                    |
|----------------|--------|------------------------------------|
| NKXS01000733.1 | 90954  | <i>T. aurea</i> VS <i>T. rosea</i> |
| NKXS01000733.1 | 90964  | <i>T. aurea</i> VS <i>T. rosea</i> |
| NKXS01000733.1 | 90970  | <i>T. aurea</i> VS <i>T. rosea</i> |
| NKXS01000733.1 | 90973  | <i>T. aurea</i> VS <i>T. rosea</i> |
| NKXS01000733.1 | 91002  | <i>T. aurea</i> VS <i>T. rosea</i> |
| NKXS01000733.1 | 91005  | <i>T. aurea</i> VS <i>T. rosea</i> |
| NKXS01000733.1 | 91009  | <i>T. aurea</i> VS <i>T. rosea</i> |
| NKXS01000733.1 | 91015  | <i>T. aurea</i> VS <i>T. rosea</i> |
| NKXS01000733.1 | 91060  | <i>T. aurea</i> VS <i>T. rosea</i> |
| NKXS01000733.1 | 91094  | <i>T. aurea</i> VS <i>T. rosea</i> |
| NKXS01000733.1 | 91100  | <i>T. aurea</i> VS <i>T. rosea</i> |
| NKXS01000733.1 | 91123  | <i>T. aurea</i> VS <i>T. rosea</i> |
| NKXS01000733.1 | 91126  | <i>T. aurea</i> VS <i>T. rosea</i> |
| NKXS01000733.1 | 91130  | <i>T. aurea</i> VS <i>T. rosea</i> |
| NKXS01000777.1 | 8268   | <i>T. aurea</i> VS <i>T. rosea</i> |
| NKXS01000777.1 | 8289   | <i>T. aurea</i> VS <i>T. rosea</i> |
| NKXS01000777.1 | 8294   | <i>T. aurea</i> VS <i>T. rosea</i> |
| NKXS01000791.1 | 14569  | <i>T. aurea</i> VS <i>T. rosea</i> |
| NKXS01000791.1 | 14629  | <i>T. aurea</i> VS <i>T. rosea</i> |
| NKXS01000844.1 | 149552 | <i>T. aurea</i> VS <i>T. rosea</i> |
| NKXS01000844.1 | 149645 | <i>T. aurea</i> VS <i>T. rosea</i> |
| NKXS01000844.1 | 149689 | <i>T. aurea</i> VS <i>T. rosea</i> |
| NKXS01000844.1 | 149720 | <i>T. aurea</i> VS <i>T. rosea</i> |
| NKXS01000844.1 | 149774 | <i>T. aurea</i> VS <i>T. rosea</i> |
| NKXS01000850.1 | 126429 | <i>T. aurea</i> VS <i>T. rosea</i> |
| NKXS01000850.1 | 126449 | <i>T. aurea</i> VS <i>T. rosea</i> |
| NKXS01000850.1 | 126497 | <i>T. aurea</i> VS <i>T. rosea</i> |
| NKXS01000850.1 | 126561 | <i>T. aurea</i> VS <i>T. rosea</i> |
| NKXS01000871.1 | 130896 | <i>T. aurea</i> VS <i>T. rosea</i> |
| NKXS01000873.1 | 6725   | <i>T. aurea</i> VS <i>T. rosea</i> |
| NKXS01000873.1 | 6815   | <i>T. aurea</i> VS <i>T. rosea</i> |
| NKXS01000873.1 | 6853   | <i>T. aurea</i> VS <i>T. rosea</i> |
| NKXS01000873.1 | 6854   | <i>T. aurea</i> VS <i>T. rosea</i> |
| NKXS01000873.1 | 6874   | <i>T. aurea</i> VS <i>T. rosea</i> |
| NKXS01000891.1 | 36053  | <i>T. aurea</i> VS <i>T. rosea</i> |
| NKXS01000891.1 | 36074  | <i>T. aurea</i> VS <i>T. rosea</i> |
| NKXS01000891.1 | 36113  | <i>T. aurea</i> VS <i>T. rosea</i> |
| NKXS01000891.1 | 36172  | <i>T. aurea</i> VS <i>T. rosea</i> |
| NKXS01000891.1 | 36265  | <i>T. aurea</i> VS <i>T. rosea</i> |
| NKXS01000891.1 | 36269  | <i>T. aurea</i> VS <i>T. rosea</i> |
| NKXS01000893.1 | 147334 | <i>T. aurea</i> VS <i>T. rosea</i> |
| NKXS01000893.1 | 147415 | <i>T. aurea</i> VS <i>T. rosea</i> |
| NKXS01000893.1 | 147434 | <i>T. aurea</i> VS <i>T. rosea</i> |
| NKXS01000905.1 | 17287  | <i>T. aurea</i> VS <i>T. rosea</i> |

|                |       |                                    |
|----------------|-------|------------------------------------|
| NKXS01000905.1 | 17305 | <i>T. aurea</i> VS <i>T. rosea</i> |
| NKXS01000905.1 | 17358 | <i>T. aurea</i> VS <i>T. rosea</i> |
| NKXS01000952.1 | 76504 | <i>T. aurea</i> VS <i>T. rosea</i> |
| NKXS01000952.1 | 76522 | <i>T. aurea</i> VS <i>T. rosea</i> |
| NKXS01000952.1 | 76603 | <i>T. aurea</i> VS <i>T. rosea</i> |
| NKXS01000952.1 | 76676 | <i>T. aurea</i> VS <i>T. rosea</i> |
| NKXS01001049.1 | 72142 | <i>T. aurea</i> VS <i>T. rosea</i> |
| NKXS01001049.1 | 72247 | <i>T. aurea</i> VS <i>T. rosea</i> |
| NKXS01001049.1 | 72322 | <i>T. aurea</i> VS <i>T. rosea</i> |
| NKXS01001049.1 | 72339 | <i>T. aurea</i> VS <i>T. rosea</i> |
| NKXS01001059.1 | 98451 | <i>T. aurea</i> VS <i>T. rosea</i> |
| NKXS01001108.1 | 29102 | <i>T. aurea</i> VS <i>T. rosea</i> |
| NKXS01001108.1 | 29136 | <i>T. aurea</i> VS <i>T. rosea</i> |
| NKXS01001108.1 | 29173 | <i>T. aurea</i> VS <i>T. rosea</i> |
| NKXS01001108.1 | 29185 | <i>T. aurea</i> VS <i>T. rosea</i> |
| NKXS01001108.1 | 29282 | <i>T. aurea</i> VS <i>T. rosea</i> |
| NKXS01001108.1 | 29367 | <i>T. aurea</i> VS <i>T. rosea</i> |
| NKXS01001108.1 | 29368 | <i>T. aurea</i> VS <i>T. rosea</i> |
| NKXS01001134.1 | 14404 | <i>T. aurea</i> VS <i>T. rosea</i> |
| NKXS01001134.1 | 14612 | <i>T. aurea</i> VS <i>T. rosea</i> |
| NKXS01001170.1 | 1035  | <i>T. aurea</i> VS <i>T. rosea</i> |
| NKXS01001193.1 | 1150  | <i>T. aurea</i> VS <i>T. rosea</i> |
| NKXS01001193.1 | 1164  | <i>T. aurea</i> VS <i>T. rosea</i> |
| NKXS01001193.1 | 1228  | <i>T. aurea</i> VS <i>T. rosea</i> |
| NKXS01001193.1 | 1231  | <i>T. aurea</i> VS <i>T. rosea</i> |
| NKXS01001193.1 | 1285  | <i>T. aurea</i> VS <i>T. rosea</i> |
| NKXS01001193.1 | 1339  | <i>T. aurea</i> VS <i>T. rosea</i> |
| NKXS01001193.1 | 1362  | <i>T. aurea</i> VS <i>T. rosea</i> |
| NKXS01001220.1 | 40550 | <i>T. aurea</i> VS <i>T. rosea</i> |
| NKXS01001220.1 | 40565 | <i>T. aurea</i> VS <i>T. rosea</i> |
| NKXS01001220.1 | 40679 | <i>T. aurea</i> VS <i>T. rosea</i> |
| NKXS01001220.1 | 40717 | <i>T. aurea</i> VS <i>T. rosea</i> |
| NKXS01001220.1 | 40723 | <i>T. aurea</i> VS <i>T. rosea</i> |
| NKXS01001220.1 | 40728 | <i>T. aurea</i> VS <i>T. rosea</i> |
| NKXS01001222.1 | 8638  | <i>T. aurea</i> VS <i>T. rosea</i> |
| NKXS01001222.1 | 8677  | <i>T. aurea</i> VS <i>T. rosea</i> |
| NKXS01001222.1 | 8707  | <i>T. aurea</i> VS <i>T. rosea</i> |
| NKXS01001252.1 | 93743 | <i>T. aurea</i> VS <i>T. rosea</i> |
| NKXS01001252.1 | 93791 | <i>T. aurea</i> VS <i>T. rosea</i> |
| NKXS01001252.1 | 93800 | <i>T. aurea</i> VS <i>T. rosea</i> |
| NKXS01001252.1 | 93812 | <i>T. aurea</i> VS <i>T. rosea</i> |
| NKXS01001252.1 | 93861 | <i>T. aurea</i> VS <i>T. rosea</i> |
| NKXS01001252.1 | 93896 | <i>T. aurea</i> VS <i>T. rosea</i> |
| NKXS01001293.1 | 75738 | <i>T. aurea</i> VS <i>T. rosea</i> |

|                |        |                                    |
|----------------|--------|------------------------------------|
| NKXS01001293.1 | 75783  | <i>T. aurea</i> VS <i>T. rosea</i> |
| NKXS01001293.1 | 75859  | <i>T. aurea</i> VS <i>T. rosea</i> |
| NKXS01001293.1 | 75864  | <i>T. aurea</i> VS <i>T. rosea</i> |
| NKXS01001293.1 | 75907  | <i>T. aurea</i> VS <i>T. rosea</i> |
| NKXS01001293.1 | 75912  | <i>T. aurea</i> VS <i>T. rosea</i> |
| NKXS01001325.1 | 168666 | <i>T. aurea</i> VS <i>T. rosea</i> |
| NKXS01001325.1 | 168794 | <i>T. aurea</i> VS <i>T. rosea</i> |
| NKXS01001325.1 | 168798 | <i>T. aurea</i> VS <i>T. rosea</i> |
| NKXS01001325.1 | 168861 | <i>T. aurea</i> VS <i>T. rosea</i> |
| NKXS01001325.1 | 168873 | <i>T. aurea</i> VS <i>T. rosea</i> |
| NKXS01001325.1 | 168882 | <i>T. aurea</i> VS <i>T. rosea</i> |
| NKXS01001325.1 | 168910 | <i>T. aurea</i> VS <i>T. rosea</i> |
| NKXS01001328.1 | 60416  | <i>T. aurea</i> VS <i>T. rosea</i> |
| NKXS01001328.1 | 60631  | <i>T. aurea</i> VS <i>T. rosea</i> |
| NKXS01001329.1 | 96303  | <i>T. aurea</i> VS <i>T. rosea</i> |
| NKXS01001329.1 | 96360  | <i>T. aurea</i> VS <i>T. rosea</i> |
| NKXS01001329.1 | 96423  | <i>T. aurea</i> VS <i>T. rosea</i> |
| NKXS01001329.1 | 96435  | <i>T. aurea</i> VS <i>T. rosea</i> |
| NKXS01001369.1 | 149078 | <i>T. aurea</i> VS <i>T. rosea</i> |
| NKXS01001369.1 | 149114 | <i>T. aurea</i> VS <i>T. rosea</i> |
| NKXS01001369.1 | 149135 | <i>T. aurea</i> VS <i>T. rosea</i> |
| NKXS01001466.1 | 147752 | <i>T. aurea</i> VS <i>T. rosea</i> |
| NKXS01001466.1 | 147778 | <i>T. aurea</i> VS <i>T. rosea</i> |
| NKXS01001466.1 | 147794 | <i>T. aurea</i> VS <i>T. rosea</i> |
| NKXS01001469.1 | 93394  | <i>T. aurea</i> VS <i>T. rosea</i> |
| NKXS01001469.1 | 93400  | <i>T. aurea</i> VS <i>T. rosea</i> |
| NKXS01001469.1 | 93422  | <i>T. aurea</i> VS <i>T. rosea</i> |
| NKXS01001501.1 | 9097   | <i>T. aurea</i> VS <i>T. rosea</i> |
| NKXS01001501.1 | 9136   | <i>T. aurea</i> VS <i>T. rosea</i> |
| NKXS01001501.1 | 9295   | <i>T. aurea</i> VS <i>T. rosea</i> |
| NKXS01001680.1 | 10121  | <i>T. aurea</i> VS <i>T. rosea</i> |
| NKXS01001777.1 | 28540  | <i>T. aurea</i> VS <i>T. rosea</i> |
| NKXS01001777.1 | 28740  | <i>T. aurea</i> VS <i>T. rosea</i> |
| NKXS01001789.1 | 32896  | <i>T. aurea</i> VS <i>T. rosea</i> |
| NKXS01001789.1 | 32911  | <i>T. aurea</i> VS <i>T. rosea</i> |
| NKXS01001789.1 | 33022  | <i>T. aurea</i> VS <i>T. rosea</i> |
| NKXS01001789.1 | 33043  | <i>T. aurea</i> VS <i>T. rosea</i> |
| NKXS01001802.1 | 12115  | <i>T. aurea</i> VS <i>T. rosea</i> |
| NKXS01001851.1 | 31966  | <i>T. aurea</i> VS <i>T. rosea</i> |
| NKXS01001851.1 | 32029  | <i>T. aurea</i> VS <i>T. rosea</i> |
| NKXS01001851.1 | 32084  | <i>T. aurea</i> VS <i>T. rosea</i> |
| NKXS01001851.1 | 32092  | <i>T. aurea</i> VS <i>T. rosea</i> |
| NKXS01001851.1 | 32101  | <i>T. aurea</i> VS <i>T. rosea</i> |
| NKXS01001851.1 | 32156  | <i>T. aurea</i> VS <i>T. rosea</i> |



|                |        |                                    |
|----------------|--------|------------------------------------|
| NKXS01001857.1 | 31160  | <i>T. aurea</i> VS <i>T. rosea</i> |
| NKXS01001857.1 | 31219  | <i>T. aurea</i> VS <i>T. rosea</i> |
| NKXS01001857.1 | 31228  | <i>T. aurea</i> VS <i>T. rosea</i> |
| NKXS01001857.1 | 31306  | <i>T. aurea</i> VS <i>T. rosea</i> |
| NKXS01001857.1 | 31309  | <i>T. aurea</i> VS <i>T. rosea</i> |
| NKXS01001857.1 | 31316  | <i>T. aurea</i> VS <i>T. rosea</i> |
| NKXS01001857.1 | 31347  | <i>T. aurea</i> VS <i>T. rosea</i> |
| NKXS01001857.1 | 31389  | <i>T. aurea</i> VS <i>T. rosea</i> |
| NKXS01001987.1 | 141011 | <i>T. aurea</i> VS <i>T. rosea</i> |
| NKXS01001987.1 | 141020 | <i>T. aurea</i> VS <i>T. rosea</i> |
| NKXS01001987.1 | 141068 | <i>T. aurea</i> VS <i>T. rosea</i> |
| NKXS01001987.1 | 141122 | <i>T. aurea</i> VS <i>T. rosea</i> |
| NKXS01001987.1 | 141129 | <i>T. aurea</i> VS <i>T. rosea</i> |
| NKXS01001987.1 | 141155 | <i>T. aurea</i> VS <i>T. rosea</i> |
| NKXS01001987.1 | 141158 | <i>T. aurea</i> VS <i>T. rosea</i> |
| NKXS01002045.1 | 60994  | <i>T. aurea</i> VS <i>T. rosea</i> |
| NKXS01002045.1 | 61062  | <i>T. aurea</i> VS <i>T. rosea</i> |
| NKXS01002045.1 | 61103  | <i>T. aurea</i> VS <i>T. rosea</i> |
| NKXS01002045.1 | 61122  | <i>T. aurea</i> VS <i>T. rosea</i> |
| NKXS01002045.1 | 61132  | <i>T. aurea</i> VS <i>T. rosea</i> |
| NKXS01002045.1 | 61141  | <i>T. aurea</i> VS <i>T. rosea</i> |
| NKXS01002066.1 | 20307  | <i>T. aurea</i> VS <i>T. rosea</i> |
| NKXS01002066.1 | 20325  | <i>T. aurea</i> VS <i>T. rosea</i> |
| NKXS01002066.1 | 20402  | <i>T. aurea</i> VS <i>T. rosea</i> |
| NKXS01002066.1 | 20463  | <i>T. aurea</i> VS <i>T. rosea</i> |
| NKXS01002066.1 | 20490  | <i>T. aurea</i> VS <i>T. rosea</i> |
| NKXS01002066.1 | 20527  | <i>T. aurea</i> VS <i>T. rosea</i> |
| NKXS01002101.1 | 48777  | <i>T. aurea</i> VS <i>T. rosea</i> |
| NKXS01002126.1 | 81159  | <i>T. aurea</i> VS <i>T. rosea</i> |
| NKXS01002126.1 | 81177  | <i>T. aurea</i> VS <i>T. rosea</i> |
| NKXS01002126.1 | 81201  | <i>T. aurea</i> VS <i>T. rosea</i> |
| NKXS01002126.1 | 81204  | <i>T. aurea</i> VS <i>T. rosea</i> |
| NKXS01002126.1 | 81221  | <i>T. aurea</i> VS <i>T. rosea</i> |
| NKXS01002126.1 | 81230  | <i>T. aurea</i> VS <i>T. rosea</i> |
| NKXS01002126.1 | 81342  | <i>T. aurea</i> VS <i>T. rosea</i> |
| NKXS01002126.1 | 81344  | <i>T. aurea</i> VS <i>T. rosea</i> |
| NKXS01002126.1 | 81348  | <i>T. aurea</i> VS <i>T. rosea</i> |
| NKXS01002126.1 | 81361  | <i>T. aurea</i> VS <i>T. rosea</i> |
| NKXS01002126.1 | 81366  | <i>T. aurea</i> VS <i>T. rosea</i> |
| NKXS01002126.1 | 81384  | <i>T. aurea</i> VS <i>T. rosea</i> |
| NKXS01002126.1 | 81414  | <i>T. aurea</i> VS <i>T. rosea</i> |
| NKXS01002126.1 | 81420  | <i>T. aurea</i> VS <i>T. rosea</i> |
| NKXS01002196.1 | 20258  | <i>T. aurea</i> VS <i>T. rosea</i> |
| NKXS01002196.1 | 20276  | <i>T. aurea</i> VS <i>T. rosea</i> |

|                |        |                                    |
|----------------|--------|------------------------------------|
| NKXS01002213.1 | 35473  | <i>T. aurea</i> VS <i>T. rosea</i> |
| NKXS01002228.1 | 87252  | <i>T. aurea</i> VS <i>T. rosea</i> |
| NKXS01002228.1 | 87272  | <i>T. aurea</i> VS <i>T. rosea</i> |
| NKXS01002228.1 | 87407  | <i>T. aurea</i> VS <i>T. rosea</i> |
| NKXS01002276.1 | 83615  | <i>T. aurea</i> VS <i>T. rosea</i> |
| NKXS01002276.1 | 83638  | <i>T. aurea</i> VS <i>T. rosea</i> |
| NKXS01002282.1 | 35932  | <i>T. aurea</i> VS <i>T. rosea</i> |
| NKXS01002282.1 | 36101  | <i>T. aurea</i> VS <i>T. rosea</i> |
| NKXS01002282.1 | 36136  | <i>T. aurea</i> VS <i>T. rosea</i> |
| NKXS01002301.1 | 30777  | <i>T. aurea</i> VS <i>T. rosea</i> |
| NKXS01002382.1 | 64882  | <i>T. aurea</i> VS <i>T. rosea</i> |
| NKXS01002382.1 | 64906  | <i>T. aurea</i> VS <i>T. rosea</i> |
| NKXS01002382.1 | 64999  | <i>T. aurea</i> VS <i>T. rosea</i> |
| NKXS01002382.1 | 65062  | <i>T. aurea</i> VS <i>T. rosea</i> |
| NKXS01002382.1 | 65074  | <i>T. aurea</i> VS <i>T. rosea</i> |
| NKXS01002382.1 | 65131  | <i>T. aurea</i> VS <i>T. rosea</i> |
| NKXS01002382.1 | 65139  | <i>T. aurea</i> VS <i>T. rosea</i> |
| NKXS01002402.1 | 105243 | <i>T. aurea</i> VS <i>T. rosea</i> |
| NKXS01002411.1 | 90606  | <i>T. aurea</i> VS <i>T. rosea</i> |
| NKXS01002411.1 | 90663  | <i>T. aurea</i> VS <i>T. rosea</i> |
| NKXS01002411.1 | 90694  | <i>T. aurea</i> VS <i>T. rosea</i> |
| NKXS01002411.1 | 90763  | <i>T. aurea</i> VS <i>T. rosea</i> |
| NKXS01002495.1 | 10707  | <i>T. aurea</i> VS <i>T. rosea</i> |
| NKXS01002561.1 | 2193   | <i>T. aurea</i> VS <i>T. rosea</i> |
| NKXS01002561.1 | 2373   | <i>T. aurea</i> VS <i>T. rosea</i> |
| NKXS01002593.1 | 84425  | <i>T. aurea</i> VS <i>T. rosea</i> |
| NKXS01002616.1 | 41909  | <i>T. aurea</i> VS <i>T. rosea</i> |
| NKXS01002616.1 | 42015  | <i>T. aurea</i> VS <i>T. rosea</i> |
| NKXS01002626.1 | 37777  | <i>T. aurea</i> VS <i>T. rosea</i> |
| NKXS01002626.1 | 37786  | <i>T. aurea</i> VS <i>T. rosea</i> |
| NKXS01002626.1 | 37792  | <i>T. aurea</i> VS <i>T. rosea</i> |
| NKXS01002626.1 | 37876  | <i>T. aurea</i> VS <i>T. rosea</i> |
| NKXS01002626.1 | 37879  | <i>T. aurea</i> VS <i>T. rosea</i> |
| NKXS01002626.1 | 37897  | <i>T. aurea</i> VS <i>T. rosea</i> |
| NKXS01002626.1 | 38034  | <i>T. aurea</i> VS <i>T. rosea</i> |
| NKXS01002631.1 | 5014   | <i>T. aurea</i> VS <i>T. rosea</i> |
| NKXS01002631.1 | 5049   | <i>T. aurea</i> VS <i>T. rosea</i> |
| NKXS01002631.1 | 5096   | <i>T. aurea</i> VS <i>T. rosea</i> |
| NKXS01002631.1 | 5175   | <i>T. aurea</i> VS <i>T. rosea</i> |
| NKXS01002674.1 | 43534  | <i>T. aurea</i> VS <i>T. rosea</i> |
| NKXS01002674.1 | 43541  | <i>T. aurea</i> VS <i>T. rosea</i> |
| NKXS01002675.1 | 67018  | <i>T. aurea</i> VS <i>T. rosea</i> |
| NKXS01002675.1 | 67041  | <i>T. aurea</i> VS <i>T. rosea</i> |
| NKXS01002675.1 | 67120  | <i>T. aurea</i> VS <i>T. rosea</i> |

|                |        |                                    |
|----------------|--------|------------------------------------|
| NKXS01002675.1 | 67156  | <i>T. aurea</i> VS <i>T. rosea</i> |
| NKXS01002675.1 | 67210  | <i>T. aurea</i> VS <i>T. rosea</i> |
| NKXS01002675.1 | 67230  | <i>T. aurea</i> VS <i>T. rosea</i> |
| NKXS01002684.1 | 2838   | <i>T. aurea</i> VS <i>T. rosea</i> |
| NKXS01002684.1 | 2867   | <i>T. aurea</i> VS <i>T. rosea</i> |
| NKXS01002684.1 | 2913   | <i>T. aurea</i> VS <i>T. rosea</i> |
| NKXS01002684.1 | 2997   | <i>T. aurea</i> VS <i>T. rosea</i> |
| NKXS01002684.1 | 3017   | <i>T. aurea</i> VS <i>T. rosea</i> |
| NKXS01002705.1 | 111768 | <i>T. aurea</i> VS <i>T. rosea</i> |
| NKXS01002705.1 | 111911 | <i>T. aurea</i> VS <i>T. rosea</i> |
| NKXS01002705.1 | 111928 | <i>T. aurea</i> VS <i>T. rosea</i> |
| NKXS01002705.1 | 111957 | <i>T. aurea</i> VS <i>T. rosea</i> |
| NKXS01002744.1 | 77807  | <i>T. aurea</i> VS <i>T. rosea</i> |
| NKXS01002744.1 | 77843  | <i>T. aurea</i> VS <i>T. rosea</i> |
| NKXS01002744.1 | 77857  | <i>T. aurea</i> VS <i>T. rosea</i> |
| NKXS01002749.1 | 28494  | <i>T. aurea</i> VS <i>T. rosea</i> |
| NKXS01002749.1 | 28580  | <i>T. aurea</i> VS <i>T. rosea</i> |
| NKXS01002749.1 | 28602  | <i>T. aurea</i> VS <i>T. rosea</i> |
| NKXS01002749.1 | 28616  | <i>T. aurea</i> VS <i>T. rosea</i> |
| NKXS01002789.1 | 68231  | <i>T. aurea</i> VS <i>T. rosea</i> |
| NKXS01002789.1 | 68273  | <i>T. aurea</i> VS <i>T. rosea</i> |
| NKXS01002789.1 | 68384  | <i>T. aurea</i> VS <i>T. rosea</i> |
| NKXS01002789.1 | 68394  | <i>T. aurea</i> VS <i>T. rosea</i> |
| NKXS01002805.1 | 97962  | <i>T. aurea</i> VS <i>T. rosea</i> |
| NKXS01002805.1 | 98031  | <i>T. aurea</i> VS <i>T. rosea</i> |
| NKXS01002866.1 | 46265  | <i>T. aurea</i> VS <i>T. rosea</i> |
| NKXS01003056.1 | 67374  | <i>T. aurea</i> VS <i>T. rosea</i> |
| NKXS01003091.1 | 9409   | <i>T. aurea</i> VS <i>T. rosea</i> |
| NKXS01003091.1 | 9476   | <i>T. aurea</i> VS <i>T. rosea</i> |
| NKXS01003261.1 | 9378   | <i>T. aurea</i> VS <i>T. rosea</i> |
| NKXS01003261.1 | 9430   | <i>T. aurea</i> VS <i>T. rosea</i> |
| NKXS01003261.1 | 9511   | <i>T. aurea</i> VS <i>T. rosea</i> |
| NKXS01003261.1 | 9571   | <i>T. aurea</i> VS <i>T. rosea</i> |
| NKXS01003261.1 | 9580   | <i>T. aurea</i> VS <i>T. rosea</i> |
| NKXS01003281.1 | 76616  | <i>T. aurea</i> VS <i>T. rosea</i> |
| NKXS01003281.1 | 76627  | <i>T. aurea</i> VS <i>T. rosea</i> |
| NKXS01003281.1 | 76629  | <i>T. aurea</i> VS <i>T. rosea</i> |
| NKXS01003281.1 | 76663  | <i>T. aurea</i> VS <i>T. rosea</i> |
| NKXS01003281.1 | 76664  | <i>T. aurea</i> VS <i>T. rosea</i> |
| NKXS01003281.1 | 76668  | <i>T. aurea</i> VS <i>T. rosea</i> |
| NKXS01003281.1 | 76679  | <i>T. aurea</i> VS <i>T. rosea</i> |
| NKXS01003281.1 | 76713  | <i>T. aurea</i> VS <i>T. rosea</i> |
| NKXS01003281.1 | 76750  | <i>T. aurea</i> VS <i>T. rosea</i> |
| NKXS01003281.1 | 76852  | <i>T. aurea</i> VS <i>T. rosea</i> |

|                |       |                                    |
|----------------|-------|------------------------------------|
| NKXS01003364.1 | 6239  | <i>T. aurea</i> VS <i>T. rosea</i> |
| NKXS01003364.1 | 6359  | <i>T. aurea</i> VS <i>T. rosea</i> |
| NKXS01003364.1 | 6380  | <i>T. aurea</i> VS <i>T. rosea</i> |
| NKXS01003364.1 | 6410  | <i>T. aurea</i> VS <i>T. rosea</i> |
| NKXS01003377.1 | 32555 | <i>T. aurea</i> VS <i>T. rosea</i> |
| NKXS01003377.1 | 68970 | <i>T. aurea</i> VS <i>T. rosea</i> |
| NKXS01003377.1 | 69172 | <i>T. aurea</i> VS <i>T. rosea</i> |
| NKXS01003382.1 | 15093 | <i>T. aurea</i> VS <i>T. rosea</i> |
| NKXS01003382.1 | 15156 | <i>T. aurea</i> VS <i>T. rosea</i> |
| NKXS01003382.1 | 15195 | <i>T. aurea</i> VS <i>T. rosea</i> |
| NKXS01003382.1 | 15216 | <i>T. aurea</i> VS <i>T. rosea</i> |
| NKXS01003382.1 | 15358 | <i>T. aurea</i> VS <i>T. rosea</i> |
| NKXS01003406.1 | 54319 | <i>T. aurea</i> VS <i>T. rosea</i> |
| NKXS01003406.1 | 54331 | <i>T. aurea</i> VS <i>T. rosea</i> |
| NKXS01003418.1 | 65388 | <i>T. aurea</i> VS <i>T. rosea</i> |
| NKXS01003418.1 | 65486 | <i>T. aurea</i> VS <i>T. rosea</i> |
| NKXS01003418.1 | 65495 | <i>T. aurea</i> VS <i>T. rosea</i> |
| NKXS01003474.1 | 56063 | <i>T. aurea</i> VS <i>T. rosea</i> |
| NKXS01003474.1 | 56079 | <i>T. aurea</i> VS <i>T. rosea</i> |
| NKXS01003474.1 | 56081 | <i>T. aurea</i> VS <i>T. rosea</i> |
| NKXS01003474.1 | 56141 | <i>T. aurea</i> VS <i>T. rosea</i> |
| NKXS01003480.1 | 9389  | <i>T. aurea</i> VS <i>T. rosea</i> |
| NKXS01003480.1 | 9402  | <i>T. aurea</i> VS <i>T. rosea</i> |
| NKXS01003480.1 | 9403  | <i>T. aurea</i> VS <i>T. rosea</i> |
| NKXS01003480.1 | 9424  | <i>T. aurea</i> VS <i>T. rosea</i> |
| NKXS01003480.1 | 9433  | <i>T. aurea</i> VS <i>T. rosea</i> |
| NKXS01003480.1 | 9484  | <i>T. aurea</i> VS <i>T. rosea</i> |
| NKXS01003480.1 | 9495  | <i>T. aurea</i> VS <i>T. rosea</i> |
| NKXS01003480.1 | 9496  | <i>T. aurea</i> VS <i>T. rosea</i> |
| NKXS01003480.1 | 9571  | <i>T. aurea</i> VS <i>T. rosea</i> |
| NKXS01003480.1 | 9575  | <i>T. aurea</i> VS <i>T. rosea</i> |
| NKXS01003480.1 | 9596  | <i>T. aurea</i> VS <i>T. rosea</i> |
| NKXS01003480.1 | 9622  | <i>T. aurea</i> VS <i>T. rosea</i> |
| NKXS01003480.1 | 9631  | <i>T. aurea</i> VS <i>T. rosea</i> |
| NKXS01003480.1 | 9656  | <i>T. aurea</i> VS <i>T. rosea</i> |
| NKXS01003503.1 | 4296  | <i>T. aurea</i> VS <i>T. rosea</i> |
| NKXS01003645.1 | 11828 | <i>T. aurea</i> VS <i>T. rosea</i> |
| NKXS01003645.1 | 11858 | <i>T. aurea</i> VS <i>T. rosea</i> |
| NKXS01003645.1 | 11900 | <i>T. aurea</i> VS <i>T. rosea</i> |
| NKXS01003645.1 | 11926 | <i>T. aurea</i> VS <i>T. rosea</i> |
| NKXS01003645.1 | 12099 | <i>T. aurea</i> VS <i>T. rosea</i> |
| NKXS01003652.1 | 22176 | <i>T. aurea</i> VS <i>T. rosea</i> |
| NKXS01003707.1 | 24310 | <i>T. aurea</i> VS <i>T. rosea</i> |
| NKXS01003707.1 | 24361 | <i>T. aurea</i> VS <i>T. rosea</i> |

|                |       |                                    |
|----------------|-------|------------------------------------|
| NKXS01003707.1 | 24406 | <i>T. aurea</i> VS <i>T. rosea</i> |
| NKXS01003707.1 | 24413 | <i>T. aurea</i> VS <i>T. rosea</i> |
| NKXS01003707.1 | 24466 | <i>T. aurea</i> VS <i>T. rosea</i> |
| NKXS01003707.1 | 24540 | <i>T. aurea</i> VS <i>T. rosea</i> |
| NKXS01003707.1 | 24548 | <i>T. aurea</i> VS <i>T. rosea</i> |
| NKXS01003707.1 | 24550 | <i>T. aurea</i> VS <i>T. rosea</i> |
| NKXS01003775.1 | 20451 | <i>T. aurea</i> VS <i>T. rosea</i> |
| NKXS01003775.1 | 20472 | <i>T. aurea</i> VS <i>T. rosea</i> |
| NKXS01003775.1 | 20484 | <i>T. aurea</i> VS <i>T. rosea</i> |
| NKXS01003775.1 | 20505 | <i>T. aurea</i> VS <i>T. rosea</i> |
| NKXS01003775.1 | 20516 | <i>T. aurea</i> VS <i>T. rosea</i> |
| NKXS01003775.1 | 20631 | <i>T. aurea</i> VS <i>T. rosea</i> |
| NKXS01003876.1 | 40339 | <i>T. aurea</i> VS <i>T. rosea</i> |
| NKXS01003876.1 | 40408 | <i>T. aurea</i> VS <i>T. rosea</i> |
| NKXS01003876.1 | 40413 | <i>T. aurea</i> VS <i>T. rosea</i> |
| NKXS01003876.1 | 40465 | <i>T. aurea</i> VS <i>T. rosea</i> |
| NKXS01003878.1 | 17085 | <i>T. aurea</i> VS <i>T. rosea</i> |
| NKXS01003878.1 | 17092 | <i>T. aurea</i> VS <i>T. rosea</i> |
| NKXS01003878.1 | 17102 | <i>T. aurea</i> VS <i>T. rosea</i> |
| NKXS01003929.1 | 51054 | <i>T. aurea</i> VS <i>T. rosea</i> |
| NKXS01003929.1 | 51062 | <i>T. aurea</i> VS <i>T. rosea</i> |
| NKXS01003929.1 | 51189 | <i>T. aurea</i> VS <i>T. rosea</i> |
| NKXS01003929.1 | 51262 | <i>T. aurea</i> VS <i>T. rosea</i> |
| NKXS01003929.1 | 51276 | <i>T. aurea</i> VS <i>T. rosea</i> |
| NKXS01003956.1 | 23922 | <i>T. aurea</i> VS <i>T. rosea</i> |
| NKXS01003978.1 | 39018 | <i>T. aurea</i> VS <i>T. rosea</i> |
| NKXS01003978.1 | 39033 | <i>T. aurea</i> VS <i>T. rosea</i> |
| NKXS01003978.1 | 39090 | <i>T. aurea</i> VS <i>T. rosea</i> |
| NKXS01003978.1 | 39105 | <i>T. aurea</i> VS <i>T. rosea</i> |
| NKXS01003981.1 | 26543 | <i>T. aurea</i> VS <i>T. rosea</i> |
| NKXS01003982.1 | 17527 | <i>T. aurea</i> VS <i>T. rosea</i> |
| NKXS01003982.1 | 17589 | <i>T. aurea</i> VS <i>T. rosea</i> |
| NKXS01003982.1 | 17623 | <i>T. aurea</i> VS <i>T. rosea</i> |
| NKXS01003982.1 | 17646 | <i>T. aurea</i> VS <i>T. rosea</i> |
| NKXS01003982.1 | 17735 | <i>T. aurea</i> VS <i>T. rosea</i> |
| NKXS01003982.1 | 17749 | <i>T. aurea</i> VS <i>T. rosea</i> |
| NKXS01003982.1 | 17754 | <i>T. aurea</i> VS <i>T. rosea</i> |
| NKXS01003984.1 | 39586 | <i>T. aurea</i> VS <i>T. rosea</i> |
| NKXS01003984.1 | 39596 | <i>T. aurea</i> VS <i>T. rosea</i> |
| NKXS01004071.1 | 35243 | <i>T. aurea</i> VS <i>T. rosea</i> |
| NKXS01004120.1 | 22139 | <i>T. aurea</i> VS <i>T. rosea</i> |
| NKXS01004120.1 | 22148 | <i>T. aurea</i> VS <i>T. rosea</i> |
| NKXS01004120.1 | 22358 | <i>T. aurea</i> VS <i>T. rosea</i> |
| NKXS01004174.1 | 36699 | <i>T. aurea</i> VS <i>T. rosea</i> |

|                |       |                                    |
|----------------|-------|------------------------------------|
| NKXS01004174.1 | 36702 | <i>T. aurea</i> VS <i>T. rosea</i> |
| NKXS01004217.1 | 12945 | <i>T. aurea</i> VS <i>T. rosea</i> |
| NKXS01004235.1 | 60265 | <i>T. aurea</i> VS <i>T. rosea</i> |
| NKXS01004235.1 | 60274 | <i>T. aurea</i> VS <i>T. rosea</i> |
| NKXS01004365.1 | 36580 | <i>T. aurea</i> VS <i>T. rosea</i> |
| NKXS01004365.1 | 36617 | <i>T. aurea</i> VS <i>T. rosea</i> |
| NKXS01004365.1 | 36663 | <i>T. aurea</i> VS <i>T. rosea</i> |
| NKXS01004365.1 | 36759 | <i>T. aurea</i> VS <i>T. rosea</i> |
| NKXS01004486.1 | 39924 | <i>T. aurea</i> VS <i>T. rosea</i> |
| NKXS01004486.1 | 39927 | <i>T. aurea</i> VS <i>T. rosea</i> |
| NKXS01004486.1 | 39975 | <i>T. aurea</i> VS <i>T. rosea</i> |
| NKXS01004543.1 | 43794 | <i>T. aurea</i> VS <i>T. rosea</i> |
| NKXS01004543.1 | 43811 | <i>T. aurea</i> VS <i>T. rosea</i> |
| NKXS01004543.1 | 43818 | <i>T. aurea</i> VS <i>T. rosea</i> |
| NKXS01004543.1 | 43840 | <i>T. aurea</i> VS <i>T. rosea</i> |
| NKXS01004673.1 | 21964 | <i>T. aurea</i> VS <i>T. rosea</i> |
| NKXS01004673.1 | 22039 | <i>T. aurea</i> VS <i>T. rosea</i> |
| NKXS01004673.1 | 22041 | <i>T. aurea</i> VS <i>T. rosea</i> |
| NKXS01004673.1 | 22155 | <i>T. aurea</i> VS <i>T. rosea</i> |
| NKXS01004914.1 | 53115 | <i>T. aurea</i> VS <i>T. rosea</i> |
| NKXS01004944.1 | 45170 | <i>T. aurea</i> VS <i>T. rosea</i> |
| NKXS01004944.1 | 45176 | <i>T. aurea</i> VS <i>T. rosea</i> |
| NKXS01004944.1 | 45194 | <i>T. aurea</i> VS <i>T. rosea</i> |
| NKXS01004944.1 | 45328 | <i>T. aurea</i> VS <i>T. rosea</i> |
| NKXS01004944.1 | 45342 | <i>T. aurea</i> VS <i>T. rosea</i> |
| NKXS01004944.1 | 45351 | <i>T. aurea</i> VS <i>T. rosea</i> |
| NKXS01005229.1 | 43579 | <i>T. aurea</i> VS <i>T. rosea</i> |
| NKXS01005229.1 | 43606 | <i>T. aurea</i> VS <i>T. rosea</i> |
| NKXS01005229.1 | 43661 | <i>T. aurea</i> VS <i>T. rosea</i> |
| NKXS01005229.1 | 43708 | <i>T. aurea</i> VS <i>T. rosea</i> |
| NKXS01005229.1 | 43756 | <i>T. aurea</i> VS <i>T. rosea</i> |
| NKXS01005245.1 | 9925  | <i>T. aurea</i> VS <i>T. rosea</i> |
| NKXS01005274.1 | 19137 | <i>T. aurea</i> VS <i>T. rosea</i> |
| NKXS01005274.1 | 19176 | <i>T. aurea</i> VS <i>T. rosea</i> |
| NKXS01005274.1 | 19183 | <i>T. aurea</i> VS <i>T. rosea</i> |
| NKXS01005291.1 | 18050 | <i>T. aurea</i> VS <i>T. rosea</i> |
| NKXS01005291.1 | 18101 | <i>T. aurea</i> VS <i>T. rosea</i> |
| NKXS01005291.1 | 18107 | <i>T. aurea</i> VS <i>T. rosea</i> |
| NKXS01005365.1 | 10742 | <i>T. aurea</i> VS <i>T. rosea</i> |
| NKXS01005365.1 | 10787 | <i>T. aurea</i> VS <i>T. rosea</i> |
| NKXS01005365.1 | 10828 | <i>T. aurea</i> VS <i>T. rosea</i> |
| NKXS01005365.1 | 10865 | <i>T. aurea</i> VS <i>T. rosea</i> |
| NKXS01005396.1 | 90886 | <i>T. aurea</i> VS <i>T. rosea</i> |
| NKXS01005396.1 | 90910 | <i>T. aurea</i> VS <i>T. rosea</i> |

|                |       |                                    |
|----------------|-------|------------------------------------|
| NKXS01005463.1 | 41216 | <i>T. aurea</i> VS <i>T. rosea</i> |
| NKXS01005481.1 | 9358  | <i>T. aurea</i> VS <i>T. rosea</i> |
| NKXS01005481.1 | 9388  | <i>T. aurea</i> VS <i>T. rosea</i> |
| NKXS01005481.1 | 9422  | <i>T. aurea</i> VS <i>T. rosea</i> |
| NKXS01005481.1 | 9486  | <i>T. aurea</i> VS <i>T. rosea</i> |
| NKXS01005481.1 | 9555  | <i>T. aurea</i> VS <i>T. rosea</i> |
| NKXS01005481.1 | 9576  | <i>T. aurea</i> VS <i>T. rosea</i> |
| NKXS01005481.1 | 9631  | <i>T. aurea</i> VS <i>T. rosea</i> |
| NKXS01005539.1 | 27553 | <i>T. aurea</i> VS <i>T. rosea</i> |
| NKXS01005539.1 | 27588 | <i>T. aurea</i> VS <i>T. rosea</i> |
| NKXS01005655.1 | 12617 | <i>T. aurea</i> VS <i>T. rosea</i> |
| NKXS01005660.1 | 10539 | <i>T. aurea</i> VS <i>T. rosea</i> |
| NKXS01005660.1 | 10563 | <i>T. aurea</i> VS <i>T. rosea</i> |
| NKXS01005660.1 | 10588 | <i>T. aurea</i> VS <i>T. rosea</i> |
| NKXS01005660.1 | 10590 | <i>T. aurea</i> VS <i>T. rosea</i> |
| NKXS01005660.1 | 10727 | <i>T. aurea</i> VS <i>T. rosea</i> |
| NKXS01005677.1 | 13284 | <i>T. aurea</i> VS <i>T. rosea</i> |
| NKXS01005702.1 | 12811 | <i>T. aurea</i> VS <i>T. rosea</i> |
| NKXS01005702.1 | 12840 | <i>T. aurea</i> VS <i>T. rosea</i> |
| NKXS01005702.1 | 12919 | <i>T. aurea</i> VS <i>T. rosea</i> |
| NKXS01005789.1 | 10609 | <i>T. aurea</i> VS <i>T. rosea</i> |
| NKXS01005789.1 | 10611 | <i>T. aurea</i> VS <i>T. rosea</i> |
| NKXS01005789.1 | 10626 | <i>T. aurea</i> VS <i>T. rosea</i> |
| NKXS01005789.1 | 10679 | <i>T. aurea</i> VS <i>T. rosea</i> |
| NKXS01005789.1 | 10806 | <i>T. aurea</i> VS <i>T. rosea</i> |
| NKXS01005969.1 | 11133 | <i>T. aurea</i> VS <i>T. rosea</i> |
| NKXS01005969.1 | 11162 | <i>T. aurea</i> VS <i>T. rosea</i> |
| NKXS01005969.1 | 11167 | <i>T. aurea</i> VS <i>T. rosea</i> |
| NKXS01005969.1 | 11177 | <i>T. aurea</i> VS <i>T. rosea</i> |
| NKXS01005969.1 | 11188 | <i>T. aurea</i> VS <i>T. rosea</i> |
| NKXS01005969.1 | 11194 | <i>T. aurea</i> VS <i>T. rosea</i> |
| NKXS01005969.1 | 11227 | <i>T. aurea</i> VS <i>T. rosea</i> |
| NKXS01005969.1 | 11283 | <i>T. aurea</i> VS <i>T. rosea</i> |
| NKXS01005969.1 | 11287 | <i>T. aurea</i> VS <i>T. rosea</i> |
| NKXS01005969.1 | 11291 | <i>T. aurea</i> VS <i>T. rosea</i> |
| NKXS01005969.1 | 11294 | <i>T. aurea</i> VS <i>T. rosea</i> |
| NKXS01005969.1 | 11296 | <i>T. aurea</i> VS <i>T. rosea</i> |
| NKXS01005969.1 | 11364 | <i>T. aurea</i> VS <i>T. rosea</i> |
| NKXS01005969.1 | 11383 | <i>T. aurea</i> VS <i>T. rosea</i> |
| NKXS01005998.1 | 41288 | <i>T. aurea</i> VS <i>T. rosea</i> |
| NKXS01006000.1 | 40605 | <i>T. aurea</i> VS <i>T. rosea</i> |
| NKXS01006000.1 | 40729 | <i>T. aurea</i> VS <i>T. rosea</i> |
| NKXS01006000.1 | 40754 | <i>T. aurea</i> VS <i>T. rosea</i> |
| NKXS01006000.1 | 40790 | <i>T. aurea</i> VS <i>T. rosea</i> |

|                |       |                                    |
|----------------|-------|------------------------------------|
| NKXS01006000.1 | 40835 | <i>T. aurea</i> VS <i>T. rosea</i> |
| NKXS01006000.1 | 40838 | <i>T. aurea</i> VS <i>T. rosea</i> |
| NKXS01006000.1 | 40840 | <i>T. aurea</i> VS <i>T. rosea</i> |
| NKXS01006038.1 | 24339 | <i>T. aurea</i> VS <i>T. rosea</i> |
| NKXS01006038.1 | 24470 | <i>T. aurea</i> VS <i>T. rosea</i> |
| NKXS01006113.1 | 2640  | <i>T. aurea</i> VS <i>T. rosea</i> |
| NKXS01006113.1 | 2676  | <i>T. aurea</i> VS <i>T. rosea</i> |
| NKXS01006113.1 | 2720  | <i>T. aurea</i> VS <i>T. rosea</i> |
| NKXS01006113.1 | 2752  | <i>T. aurea</i> VS <i>T. rosea</i> |
| NKXS01006151.1 | 20468 | <i>T. aurea</i> VS <i>T. rosea</i> |
| NKXS01006151.1 | 20620 | <i>T. aurea</i> VS <i>T. rosea</i> |
| NKXS01006201.1 | 38463 | <i>T. aurea</i> VS <i>T. rosea</i> |
| NKXS01006201.1 | 38486 | <i>T. aurea</i> VS <i>T. rosea</i> |
| NKXS01006201.1 | 38634 | <i>T. aurea</i> VS <i>T. rosea</i> |
| NKXS01006286.1 | 28005 | <i>T. aurea</i> VS <i>T. rosea</i> |
| NKXS01006286.1 | 28008 | <i>T. aurea</i> VS <i>T. rosea</i> |
| NKXS01006286.1 | 28038 | <i>T. aurea</i> VS <i>T. rosea</i> |
| NKXS01006286.1 | 28161 | <i>T. aurea</i> VS <i>T. rosea</i> |
| NKXS01006286.1 | 28219 | <i>T. aurea</i> VS <i>T. rosea</i> |
| NKXS01006286.1 | 28238 | <i>T. aurea</i> VS <i>T. rosea</i> |
| NKXS01006286.1 | 28252 | <i>T. aurea</i> VS <i>T. rosea</i> |
| NKXS01006289.1 | 3045  | <i>T. aurea</i> VS <i>T. rosea</i> |
| NKXS01006289.1 | 3064  | <i>T. aurea</i> VS <i>T. rosea</i> |
| NKXS01006289.1 | 3108  | <i>T. aurea</i> VS <i>T. rosea</i> |
| NKXS01006289.1 | 3113  | <i>T. aurea</i> VS <i>T. rosea</i> |
| NKXS01006461.1 | 30571 | <i>T. aurea</i> VS <i>T. rosea</i> |
| NKXS01006461.1 | 30598 | <i>T. aurea</i> VS <i>T. rosea</i> |
| NKXS01006461.1 | 30688 | <i>T. aurea</i> VS <i>T. rosea</i> |
| NKXS01006461.1 | 30738 | <i>T. aurea</i> VS <i>T. rosea</i> |
| NKXS01006490.1 | 30303 | <i>T. aurea</i> VS <i>T. rosea</i> |
| NKXS01006490.1 | 30397 | <i>T. aurea</i> VS <i>T. rosea</i> |
| NKXS01006502.1 | 20575 | <i>T. aurea</i> VS <i>T. rosea</i> |
| NKXS01006502.1 | 20625 | <i>T. aurea</i> VS <i>T. rosea</i> |
| NKXS01006502.1 | 20634 | <i>T. aurea</i> VS <i>T. rosea</i> |
| NKXS01006626.1 | 21575 | <i>T. aurea</i> VS <i>T. rosea</i> |
| NKXS01006626.1 | 21626 | <i>T. aurea</i> VS <i>T. rosea</i> |
| NKXS01006626.1 | 21627 | <i>T. aurea</i> VS <i>T. rosea</i> |
| NKXS01006626.1 | 21704 | <i>T. aurea</i> VS <i>T. rosea</i> |
| NKXS01006626.1 | 21709 | <i>T. aurea</i> VS <i>T. rosea</i> |
| NKXS01006626.1 | 21790 | <i>T. aurea</i> VS <i>T. rosea</i> |
| NKXS01006626.1 | 21795 | <i>T. aurea</i> VS <i>T. rosea</i> |
| NKXS01006752.1 | 5587  | <i>T. aurea</i> VS <i>T. rosea</i> |
| NKXS01006752.1 | 5592  | <i>T. aurea</i> VS <i>T. rosea</i> |
| NKXS01006752.1 | 5609  | <i>T. aurea</i> VS <i>T. rosea</i> |



|                |       |                                    |
|----------------|-------|------------------------------------|
| NKXS01006752.1 | 5633  | <i>T. aurea</i> VS <i>T. rosea</i> |
| NKXS01006752.1 | 5641  | <i>T. aurea</i> VS <i>T. rosea</i> |
| NKXS01006752.1 | 5713  | <i>T. aurea</i> VS <i>T. rosea</i> |
| NKXS01007170.1 | 20636 | <i>T. aurea</i> VS <i>T. rosea</i> |
| NKXS01007170.1 | 20716 | <i>T. aurea</i> VS <i>T. rosea</i> |
| NKXS01007170.1 | 20745 | <i>T. aurea</i> VS <i>T. rosea</i> |
| NKXS01007170.1 | 20840 | <i>T. aurea</i> VS <i>T. rosea</i> |
| NKXS01007170.1 | 20846 | <i>T. aurea</i> VS <i>T. rosea</i> |
| NKXS01007229.1 | 19372 | <i>T. aurea</i> VS <i>T. rosea</i> |
| NKXS01007229.1 | 19576 | <i>T. aurea</i> VS <i>T. rosea</i> |
| NKXS01007229.1 | 19616 | <i>T. aurea</i> VS <i>T. rosea</i> |
| NKXS01007455.1 | 15213 | <i>T. aurea</i> VS <i>T. rosea</i> |
| NKXS01007455.1 | 15283 | <i>T. aurea</i> VS <i>T. rosea</i> |
| NKXS01007455.1 | 15298 | <i>T. aurea</i> VS <i>T. rosea</i> |
| NKXS01007455.1 | 15328 | <i>T. aurea</i> VS <i>T. rosea</i> |
| NKXS01007580.1 | 2113  | <i>T. aurea</i> VS <i>T. rosea</i> |
| NKXS01007580.1 | 2163  | <i>T. aurea</i> VS <i>T. rosea</i> |
| NKXS01007580.1 | 2290  | <i>T. aurea</i> VS <i>T. rosea</i> |
| NKXS01007580.1 | 2305  | <i>T. aurea</i> VS <i>T. rosea</i> |
| NKXS01007633.1 | 17025 | <i>T. aurea</i> VS <i>T. rosea</i> |
| NKXS01007633.1 | 17046 | <i>T. aurea</i> VS <i>T. rosea</i> |
| NKXS01007642.1 | 4958  | <i>T. aurea</i> VS <i>T. rosea</i> |
| NKXS01007673.1 | 15860 | <i>T. aurea</i> VS <i>T. rosea</i> |
| NKXS01007673.1 | 15995 | <i>T. aurea</i> VS <i>T. rosea</i> |
| NKXS01007673.1 | 16037 | <i>T. aurea</i> VS <i>T. rosea</i> |
| NKXS01007673.1 | 16052 | <i>T. aurea</i> VS <i>T. rosea</i> |
| NKXS01007685.1 | 10090 | <i>T. aurea</i> VS <i>T. rosea</i> |
| NKXS01007685.1 | 10135 | <i>T. aurea</i> VS <i>T. rosea</i> |
| NKXS01007685.1 | 10220 | <i>T. aurea</i> VS <i>T. rosea</i> |
| NKXS01007685.1 | 10226 | <i>T. aurea</i> VS <i>T. rosea</i> |
| NKXS01008034.1 | 13628 | <i>T. aurea</i> VS <i>T. rosea</i> |
| NKXS01008034.1 | 13665 | <i>T. aurea</i> VS <i>T. rosea</i> |
| NKXS01008034.1 | 13797 | <i>T. aurea</i> VS <i>T. rosea</i> |
| NKXS01008082.1 | 22276 | <i>T. aurea</i> VS <i>T. rosea</i> |
| NKXS01008082.1 | 22330 | <i>T. aurea</i> VS <i>T. rosea</i> |
| NKXS01008082.1 | 22341 | <i>T. aurea</i> VS <i>T. rosea</i> |
| NKXS01008082.1 | 22388 | <i>T. aurea</i> VS <i>T. rosea</i> |
| NKXS01008082.1 | 22437 | <i>T. aurea</i> VS <i>T. rosea</i> |
| NKXS01008110.1 | 15782 | <i>T. aurea</i> VS <i>T. rosea</i> |
| NKXS01008171.1 | 9375  | <i>T. aurea</i> VS <i>T. rosea</i> |
| NKXS01008234.1 | 3807  | <i>T. aurea</i> VS <i>T. rosea</i> |
| NKXS01008255.1 | 6105  | <i>T. aurea</i> VS <i>T. rosea</i> |
| NKXS01008732.1 | 9682  | <i>T. aurea</i> VS <i>T. rosea</i> |
| NKXS01008732.1 | 9697  | <i>T. aurea</i> VS <i>T. rosea</i> |

|                |       |                                    |
|----------------|-------|------------------------------------|
| NKXS01008732.1 | 9716  | <i>T. aurea</i> VS <i>T. rosea</i> |
| NKXS01008732.1 | 9752  | <i>T. aurea</i> VS <i>T. rosea</i> |
| NKXS01008860.1 | 11169 | <i>T. aurea</i> VS <i>T. rosea</i> |
| NKXS01008860.1 | 11272 | <i>T. aurea</i> VS <i>T. rosea</i> |
| NKXS01008860.1 | 11309 | <i>T. aurea</i> VS <i>T. rosea</i> |
| NKXS01008945.1 | 1930  | <i>T. aurea</i> VS <i>T. rosea</i> |
| NKXS01008945.1 | 1978  | <i>T. aurea</i> VS <i>T. rosea</i> |
| NKXS01009944.1 | 3047  | <i>T. aurea</i> VS <i>T. rosea</i> |
| NKXS01009944.1 | 3062  | <i>T. aurea</i> VS <i>T. rosea</i> |
| NKXS01010144.1 | 1932  | <i>T. aurea</i> VS <i>T. rosea</i> |
| NKXS01010144.1 | 1945  | <i>T. aurea</i> VS <i>T. rosea</i> |
| NKXS01010144.1 | 1984  | <i>T. aurea</i> VS <i>T. rosea</i> |

---
