# Supplementary material for: Identification of Commercial Cultivars in the Tabebuia Alliance Using Genotyping-by-Sequencing
Source: MDPI journal article supplement (doi:10.3390/f14020271), 2023-01-31
Supplement: s1 [file s1]

**Table S10.** 54 SNPs used for constructing fingerprints

| Scaffolds      | Position | Resolution                                        |
|----------------|----------|---------------------------------------------------|
| NKXS01000371.1 | 62962    | Group1 VS Group2                                  |
| NKXS01000454.1 | 122172   | Group1 VS Group2                                  |
| NKXS01000733.1 | 6796     | Group1 VS Group3                                  |
| NKXS01000791.1 | 14587    | Group1 VS Group3                                  |
| NKXS01000230.1 | 85909    | Group2 VS Group3                                  |
| NKXS01000662.1 | 95796    | Group2 VS Group3                                  |
| NKXS01003823.1 | 44826    | <i>H. impetiginosus</i> VS <i>H. heptaphyllus</i> |
| NKXS01002126.1 | 81249    | <i>H. impetiginosus</i> VS <i>H. heptaphyllus</i> |
| NKXS01007454.1 | 10745    | <i>H. impetiginosus</i> VS <i>H. heptaphyllus</i> |
| NKXS01001193.1 | 1231     | <i>T. aurea</i> VS <i>T. rosea</i>                |
| NKXS01002282.1 | 36136    | <i>T. aurea</i> VS <i>T. rosea</i>                |
| NKXS01006502.1 | 20625    | <i>T. aurea</i> VS <i>T. rosea</i>                |
| NKXS01000709.1 | 29595    | <i>H. chrysanthus</i> VS <i>H. chrysotrichus</i>  |
| NKXS01002815.1 | 44459    | <i>H. chrysanthus</i> VS <i>H. chrysotrichus</i>  |
| NKXS01004763.1 | 23293    | <i>H. chrysanthus</i> VS <i>H. chrysotrichus</i>  |
| NKXS01000610.1 | 45214    | Cultivar in <i>H. impetiginosus</i>               |
| NKXS01003775.1 | 20451    | Cultivar in <i>H. impetiginosus</i>               |
| NKXS01003956.1 | 23937    | Cultivar in <i>H. impetiginosus</i>               |
| NKXS01005510.1 | 73117    | Cultivar in <i>H. impetiginosus</i>               |
| NKXS01006739.1 | 20576    | Cultivar in <i>H. impetiginosus</i>               |
| NKXS01008073.1 | 8769     | Cultivar in <i>H. impetiginosus</i>               |
| NKXS01000186.1 | 222598   | Hybrid Cultivar                                   |
| NKXS01000493.1 | 10008    | Hybrid Cultivar                                   |
| NKXS01002196.1 | 20216    | Hybrid Cultivar                                   |
| NKXS01007455.1 | 15385    | Hybrid Cultivar                                   |
| NKXS01002966.1 | 37960    | Cultivar in <i>H. heptaphyllus</i>                |
| NKXS01003712.1 | 33657    | Cultivar in <i>H. heptaphyllus</i>                |
| NKXS01002675.1 | 66996    | Cultivar in <i>T. aurea</i>                       |
| NKXS01004944.1 | 45094    | Cultivar in <i>T. aurea</i>                       |
| NKXS01001495.1 | 108648   | Cultivar in <i>T. rosea</i>                       |
| NKXS01001851.1 | 1650     | Cultivar in <i>T. rosea</i>                       |
| NKXS01002382.1 | 64966    | Cultivar in <i>T. rosea</i>                       |
| NKXS01002382.1 | 65038    | Cultivar in <i>T. rosea</i>                       |
| NKXS01010939.1 | 2419     | Cultivar in <i>T. rosea</i>                       |
| NKXS01000132.1 | 140446   | Cultivar in <i>H. chrysotrichus</i>               |
| NKXS01000468.1 | 10587    | Cultivar in <i>H. chrysotrichus</i>               |
| NKXS01001288.1 | 26001    | Cultivar in <i>H. chrysotrichus</i>               |
| NKXS01002203.1 | 65090    | Cultivar in <i>H. chrysotrichus</i>               |
| NKXS01002266.1 | 94860    | Cultivar in <i>H. chrysotrichus</i>               |
| NKXS01004639.1 | 12265    | Cultivar in <i>H. chrysotrichus</i>               |
| NKXS01008197.1 | 13623    | Cultivar in <i>H. chrysotrichus</i>               |

|                |        |                                   |
|----------------|--------|-----------------------------------|
| NKXS01000067.1 | 4886   | Cultivar in <i>H. chrysanthus</i> |
| NKXS01000068.1 | 166324 | Cultivar in <i>H. chrysanthus</i> |
| NKXS01000397.1 | 300    | Cultivar in <i>H. chrysanthus</i> |
| NKXS01000559.1 | 13471  | Cultivar in <i>H. chrysanthus</i> |
| NKXS01000631.1 | 163667 | Cultivar in <i>H. chrysanthus</i> |
| NKXS01001954.1 | 47087  | Cultivar in <i>H. chrysanthus</i> |
| NKXS01002063.1 | 53905  | Cultivar in <i>H. chrysanthus</i> |
| NKXS01003275.1 | 37835  | Cultivar in <i>H. chrysanthus</i> |
| NKXS01003972.1 | 15450  | Cultivar in <i>H. chrysanthus</i> |
| NKXS01004801.1 | 28766  | Cultivar in <i>H. chrysanthus</i> |
| NKXS01005446.1 | 18584  | Cultivar in <i>H. chrysanthus</i> |
| NKXS01005499.1 | 6472   | Cultivar in <i>H. chrysanthus</i> |
| NKXS01006603.1 | 35428  | Cultivar in <i>H. chrysanthus</i> |

---
