# Supplementary material for: Identification of Commercial Cultivars in the Tabebuia Alliance Using Genotyping-by-Sequencing
Source: MDPI journal article supplement (doi:10.3390/f14020271), 2023-01-31
Supplement: s1 [file s1]

**Table S9.** High-quality loci could be used for distinguish cultivar in hybrids/unknow species

| Species | Scaffolds      | Position | Rate of no-majority genotype |
|---------|----------------|----------|------------------------------|
| Hybrids | NKXS01000279.1 | 88250    | 0.64                         |
| Hybrids | NKXS01000422.1 | 45454    | 0.64                         |
| Hybrids | NKXS01000493.1 | 10008    | 0.64                         |
| Hybrids | NKXS01000493.1 | 10016    | 0.64                         |
| Hybrids | NKXS01000493.1 | 10162    | 0.64                         |
| Hybrids | NKXS01000493.1 | 10182    | 0.64                         |
| Hybrids | NKXS01000931.1 | 113530   | 0.64                         |
| Hybrids | NKXS01001169.1 | 147019   | 0.64                         |
| Hybrids | NKXS01001170.1 | 1100     | 0.64                         |
| Hybrids | NKXS01001831.1 | 44905    | 0.64                         |
| Hybrids | NKXS01001831.1 | 45007    | 0.64                         |
| Hybrids | NKXS01001831.1 | 45042    | 0.64                         |
| Hybrids | NKXS01002344.1 | 83696    | 0.64                         |
| Hybrids | NKXS01002411.1 | 90589    | 0.64                         |
| Hybrids | NKXS01003242.1 | 22549    | 0.64                         |
| Hybrids | NKXS01003929.1 | 51247    | 0.64                         |
| Hybrids | NKXS01004120.1 | 22145    | 0.64                         |
| Hybrids | NKXS01004120.1 | 22313    | 0.64                         |
| Hybrids | NKXS01004369.1 | 11419    | 0.64                         |
| Hybrids | NKXS01004369.1 | 11422    | 0.64                         |
| Hybrids | NKXS01004369.1 | 11471    | 0.64                         |
| Hybrids | NKXS01004369.1 | 11507    | 0.64                         |
| Hybrids | NKXS01004369.1 | 11518    | 0.64                         |
| Hybrids | NKXS01004536.1 | 39287    | 0.64                         |
| Hybrids | NKXS01004536.1 | 39347    | 0.64                         |
| Hybrids | NKXS01004536.1 | 39489    | 0.64                         |
| Hybrids | NKXS01004579.1 | 41370    | 0.64                         |
| Hybrids | NKXS01006619.1 | 34755    | 0.64                         |
| Hybrids | NKXS01006731.1 | 43972    | 0.64                         |
| Hybrids | NKXS01006739.1 | 20514    | 0.64                         |
| Hybrids | NKXS01006739.1 | 20547    | 0.64                         |
| Hybrids | NKXS01006739.1 | 20650    | 0.64                         |
| Hybrids | NKXS01007121.1 | 8799     | 0.64                         |
| Hybrids | NKXS01007461.1 | 21615    | 0.64                         |
| Hybrids | NKXS01007633.1 | 16950    | 0.64                         |
| Hybrids | NKXS01000097.1 | 29639    | 0.55                         |
| Hybrids | NKXS01000144.1 | 9609     | 0.55                         |
| Hybrids | NKXS01000151.1 | 49416    | 0.55                         |
| Hybrids | NKXS01000159.1 | 109120   | 0.55                         |
| Hybrids | NKXS01000159.1 | 109307   | 0.55                         |
| Hybrids | NKXS01000175.1 | 58064    | 0.55                         |

|         |                |        |      |
|---------|----------------|--------|------|
| Hybrids | NKXS01000175.1 | 58166  | 0.55 |
| Hybrids | NKXS01000175.1 | 79619  | 0.55 |
| Hybrids | NKXS01000178.1 | 104143 | 0.55 |
| Hybrids | NKXS01000186.1 | 222598 | 0.55 |
| Hybrids | NKXS01000186.1 | 222726 | 0.55 |
| Hybrids | NKXS01000236.1 | 9111   | 0.55 |
| Hybrids | NKXS01000257.1 | 51618  | 0.55 |
| Hybrids | NKXS01000263.1 | 7545   | 0.55 |
| Hybrids | NKXS01000308.1 | 1202   | 0.55 |
| Hybrids | NKXS01000321.1 | 84528  | 0.55 |
| Hybrids | NKXS01000353.1 | 4089   | 0.55 |
| Hybrids | NKXS01000353.1 | 4127   | 0.55 |
| Hybrids | NKXS01000353.1 | 4174   | 0.55 |
| Hybrids | NKXS01000396.1 | 67110  | 0.55 |
| Hybrids | NKXS01000437.1 | 6108   | 0.55 |
| Hybrids | NKXS01000444.1 | 71705  | 0.55 |
| Hybrids | NKXS01000465.1 | 67444  | 0.55 |
| Hybrids | NKXS01000484.1 | 137203 | 0.55 |
| Hybrids | NKXS01000484.1 | 137289 | 0.55 |
| Hybrids | NKXS01000484.1 | 137317 | 0.55 |
| Hybrids | NKXS01000484.1 | 137321 | 0.55 |
| Hybrids | NKXS01000484.1 | 137431 | 0.55 |
| Hybrids | NKXS01000484.1 | 137435 | 0.55 |
| Hybrids | NKXS01000484.1 | 137440 | 0.55 |
| Hybrids | NKXS01000484.1 | 137461 | 0.55 |
| Hybrids | NKXS01000487.1 | 107013 | 0.55 |
| Hybrids | NKXS01000487.1 | 107155 | 0.55 |
| Hybrids | NKXS01000562.1 | 56558  | 0.55 |
| Hybrids | NKXS01000562.1 | 56590  | 0.55 |
| Hybrids | NKXS01000562.1 | 56602  | 0.55 |
| Hybrids | NKXS01000582.1 | 3917   | 0.55 |
| Hybrids | NKXS01000582.1 | 3980   | 0.55 |
| Hybrids | NKXS01000600.1 | 280503 | 0.55 |
| Hybrids | NKXS01000610.1 | 45217  | 0.55 |
| Hybrids | NKXS01000610.1 | 45250  | 0.55 |
| Hybrids | NKXS01000733.1 | 91004  | 0.55 |
| Hybrids | NKXS01000733.1 | 91024  | 0.55 |
| Hybrids | NKXS01000733.1 | 91025  | 0.55 |
| Hybrids | NKXS01000777.1 | 8176   | 0.55 |
| Hybrids | NKXS01000777.1 | 8178   | 0.55 |
| Hybrids | NKXS01000777.1 | 8201   | 0.55 |
| Hybrids | NKXS01000777.1 | 8294   | 0.55 |
| Hybrids | NKXS01000824.1 | 22974  | 0.55 |
| Hybrids | NKXS01000892.1 | 25430  | 0.55 |

|         |                |        |      |
|---------|----------------|--------|------|
| Hybrids | NKXS01000965.1 | 113911 | 0.55 |
| Hybrids | NKXS01000965.1 | 114068 | 0.55 |
| Hybrids | NKXS01000983.1 | 22011  | 0.55 |
| Hybrids | NKXS01001144.1 | 2644   | 0.55 |
| Hybrids | NKXS01001144.1 | 2739   | 0.55 |
| Hybrids | NKXS01001144.1 | 2752   | 0.55 |
| Hybrids | NKXS01001170.1 | 1043   | 0.55 |
| Hybrids | NKXS01001170.1 | 1082   | 0.55 |
| Hybrids | NKXS01001211.1 | 24901  | 0.55 |
| Hybrids | NKXS01001328.1 | 60399  | 0.55 |
| Hybrids | NKXS01001328.1 | 60519  | 0.55 |
| Hybrids | NKXS01001329.1 | 96274  | 0.55 |
| Hybrids | NKXS01001400.1 | 10085  | 0.55 |
| Hybrids | NKXS01001448.1 | 83899  | 0.55 |
| Hybrids | NKXS01001448.1 | 83965  | 0.55 |
| Hybrids | NKXS01001448.1 | 84004  | 0.55 |
| Hybrids | NKXS01001449.1 | 65980  | 0.55 |
| Hybrids | NKXS01001471.1 | 19496  | 0.55 |
| Hybrids | NKXS01001471.1 | 19547  | 0.55 |
| Hybrids | NKXS01001471.1 | 19628  | 0.55 |
| Hybrids | NKXS01001471.1 | 19640  | 0.55 |
| Hybrids | NKXS01001471.1 | 19665  | 0.55 |
| Hybrids | NKXS01001471.1 | 19680  | 0.55 |
| Hybrids | NKXS01001525.1 | 57136  | 0.55 |
| Hybrids | NKXS01001525.1 | 57181  | 0.55 |
| Hybrids | NKXS01001642.1 | 76062  | 0.55 |
| Hybrids | NKXS01001658.1 | 67645  | 0.55 |
| Hybrids | NKXS01001663.1 | 29286  | 0.55 |
| Hybrids | NKXS01001663.1 | 29355  | 0.55 |
| Hybrids | NKXS01001663.1 | 30015  | 0.55 |
| Hybrids | NKXS01001755.1 | 55408  | 0.55 |
| Hybrids | NKXS01001755.1 | 55458  | 0.55 |
| Hybrids | NKXS01001755.1 | 55483  | 0.55 |
| Hybrids | NKXS01001777.1 | 28641  | 0.55 |
| Hybrids | NKXS01001817.1 | 26284  | 0.55 |
| Hybrids | NKXS01001875.1 | 34589  | 0.55 |
| Hybrids | NKXS01001972.1 | 6902   | 0.55 |
| Hybrids | NKXS01001972.1 | 6940   | 0.55 |
| Hybrids | NKXS01001972.1 | 6977   | 0.55 |
| Hybrids | NKXS01001987.1 | 141179 | 0.55 |
| Hybrids | NKXS01002108.1 | 3870   | 0.55 |
| Hybrids | NKXS01002148.1 | 12333  | 0.55 |
| Hybrids | NKXS01002196.1 | 20240  | 0.55 |
| Hybrids | NKXS01002282.1 | 35967  | 0.55 |

|         |                |       |      |
|---------|----------------|-------|------|
| Hybrids | NKXS01002288.1 | 1914  | 0.55 |
| Hybrids | NKXS01002502.1 | 19912 | 0.55 |
| Hybrids | NKXS01002502.1 | 19953 | 0.55 |
| Hybrids | NKXS01002519.1 | 13549 | 0.55 |
| Hybrids | NKXS01002555.1 | 35150 | 0.55 |
| Hybrids | NKXS01002575.1 | 6267  | 0.55 |
| Hybrids | NKXS01002616.1 | 41843 | 0.55 |
| Hybrids | NKXS01002616.1 | 41924 | 0.55 |
| Hybrids | NKXS01002616.1 | 42020 | 0.55 |
| Hybrids | NKXS01002646.1 | 40757 | 0.55 |
| Hybrids | NKXS01002744.1 | 48835 | 0.55 |
| Hybrids | NKXS01002744.1 | 48893 | 0.55 |
| Hybrids | NKXS01002745.1 | 33498 | 0.55 |
| Hybrids | NKXS01002749.1 | 28651 | 0.55 |
| Hybrids | NKXS01002828.1 | 93130 | 0.55 |
| Hybrids | NKXS01002828.1 | 93140 | 0.55 |
| Hybrids | NKXS01002828.1 | 93144 | 0.55 |
| Hybrids | NKXS01002828.1 | 93149 | 0.55 |
| Hybrids | NKXS01002828.1 | 93162 | 0.55 |
| Hybrids | NKXS01003043.1 | 74905 | 0.55 |
| Hybrids | NKXS01003078.1 | 16425 | 0.55 |
| Hybrids | NKXS01003091.1 | 9385  | 0.55 |
| Hybrids | NKXS01003091.1 | 9569  | 0.55 |
| Hybrids | NKXS01003113.1 | 33067 | 0.55 |
| Hybrids | NKXS01003142.1 | 55098 | 0.55 |
| Hybrids | NKXS01003142.1 | 55155 | 0.55 |
| Hybrids | NKXS01003142.1 | 55186 | 0.55 |
| Hybrids | NKXS01003278.1 | 59660 | 0.55 |
| Hybrids | NKXS01003278.1 | 59666 | 0.55 |
| Hybrids | NKXS01003340.1 | 37397 | 0.55 |
| Hybrids | NKXS01003382.1 | 15014 | 0.55 |
| Hybrids | NKXS01003382.1 | 15021 | 0.55 |
| Hybrids | NKXS01003545.1 | 33613 | 0.55 |
| Hybrids | NKXS01003549.1 | 31451 | 0.55 |
| Hybrids | NKXS01003549.1 | 31469 | 0.55 |
| Hybrids | NKXS01003576.1 | 98109 | 0.55 |
| Hybrids | NKXS01003668.1 | 11465 | 0.55 |
| Hybrids | NKXS01003717.1 | 21640 | 0.55 |
| Hybrids | NKXS01003929.1 | 51094 | 0.55 |
| Hybrids | NKXS01003929.1 | 51184 | 0.55 |
| Hybrids | NKXS01003955.1 | 38763 | 0.55 |
| Hybrids | NKXS01003956.1 | 23937 | 0.55 |
| Hybrids | NKXS01003972.1 | 15396 | 0.55 |
| Hybrids | NKXS01003972.1 | 15560 | 0.55 |

|         |                |       |      |
|---------|----------------|-------|------|
| Hybrids | NKXS01003972.1 | 15566 | 0.55 |
| Hybrids | NKXS01003978.1 | 39096 | 0.55 |
| Hybrids | NKXS01004041.1 | 32103 | 0.55 |
| Hybrids | NKXS01004041.1 | 32108 | 0.55 |
| Hybrids | NKXS01004069.1 | 81620 | 0.55 |
| Hybrids | NKXS01004071.1 | 16529 | 0.55 |
| Hybrids | NKXS01004122.1 | 59309 | 0.55 |
| Hybrids | NKXS01004122.1 | 59370 | 0.55 |
| Hybrids | NKXS01004122.1 | 59377 | 0.55 |
| Hybrids | NKXS01004137.1 | 29057 | 0.55 |
| Hybrids | NKXS01004175.1 | 36477 | 0.55 |
| Hybrids | NKXS01004263.1 | 50673 | 0.55 |
| Hybrids | NKXS01004263.1 | 50844 | 0.55 |
| Hybrids | NKXS01004369.1 | 11487 | 0.55 |
| Hybrids | NKXS01004437.1 | 14820 | 0.55 |
| Hybrids | NKXS01004543.1 | 43799 | 0.55 |
| Hybrids | NKXS01004543.1 | 43910 | 0.55 |
| Hybrids | NKXS01004579.1 | 41408 | 0.55 |
| Hybrids | NKXS01004756.1 | 15578 | 0.55 |
| Hybrids | NKXS01004756.1 | 15600 | 0.55 |
| Hybrids | NKXS01004966.1 | 55876 | 0.55 |
| Hybrids | NKXS01005129.1 | 25048 | 0.55 |
| Hybrids | NKXS01005129.1 | 25058 | 0.55 |
| Hybrids | NKXS01005129.1 | 25101 | 0.55 |
| Hybrids | NKXS01005156.1 | 24156 | 0.55 |
| Hybrids | NKXS01005210.1 | 15532 | 0.55 |
| Hybrids | NKXS01005210.1 | 1637  | 0.55 |
| Hybrids | NKXS01005210.1 | 1740  | 0.55 |
| Hybrids | NKXS01005651.1 | 19671 | 0.55 |
| Hybrids | NKXS01005702.1 | 12902 | 0.55 |
| Hybrids | NKXS01005789.1 | 10813 | 0.55 |
| Hybrids | NKXS01005789.1 | 23722 | 0.55 |
| Hybrids | NKXS01005865.1 | 29154 | 0.55 |
| Hybrids | NKXS01006000.1 | 40616 | 0.55 |
| Hybrids | NKXS01006000.1 | 40739 | 0.55 |
| Hybrids | NKXS01006000.1 | 40836 | 0.55 |
| Hybrids | NKXS01006066.1 | 23751 | 0.55 |
| Hybrids | NKXS01006151.1 | 20677 | 0.55 |
| Hybrids | NKXS01006201.1 | 20114 | 0.55 |
| Hybrids | NKXS01006289.1 | 3133  | 0.55 |
| Hybrids | NKXS01006289.1 | 3268  | 0.55 |
| Hybrids | NKXS01006438.1 | 29511 | 0.55 |
| Hybrids | NKXS01006438.1 | 29607 | 0.55 |
| Hybrids | NKXS01006479.1 | 34378 | 0.55 |

|         |                |        |      |
|---------|----------------|--------|------|
| Hybrids | NKXS01006639.1 | 42046  | 0.55 |
| Hybrids | NKXS01006639.1 | 42067  | 0.55 |
| Hybrids | NKXS01006639.1 | 42130  | 0.55 |
| Hybrids | NKXS01006752.1 | 5511   | 0.55 |
| Hybrids | NKXS01006752.1 | 5631   | 0.55 |
| Hybrids | NKXS01006752.1 | 5767   | 0.55 |
| Hybrids | NKXS01006883.1 | 16541  | 0.55 |
| Hybrids | NKXS01006978.1 | 21641  | 0.55 |
| Hybrids | NKXS01006994.1 | 10029  | 0.55 |
| Hybrids | NKXS01007175.1 | 24825  | 0.55 |
| Hybrids | NKXS01007214.1 | 17093  | 0.55 |
| Hybrids | NKXS01007218.1 | 10190  | 0.55 |
| Hybrids | NKXS01007218.1 | 10365  | 0.55 |
| Hybrids | NKXS01007229.1 | 19390  | 0.55 |
| Hybrids | NKXS01007229.1 | 19444  | 0.55 |
| Hybrids | NKXS01007229.1 | 19576  | 0.55 |
| Hybrids | NKXS01007229.1 | 19585  | 0.55 |
| Hybrids | NKXS01007229.1 | 19597  | 0.55 |
| Hybrids | NKXS01007290.1 | 8084   | 0.55 |
| Hybrids | NKXS01007455.1 | 15385  | 0.55 |
| Hybrids | NKXS01007461.1 | 21591  | 0.55 |
| Hybrids | NKXS01007461.1 | 21628  | 0.55 |
| Hybrids | NKXS01007531.1 | 5455   | 0.55 |
| Hybrids | NKXS01007947.1 | 2694   | 0.55 |
| Hybrids | NKXS01007947.1 | 2714   | 0.55 |
| Hybrids | NKXS01008073.1 | 8669   | 0.55 |
| Hybrids | NKXS01008073.1 | 8749   | 0.55 |
| Hybrids | NKXS01008303.1 | 1137   | 0.55 |
| Hybrids | NKXS01009549.1 | 511    | 0.55 |
| Hybrids | NKXS01000003.1 | 6136   | 0.45 |
| Hybrids | NKXS01000006.1 | 229457 | 0.45 |
| Hybrids | NKXS01000006.1 | 31429  | 0.45 |
| Hybrids | NKXS01000017.1 | 167473 | 0.45 |
| Hybrids | NKXS01000017.1 | 89869  | 0.45 |
| Hybrids | NKXS01000017.1 | 89971  | 0.45 |
| Hybrids | NKXS01000021.1 | 211213 | 0.45 |
| Hybrids | NKXS01000021.1 | 211343 | 0.45 |
| Hybrids | NKXS01000050.1 | 217584 | 0.45 |
| Hybrids | NKXS01000051.1 | 215773 | 0.45 |
| Hybrids | NKXS01000070.1 | 7111   | 0.45 |
| Hybrids | NKXS01000071.1 | 137732 | 0.45 |
| Hybrids | NKXS01000071.1 | 137779 | 0.45 |
| Hybrids | NKXS01000094.1 | 113226 | 0.45 |
| Hybrids | NKXS01000097.1 | 67723  | 0.45 |

|         |                |        |      |
|---------|----------------|--------|------|
| Hybrids | NKXS01000097.1 | 67734  | 0.45 |
| Hybrids | NKXS01000097.1 | 67743  | 0.45 |
| Hybrids | NKXS01000118.1 | 57374  | 0.45 |
| Hybrids | NKXS01000119.1 | 8677   | 0.45 |
| Hybrids | NKXS01000132.1 | 19365  | 0.45 |
| Hybrids | NKXS01000144.1 | 9684   | 0.45 |
| Hybrids | NKXS01000144.1 | 9711   | 0.45 |
| Hybrids | NKXS01000144.1 | 9810   | 0.45 |
| Hybrids | NKXS01000147.1 | 91518  | 0.45 |
| Hybrids | NKXS01000147.1 | 91542  | 0.45 |
| Hybrids | NKXS01000147.1 | 91592  | 0.45 |
| Hybrids | NKXS01000147.1 | 91691  | 0.45 |
| Hybrids | NKXS01000172.1 | 89166  | 0.45 |
| Hybrids | NKXS01000172.1 | 89268  | 0.45 |
| Hybrids | NKXS01000174.1 | 5186   | 0.45 |
| Hybrids | NKXS01000174.1 | 5248   | 0.45 |
| Hybrids | NKXS01000175.1 | 79589  | 0.45 |
| Hybrids | NKXS01000181.1 | 128673 | 0.45 |
| Hybrids | NKXS01000199.1 | 176954 | 0.45 |
| Hybrids | NKXS01000199.1 | 177035 | 0.45 |
| Hybrids | NKXS01000199.1 | 177145 | 0.45 |
| Hybrids | NKXS01000241.1 | 186195 | 0.45 |
| Hybrids | NKXS01000241.1 | 192843 | 0.45 |
| Hybrids | NKXS01000244.1 | 124739 | 0.45 |
| Hybrids | NKXS01000244.1 | 124791 | 0.45 |
| Hybrids | NKXS01000259.1 | 45603  | 0.45 |
| Hybrids | NKXS01000259.1 | 45626  | 0.45 |
| Hybrids | NKXS01000278.1 | 104443 | 0.45 |
| Hybrids | NKXS01000278.1 | 104554 | 0.45 |
| Hybrids | NKXS01000278.1 | 104619 | 0.45 |
| Hybrids | NKXS01000278.1 | 104654 | 0.45 |
| Hybrids | NKXS01000278.1 | 65099  | 0.45 |
| Hybrids | NKXS01000288.1 | 125098 | 0.45 |
| Hybrids | NKXS01000290.1 | 129161 | 0.45 |
| Hybrids | NKXS01000293.1 | 13924  | 0.45 |
| Hybrids | NKXS01000293.1 | 14076  | 0.45 |
| Hybrids | NKXS01000296.1 | 2471   | 0.45 |
| Hybrids | NKXS01000315.1 | 50824  | 0.45 |
| Hybrids | NKXS01000322.1 | 29642  | 0.45 |
| Hybrids | NKXS01000322.1 | 29666  | 0.45 |
| Hybrids | NKXS01000329.1 | 5883   | 0.45 |
| Hybrids | NKXS01000339.1 | 186180 | 0.45 |
| Hybrids | NKXS01000359.1 | 183493 | 0.45 |
| Hybrids | NKXS01000364.1 | 111033 | 0.45 |

|         |                |        |      |
|---------|----------------|--------|------|
| Hybrids | NKXS01000368.1 | 683    | 0.45 |
| Hybrids | NKXS01000368.1 | 736    | 0.45 |
| Hybrids | NKXS01000368.1 | 754    | 0.45 |
| Hybrids | NKXS01000368.1 | 755    | 0.45 |
| Hybrids | NKXS01000437.1 | 5982   | 0.45 |
| Hybrids | NKXS01000437.1 | 6097   | 0.45 |
| Hybrids | NKXS01000437.1 | 6101   | 0.45 |
| Hybrids | NKXS01000437.1 | 6112   | 0.45 |
| Hybrids | NKXS01000437.1 | 6129   | 0.45 |
| Hybrids | NKXS01000437.1 | 6132   | 0.45 |
| Hybrids | NKXS01000454.1 | 122018 | 0.45 |
| Hybrids | NKXS01000455.1 | 123777 | 0.45 |
| Hybrids | NKXS01000455.1 | 123812 | 0.45 |
| Hybrids | NKXS01000485.1 | 35709  | 0.45 |
| Hybrids | NKXS01000493.1 | 10165  | 0.45 |
| Hybrids | NKXS01000517.1 | 129960 | 0.45 |
| Hybrids | NKXS01000517.1 | 129994 | 0.45 |
| Hybrids | NKXS01000517.1 | 130199 | 0.45 |
| Hybrids | NKXS01000546.1 | 25169  | 0.45 |
| Hybrids | NKXS01000546.1 | 25243  | 0.45 |
| Hybrids | NKXS01000552.1 | 38092  | 0.45 |
| Hybrids | NKXS01000552.1 | 38104  | 0.45 |
| Hybrids | NKXS01000558.1 | 180392 | 0.45 |
| Hybrids | NKXS01000584.1 | 9457   | 0.45 |
| Hybrids | NKXS01000584.1 | 9547   | 0.45 |
| Hybrids | NKXS01000600.1 | 280466 | 0.45 |
| Hybrids | NKXS01000610.1 | 45226  | 0.45 |
| Hybrids | NKXS01000633.1 | 56099  | 0.45 |
| Hybrids | NKXS01000633.1 | 56110  | 0.45 |
| Hybrids | NKXS01000633.1 | 56287  | 0.45 |
| Hybrids | NKXS01000633.1 | 56295  | 0.45 |
| Hybrids | NKXS01000654.1 | 39177  | 0.45 |
| Hybrids | NKXS01000654.1 | 39228  | 0.45 |
| Hybrids | NKXS01000654.1 | 39343  | 0.45 |
| Hybrids | NKXS01000655.1 | 56430  | 0.45 |
| Hybrids | NKXS01000655.1 | 56576  | 0.45 |
| Hybrids | NKXS01000655.1 | 56621  | 0.45 |
| Hybrids | NKXS01000655.1 | 56647  | 0.45 |
| Hybrids | NKXS01000662.1 | 95793  | 0.45 |
| Hybrids | NKXS01000662.1 | 95949  | 0.45 |
| Hybrids | NKXS01000662.1 | 95977  | 0.45 |
| Hybrids | NKXS01000670.1 | 101418 | 0.45 |
| Hybrids | NKXS01000672.1 | 10223  | 0.45 |
| Hybrids | NKXS01000686.1 | 16717  | 0.45 |



|         |                |        |      |
|---------|----------------|--------|------|
| Hybrids | NKXS01000686.1 | 16868  | 0.45 |
| Hybrids | NKXS01000686.1 | 16916  | 0.45 |
| Hybrids | NKXS01000699.1 | 166254 | 0.45 |
| Hybrids | NKXS01000703.1 | 44195  | 0.45 |
| Hybrids | NKXS01000711.1 | 113576 | 0.45 |
| Hybrids | NKXS01000770.1 | 97897  | 0.45 |
| Hybrids | NKXS01000775.1 | 111680 | 0.45 |
| Hybrids | NKXS01000775.1 | 111766 | 0.45 |
| Hybrids | NKXS01000778.1 | 246494 | 0.45 |
| Hybrids | NKXS01000782.1 | 80638  | 0.45 |
| Hybrids | NKXS01000782.1 | 80697  | 0.45 |
| Hybrids | NKXS01000782.1 | 80790  | 0.45 |
| Hybrids | NKXS01000796.1 | 52929  | 0.45 |
| Hybrids | NKXS01000820.1 | 104785 | 0.45 |
| Hybrids | NKXS01000820.1 | 104864 | 0.45 |
| Hybrids | NKXS01000852.1 | 107284 | 0.45 |
| Hybrids | NKXS01000852.1 | 110531 | 0.45 |
| Hybrids | NKXS01000858.1 | 11134  | 0.45 |
| Hybrids | NKXS01000867.1 | 93368  | 0.45 |
| Hybrids | NKXS01000867.1 | 93403  | 0.45 |
| Hybrids | NKXS01000867.1 | 93517  | 0.45 |
| Hybrids | NKXS01000867.1 | 95862  | 0.45 |
| Hybrids | NKXS01000867.1 | 95893  | 0.45 |
| Hybrids | NKXS01000890.1 | 134403 | 0.45 |
| Hybrids | NKXS01000905.1 | 102567 | 0.45 |
| Hybrids | NKXS01000905.1 | 102578 | 0.45 |
| Hybrids | NKXS01000905.1 | 102580 | 0.45 |
| Hybrids | NKXS01000905.1 | 102608 | 0.45 |
| Hybrids | NKXS01000905.1 | 102651 | 0.45 |
| Hybrids | NKXS01000927.1 | 91081  | 0.45 |
| Hybrids | NKXS01000956.1 | 9370   | 0.45 |
| Hybrids | NKXS01000956.1 | 9374   | 0.45 |
| Hybrids | NKXS01000956.1 | 9596   | 0.45 |
| Hybrids | NKXS01000960.1 | 90691  | 0.45 |
| Hybrids | NKXS01000963.1 | 28152  | 0.45 |
| Hybrids | NKXS01001059.1 | 139778 | 0.45 |
| Hybrids | NKXS01001062.1 | 123312 | 0.45 |
| Hybrids | NKXS01001085.1 | 39345  | 0.45 |
| Hybrids | NKXS01001085.1 | 39458  | 0.45 |
| Hybrids | NKXS01001085.1 | 39527  | 0.45 |
| Hybrids | NKXS01001087.1 | 107200 | 0.45 |
| Hybrids | NKXS01001127.1 | 45852  | 0.45 |
| Hybrids | NKXS01001134.1 | 14416  | 0.45 |
| Hybrids | NKXS01001134.1 | 14446  | 0.45 |

|         |                |        |      |
|---------|----------------|--------|------|
| Hybrids | NKXS01001144.1 | 2616   | 0.45 |
| Hybrids | NKXS01001153.1 | 62985  | 0.45 |
| Hybrids | NKXS01001211.1 | 24840  | 0.45 |
| Hybrids | NKXS01001211.1 | 24843  | 0.45 |
| Hybrids | NKXS01001212.1 | 89022  | 0.45 |
| Hybrids | NKXS01001220.1 | 90037  | 0.45 |
| Hybrids | NKXS01001220.1 | 90119  | 0.45 |
| Hybrids | NKXS01001232.1 | 49562  | 0.45 |
| Hybrids | NKXS01001232.1 | 49606  | 0.45 |
| Hybrids | NKXS01001232.1 | 75898  | 0.45 |
| Hybrids | NKXS01001232.1 | 76041  | 0.45 |
| Hybrids | NKXS01001279.1 | 32300  | 0.45 |
| Hybrids | NKXS01001281.1 | 17353  | 0.45 |
| Hybrids | NKXS01001283.1 | 48729  | 0.45 |
| Hybrids | NKXS01001283.1 | 48737  | 0.45 |
| Hybrids | NKXS01001283.1 | 48855  | 0.45 |
| Hybrids | NKXS01001289.1 | 55467  | 0.45 |
| Hybrids | NKXS01001306.1 | 41438  | 0.45 |
| Hybrids | NKXS01001306.1 | 41447  | 0.45 |
| Hybrids | NKXS01001306.1 | 41501  | 0.45 |
| Hybrids | NKXS01001312.1 | 89319  | 0.45 |
| Hybrids | NKXS01001312.1 | 89354  | 0.45 |
| Hybrids | NKXS01001312.1 | 89358  | 0.45 |
| Hybrids | NKXS01001312.1 | 89364  | 0.45 |
| Hybrids | NKXS01001312.1 | 89398  | 0.45 |
| Hybrids | NKXS01001312.1 | 89416  | 0.45 |
| Hybrids | NKXS01001312.1 | 89446  | 0.45 |
| Hybrids | NKXS01001312.1 | 89447  | 0.45 |
| Hybrids | NKXS01001312.1 | 89452  | 0.45 |
| Hybrids | NKXS01001329.1 | 96554  | 0.45 |
| Hybrids | NKXS01001337.1 | 16209  | 0.45 |
| Hybrids | NKXS01001366.1 | 33857  | 0.45 |
| Hybrids | NKXS01001366.1 | 33858  | 0.45 |
| Hybrids | NKXS01001366.1 | 34001  | 0.45 |
| Hybrids | NKXS01001366.1 | 34003  | 0.45 |
| Hybrids | NKXS01001400.1 | 10077  | 0.45 |
| Hybrids | NKXS01001446.1 | 56199  | 0.45 |
| Hybrids | NKXS01001446.1 | 56276  | 0.45 |
| Hybrids | NKXS01001449.1 | 65945  | 0.45 |
| Hybrids | NKXS01001449.1 | 65965  | 0.45 |
| Hybrids | NKXS01001454.1 | 31633  | 0.45 |
| Hybrids | NKXS01001495.1 | 108648 | 0.45 |
| Hybrids | NKXS01001495.1 | 108959 | 0.45 |
| Hybrids | NKXS01001502.1 | 102508 | 0.45 |

|         |                |        |      |
|---------|----------------|--------|------|
| Hybrids | NKXS01001502.1 | 102554 | 0.45 |
| Hybrids | NKXS01001516.1 | 27298  | 0.45 |
| Hybrids | NKXS01001525.1 | 56965  | 0.45 |
| Hybrids | NKXS01001528.1 | 22162  | 0.45 |
| Hybrids | NKXS01001573.1 | 3816   | 0.45 |
| Hybrids | NKXS01001610.1 | 87920  | 0.45 |
| Hybrids | NKXS01001610.1 | 88069  | 0.45 |
| Hybrids | NKXS01001621.1 | 34733  | 0.45 |
| Hybrids | NKXS01001621.1 | 34812  | 0.45 |
| Hybrids | NKXS01001622.1 | 25484  | 0.45 |
| Hybrids | NKXS01001639.1 | 5267   | 0.45 |
| Hybrids | NKXS01001639.1 | 5291   | 0.45 |
| Hybrids | NKXS01001639.1 | 5338   | 0.45 |
| Hybrids | NKXS01001639.1 | 5341   | 0.45 |
| Hybrids | NKXS01001639.1 | 5372   | 0.45 |
| Hybrids | NKXS01001639.1 | 5386   | 0.45 |
| Hybrids | NKXS01001647.1 | 61444  | 0.45 |
| Hybrids | NKXS01001647.1 | 61537  | 0.45 |
| Hybrids | NKXS01001687.1 | 71018  | 0.45 |
| Hybrids | NKXS01001697.1 | 95371  | 0.45 |
| Hybrids | NKXS01001744.1 | 121764 | 0.45 |
| Hybrids | NKXS01001744.1 | 121932 | 0.45 |
| Hybrids | NKXS01001777.1 | 28648  | 0.45 |
| Hybrids | NKXS01001777.1 | 28721  | 0.45 |
| Hybrids | NKXS01001790.1 | 154156 | 0.45 |
| Hybrids | NKXS01001790.1 | 154293 | 0.45 |
| Hybrids | NKXS01001802.1 | 12141  | 0.45 |
| Hybrids | NKXS01001817.1 | 26310  | 0.45 |
| Hybrids | NKXS01001893.1 | 23308  | 0.45 |
| Hybrids | NKXS01001896.1 | 16829  | 0.45 |
| Hybrids | NKXS01001896.1 | 16976  | 0.45 |
| Hybrids | NKXS01001901.1 | 11653  | 0.45 |
| Hybrids | NKXS01001920.1 | 37428  | 0.45 |
| Hybrids | NKXS01001920.1 | 37503  | 0.45 |
| Hybrids | NKXS01001920.1 | 37596  | 0.45 |
| Hybrids | NKXS01001920.1 | 37681  | 0.45 |
| Hybrids | NKXS01001920.1 | 37692  | 0.45 |
| Hybrids | NKXS01001920.1 | 37695  | 0.45 |
| Hybrids | NKXS01001924.1 | 105081 | 0.45 |
| Hybrids | NKXS01001935.1 | 45650  | 0.45 |
| Hybrids | NKXS01001938.1 | 20194  | 0.45 |
| Hybrids | NKXS01001938.1 | 20215  | 0.45 |
| Hybrids | NKXS01001938.1 | 20288  | 0.45 |
| Hybrids | NKXS01001938.1 | 20394  | 0.45 |

|         |                |        |      |
|---------|----------------|--------|------|
| Hybrids | NKXS01001957.1 | 8328   | 0.45 |
| Hybrids | NKXS01001991.1 | 5375   | 0.45 |
| Hybrids | NKXS01001991.1 | 5400   | 0.45 |
| Hybrids | NKXS01001995.1 | 112623 | 0.45 |
| Hybrids | NKXS01002016.1 | 115403 | 0.45 |
| Hybrids | NKXS01002016.1 | 115461 | 0.45 |
| Hybrids | NKXS01002016.1 | 115496 | 0.45 |
| Hybrids | NKXS01002016.1 | 115557 | 0.45 |
| Hybrids | NKXS01002016.1 | 115619 | 0.45 |
| Hybrids | NKXS01002052.1 | 134917 | 0.45 |
| Hybrids | NKXS01002052.1 | 135105 | 0.45 |
| Hybrids | NKXS01002052.1 | 57102  | 0.45 |
| Hybrids | NKXS01002063.1 | 53613  | 0.45 |
| Hybrids | NKXS01002066.1 | 20516  | 0.45 |
| Hybrids | NKXS01002066.1 | 20525  | 0.45 |
| Hybrids | NKXS01002148.1 | 56986  | 0.45 |
| Hybrids | NKXS01002171.1 | 33865  | 0.45 |
| Hybrids | NKXS01002196.1 | 20216  | 0.45 |
| Hybrids | NKXS01002196.1 | 20273  | 0.45 |
| Hybrids | NKXS01002196.1 | 20325  | 0.45 |
| Hybrids | NKXS01002196.1 | 20393  | 0.45 |
| Hybrids | NKXS01002196.1 | 36954  | 0.45 |
| Hybrids | NKXS01002216.1 | 18438  | 0.45 |
| Hybrids | NKXS01002228.1 | 87259  | 0.45 |
| Hybrids | NKXS01002228.1 | 87341  | 0.45 |
| Hybrids | NKXS01002228.1 | 87401  | 0.45 |
| Hybrids | NKXS01002276.1 | 90122  | 0.45 |
| Hybrids | NKXS01002276.1 | 90348  | 0.45 |
| Hybrids | NKXS01002282.1 | 36136  | 0.45 |
| Hybrids | NKXS01002288.1 | 1928   | 0.45 |
| Hybrids | NKXS01002288.1 | 2022   | 0.45 |
| Hybrids | NKXS01002288.1 | 2059   | 0.45 |
| Hybrids | NKXS01002288.1 | 2060   | 0.45 |
| Hybrids | NKXS01002288.1 | 2108   | 0.45 |
| Hybrids | NKXS01002301.1 | 30926  | 0.45 |
| Hybrids | NKXS01002321.1 | 126647 | 0.45 |
| Hybrids | NKXS01002330.1 | 66846  | 0.45 |
| Hybrids | NKXS01002330.1 | 66850  | 0.45 |
| Hybrids | NKXS01002343.1 | 2133   | 0.45 |
| Hybrids | NKXS01002349.1 | 27698  | 0.45 |
| Hybrids | NKXS01002349.1 | 27748  | 0.45 |
| Hybrids | NKXS01002352.1 | 42790  | 0.45 |
| Hybrids | NKXS01002352.1 | 42860  | 0.45 |
| Hybrids | NKXS01002364.1 | 5485   | 0.45 |

|         |                |        |      |
|---------|----------------|--------|------|
| Hybrids | NKXS01002382.1 | 73920  | 0.45 |
| Hybrids | NKXS01002382.1 | 74046  | 0.45 |
| Hybrids | NKXS01002400.1 | 61733  | 0.45 |
| Hybrids | NKXS01002490.1 | 38380  | 0.45 |
| Hybrids | NKXS01002490.1 | 58151  | 0.45 |
| Hybrids | NKXS01002502.1 | 65863  | 0.45 |
| Hybrids | NKXS01002502.1 | 65928  | 0.45 |
| Hybrids | NKXS01002518.1 | 9122   | 0.45 |
| Hybrids | NKXS01002545.1 | 6239   | 0.45 |
| Hybrids | NKXS01002555.1 | 33087  | 0.45 |
| Hybrids | NKXS01002555.1 | 33214  | 0.45 |
| Hybrids | NKXS01002555.1 | 33240  | 0.45 |
| Hybrids | NKXS01002555.1 | 35238  | 0.45 |
| Hybrids | NKXS01002606.1 | 85048  | 0.45 |
| Hybrids | NKXS01002623.1 | 13560  | 0.45 |
| Hybrids | NKXS01002646.1 | 41003  | 0.45 |
| Hybrids | NKXS01002675.1 | 67021  | 0.45 |
| Hybrids | NKXS01002675.1 | 67050  | 0.45 |
| Hybrids | NKXS01002675.1 | 67064  | 0.45 |
| Hybrids | NKXS01002675.1 | 67189  | 0.45 |
| Hybrids | NKXS01002675.1 | 67244  | 0.45 |
| Hybrids | NKXS01002687.1 | 15758  | 0.45 |
| Hybrids | NKXS01002705.1 | 210400 | 0.45 |
| Hybrids | NKXS01002705.1 | 210406 | 0.45 |
| Hybrids | NKXS01002705.1 | 210588 | 0.45 |
| Hybrids | NKXS01002705.1 | 210609 | 0.45 |
| Hybrids | NKXS01002730.1 | 26512  | 0.45 |
| Hybrids | NKXS01002730.1 | 50287  | 0.45 |
| Hybrids | NKXS01002767.1 | 37803  | 0.45 |
| Hybrids | NKXS01002767.1 | 37852  | 0.45 |
| Hybrids | NKXS01002782.1 | 8250   | 0.45 |
| Hybrids | NKXS01002782.1 | 8343   | 0.45 |
| Hybrids | NKXS01002822.1 | 10403  | 0.45 |
| Hybrids | NKXS01002823.1 | 26473  | 0.45 |
| Hybrids | NKXS01002852.1 | 29230  | 0.45 |
| Hybrids | NKXS01002866.1 | 46436  | 0.45 |
| Hybrids | NKXS01002879.1 | 23264  | 0.45 |
| Hybrids | NKXS01002938.1 | 53009  | 0.45 |
| Hybrids | NKXS01002938.1 | 53020  | 0.45 |
| Hybrids | NKXS01002938.1 | 53024  | 0.45 |
| Hybrids | NKXS01002938.1 | 53057  | 0.45 |
| Hybrids | NKXS01002938.1 | 53058  | 0.45 |
| Hybrids | NKXS01002938.1 | 53084  | 0.45 |
| Hybrids | NKXS01002941.1 | 14389  | 0.45 |

|         |                |       |      |
|---------|----------------|-------|------|
| Hybrids | NKXS01002982.1 | 8070  | 0.45 |
| Hybrids | NKXS01002982.1 | 8096  | 0.45 |
| Hybrids | NKXS01002982.1 | 8131  | 0.45 |
| Hybrids | NKXS01003001.1 | 67458 | 0.45 |
| Hybrids | NKXS01003004.1 | 76690 | 0.45 |
| Hybrids | NKXS01003013.1 | 1994  | 0.45 |
| Hybrids | NKXS01003120.1 | 5030  | 0.45 |
| Hybrids | NKXS01003134.1 | 66992 | 0.45 |
| Hybrids | NKXS01003242.1 | 22647 | 0.45 |
| Hybrids | NKXS01003260.1 | 11385 | 0.45 |
| Hybrids | NKXS01003260.1 | 11386 | 0.45 |
| Hybrids | NKXS01003271.1 | 69807 | 0.45 |
| Hybrids | NKXS01003275.1 | 40466 | 0.45 |
| Hybrids | NKXS01003275.1 | 40501 | 0.45 |
| Hybrids | NKXS01003324.1 | 25735 | 0.45 |
| Hybrids | NKXS01003324.1 | 25865 | 0.45 |
| Hybrids | NKXS01003327.1 | 46441 | 0.45 |
| Hybrids | NKXS01003344.1 | 24368 | 0.45 |
| Hybrids | NKXS01003344.1 | 24627 | 0.45 |
| Hybrids | NKXS01003413.1 | 977   | 0.45 |
| Hybrids | NKXS01003414.1 | 27014 | 0.45 |
| Hybrids | NKXS01003414.1 | 27020 | 0.45 |
| Hybrids | NKXS01003414.1 | 27032 | 0.45 |
| Hybrids | NKXS01003480.1 | 9656  | 0.45 |
| Hybrids | NKXS01003599.1 | 2518  | 0.45 |
| Hybrids | NKXS01003612.1 | 26889 | 0.45 |
| Hybrids | NKXS01003612.1 | 26893 | 0.45 |
| Hybrids | NKXS01003645.1 | 11917 | 0.45 |
| Hybrids | NKXS01003645.1 | 11930 | 0.45 |
| Hybrids | NKXS01003645.1 | 12062 | 0.45 |
| Hybrids | NKXS01003646.1 | 74479 | 0.45 |
| Hybrids | NKXS01003657.1 | 73829 | 0.45 |
| Hybrids | NKXS01003685.1 | 90899 | 0.45 |
| Hybrids | NKXS01003712.1 | 33772 | 0.45 |
| Hybrids | NKXS01003766.1 | 8857  | 0.45 |
| Hybrids | NKXS01003775.1 | 20409 | 0.45 |
| Hybrids | NKXS01003783.1 | 36227 | 0.45 |
| Hybrids | NKXS01003783.1 | 36253 | 0.45 |
| Hybrids | NKXS01003787.1 | 6147  | 0.45 |
| Hybrids | NKXS01003823.1 | 44723 | 0.45 |
| Hybrids | NKXS01003829.1 | 32889 | 0.45 |
| Hybrids | NKXS01003829.1 | 32891 | 0.45 |
| Hybrids | NKXS01003829.1 | 32908 | 0.45 |
| Hybrids | NKXS01003829.1 | 33112 | 0.45 |

|         |                |        |      |
|---------|----------------|--------|------|
| Hybrids | NKXS01003837.1 | 67618  | 0.45 |
| Hybrids | NKXS01003868.1 | 106860 | 0.45 |
| Hybrids | NKXS01003868.1 | 106861 | 0.45 |
| Hybrids | NKXS01003876.1 | 40355  | 0.45 |
| Hybrids | NKXS01003878.1 | 17098  | 0.45 |
| Hybrids | NKXS01003925.1 | 28371  | 0.45 |
| Hybrids | NKXS01003929.1 | 51221  | 0.45 |
| Hybrids | NKXS01003955.1 | 38712  | 0.45 |
| Hybrids | NKXS01003959.1 | 90459  | 0.45 |
| Hybrids | NKXS01003982.1 | 26886  | 0.45 |
| Hybrids | NKXS01004037.1 | 70009  | 0.45 |
| Hybrids | NKXS01004050.1 | 14028  | 0.45 |
| Hybrids | NKXS01004069.1 | 81720  | 0.45 |
| Hybrids | NKXS01004076.1 | 32898  | 0.45 |
| Hybrids | NKXS01004107.1 | 37530  | 0.45 |
| Hybrids | NKXS01004117.1 | 625    | 0.45 |
| Hybrids | NKXS01004117.1 | 746    | 0.45 |
| Hybrids | NKXS01004117.1 | 801    | 0.45 |
| Hybrids | NKXS01004117.1 | 839    | 0.45 |
| Hybrids | NKXS01004117.1 | 862    | 0.45 |
| Hybrids | NKXS01004122.1 | 59308  | 0.45 |
| Hybrids | NKXS01004184.1 | 74604  | 0.45 |
| Hybrids | NKXS01004184.1 | 74646  | 0.45 |
| Hybrids | NKXS01004217.1 | 12945  | 0.45 |
| Hybrids | NKXS01004217.1 | 12960  | 0.45 |
| Hybrids | NKXS01004218.1 | 23905  | 0.45 |
| Hybrids | NKXS01004263.1 | 52023  | 0.45 |
| Hybrids | NKXS01004283.1 | 63266  | 0.45 |
| Hybrids | NKXS01004300.1 | 49949  | 0.45 |
| Hybrids | NKXS01004300.1 | 50079  | 0.45 |
| Hybrids | NKXS01004320.1 | 45523  | 0.45 |
| Hybrids | NKXS01004324.1 | 24856  | 0.45 |
| Hybrids | NKXS01004324.1 | 25064  | 0.45 |
| Hybrids | NKXS01004338.1 | 18096  | 0.45 |
| Hybrids | NKXS01004379.1 | 62883  | 0.45 |
| Hybrids | NKXS01004379.1 | 62947  | 0.45 |
| Hybrids | NKXS01004379.1 | 63057  | 0.45 |
| Hybrids | NKXS01004379.1 | 63088  | 0.45 |
| Hybrids | NKXS01004390.1 | 62217  | 0.45 |
| Hybrids | NKXS01004402.1 | 76749  | 0.45 |
| Hybrids | NKXS01004402.1 | 76770  | 0.45 |
| Hybrids | NKXS01004411.1 | 19861  | 0.45 |
| Hybrids | NKXS01004420.1 | 24289  | 0.45 |
| Hybrids | NKXS01004421.1 | 46175  | 0.45 |

|         |                |       |      |
|---------|----------------|-------|------|
| Hybrids | NKXS01004421.1 | 46210 | 0.45 |
| Hybrids | NKXS01004437.1 | 14687 | 0.45 |
| Hybrids | NKXS01004437.1 | 14732 | 0.45 |
| Hybrids | NKXS01004437.1 | 14827 | 0.45 |
| Hybrids | NKXS01004473.1 | 7268  | 0.45 |
| Hybrids | NKXS01004513.1 | 34048 | 0.45 |
| Hybrids | NKXS01004515.1 | 36860 | 0.45 |
| Hybrids | NKXS01004536.1 | 19436 | 0.45 |
| Hybrids | NKXS01004539.1 | 1387  | 0.45 |
| Hybrids | NKXS01004539.1 | 1427  | 0.45 |
| Hybrids | NKXS01004539.1 | 1502  | 0.45 |
| Hybrids | NKXS01004570.1 | 17336 | 0.45 |
| Hybrids | NKXS01004570.1 | 17349 | 0.45 |
| Hybrids | NKXS01004579.1 | 41369 | 0.45 |
| Hybrids | NKXS01004583.1 | 13663 | 0.45 |
| Hybrids | NKXS01004626.1 | 8659  | 0.45 |
| Hybrids | NKXS01004626.1 | 8682  | 0.45 |
| Hybrids | NKXS01004626.1 | 8688  | 0.45 |
| Hybrids | NKXS01004626.1 | 8841  | 0.45 |
| Hybrids | NKXS01004626.1 | 8860  | 0.45 |
| Hybrids | NKXS01004639.1 | 12246 | 0.45 |
| Hybrids | NKXS01004639.1 | 12256 | 0.45 |
| Hybrids | NKXS01004639.1 | 12265 | 0.45 |
| Hybrids | NKXS01004645.1 | 235   | 0.45 |
| Hybrids | NKXS01004673.1 | 21936 | 0.45 |
| Hybrids | NKXS01004673.1 | 22004 | 0.45 |
| Hybrids | NKXS01004673.1 | 22041 | 0.45 |
| Hybrids | NKXS01004673.1 | 22155 | 0.45 |
| Hybrids | NKXS01004801.1 | 28699 | 0.45 |
| Hybrids | NKXS01004801.1 | 28828 | 0.45 |
| Hybrids | NKXS01004803.1 | 22860 | 0.45 |
| Hybrids | NKXS01004812.1 | 29654 | 0.45 |
| Hybrids | NKXS01004826.1 | 72358 | 0.45 |
| Hybrids | NKXS01004914.1 | 53130 | 0.45 |
| Hybrids | NKXS01004944.1 | 44901 | 0.45 |
| Hybrids | NKXS01004951.1 | 20839 | 0.45 |
| Hybrids | NKXS01004980.1 | 51183 | 0.45 |
| Hybrids | NKXS01005005.1 | 34890 | 0.45 |
| Hybrids | NKXS01005005.1 | 34968 | 0.45 |
| Hybrids | NKXS01005005.1 | 35121 | 0.45 |
| Hybrids | NKXS01005050.1 | 54774 | 0.45 |
| Hybrids | NKXS01005129.1 | 25095 | 0.45 |
| Hybrids | NKXS01005135.1 | 12434 | 0.45 |
| Hybrids | NKXS01005135.1 | 12498 | 0.45 |



|         |                |       |      |
|---------|----------------|-------|------|
| Hybrids | NKXS01005172.1 | 42516 | 0.45 |
| Hybrids | NKXS01005218.1 | 41431 | 0.45 |
| Hybrids | NKXS01005218.1 | 41479 | 0.45 |
| Hybrids | NKXS01005236.1 | 12327 | 0.45 |
| Hybrids | NKXS01005236.1 | 12523 | 0.45 |
| Hybrids | NKXS01005236.1 | 12558 | 0.45 |
| Hybrids | NKXS01005245.1 | 10074 | 0.45 |
| Hybrids | NKXS01005269.1 | 24667 | 0.45 |
| Hybrids | NKXS01005296.1 | 33540 | 0.45 |
| Hybrids | NKXS01005301.1 | 32618 | 0.45 |
| Hybrids | NKXS01005434.1 | 3360  | 0.45 |
| Hybrids | NKXS01005539.1 | 27429 | 0.45 |
| Hybrids | NKXS01005539.1 | 27510 | 0.45 |
| Hybrids | NKXS01005541.1 | 11630 | 0.45 |
| Hybrids | NKXS01005541.1 | 11678 | 0.45 |
| Hybrids | NKXS01005541.1 | 11729 | 0.45 |
| Hybrids | NKXS01005541.1 | 11760 | 0.45 |
| Hybrids | NKXS01005541.1 | 15776 | 0.45 |
| Hybrids | NKXS01005595.1 | 20296 | 0.45 |
| Hybrids | NKXS01005600.1 | 49895 | 0.45 |
| Hybrids | NKXS01005600.1 | 49901 | 0.45 |
| Hybrids | NKXS01005698.1 | 37830 | 0.45 |
| Hybrids | NKXS01005789.1 | 10630 | 0.45 |
| Hybrids | NKXS01005789.1 | 10664 | 0.45 |
| Hybrids | NKXS01005789.1 | 10682 | 0.45 |
| Hybrids | NKXS01005806.1 | 2438  | 0.45 |
| Hybrids | NKXS01005969.1 | 11185 | 0.45 |
| Hybrids | NKXS01005969.1 | 11229 | 0.45 |
| Hybrids | NKXS01005969.1 | 11243 | 0.45 |
| Hybrids | NKXS01005969.1 | 11247 | 0.45 |
| Hybrids | NKXS01005969.1 | 11257 | 0.45 |
| Hybrids | NKXS01005969.1 | 11289 | 0.45 |
| Hybrids | NKXS01005969.1 | 11305 | 0.45 |
| Hybrids | NKXS01005969.1 | 11308 | 0.45 |
| Hybrids | NKXS01005969.1 | 11322 | 0.45 |
| Hybrids | NKXS01005969.1 | 11372 | 0.45 |
| Hybrids | NKXS01006013.1 | 9289  | 0.45 |
| Hybrids | NKXS01006020.1 | 2685  | 0.45 |
| Hybrids | NKXS01006038.1 | 24264 | 0.45 |
| Hybrids | NKXS01006038.1 | 24273 | 0.45 |
| Hybrids | NKXS01006038.1 | 24294 | 0.45 |
| Hybrids | NKXS01006038.1 | 24311 | 0.45 |
| Hybrids | NKXS01006038.1 | 24363 | 0.45 |
| Hybrids | NKXS01006038.1 | 24378 | 0.45 |

|         |                |       |      |
|---------|----------------|-------|------|
| Hybrids | NKXS01006038.1 | 24411 | 0.45 |
| Hybrids | NKXS01006038.1 | 24419 | 0.45 |
| Hybrids | NKXS01006038.1 | 24426 | 0.45 |
| Hybrids | NKXS01006038.1 | 24432 | 0.45 |
| Hybrids | NKXS01006038.1 | 24459 | 0.45 |
| Hybrids | NKXS01006038.1 | 24489 | 0.45 |
| Hybrids | NKXS01006071.1 | 37902 | 0.45 |
| Hybrids | NKXS01006071.1 | 37931 | 0.45 |
| Hybrids | NKXS01006071.1 | 37998 | 0.45 |
| Hybrids | NKXS01006071.1 | 38093 | 0.45 |
| Hybrids | NKXS01006071.1 | 38122 | 0.45 |
| Hybrids | NKXS01006095.1 | 48591 | 0.45 |
| Hybrids | NKXS01006095.1 | 48678 | 0.45 |
| Hybrids | NKXS01006095.1 | 48820 | 0.45 |
| Hybrids | NKXS01006151.1 | 20590 | 0.45 |
| Hybrids | NKXS01006201.1 | 20251 | 0.45 |
| Hybrids | NKXS01006255.1 | 27791 | 0.45 |
| Hybrids | NKXS01006263.1 | 19981 | 0.45 |
| Hybrids | NKXS01006263.1 | 20048 | 0.45 |
| Hybrids | NKXS01006263.1 | 20127 | 0.45 |
| Hybrids | NKXS01006289.1 | 3043  | 0.45 |
| Hybrids | NKXS01006289.1 | 3047  | 0.45 |
| Hybrids | NKXS01006289.1 | 3055  | 0.45 |
| Hybrids | NKXS01006289.1 | 3074  | 0.45 |
| Hybrids | NKXS01006289.1 | 3076  | 0.45 |
| Hybrids | NKXS01006289.1 | 3169  | 0.45 |
| Hybrids | NKXS01006289.1 | 3175  | 0.45 |
| Hybrids | NKXS01006289.1 | 3220  | 0.45 |
| Hybrids | NKXS01006289.1 | 3229  | 0.45 |
| Hybrids | NKXS01006289.1 | 3246  | 0.45 |
| Hybrids | NKXS01006304.1 | 40864 | 0.45 |
| Hybrids | NKXS01006417.1 | 32086 | 0.45 |
| Hybrids | NKXS01006417.1 | 32162 | 0.45 |
| Hybrids | NKXS01006417.1 | 32301 | 0.45 |
| Hybrids | NKXS01006438.1 | 29488 | 0.45 |
| Hybrids | NKXS01006438.1 | 29489 | 0.45 |
| Hybrids | NKXS01006441.1 | 22871 | 0.45 |
| Hybrids | NKXS01006467.1 | 3436  | 0.45 |
| Hybrids | NKXS01006474.1 | 26254 | 0.45 |
| Hybrids | NKXS01006474.1 | 26307 | 0.45 |
| Hybrids | NKXS01006479.1 | 34402 | 0.45 |
| Hybrids | NKXS01006494.1 | 27129 | 0.45 |
| Hybrids | NKXS01006590.1 | 32286 | 0.45 |
| Hybrids | NKXS01006619.1 | 34772 | 0.45 |

|         |                |       |      |
|---------|----------------|-------|------|
| Hybrids | NKXS01006624.1 | 18997 | 0.45 |
| Hybrids | NKXS01006738.1 | 18179 | 0.45 |
| Hybrids | NKXS01006806.1 | 16474 | 0.45 |
| Hybrids | NKXS01006920.1 | 32202 | 0.45 |
| Hybrids | NKXS01006978.1 | 21540 | 0.45 |
| Hybrids | NKXS01007121.1 | 8633  | 0.45 |
| Hybrids | NKXS01007218.1 | 10292 | 0.45 |
| Hybrids | NKXS01007218.1 | 10359 | 0.45 |
| Hybrids | NKXS01007218.1 | 10369 | 0.45 |
| Hybrids | NKXS01007227.1 | 21587 | 0.45 |
| Hybrids | NKXS01007405.1 | 25202 | 0.45 |
| Hybrids | NKXS01007405.1 | 25203 | 0.45 |
| Hybrids | NKXS01007405.1 | 25391 | 0.45 |
| Hybrids | NKXS01007414.1 | 3394  | 0.45 |
| Hybrids | NKXS01007427.1 | 9460  | 0.45 |
| Hybrids | NKXS01007427.1 | 9487  | 0.45 |
| Hybrids | NKXS01007427.1 | 9526  | 0.45 |
| Hybrids | NKXS01007427.1 | 9609  | 0.45 |
| Hybrids | NKXS01007427.1 | 9664  | 0.45 |
| Hybrids | NKXS01007427.1 | 9699  | 0.45 |
| Hybrids | NKXS01007455.1 | 15398 | 0.45 |
| Hybrids | NKXS01007519.1 | 10913 | 0.45 |
| Hybrids | NKXS01007519.1 | 11041 | 0.45 |
| Hybrids | NKXS01007550.1 | 14847 | 0.45 |
| Hybrids | NKXS01007550.1 | 14904 | 0.45 |
| Hybrids | NKXS01007685.1 | 10137 | 0.45 |
| Hybrids | NKXS01007685.1 | 10141 | 0.45 |
| Hybrids | NKXS01007685.1 | 10156 | 0.45 |
| Hybrids | NKXS01007812.1 | 4352  | 0.45 |
| Hybrids | NKXS01007843.1 | 2058  | 0.45 |
| Hybrids | NKXS01007844.1 | 14133 | 0.45 |
| Hybrids | NKXS01008073.1 | 8657  | 0.45 |
| Hybrids | NKXS01008073.1 | 8661  | 0.45 |
| Hybrids | NKXS01008073.1 | 8783  | 0.45 |
| Hybrids | NKXS01008073.1 | 8792  | 0.45 |
| Hybrids | NKXS01008142.1 | 9767  | 0.45 |
| Hybrids | NKXS01008142.1 | 9851  | 0.45 |
| Hybrids | NKXS01008188.1 | 14538 | 0.45 |
| Hybrids | NKXS01008197.1 | 13331 | 0.45 |
| Hybrids | NKXS01008197.1 | 13662 | 0.45 |
| Hybrids | NKXS01008197.1 | 14198 | 0.45 |
| Hybrids | NKXS01008197.1 | 14227 | 0.45 |
| Hybrids | NKXS01008321.1 | 19027 | 0.45 |
| Hybrids | NKXS01008321.1 | 20034 | 0.45 |

|         |                |       |      |
|---------|----------------|-------|------|
| Hybrids | NKXS01008500.1 | 829   | 0.45 |
| Hybrids | NKXS01008579.1 | 9696  | 0.45 |
| Hybrids | NKXS01008579.1 | 9708  | 0.45 |
| Hybrids | NKXS01008628.1 | 12388 | 0.45 |
| Hybrids | NKXS01008628.1 | 12532 | 0.45 |
| Hybrids | NKXS01008628.1 | 12534 | 0.45 |
| Hybrids | NKXS01008628.1 | 12557 | 0.45 |
| Hybrids | NKXS01008628.1 | 12564 | 0.45 |
| Hybrids | NKXS01008869.1 | 3470  | 0.45 |
| Hybrids | NKXS01008881.1 | 11296 | 0.45 |
| Hybrids | NKXS01008896.1 | 9355  | 0.45 |
| Hybrids | NKXS01008896.1 | 9357  | 0.45 |
| Hybrids | NKXS01008896.1 | 9512  | 0.45 |
| Hybrids | NKXS01008985.1 | 9793  | 0.45 |
| Hybrids | NKXS01009120.1 | 6883  | 0.45 |
| Hybrids | NKXS01009173.1 | 15541 | 0.45 |
| Hybrids | NKXS01009215.1 | 11884 | 0.45 |
| Hybrids | NKXS01009493.1 | 5028  | 0.45 |
| Hybrids | NKXS01009493.1 | 5057  | 0.45 |
| Hybrids | NKXS01009549.1 | 337   | 0.45 |
| Hybrids | NKXS01009549.1 | 348   | 0.45 |
| Hybrids | NKXS01009549.1 | 361   | 0.45 |
| Hybrids | NKXS01009549.1 | 535   | 0.45 |
| Hybrids | NKXS01010296.1 | 2085  | 0.45 |
| Hybrids | NKXS01010391.1 | 2974  | 0.45 |
| Hybrids | NKXS01010391.1 | 3064  | 0.45 |
| Hybrids | NKXS01010391.1 | 3067  | 0.45 |
| Hybrids | NKXS01010411.1 | 4199  | 0.45 |
| Hybrids | NKXS01010513.1 | 176   | 0.45 |
| Hybrids | NKXS01010513.1 | 197   | 0.45 |
| Hybrids | NKXS01010783.1 | 2710  | 0.45 |
| Hybrids | NKXS01010783.1 | 2883  | 0.45 |
| Hybrids | NKXS01011684.1 | 290   | 0.45 |
| Hybrids | NKXS01012054.1 | 497   | 0.45 |
| Hybrids | NKXS01012069.1 | 724   | 0.45 |
| Hybrids | NKXS01012469.1 | 1091  | 0.45 |
| Hybrids | NKXS01012469.1 | 1131  | 0.45 |
| Hybrids | NKXS01012469.1 | 195   | 0.45 |
| Hybrids | NKXS01012469.1 | 893   | 0.45 |
| Hybrids | NKXS01012469.1 | 906   | 0.45 |
| Hybrids | NKXS01012469.1 | 940   | 0.45 |
| Hybrids | NKXS01012469.1 | 970   | 0.45 |
| Hybrids | NKXS01012469.1 | 986   | 0.45 |
| Hybrids | NKXS01000003.1 | 5917  | 0.36 |

|         |                |        |      |
|---------|----------------|--------|------|
| Hybrids | NKXS01000003.1 | 6020   | 0.36 |
| Hybrids | NKXS01000003.1 | 6028   | 0.36 |
| Hybrids | NKXS01000003.1 | 6141   | 0.36 |
| Hybrids | NKXS01000006.1 | 229571 | 0.36 |
| Hybrids | NKXS01000006.1 | 31230  | 0.36 |
| Hybrids | NKXS01000006.1 | 31297  | 0.36 |
| Hybrids | NKXS01000006.1 | 31301  | 0.36 |
| Hybrids | NKXS01000006.1 | 31335  | 0.36 |
| Hybrids | NKXS01000006.1 | 31388  | 0.36 |
| Hybrids | NKXS01000017.1 | 89812  | 0.36 |
| Hybrids | NKXS01000017.1 | 89899  | 0.36 |
| Hybrids | NKXS01000039.1 | 83680  | 0.36 |
| Hybrids | NKXS01000064.1 | 198973 | 0.36 |
| Hybrids | NKXS01000064.1 | 78809  | 0.36 |
| Hybrids | NKXS01000064.1 | 78827  | 0.36 |
| Hybrids | NKXS01000070.1 | 7044   | 0.36 |
| Hybrids | NKXS01000075.1 | 49500  | 0.36 |
| Hybrids | NKXS01000090.1 | 83525  | 0.36 |
| Hybrids | NKXS01000097.1 | 132    | 0.36 |
| Hybrids | NKXS01000097.1 | 252    | 0.36 |
| Hybrids | NKXS01000132.1 | 140446 | 0.36 |
| Hybrids | NKXS01000135.1 | 56090  | 0.36 |
| Hybrids | NKXS01000159.1 | 109173 | 0.36 |
| Hybrids | NKXS01000167.1 | 198777 | 0.36 |
| Hybrids | NKXS01000174.1 | 5101   | 0.36 |
| Hybrids | NKXS01000181.1 | 128597 | 0.36 |
| Hybrids | NKXS01000181.1 | 128603 | 0.36 |
| Hybrids | NKXS01000198.1 | 48302  | 0.36 |
| Hybrids | NKXS01000243.1 | 4643   | 0.36 |
| Hybrids | NKXS01000244.1 | 124886 | 0.36 |
| Hybrids | NKXS01000253.1 | 99171  | 0.36 |
| Hybrids | NKXS01000269.1 | 50099  | 0.36 |
| Hybrids | NKXS01000269.1 | 50171  | 0.36 |
| Hybrids | NKXS01000269.1 | 50877  | 0.36 |
| Hybrids | NKXS01000278.1 | 65107  | 0.36 |
| Hybrids | NKXS01000278.1 | 65172  | 0.36 |
| Hybrids | NKXS01000293.1 | 14012  | 0.36 |
| Hybrids | NKXS01000315.1 | 50728  | 0.36 |
| Hybrids | NKXS01000315.1 | 50866  | 0.36 |
| Hybrids | NKXS01000344.1 | 148929 | 0.36 |
| Hybrids | NKXS01000421.1 | 120743 | 0.36 |
| Hybrids | NKXS01000421.1 | 120801 | 0.36 |
| Hybrids | NKXS01000421.1 | 120838 | 0.36 |
| Hybrids | NKXS01000450.1 | 15366  | 0.36 |

|         |                |        |      |
|---------|----------------|--------|------|
| Hybrids | NKXS01000450.1 | 15382  | 0.36 |
| Hybrids | NKXS01000455.1 | 123684 | 0.36 |
| Hybrids | NKXS01000460.1 | 149111 | 0.36 |
| Hybrids | NKXS01000487.1 | 106929 | 0.36 |
| Hybrids | NKXS01000487.1 | 106963 | 0.36 |
| Hybrids | NKXS01000487.1 | 107190 | 0.36 |
| Hybrids | NKXS01000493.1 | 10147  | 0.36 |
| Hybrids | NKXS01000493.1 | 9992   | 0.36 |
| Hybrids | NKXS01000517.1 | 129977 | 0.36 |
| Hybrids | NKXS01000517.1 | 130137 | 0.36 |
| Hybrids | NKXS01000517.1 | 130213 | 0.36 |
| Hybrids | NKXS01000562.1 | 56569  | 0.36 |
| Hybrids | NKXS01000562.1 | 56637  | 0.36 |
| Hybrids | NKXS01000581.1 | 128732 | 0.36 |
| Hybrids | NKXS01000584.1 | 9332   | 0.36 |
| Hybrids | NKXS01000584.1 | 9391   | 0.36 |
| Hybrids | NKXS01000585.1 | 257174 | 0.36 |
| Hybrids | NKXS01000587.1 | 103045 | 0.36 |
| Hybrids | NKXS01000633.1 | 56289  | 0.36 |
| Hybrids | NKXS01000646.1 | 6359   | 0.36 |
| Hybrids | NKXS01000646.1 | 6421   | 0.36 |
| Hybrids | NKXS01000662.1 | 95940  | 0.36 |
| Hybrids | NKXS01000662.1 | 95955  | 0.36 |
| Hybrids | NKXS01000662.1 | 95960  | 0.36 |
| Hybrids | NKXS01000686.1 | 16917  | 0.36 |
| Hybrids | NKXS01000703.1 | 44127  | 0.36 |
| Hybrids | NKXS01000733.1 | 6744   | 0.36 |
| Hybrids | NKXS01000733.1 | 6772   | 0.36 |
| Hybrids | NKXS01000733.1 | 6819   | 0.36 |
| Hybrids | NKXS01000733.1 | 6966   | 0.36 |
| Hybrids | NKXS01000733.1 | 90919  | 0.36 |
| Hybrids | NKXS01000734.1 | 69370  | 0.36 |
| Hybrids | NKXS01000744.1 | 29896  | 0.36 |
| Hybrids | NKXS01000744.1 | 29959  | 0.36 |
| Hybrids | NKXS01000744.1 | 29987  | 0.36 |
| Hybrids | NKXS01000770.1 | 97912  | 0.36 |
| Hybrids | NKXS01000775.1 | 83027  | 0.36 |
| Hybrids | NKXS01000852.1 | 102595 | 0.36 |
| Hybrids | NKXS01000852.1 | 110362 | 0.36 |
| Hybrids | NKXS01000852.1 | 118899 | 0.36 |
| Hybrids | NKXS01000863.1 | 154031 | 0.36 |
| Hybrids | NKXS01000877.1 | 94049  | 0.36 |
| Hybrids | NKXS01000891.1 | 36265  | 0.36 |
| Hybrids | NKXS01000891.1 | 36281  | 0.36 |

|         |                |        |      |
|---------|----------------|--------|------|
| Hybrids | NKXS01000892.1 | 72872  | 0.36 |
| Hybrids | NKXS01000893.1 | 75862  | 0.36 |
| Hybrids | NKXS01000911.1 | 113705 | 0.36 |
| Hybrids | NKXS01000956.1 | 9498   | 0.36 |
| Hybrids | NKXS01000956.1 | 9513   | 0.36 |
| Hybrids | NKXS01000956.1 | 9595   | 0.36 |
| Hybrids | NKXS01000965.1 | 114007 | 0.36 |
| Hybrids | NKXS01000991.1 | 6144   | 0.36 |
| Hybrids | NKXS01001038.1 | 13124  | 0.36 |
| Hybrids | NKXS01001041.1 | 8663   | 0.36 |
| Hybrids | NKXS01001059.1 | 139883 | 0.36 |
| Hybrids | NKXS01001087.1 | 53577  | 0.36 |
| Hybrids | NKXS01001096.1 | 82646  | 0.36 |
| Hybrids | NKXS01001100.1 | 59873  | 0.36 |
| Hybrids | NKXS01001111.1 | 110294 | 0.36 |
| Hybrids | NKXS01001111.1 | 128559 | 0.36 |
| Hybrids | NKXS01001122.1 | 185995 | 0.36 |
| Hybrids | NKXS01001122.1 | 41761  | 0.36 |
| Hybrids | NKXS01001127.1 | 45727  | 0.36 |
| Hybrids | NKXS01001129.1 | 107903 | 0.36 |
| Hybrids | NKXS01001134.1 | 14500  | 0.36 |
| Hybrids | NKXS01001134.1 | 14614  | 0.36 |
| Hybrids | NKXS01001169.1 | 146953 | 0.36 |
| Hybrids | NKXS01001187.1 | 91193  | 0.36 |
| Hybrids | NKXS01001189.1 | 226065 | 0.36 |
| Hybrids | NKXS01001193.1 | 38798  | 0.36 |
| Hybrids | NKXS01001200.1 | 92253  | 0.36 |
| Hybrids | NKXS01001202.1 | 76238  | 0.36 |
| Hybrids | NKXS01001232.1 | 76069  | 0.36 |
| Hybrids | NKXS01001240.1 | 105006 | 0.36 |
| Hybrids | NKXS01001245.1 | 45084  | 0.36 |
| Hybrids | NKXS01001245.1 | 45245  | 0.36 |
| Hybrids | NKXS01001250.1 | 100733 | 0.36 |
| Hybrids | NKXS01001289.1 | 55254  | 0.36 |
| Hybrids | NKXS01001289.1 | 55358  | 0.36 |
| Hybrids | NKXS01001367.1 | 67793  | 0.36 |
| Hybrids | NKXS01001387.1 | 132563 | 0.36 |
| Hybrids | NKXS01001387.1 | 92955  | 0.36 |
| Hybrids | NKXS01001387.1 | 93126  | 0.36 |
| Hybrids | NKXS01001418.1 | 48413  | 0.36 |
| Hybrids | NKXS01001418.1 | 48469  | 0.36 |
| Hybrids | NKXS01001442.1 | 40157  | 0.36 |
| Hybrids | NKXS01001442.1 | 40168  | 0.36 |
| Hybrids | NKXS01001466.1 | 15907  | 0.36 |

|         |                |        |      |
|---------|----------------|--------|------|
| Hybrids | NKXS01001466.1 | 15942  | 0.36 |
| Hybrids | NKXS01001466.1 | 15945  | 0.36 |
| Hybrids | NKXS01001466.1 | 15982  | 0.36 |
| Hybrids | NKXS01001466.1 | 16029  | 0.36 |
| Hybrids | NKXS01001466.1 | 16036  | 0.36 |
| Hybrids | NKXS01001466.1 | 16062  | 0.36 |
| Hybrids | NKXS01001466.1 | 16063  | 0.36 |
| Hybrids | NKXS01001495.1 | 78918  | 0.36 |
| Hybrids | NKXS01001525.1 | 57085  | 0.36 |
| Hybrids | NKXS01001525.1 | 57108  | 0.36 |
| Hybrids | NKXS01001525.1 | 57178  | 0.36 |
| Hybrids | NKXS01001530.1 | 36861  | 0.36 |
| Hybrids | NKXS01001578.1 | 40582  | 0.36 |
| Hybrids | NKXS01001578.1 | 40589  | 0.36 |
| Hybrids | NKXS01001584.1 | 101195 | 0.36 |
| Hybrids | NKXS01001584.1 | 101272 | 0.36 |
| Hybrids | NKXS01001584.1 | 101302 | 0.36 |
| Hybrids | NKXS01001597.1 | 30658  | 0.36 |
| Hybrids | NKXS01001597.1 | 30771  | 0.36 |
| Hybrids | NKXS01001773.1 | 48152  | 0.36 |
| Hybrids | NKXS01001812.1 | 35278  | 0.36 |
| Hybrids | NKXS01001817.1 | 26236  | 0.36 |
| Hybrids | NKXS01001829.1 | 18991  | 0.36 |
| Hybrids | NKXS01001829.1 | 19012  | 0.36 |
| Hybrids | NKXS01001901.1 | 11777  | 0.36 |
| Hybrids | NKXS01001908.1 | 34945  | 0.36 |
| Hybrids | NKXS01001920.1 | 37670  | 0.36 |
| Hybrids | NKXS01001920.1 | 37683  | 0.36 |
| Hybrids | NKXS01001957.1 | 8303   | 0.36 |
| Hybrids | NKXS01001972.1 | 100302 | 0.36 |
| Hybrids | NKXS01001972.1 | 100347 | 0.36 |
| Hybrids | NKXS01001972.1 | 100357 | 0.36 |
| Hybrids | NKXS01001972.1 | 100470 | 0.36 |
| Hybrids | NKXS01001972.1 | 100476 | 0.36 |
| Hybrids | NKXS01001972.1 | 6886   | 0.36 |
| Hybrids | NKXS01001984.1 | 88054  | 0.36 |
| Hybrids | NKXS01001995.1 | 112555 | 0.36 |
| Hybrids | NKXS01001995.1 | 47455  | 0.36 |
| Hybrids | NKXS01001996.1 | 61229  | 0.36 |
| Hybrids | NKXS01002006.1 | 36037  | 0.36 |
| Hybrids | NKXS01002126.1 | 81187  | 0.36 |
| Hybrids | NKXS01002126.1 | 81204  | 0.36 |
| Hybrids | NKXS01002126.1 | 81249  | 0.36 |
| Hybrids | NKXS01002126.1 | 81252  | 0.36 |



|         |                |        |      |
|---------|----------------|--------|------|
| Hybrids | NKXS01002126.1 | 81267  | 0.36 |
| Hybrids | NKXS01002126.1 | 81300  | 0.36 |
| Hybrids | NKXS01002126.1 | 81313  | 0.36 |
| Hybrids | NKXS01002126.1 | 81325  | 0.36 |
| Hybrids | NKXS01002126.1 | 81421  | 0.36 |
| Hybrids | NKXS01002148.1 | 12266  | 0.36 |
| Hybrids | NKXS01002148.1 | 56932  | 0.36 |
| Hybrids | NKXS01002171.1 | 34004  | 0.36 |
| Hybrids | NKXS01002178.1 | 5198   | 0.36 |
| Hybrids | NKXS01002182.1 | 2010   | 0.36 |
| Hybrids | NKXS01002188.1 | 13999  | 0.36 |
| Hybrids | NKXS01002216.1 | 18316  | 0.36 |
| Hybrids | NKXS01002293.1 | 12586  | 0.36 |
| Hybrids | NKXS01002293.1 | 12626  | 0.36 |
| Hybrids | NKXS01002321.1 | 126589 | 0.36 |
| Hybrids | NKXS01002321.1 | 126758 | 0.36 |
| Hybrids | NKXS01002352.1 | 42818  | 0.36 |
| Hybrids | NKXS01002382.1 | 73784  | 0.36 |
| Hybrids | NKXS01002394.1 | 88057  | 0.36 |
| Hybrids | NKXS01002394.1 | 88136  | 0.36 |
| Hybrids | NKXS01002396.1 | 10289  | 0.36 |
| Hybrids | NKXS01002411.1 | 90610  | 0.36 |
| Hybrids | NKXS01002469.1 | 99660  | 0.36 |
| Hybrids | NKXS01002469.1 | 99696  | 0.36 |
| Hybrids | NKXS01002516.1 | 31761  | 0.36 |
| Hybrids | NKXS01002516.1 | 31866  | 0.36 |
| Hybrids | NKXS01002529.1 | 43380  | 0.36 |
| Hybrids | NKXS01002529.1 | 43476  | 0.36 |
| Hybrids | NKXS01002529.1 | 43616  | 0.36 |
| Hybrids | NKXS01002555.1 | 33107  | 0.36 |
| Hybrids | NKXS01002555.1 | 33186  | 0.36 |
| Hybrids | NKXS01002555.1 | 33225  | 0.36 |
| Hybrids | NKXS01002562.1 | 89659  | 0.36 |
| Hybrids | NKXS01002577.1 | 191    | 0.36 |
| Hybrids | NKXS01002606.1 | 85039  | 0.36 |
| Hybrids | NKXS01002625.1 | 65819  | 0.36 |
| Hybrids | NKXS01002625.1 | 65859  | 0.36 |
| Hybrids | NKXS01002625.1 | 65913  | 0.36 |
| Hybrids | NKXS01002633.1 | 82958  | 0.36 |
| Hybrids | NKXS01002633.1 | 82991  | 0.36 |
| Hybrids | NKXS01002684.1 | 2899   | 0.36 |
| Hybrids | NKXS01002730.1 | 26584  | 0.36 |
| Hybrids | NKXS01002742.1 | 438    | 0.36 |
| Hybrids | NKXS01002742.1 | 444    | 0.36 |

|         |                |        |      |
|---------|----------------|--------|------|
| Hybrids | NKXS01002742.1 | 449    | 0.36 |
| Hybrids | NKXS01002742.1 | 490    | 0.36 |
| Hybrids | NKXS01002742.1 | 543    | 0.36 |
| Hybrids | NKXS01002747.1 | 3013   | 0.36 |
| Hybrids | NKXS01002747.1 | 3247   | 0.36 |
| Hybrids | NKXS01002749.1 | 28520  | 0.36 |
| Hybrids | NKXS01002749.1 | 28602  | 0.36 |
| Hybrids | NKXS01002749.1 | 28613  | 0.36 |
| Hybrids | NKXS01002817.1 | 27548  | 0.36 |
| Hybrids | NKXS01002823.1 | 26490  | 0.36 |
| Hybrids | NKXS01002825.1 | 122282 | 0.36 |
| Hybrids | NKXS01002839.1 | 9188   | 0.36 |
| Hybrids | NKXS01002941.1 | 14416  | 0.36 |
| Hybrids | NKXS01002941.1 | 14431  | 0.36 |
| Hybrids | NKXS01002941.1 | 22034  | 0.36 |
| Hybrids | NKXS01002944.1 | 1211   | 0.36 |
| Hybrids | NKXS01002958.1 | 70168  | 0.36 |
| Hybrids | NKXS01002982.1 | 8085   | 0.36 |
| Hybrids | NKXS01003001.1 | 67505  | 0.36 |
| Hybrids | NKXS01003078.1 | 16381  | 0.36 |
| Hybrids | NKXS01003091.1 | 9476   | 0.36 |
| Hybrids | NKXS01003091.1 | 9556   | 0.36 |
| Hybrids | NKXS01003105.1 | 56404  | 0.36 |
| Hybrids | NKXS01003115.1 | 16460  | 0.36 |
| Hybrids | NKXS01003120.1 | 5032   | 0.36 |
| Hybrids | NKXS01003134.1 | 67020  | 0.36 |
| Hybrids | NKXS01003134.1 | 67129  | 0.36 |
| Hybrids | NKXS01003142.1 | 79435  | 0.36 |
| Hybrids | NKXS01003216.1 | 30515  | 0.36 |
| Hybrids | NKXS01003262.1 | 19918  | 0.36 |
| Hybrids | NKXS01003269.1 | 72599  | 0.36 |
| Hybrids | NKXS01003271.1 | 69732  | 0.36 |
| Hybrids | NKXS01003344.1 | 13115  | 0.36 |
| Hybrids | NKXS01003365.1 | 26581  | 0.36 |
| Hybrids | NKXS01003382.1 | 15105  | 0.36 |
| Hybrids | NKXS01003413.1 | 990    | 0.36 |
| Hybrids | NKXS01003418.1 | 65293  | 0.36 |
| Hybrids | NKXS01003418.1 | 65486  | 0.36 |
| Hybrids | NKXS01003459.1 | 41071  | 0.36 |
| Hybrids | NKXS01003503.1 | 4259   | 0.36 |
| Hybrids | NKXS01003545.1 | 33639  | 0.36 |
| Hybrids | NKXS01003576.1 | 35435  | 0.36 |
| Hybrids | NKXS01003580.1 | 63974  | 0.36 |
| Hybrids | NKXS01003581.1 | 90104  | 0.36 |

|         |                |        |      |
|---------|----------------|--------|------|
| Hybrids | NKXS01003612.1 | 26805  | 0.36 |
| Hybrids | NKXS01003646.1 | 74515  | 0.36 |
| Hybrids | NKXS01003686.1 | 10021  | 0.36 |
| Hybrids | NKXS01003686.1 | 10081  | 0.36 |
| Hybrids | NKXS01003686.1 | 10270  | 0.36 |
| Hybrids | NKXS01003712.1 | 33657  | 0.36 |
| Hybrids | NKXS01003713.1 | 39527  | 0.36 |
| Hybrids | NKXS01003713.1 | 39753  | 0.36 |
| Hybrids | NKXS01003766.1 | 19606  | 0.36 |
| Hybrids | NKXS01003766.1 | 19701  | 0.36 |
| Hybrids | NKXS01003829.1 | 32940  | 0.36 |
| Hybrids | NKXS01003829.1 | 33081  | 0.36 |
| Hybrids | NKXS01003861.1 | 69192  | 0.36 |
| Hybrids | NKXS01003861.1 | 69198  | 0.36 |
| Hybrids | NKXS01003868.1 | 106879 | 0.36 |
| Hybrids | NKXS01003876.1 | 40465  | 0.36 |
| Hybrids | NKXS01003918.1 | 136746 | 0.36 |
| Hybrids | NKXS01003956.1 | 23739  | 0.36 |
| Hybrids | NKXS01003959.1 | 90605  | 0.36 |
| Hybrids | NKXS01003972.1 | 15404  | 0.36 |
| Hybrids | NKXS01003981.1 | 26549  | 0.36 |
| Hybrids | NKXS01004033.1 | 68806  | 0.36 |
| Hybrids | NKXS01004037.1 | 70048  | 0.36 |
| Hybrids | NKXS01004050.1 | 13908  | 0.36 |
| Hybrids | NKXS01004098.1 | 32443  | 0.36 |
| Hybrids | NKXS01004098.1 | 32531  | 0.36 |
| Hybrids | NKXS01004122.1 | 59278  | 0.36 |
| Hybrids | NKXS01004122.1 | 59401  | 0.36 |
| Hybrids | NKXS01004122.1 | 59437  | 0.36 |
| Hybrids | NKXS01004139.1 | 44297  | 0.36 |
| Hybrids | NKXS01004180.1 | 33361  | 0.36 |
| Hybrids | NKXS01004240.1 | 12476  | 0.36 |
| Hybrids | NKXS01004240.1 | 12540  | 0.36 |
| Hybrids | NKXS01004240.1 | 12591  | 0.36 |
| Hybrids | NKXS01004247.1 | 38754  | 0.36 |
| Hybrids | NKXS01004247.1 | 38770  | 0.36 |
| Hybrids | NKXS01004247.1 | 38825  | 0.36 |
| Hybrids | NKXS01004283.1 | 60692  | 0.36 |
| Hybrids | NKXS01004283.1 | 63106  | 0.36 |
| Hybrids | NKXS01004283.1 | 63160  | 0.36 |
| Hybrids | NKXS01004283.1 | 63206  | 0.36 |
| Hybrids | NKXS01004300.1 | 50091  | 0.36 |
| Hybrids | NKXS01004311.1 | 26462  | 0.36 |
| Hybrids | NKXS01004338.1 | 17997  | 0.36 |

|         |                |       |      |
|---------|----------------|-------|------|
| Hybrids | NKXS01004342.1 | 36716 | 0.36 |
| Hybrids | NKXS01004342.1 | 36790 | 0.36 |
| Hybrids | NKXS01004369.1 | 11367 | 0.36 |
| Hybrids | NKXS01004420.1 | 24369 | 0.36 |
| Hybrids | NKXS01004421.1 | 46404 | 0.36 |
| Hybrids | NKXS01004444.1 | 15924 | 0.36 |
| Hybrids | NKXS01004449.1 | 41595 | 0.36 |
| Hybrids | NKXS01004471.1 | 1655  | 0.36 |
| Hybrids | NKXS01004485.1 | 30071 | 0.36 |
| Hybrids | NKXS01004485.1 | 30220 | 0.36 |
| Hybrids | NKXS01004536.1 | 39315 | 0.36 |
| Hybrids | NKXS01004567.1 | 24511 | 0.36 |
| Hybrids | NKXS01004570.1 | 17212 | 0.36 |
| Hybrids | NKXS01004570.1 | 17213 | 0.36 |
| Hybrids | NKXS01004570.1 | 17294 | 0.36 |
| Hybrids | NKXS01004579.1 | 41236 | 0.36 |
| Hybrids | NKXS01004643.1 | 17317 | 0.36 |
| Hybrids | NKXS01004803.1 | 22922 | 0.36 |
| Hybrids | NKXS01004803.1 | 22991 | 0.36 |
| Hybrids | NKXS01004803.1 | 23002 | 0.36 |
| Hybrids | NKXS01004803.1 | 23038 | 0.36 |
| Hybrids | NKXS01004804.1 | 16984 | 0.36 |
| Hybrids | NKXS01004804.1 | 17117 | 0.36 |
| Hybrids | NKXS01004812.1 | 29611 | 0.36 |
| Hybrids | NKXS01004852.1 | 886   | 0.36 |
| Hybrids | NKXS01004914.1 | 53291 | 0.36 |
| Hybrids | NKXS01004944.1 | 44813 | 0.36 |
| Hybrids | NKXS01004944.1 | 44814 | 0.36 |
| Hybrids | NKXS01004944.1 | 44862 | 0.36 |
| Hybrids | NKXS01004944.1 | 44865 | 0.36 |
| Hybrids | NKXS01004944.1 | 44870 | 0.36 |
| Hybrids | NKXS01004944.1 | 44882 | 0.36 |
| Hybrids | NKXS01004944.1 | 44949 | 0.36 |
| Hybrids | NKXS01004944.1 | 44994 | 0.36 |
| Hybrids | NKXS01004951.1 | 20749 | 0.36 |
| Hybrids | NKXS01004951.1 | 20770 | 0.36 |
| Hybrids | NKXS01004951.1 | 20821 | 0.36 |
| Hybrids | NKXS01005047.1 | 13553 | 0.36 |
| Hybrids | NKXS01005055.1 | 5660  | 0.36 |
| Hybrids | NKXS01005069.1 | 17665 | 0.36 |
| Hybrids | NKXS01005069.1 | 17672 | 0.36 |
| Hybrids | NKXS01005070.1 | 27454 | 0.36 |
| Hybrids | NKXS01005135.1 | 12466 | 0.36 |
| Hybrids | NKXS01005135.1 | 12501 | 0.36 |

|         |                |       |      |
|---------|----------------|-------|------|
| Hybrids | NKXS01005245.1 | 10022 | 0.36 |
| Hybrids | NKXS01005267.1 | 1248  | 0.36 |
| Hybrids | NKXS01005329.1 | 53463 | 0.36 |
| Hybrids | NKXS01005368.1 | 1197  | 0.36 |
| Hybrids | NKXS01005417.1 | 48429 | 0.36 |
| Hybrids | NKXS01005439.1 | 10190 | 0.36 |
| Hybrids | NKXS01005457.1 | 40567 | 0.36 |
| Hybrids | NKXS01005457.1 | 40589 | 0.36 |
| Hybrids | NKXS01005457.1 | 40630 | 0.36 |
| Hybrids | NKXS01005457.1 | 40636 | 0.36 |
| Hybrids | NKXS01005457.1 | 40698 | 0.36 |
| Hybrids | NKXS01005553.1 | 4095  | 0.36 |
| Hybrids | NKXS01005612.1 | 19767 | 0.36 |
| Hybrids | NKXS01005629.1 | 44533 | 0.36 |
| Hybrids | NKXS01005629.1 | 44540 | 0.36 |
| Hybrids | NKXS01005629.1 | 44614 | 0.36 |
| Hybrids | NKXS01005629.1 | 44651 | 0.36 |
| Hybrids | NKXS01005631.1 | 58810 | 0.36 |
| Hybrids | NKXS01005643.1 | 21663 | 0.36 |
| Hybrids | NKXS01005654.1 | 29047 | 0.36 |
| Hybrids | NKXS01005698.1 | 37864 | 0.36 |
| Hybrids | NKXS01005698.1 | 37954 | 0.36 |
| Hybrids | NKXS01005869.1 | 26398 | 0.36 |
| Hybrids | NKXS01005878.1 | 32706 | 0.36 |
| Hybrids | NKXS01005878.1 | 32770 | 0.36 |
| Hybrids | NKXS01005878.1 | 32893 | 0.36 |
| Hybrids | NKXS01005981.1 | 15419 | 0.36 |
| Hybrids | NKXS01005981.1 | 15436 | 0.36 |
| Hybrids | NKXS01005981.1 | 15458 | 0.36 |
| Hybrids | NKXS01005981.1 | 15493 | 0.36 |
| Hybrids | NKXS01005981.1 | 15517 | 0.36 |
| Hybrids | NKXS01006017.1 | 6122  | 0.36 |
| Hybrids | NKXS01006017.1 | 6182  | 0.36 |
| Hybrids | NKXS01006094.1 | 18156 | 0.36 |
| Hybrids | NKXS01006095.1 | 48673 | 0.36 |
| Hybrids | NKXS01006113.1 | 2628  | 0.36 |
| Hybrids | NKXS01006206.1 | 1763  | 0.36 |
| Hybrids | NKXS01006206.1 | 1786  | 0.36 |
| Hybrids | NKXS01006276.1 | 21125 | 0.36 |
| Hybrids | NKXS01006286.1 | 28234 | 0.36 |
| Hybrids | NKXS01006304.1 | 40767 | 0.36 |
| Hybrids | NKXS01006314.1 | 62851 | 0.36 |
| Hybrids | NKXS01006346.1 | 7154  | 0.36 |
| Hybrids | NKXS01006360.1 | 5819  | 0.36 |

|         |                |       |      |
|---------|----------------|-------|------|
| Hybrids | NKXS01006360.1 | 5827  | 0.36 |
| Hybrids | NKXS01006360.1 | 6016  | 0.36 |
| Hybrids | NKXS01006381.1 | 24054 | 0.36 |
| Hybrids | NKXS01006381.1 | 24076 | 0.36 |
| Hybrids | NKXS01006381.1 | 24139 | 0.36 |
| Hybrids | NKXS01006381.1 | 24258 | 0.36 |
| Hybrids | NKXS01006391.1 | 142   | 0.36 |
| Hybrids | NKXS01006438.1 | 29510 | 0.36 |
| Hybrids | NKXS01006479.1 | 34308 | 0.36 |
| Hybrids | NKXS01006490.1 | 30365 | 0.36 |
| Hybrids | NKXS01006502.1 | 20704 | 0.36 |
| Hybrids | NKXS01006590.1 | 32279 | 0.36 |
| Hybrids | NKXS01006590.1 | 32284 | 0.36 |
| Hybrids | NKXS01006590.1 | 32290 | 0.36 |
| Hybrids | NKXS01006590.1 | 32343 | 0.36 |
| Hybrids | NKXS01006590.1 | 32371 | 0.36 |
| Hybrids | NKXS01006624.1 | 19050 | 0.36 |
| Hybrids | NKXS01006714.1 | 10427 | 0.36 |
| Hybrids | NKXS01006731.1 | 43834 | 0.36 |
| Hybrids | NKXS01006739.1 | 20613 | 0.36 |
| Hybrids | NKXS01006739.1 | 28155 | 0.36 |
| Hybrids | NKXS01006739.1 | 28181 | 0.36 |
| Hybrids | NKXS01006800.1 | 19534 | 0.36 |
| Hybrids | NKXS01006806.1 | 16302 | 0.36 |
| Hybrids | NKXS01006806.1 | 16461 | 0.36 |
| Hybrids | NKXS01006883.1 | 23833 | 0.36 |
| Hybrids | NKXS01006994.1 | 10018 | 0.36 |
| Hybrids | NKXS01006994.1 | 10036 | 0.36 |
| Hybrids | NKXS01006994.1 | 9862  | 0.36 |
| Hybrids | NKXS01006994.1 | 9886  | 0.36 |
| Hybrids | NKXS01006994.1 | 9948  | 0.36 |
| Hybrids | NKXS01006998.1 | 24516 | 0.36 |
| Hybrids | NKXS01006998.1 | 24566 | 0.36 |
| Hybrids | NKXS01007175.1 | 24894 | 0.36 |
| Hybrids | NKXS01007189.1 | 18654 | 0.36 |
| Hybrids | NKXS01007308.1 | 18263 | 0.36 |
| Hybrids | NKXS01007395.1 | 16397 | 0.36 |
| Hybrids | NKXS01007414.1 | 3509  | 0.36 |
| Hybrids | NKXS01007454.1 | 10745 | 0.36 |
| Hybrids | NKXS01007454.1 | 10757 | 0.36 |
| Hybrids | NKXS01007454.1 | 10791 | 0.36 |
| Hybrids | NKXS01007454.1 | 10795 | 0.36 |
| Hybrids | NKXS01007454.1 | 10898 | 0.36 |
| Hybrids | NKXS01007455.1 | 15393 | 0.36 |

|         |                |       |      |
|---------|----------------|-------|------|
| Hybrids | NKXS01007467.1 | 14007 | 0.36 |
| Hybrids | NKXS01007467.1 | 14141 | 0.36 |
| Hybrids | NKXS01007519.1 | 11014 | 0.36 |
| Hybrids | NKXS01007519.1 | 11037 | 0.36 |
| Hybrids | NKXS01007531.1 | 5662  | 0.36 |
| Hybrids | NKXS01007603.1 | 20822 | 0.36 |
| Hybrids | NKXS01007742.1 | 3839  | 0.36 |
| Hybrids | NKXS01007816.1 | 2230  | 0.36 |
| Hybrids | NKXS01007894.1 | 4226  | 0.36 |
| Hybrids | NKXS01008034.1 | 13593 | 0.36 |
| Hybrids | NKXS01008034.1 | 13653 | 0.36 |
| Hybrids | NKXS01008034.1 | 13665 | 0.36 |
| Hybrids | NKXS01008034.1 | 13719 | 0.36 |
| Hybrids | NKXS01008034.1 | 13746 | 0.36 |
| Hybrids | NKXS01008169.1 | 31370 | 0.36 |
| Hybrids | NKXS01008188.1 | 14659 | 0.36 |
| Hybrids | NKXS01008188.1 | 14676 | 0.36 |
| Hybrids | NKXS01008197.1 | 14008 | 0.36 |
| Hybrids | NKXS01008197.1 | 14053 | 0.36 |
| Hybrids | NKXS01008197.1 | 14061 | 0.36 |
| Hybrids | NKXS01008197.1 | 14073 | 0.36 |
| Hybrids | NKXS01008197.1 | 14159 | 0.36 |
| Hybrids | NKXS01008197.1 | 14172 | 0.36 |
| Hybrids | NKXS01008275.1 | 4742  | 0.36 |
| Hybrids | NKXS01008444.1 | 3553  | 0.36 |
| Hybrids | NKXS01008500.1 | 865   | 0.36 |
| Hybrids | NKXS01008501.1 | 15732 | 0.36 |
| Hybrids | NKXS01008579.1 | 9767  | 0.36 |
| Hybrids | NKXS01008604.1 | 2579  | 0.36 |
| Hybrids | NKXS01008628.1 | 14557 | 0.36 |
| Hybrids | NKXS01008820.1 | 6624  | 0.36 |
| Hybrids | NKXS01008835.1 | 8632  | 0.36 |
| Hybrids | NKXS01008881.1 | 11200 | 0.36 |
| Hybrids | NKXS01008898.1 | 4335  | 0.36 |
| Hybrids | NKXS01008955.1 | 13811 | 0.36 |
| Hybrids | NKXS01009115.1 | 6699  | 0.36 |
| Hybrids | NKXS01009115.1 | 6709  | 0.36 |
| Hybrids | NKXS01009215.1 | 11863 | 0.36 |
| Hybrids | NKXS01009271.1 | 2747  | 0.36 |
| Hybrids | NKXS01009493.1 | 5072  | 0.36 |
| Hybrids | NKXS01010170.1 | 1408  | 0.36 |
| Hybrids | NKXS01012069.1 | 844   | 0.36 |
| Hybrids | NKXS01012469.1 | 937   | 0.36 |
| Hybrids | NKXS01000003.1 | 6059  | 0.27 |

|         |                |        |      |
|---------|----------------|--------|------|
| Hybrids | NKXS01000006.1 | 31263  | 0.27 |
| Hybrids | NKXS01000017.1 | 167505 | 0.27 |
| Hybrids | NKXS01000017.1 | 89817  | 0.27 |
| Hybrids | NKXS01000017.1 | 89876  | 0.27 |
| Hybrids | NKXS01000017.1 | 89901  | 0.27 |
| Hybrids | NKXS01000050.1 | 217602 | 0.27 |
| Hybrids | NKXS01000051.1 | 32087  | 0.27 |
| Hybrids | NKXS01000051.1 | 32303  | 0.27 |
| Hybrids | NKXS01000065.1 | 69837  | 0.27 |
| Hybrids | NKXS01000070.1 | 7033   | 0.27 |
| Hybrids | NKXS01000087.1 | 14621  | 0.27 |
| Hybrids | NKXS01000090.1 | 83563  | 0.27 |
| Hybrids | NKXS01000094.1 | 184706 | 0.27 |
| Hybrids | NKXS01000094.1 | 184749 | 0.27 |
| Hybrids | NKXS01000096.1 | 245534 | 0.27 |
| Hybrids | NKXS01000097.1 | 29611  | 0.27 |
| Hybrids | NKXS01000119.1 | 8618   | 0.27 |
| Hybrids | NKXS01000132.1 | 140380 | 0.27 |
| Hybrids | NKXS01000144.1 | 9623   | 0.27 |
| Hybrids | NKXS01000144.1 | 9633   | 0.27 |
| Hybrids | NKXS01000144.1 | 9726   | 0.27 |
| Hybrids | NKXS01000144.1 | 9825   | 0.27 |
| Hybrids | NKXS01000167.1 | 198720 | 0.27 |
| Hybrids | NKXS01000167.1 | 198855 | 0.27 |
| Hybrids | NKXS01000167.1 | 198873 | 0.27 |
| Hybrids | NKXS01000175.1 | 58115  | 0.27 |
| Hybrids | NKXS01000217.1 | 10875  | 0.27 |
| Hybrids | NKXS01000244.1 | 124935 | 0.27 |
| Hybrids | NKXS01000269.1 | 50642  | 0.27 |
| Hybrids | NKXS01000278.1 | 65018  | 0.27 |
| Hybrids | NKXS01000278.1 | 65136  | 0.27 |
| Hybrids | NKXS01000278.1 | 65151  | 0.27 |
| Hybrids | NKXS01000279.1 | 88264  | 0.27 |
| Hybrids | NKXS01000298.1 | 171662 | 0.27 |
| Hybrids | NKXS01000304.1 | 48309  | 0.27 |
| Hybrids | NKXS01000321.1 | 147306 | 0.27 |
| Hybrids | NKXS01000344.1 | 148943 | 0.27 |
| Hybrids | NKXS01000344.1 | 149130 | 0.27 |
| Hybrids | NKXS01000347.1 | 5062   | 0.27 |
| Hybrids | NKXS01000353.1 | 159137 | 0.27 |
| Hybrids | NKXS01000359.1 | 183576 | 0.27 |
| Hybrids | NKXS01000359.1 | 183611 | 0.27 |
| Hybrids | NKXS01000359.1 | 183654 | 0.27 |
| Hybrids | NKXS01000359.1 | 183659 | 0.27 |



|         |                |        |      |
|---------|----------------|--------|------|
| Hybrids | NKXS01000359.1 | 183685 | 0.27 |
| Hybrids | NKXS01000359.1 | 183700 | 0.27 |
| Hybrids | NKXS01000359.1 | 183709 | 0.27 |
| Hybrids | NKXS01000387.1 | 179978 | 0.27 |
| Hybrids | NKXS01000421.1 | 120737 | 0.27 |
| Hybrids | NKXS01000421.1 | 120769 | 0.27 |
| Hybrids | NKXS01000421.1 | 120774 | 0.27 |
| Hybrids | NKXS01000421.1 | 120899 | 0.27 |
| Hybrids | NKXS01000421.1 | 120959 | 0.27 |
| Hybrids | NKXS01000421.1 | 120971 | 0.27 |
| Hybrids | NKXS01000421.1 | 121003 | 0.27 |
| Hybrids | NKXS01000421.1 | 178882 | 0.27 |
| Hybrids | NKXS01000437.1 | 5905   | 0.27 |
| Hybrids | NKXS01000437.1 | 5917   | 0.27 |
| Hybrids | NKXS01000479.1 | 75156  | 0.27 |
| Hybrids | NKXS01000487.1 | 107193 | 0.27 |
| Hybrids | NKXS01000503.1 | 68306  | 0.27 |
| Hybrids | NKXS01000559.1 | 23895  | 0.27 |
| Hybrids | NKXS01000562.1 | 56672  | 0.27 |
| Hybrids | NKXS01000562.1 | 56688  | 0.27 |
| Hybrids | NKXS01000562.1 | 56703  | 0.27 |
| Hybrids | NKXS01000562.1 | 56720  | 0.27 |
| Hybrids | NKXS01000562.1 | 56800  | 0.27 |
| Hybrids | NKXS01000585.1 | 247823 | 0.27 |
| Hybrids | NKXS01000593.1 | 16297  | 0.27 |
| Hybrids | NKXS01000593.1 | 16389  | 0.27 |
| Hybrids | NKXS01000602.1 | 149999 | 0.27 |
| Hybrids | NKXS01000603.1 | 79108  | 0.27 |
| Hybrids | NKXS01000603.1 | 79156  | 0.27 |
| Hybrids | NKXS01000644.1 | 144641 | 0.27 |
| Hybrids | NKXS01000644.1 | 144676 | 0.27 |
| Hybrids | NKXS01000662.1 | 95831  | 0.27 |
| Hybrids | NKXS01000662.1 | 95848  | 0.27 |
| Hybrids | NKXS01000688.1 | 51618  | 0.27 |
| Hybrids | NKXS01000704.1 | 47310  | 0.27 |
| Hybrids | NKXS01000718.1 | 77965  | 0.27 |
| Hybrids | NKXS01000733.1 | 6860   | 0.27 |
| Hybrids | NKXS01000734.1 | 69272  | 0.27 |
| Hybrids | NKXS01000775.1 | 111664 | 0.27 |
| Hybrids | NKXS01000775.1 | 111755 | 0.27 |
| Hybrids | NKXS01000796.1 | 54915  | 0.27 |
| Hybrids | NKXS01000845.1 | 78971  | 0.27 |
| Hybrids | NKXS01000852.1 | 102599 | 0.27 |
| Hybrids | NKXS01000852.1 | 109769 | 0.27 |

|         |                |        |      |
|---------|----------------|--------|------|
| Hybrids | NKXS01000852.1 | 109833 | 0.27 |
| Hybrids | NKXS01000858.1 | 21782  | 0.27 |
| Hybrids | NKXS01000867.1 | 96746  | 0.27 |
| Hybrids | NKXS01000867.1 | 96770  | 0.27 |
| Hybrids | NKXS01000891.1 | 36181  | 0.27 |
| Hybrids | NKXS01000891.1 | 36287  | 0.27 |
| Hybrids | NKXS01000892.1 | 25390  | 0.27 |
| Hybrids | NKXS01000893.1 | 75829  | 0.27 |
| Hybrids | NKXS01000904.1 | 20306  | 0.27 |
| Hybrids | NKXS01000906.1 | 53392  | 0.27 |
| Hybrids | NKXS01000931.1 | 113338 | 0.27 |
| Hybrids | NKXS01000931.1 | 113569 | 0.27 |
| Hybrids | NKXS01000937.1 | 156484 | 0.27 |
| Hybrids | NKXS01000991.1 | 6045   | 0.27 |
| Hybrids | NKXS01001002.1 | 98943  | 0.27 |
| Hybrids | NKXS01001062.1 | 181600 | 0.27 |
| Hybrids | NKXS01001078.1 | 10977  | 0.27 |
| Hybrids | NKXS01001127.1 | 42810  | 0.27 |
| Hybrids | NKXS01001127.1 | 45771  | 0.27 |
| Hybrids | NKXS01001134.1 | 9682   | 0.27 |
| Hybrids | NKXS01001134.1 | 9704   | 0.27 |
| Hybrids | NKXS01001187.1 | 91374  | 0.27 |
| Hybrids | NKXS01001187.1 | 91381  | 0.27 |
| Hybrids | NKXS01001193.1 | 38808  | 0.27 |
| Hybrids | NKXS01001193.1 | 38955  | 0.27 |
| Hybrids | NKXS01001193.1 | 38962  | 0.27 |
| Hybrids | NKXS01001193.1 | 39002  | 0.27 |
| Hybrids | NKXS01001211.1 | 24828  | 0.27 |
| Hybrids | NKXS01001249.1 | 32390  | 0.27 |
| Hybrids | NKXS01001325.1 | 168777 | 0.27 |
| Hybrids | NKXS01001325.1 | 168864 | 0.27 |
| Hybrids | NKXS01001325.1 | 168882 | 0.27 |
| Hybrids | NKXS01001325.1 | 168894 | 0.27 |
| Hybrids | NKXS01001328.1 | 60624  | 0.27 |
| Hybrids | NKXS01001387.1 | 16396  | 0.27 |
| Hybrids | NKXS01001400.1 | 20266  | 0.27 |
| Hybrids | NKXS01001418.1 | 48373  | 0.27 |
| Hybrids | NKXS01001442.1 | 40061  | 0.27 |
| Hybrids | NKXS01001442.1 | 40064  | 0.27 |
| Hybrids | NKXS01001442.1 | 40066  | 0.27 |
| Hybrids | NKXS01001442.1 | 40144  | 0.27 |
| Hybrids | NKXS01001442.1 | 40152  | 0.27 |
| Hybrids | NKXS01001442.1 | 40198  | 0.27 |
| Hybrids | NKXS01001448.1 | 84031  | 0.27 |

|         |                |        |      |
|---------|----------------|--------|------|
| Hybrids | NKXS01001466.1 | 147669 | 0.27 |
| Hybrids | NKXS01001466.1 | 147755 | 0.27 |
| Hybrids | NKXS01001466.1 | 147830 | 0.27 |
| Hybrids | NKXS01001466.1 | 147848 | 0.27 |
| Hybrids | NKXS01001466.1 | 147884 | 0.27 |
| Hybrids | NKXS01001469.1 | 93576  | 0.27 |
| Hybrids | NKXS01001502.1 | 102511 | 0.27 |
| Hybrids | NKXS01001502.1 | 102526 | 0.27 |
| Hybrids | NKXS01001515.1 | 15802  | 0.27 |
| Hybrids | NKXS01001528.1 | 22097  | 0.27 |
| Hybrids | NKXS01001534.1 | 11164  | 0.27 |
| Hybrids | NKXS01001534.1 | 11239  | 0.27 |
| Hybrids | NKXS01001534.1 | 11253  | 0.27 |
| Hybrids | NKXS01001573.1 | 3700   | 0.27 |
| Hybrids | NKXS01001573.1 | 3762   | 0.27 |
| Hybrids | NKXS01001573.1 | 3773   | 0.27 |
| Hybrids | NKXS01001578.1 | 40703  | 0.27 |
| Hybrids | NKXS01001611.1 | 85380  | 0.27 |
| Hybrids | NKXS01001617.1 | 41959  | 0.27 |
| Hybrids | NKXS01001639.1 | 5305   | 0.27 |
| Hybrids | NKXS01001663.1 | 29428  | 0.27 |
| Hybrids | NKXS01001687.1 | 71188  | 0.27 |
| Hybrids | NKXS01001687.1 | 71221  | 0.27 |
| Hybrids | NKXS01001691.1 | 67268  | 0.27 |
| Hybrids | NKXS01001691.1 | 67388  | 0.27 |
| Hybrids | NKXS01001696.1 | 95301  | 0.27 |
| Hybrids | NKXS01001696.1 | 95312  | 0.27 |
| Hybrids | NKXS01001697.1 | 95372  | 0.27 |
| Hybrids | NKXS01001778.1 | 42885  | 0.27 |
| Hybrids | NKXS01001790.1 | 154399 | 0.27 |
| Hybrids | NKXS01001857.1 | 31136  | 0.27 |
| Hybrids | NKXS01001873.1 | 642    | 0.27 |
| Hybrids | NKXS01001938.1 | 20209  | 0.27 |
| Hybrids | NKXS01001938.1 | 20333  | 0.27 |
| Hybrids | NKXS01001938.1 | 20362  | 0.27 |
| Hybrids | NKXS01001938.1 | 20367  | 0.27 |
| Hybrids | NKXS01001972.1 | 100486 | 0.27 |
| Hybrids | NKXS01001985.1 | 79424  | 0.27 |
| Hybrids | NKXS01001991.1 | 34838  | 0.27 |
| Hybrids | NKXS01001991.1 | 34915  | 0.27 |
| Hybrids | NKXS01001991.1 | 35061  | 0.27 |
| Hybrids | NKXS01001991.1 | 5329   | 0.27 |
| Hybrids | NKXS01001995.1 | 112454 | 0.27 |
| Hybrids | NKXS01001995.1 | 112531 | 0.27 |

|         |                |        |      |
|---------|----------------|--------|------|
| Hybrids | NKXS01001995.1 | 47343  | 0.27 |
| Hybrids | NKXS01001995.1 | 47389  | 0.27 |
| Hybrids | NKXS01001995.1 | 47452  | 0.27 |
| Hybrids | NKXS01001996.1 | 61172  | 0.27 |
| Hybrids | NKXS01001996.1 | 61196  | 0.27 |
| Hybrids | NKXS01002016.1 | 115593 | 0.27 |
| Hybrids | NKXS01002090.1 | 65439  | 0.27 |
| Hybrids | NKXS01002090.1 | 65526  | 0.27 |
| Hybrids | NKXS01002090.1 | 65565  | 0.27 |
| Hybrids | NKXS01002126.1 | 81318  | 0.27 |
| Hybrids | NKXS01002133.1 | 33224  | 0.27 |
| Hybrids | NKXS01002133.1 | 33254  | 0.27 |
| Hybrids | NKXS01002133.1 | 33316  | 0.27 |
| Hybrids | NKXS01002161.1 | 30615  | 0.27 |
| Hybrids | NKXS01002178.1 | 5224   | 0.27 |
| Hybrids | NKXS01002192.1 | 80661  | 0.27 |
| Hybrids | NKXS01002268.1 | 83192  | 0.27 |
| Hybrids | NKXS01002268.1 | 83237  | 0.27 |
| Hybrids | NKXS01002276.1 | 90347  | 0.27 |
| Hybrids | NKXS01002301.1 | 30908  | 0.27 |
| Hybrids | NKXS01002312.1 | 25484  | 0.27 |
| Hybrids | NKXS01002337.1 | 77993  | 0.27 |
| Hybrids | NKXS01002343.1 | 2373   | 0.27 |
| Hybrids | NKXS01002364.1 | 5553   | 0.27 |
| Hybrids | NKXS01002382.1 | 65131  | 0.27 |
| Hybrids | NKXS01002396.1 | 10308  | 0.27 |
| Hybrids | NKXS01002396.1 | 10462  | 0.27 |
| Hybrids | NKXS01002417.1 | 97672  | 0.27 |
| Hybrids | NKXS01002427.1 | 33794  | 0.27 |
| Hybrids | NKXS01002466.1 | 46563  | 0.27 |
| Hybrids | NKXS01002469.1 | 99697  | 0.27 |
| Hybrids | NKXS01002470.1 | 34953  | 0.27 |
| Hybrids | NKXS01002562.1 | 89697  | 0.27 |
| Hybrids | NKXS01002577.1 | 342    | 0.27 |
| Hybrids | NKXS01002577.1 | 355    | 0.27 |
| Hybrids | NKXS01002577.1 | 394    | 0.27 |
| Hybrids | NKXS01002606.1 | 44355  | 0.27 |
| Hybrids | NKXS01002606.1 | 44475  | 0.27 |
| Hybrids | NKXS01002625.1 | 65783  | 0.27 |
| Hybrids | NKXS01002625.1 | 65842  | 0.27 |
| Hybrids | NKXS01002625.1 | 65863  | 0.27 |
| Hybrids | NKXS01002625.1 | 65864  | 0.27 |
| Hybrids | NKXS01002625.1 | 65865  | 0.27 |
| Hybrids | NKXS01002625.1 | 65873  | 0.27 |

|         |                |        |      |
|---------|----------------|--------|------|
| Hybrids | NKXS01002625.1 | 65885  | 0.27 |
| Hybrids | NKXS01002651.1 | 24328  | 0.27 |
| Hybrids | NKXS01002653.1 | 12680  | 0.27 |
| Hybrids | NKXS01002653.1 | 12750  | 0.27 |
| Hybrids | NKXS01002679.1 | 36524  | 0.27 |
| Hybrids | NKXS01002684.1 | 2878   | 0.27 |
| Hybrids | NKXS01002704.1 | 61780  | 0.27 |
| Hybrids | NKXS01002704.1 | 61864  | 0.27 |
| Hybrids | NKXS01002704.1 | 61894  | 0.27 |
| Hybrids | NKXS01002730.1 | 26379  | 0.27 |
| Hybrids | NKXS01002730.1 | 26552  | 0.27 |
| Hybrids | NKXS01002730.1 | 26592  | 0.27 |
| Hybrids | NKXS01002744.1 | 48788  | 0.27 |
| Hybrids | NKXS01002745.1 | 33405  | 0.27 |
| Hybrids | NKXS01002747.1 | 3075   | 0.27 |
| Hybrids | NKXS01002758.1 | 12790  | 0.27 |
| Hybrids | NKXS01002817.1 | 27620  | 0.27 |
| Hybrids | NKXS01002825.1 | 101514 | 0.27 |
| Hybrids | NKXS01002825.1 | 101632 | 0.27 |
| Hybrids | NKXS01002825.1 | 19408  | 0.27 |
| Hybrids | NKXS01002825.1 | 19412  | 0.27 |
| Hybrids | NKXS01002825.1 | 19532  | 0.27 |
| Hybrids | NKXS01002826.1 | 29026  | 0.27 |
| Hybrids | NKXS01002838.1 | 56976  | 0.27 |
| Hybrids | NKXS01002870.1 | 13173  | 0.27 |
| Hybrids | NKXS01002870.1 | 13306  | 0.27 |
| Hybrids | NKXS01002958.1 | 70254  | 0.27 |
| Hybrids | NKXS01003010.1 | 9400   | 0.27 |
| Hybrids | NKXS01003013.1 | 48995  | 0.27 |
| Hybrids | NKXS01003013.1 | 49048  | 0.27 |
| Hybrids | NKXS01003058.1 | 115281 | 0.27 |
| Hybrids | NKXS01003111.1 | 2561   | 0.27 |
| Hybrids | NKXS01003120.1 | 5059   | 0.27 |
| Hybrids | NKXS01003134.1 | 67066  | 0.27 |
| Hybrids | NKXS01003134.1 | 67121  | 0.27 |
| Hybrids | NKXS01003242.1 | 22575  | 0.27 |
| Hybrids | NKXS01003242.1 | 22605  | 0.27 |
| Hybrids | NKXS01003242.1 | 22671  | 0.27 |
| Hybrids | NKXS01003242.1 | 22710  | 0.27 |
| Hybrids | NKXS01003260.1 | 11393  | 0.27 |
| Hybrids | NKXS01003262.1 | 20098  | 0.27 |
| Hybrids | NKXS01003262.1 | 20125  | 0.27 |
| Hybrids | NKXS01003268.1 | 2285   | 0.27 |
| Hybrids | NKXS01003271.1 | 69687  | 0.27 |

|         |                |        |      |
|---------|----------------|--------|------|
| Hybrids | NKXS01003275.1 | 40438  | 0.27 |
| Hybrids | NKXS01003278.1 | 62035  | 0.27 |
| Hybrids | NKXS01003280.1 | 62220  | 0.27 |
| Hybrids | NKXS01003324.1 | 25719  | 0.27 |
| Hybrids | NKXS01003324.1 | 25770  | 0.27 |
| Hybrids | NKXS01003327.1 | 46561  | 0.27 |
| Hybrids | NKXS01003336.1 | 9742   | 0.27 |
| Hybrids | NKXS01003406.1 | 41425  | 0.27 |
| Hybrids | NKXS01003413.1 | 1062   | 0.27 |
| Hybrids | NKXS01003418.1 | 65162  | 0.27 |
| Hybrids | NKXS01003418.1 | 65267  | 0.27 |
| Hybrids | NKXS01003418.1 | 65273  | 0.27 |
| Hybrids | NKXS01003418.1 | 65314  | 0.27 |
| Hybrids | NKXS01003418.1 | 65374  | 0.27 |
| Hybrids | NKXS01003418.1 | 65385  | 0.27 |
| Hybrids | NKXS01003418.1 | 65420  | 0.27 |
| Hybrids | NKXS01003418.1 | 65423  | 0.27 |
| Hybrids | NKXS01003418.1 | 65441  | 0.27 |
| Hybrids | NKXS01003424.1 | 3860   | 0.27 |
| Hybrids | NKXS01003474.1 | 56145  | 0.27 |
| Hybrids | NKXS01003512.1 | 9590   | 0.27 |
| Hybrids | NKXS01003516.1 | 1213   | 0.27 |
| Hybrids | NKXS01003603.1 | 19615  | 0.27 |
| Hybrids | NKXS01003612.1 | 26746  | 0.27 |
| Hybrids | NKXS01003612.1 | 26931  | 0.27 |
| Hybrids | NKXS01003719.1 | 70873  | 0.27 |
| Hybrids | NKXS01003766.1 | 19486  | 0.27 |
| Hybrids | NKXS01003845.1 | 49304  | 0.27 |
| Hybrids | NKXS01003845.1 | 49347  | 0.27 |
| Hybrids | NKXS01003845.1 | 49431  | 0.27 |
| Hybrids | NKXS01003849.1 | 35909  | 0.27 |
| Hybrids | NKXS01003868.1 | 106857 | 0.27 |
| Hybrids | NKXS01003902.1 | 64951  | 0.27 |
| Hybrids | NKXS01003902.1 | 65070  | 0.27 |
| Hybrids | NKXS01003902.1 | 65125  | 0.27 |
| Hybrids | NKXS01003929.1 | 51090  | 0.27 |
| Hybrids | NKXS01003955.1 | 38682  | 0.27 |
| Hybrids | NKXS01003956.1 | 23921  | 0.27 |
| Hybrids | NKXS01003959.1 | 90572  | 0.27 |
| Hybrids | NKXS01003959.1 | 90674  | 0.27 |
| Hybrids | NKXS01003984.1 | 39380  | 0.27 |
| Hybrids | NKXS01004000.1 | 109927 | 0.27 |
| Hybrids | NKXS01004069.1 | 81710  | 0.27 |
| Hybrids | NKXS01004071.1 | 16493  | 0.27 |

|         |                |       |      |
|---------|----------------|-------|------|
| Hybrids | NKXS01004098.1 | 32492 | 0.27 |
| Hybrids | NKXS01004107.1 | 37461 | 0.27 |
| Hybrids | NKXS01004107.1 | 37546 | 0.27 |
| Hybrids | NKXS01004117.1 | 674   | 0.27 |
| Hybrids | NKXS01004117.1 | 690   | 0.27 |
| Hybrids | NKXS01004117.1 | 728   | 0.27 |
| Hybrids | NKXS01004117.1 | 826   | 0.27 |
| Hybrids | NKXS01004137.1 | 28926 | 0.27 |
| Hybrids | NKXS01004139.1 | 44260 | 0.27 |
| Hybrids | NKXS01004171.1 | 6113  | 0.27 |
| Hybrids | NKXS01004171.1 | 6145  | 0.27 |
| Hybrids | NKXS01004175.1 | 36406 | 0.27 |
| Hybrids | NKXS01004175.1 | 36410 | 0.27 |
| Hybrids | NKXS01004175.1 | 36532 | 0.27 |
| Hybrids | NKXS01004175.1 | 36569 | 0.27 |
| Hybrids | NKXS01004180.1 | 74507 | 0.27 |
| Hybrids | NKXS01004184.1 | 74641 | 0.27 |
| Hybrids | NKXS01004247.1 | 38809 | 0.27 |
| Hybrids | NKXS01004247.1 | 38811 | 0.27 |
| Hybrids | NKXS01004247.1 | 38822 | 0.27 |
| Hybrids | NKXS01004283.1 | 60548 | 0.27 |
| Hybrids | NKXS01004300.1 | 49887 | 0.27 |
| Hybrids | NKXS01004300.1 | 49991 | 0.27 |
| Hybrids | NKXS01004300.1 | 50054 | 0.27 |
| Hybrids | NKXS01004300.1 | 50062 | 0.27 |
| Hybrids | NKXS01004328.1 | 48519 | 0.27 |
| Hybrids | NKXS01004338.1 | 18054 | 0.27 |
| Hybrids | NKXS01004386.1 | 6895  | 0.27 |
| Hybrids | NKXS01004420.1 | 24344 | 0.27 |
| Hybrids | NKXS01004420.1 | 24478 | 0.27 |
| Hybrids | NKXS01004437.1 | 14595 | 0.27 |
| Hybrids | NKXS01004437.1 | 14597 | 0.27 |
| Hybrids | NKXS01004489.1 | 18415 | 0.27 |
| Hybrids | NKXS01004489.1 | 18597 | 0.27 |
| Hybrids | NKXS01004570.1 | 17335 | 0.27 |
| Hybrids | NKXS01004579.1 | 41263 | 0.27 |
| Hybrids | NKXS01004612.1 | 18208 | 0.27 |
| Hybrids | NKXS01004612.1 | 18225 | 0.27 |
| Hybrids | NKXS01004643.1 | 17179 | 0.27 |
| Hybrids | NKXS01004643.1 | 17396 | 0.27 |
| Hybrids | NKXS01004696.1 | 34273 | 0.27 |
| Hybrids | NKXS01004768.1 | 11400 | 0.27 |
| Hybrids | NKXS01004768.1 | 11440 | 0.27 |
| Hybrids | NKXS01004821.1 | 20346 | 0.27 |

|         |                |       |      |
|---------|----------------|-------|------|
| Hybrids | NKXS01004826.1 | 72408 | 0.27 |
| Hybrids | NKXS01004826.1 | 72522 | 0.27 |
| Hybrids | NKXS01004852.1 | 1116  | 0.27 |
| Hybrids | NKXS01004911.1 | 4740  | 0.27 |
| Hybrids | NKXS01004944.1 | 44881 | 0.27 |
| Hybrids | NKXS01004944.1 | 44934 | 0.27 |
| Hybrids | NKXS01004944.1 | 45011 | 0.27 |
| Hybrids | NKXS01004944.1 | 45080 | 0.27 |
| Hybrids | NKXS01004944.1 | 45090 | 0.27 |
| Hybrids | NKXS01004944.1 | 45092 | 0.27 |
| Hybrids | NKXS01004944.1 | 45119 | 0.27 |
| Hybrids | NKXS01004944.1 | 45200 | 0.27 |
| Hybrids | NKXS01004944.1 | 45233 | 0.27 |
| Hybrids | NKXS01004980.1 | 51009 | 0.27 |
| Hybrids | NKXS01004980.1 | 51089 | 0.27 |
| Hybrids | NKXS01004980.1 | 51118 | 0.27 |
| Hybrids | NKXS01005199.1 | 27955 | 0.27 |
| Hybrids | NKXS01005199.1 | 27990 | 0.27 |
| Hybrids | NKXS01005236.1 | 12344 | 0.27 |
| Hybrids | NKXS01005368.1 | 1214  | 0.27 |
| Hybrids | NKXS01005368.1 | 1240  | 0.27 |
| Hybrids | NKXS01005396.1 | 83601 | 0.27 |
| Hybrids | NKXS01005463.1 | 11566 | 0.27 |
| Hybrids | NKXS01005595.1 | 20402 | 0.27 |
| Hybrids | NKXS01005684.1 | 10442 | 0.27 |
| Hybrids | NKXS01005698.1 | 37716 | 0.27 |
| Hybrids | NKXS01005732.1 | 23526 | 0.27 |
| Hybrids | NKXS01005810.1 | 54550 | 0.27 |
| Hybrids | NKXS01005911.1 | 33927 | 0.27 |
| Hybrids | NKXS01005981.1 | 15508 | 0.27 |
| Hybrids | NKXS01005998.1 | 41081 | 0.27 |
| Hybrids | NKXS01005998.1 | 41093 | 0.27 |
| Hybrids | NKXS01006000.1 | 40675 | 0.27 |
| Hybrids | NKXS01006013.1 | 9201  | 0.27 |
| Hybrids | NKXS01006020.1 | 2655  | 0.27 |
| Hybrids | NKXS01006044.1 | 4217  | 0.27 |
| Hybrids | NKXS01006044.1 | 4269  | 0.27 |
| Hybrids | NKXS01006044.1 | 4353  | 0.27 |
| Hybrids | NKXS01006044.1 | 4370  | 0.27 |
| Hybrids | NKXS01006044.1 | 4407  | 0.27 |
| Hybrids | NKXS01006095.1 | 48658 | 0.27 |
| Hybrids | NKXS01006095.1 | 48789 | 0.27 |
| Hybrids | NKXS01006096.1 | 20510 | 0.27 |
| Hybrids | NKXS01006201.1 | 20156 | 0.27 |



|         |                |       |      |
|---------|----------------|-------|------|
| Hybrids | NKXS01006201.1 | 20165 | 0.27 |
| Hybrids | NKXS01006201.1 | 20207 | 0.27 |
| Hybrids | NKXS01006262.1 | 18642 | 0.27 |
| Hybrids | NKXS01006262.1 | 18658 | 0.27 |
| Hybrids | NKXS01006262.1 | 18894 | 0.27 |
| Hybrids | NKXS01006266.1 | 278   | 0.27 |
| Hybrids | NKXS01006347.1 | 15633 | 0.27 |
| Hybrids | NKXS01006347.1 | 15829 | 0.27 |
| Hybrids | NKXS01006381.1 | 24114 | 0.27 |
| Hybrids | NKXS01006474.1 | 26361 | 0.27 |
| Hybrids | NKXS01006474.1 | 26457 | 0.27 |
| Hybrids | NKXS01006590.1 | 32170 | 0.27 |
| Hybrids | NKXS01006590.1 | 32176 | 0.27 |
| Hybrids | NKXS01006590.1 | 32267 | 0.27 |
| Hybrids | NKXS01006639.1 | 42114 | 0.27 |
| Hybrids | NKXS01006639.1 | 42136 | 0.27 |
| Hybrids | NKXS01006659.1 | 22411 | 0.27 |
| Hybrids | NKXS01006752.1 | 5524  | 0.27 |
| Hybrids | NKXS01006761.1 | 7196  | 0.27 |
| Hybrids | NKXS01006843.1 | 410   | 0.27 |
| Hybrids | NKXS01006920.1 | 32162 | 0.27 |
| Hybrids | NKXS01006920.1 | 32170 | 0.27 |
| Hybrids | NKXS01006920.1 | 32195 | 0.27 |
| Hybrids | NKXS01006931.1 | 27439 | 0.27 |
| Hybrids | NKXS01007119.1 | 46604 | 0.27 |
| Hybrids | NKXS01007121.1 | 8709  | 0.27 |
| Hybrids | NKXS01007124.1 | 1450  | 0.27 |
| Hybrids | NKXS01007218.1 | 10284 | 0.27 |
| Hybrids | NKXS01007308.1 | 18380 | 0.27 |
| Hybrids | NKXS01007414.1 | 3297  | 0.27 |
| Hybrids | NKXS01007414.1 | 3419  | 0.27 |
| Hybrids | NKXS01007550.1 | 14885 | 0.27 |
| Hybrids | NKXS01007673.1 | 15854 | 0.27 |
| Hybrids | NKXS01007673.1 | 15895 | 0.27 |
| Hybrids | NKXS01007673.1 | 16022 | 0.27 |
| Hybrids | NKXS01007703.1 | 11882 | 0.27 |
| Hybrids | NKXS01007704.1 | 14742 | 0.27 |
| Hybrids | NKXS01007704.1 | 14801 | 0.27 |
| Hybrids | NKXS01007704.1 | 14963 | 0.27 |
| Hybrids | NKXS01007843.1 | 2175  | 0.27 |
| Hybrids | NKXS01007843.1 | 2188  | 0.27 |
| Hybrids | NKXS01007933.1 | 20266 | 0.27 |
| Hybrids | NKXS01007936.1 | 8634  | 0.27 |
| Hybrids | NKXS01008255.1 | 6081  | 0.27 |

|         |                |        |      |
|---------|----------------|--------|------|
| Hybrids | NKXS01008321.1 | 13880  | 0.27 |
| Hybrids | NKXS01008530.1 | 17022  | 0.27 |
| Hybrids | NKXS01008628.1 | 14708  | 0.27 |
| Hybrids | NKXS01008860.1 | 5032   | 0.27 |
| Hybrids | NKXS01008874.1 | 3167   | 0.27 |
| Hybrids | NKXS01008874.1 | 3308   | 0.27 |
| Hybrids | NKXS01008898.1 | 4381   | 0.27 |
| Hybrids | NKXS01008898.1 | 6694   | 0.27 |
| Hybrids | NKXS01008898.1 | 6752   | 0.27 |
| Hybrids | NKXS01008955.1 | 13815  | 0.27 |
| Hybrids | NKXS01008955.1 | 13826  | 0.27 |
| Hybrids | NKXS01008985.1 | 9862   | 0.27 |
| Hybrids | NKXS01009093.1 | 4043   | 0.27 |
| Hybrids | NKXS01009093.1 | 4074   | 0.27 |
| Hybrids | NKXS01009215.1 | 11800  | 0.27 |
| Hybrids | NKXS01009215.1 | 11841  | 0.27 |
| Hybrids | NKXS01009215.1 | 11846  | 0.27 |
| Hybrids | NKXS01009215.1 | 11896  | 0.27 |
| Hybrids | NKXS01009215.1 | 11899  | 0.27 |
| Hybrids | NKXS01009604.1 | 5528   | 0.27 |
| Hybrids | NKXS01010170.1 | 1366   | 0.27 |
| Hybrids | NKXS01010285.1 | 61     | 0.27 |
| Hybrids | NKXS01010411.1 | 4237   | 0.27 |
| Hybrids | NKXS01010783.1 | 2806   | 0.27 |
| Hybrids | NKXS01012469.1 | 1009   | 0.27 |
| Hybrids | NKXS01012469.1 | 1045   | 0.27 |
| Hybrids | NKXS01012469.1 | 1070   | 0.27 |
| Hybrids | NKXS01012469.1 | 1085   | 0.27 |
| Hybrids | NKXS01012469.1 | 207    | 0.27 |
| Hybrids | NKXS01012469.1 | 916    | 0.27 |
| Hybrids | NKXS01000006.1 | 31249  | 0.18 |
| Hybrids | NKXS01000006.1 | 31277  | 0.18 |
| Hybrids | NKXS01000006.1 | 31305  | 0.18 |
| Hybrids | NKXS01000017.1 | 167485 | 0.18 |
| Hybrids | NKXS01000017.1 | 89878  | 0.18 |
| Hybrids | NKXS01000017.1 | 89917  | 0.18 |
| Hybrids | NKXS01000021.1 | 211273 | 0.18 |
| Hybrids | NKXS01000021.1 | 211326 | 0.18 |
| Hybrids | NKXS01000021.1 | 211413 | 0.18 |
| Hybrids | NKXS01000021.1 | 211422 | 0.18 |
| Hybrids | NKXS01000023.1 | 461515 | 0.18 |
| Hybrids | NKXS01000037.1 | 66848  | 0.18 |
| Hybrids | NKXS01000050.1 | 217540 | 0.18 |
| Hybrids | NKXS01000050.1 | 217587 | 0.18 |

|         |                |        |      |
|---------|----------------|--------|------|
| Hybrids | NKXS01000050.1 | 217603 | 0.18 |
| Hybrids | NKXS01000064.1 | 199061 | 0.18 |
| Hybrids | NKXS01000075.1 | 48585  | 0.18 |
| Hybrids | NKXS01000075.1 | 49548  | 0.18 |
| Hybrids | NKXS01000079.1 | 38036  | 0.18 |
| Hybrids | NKXS01000081.1 | 58467  | 0.18 |
| Hybrids | NKXS01000081.1 | 58581  | 0.18 |
| Hybrids | NKXS01000081.1 | 58618  | 0.18 |
| Hybrids | NKXS01000087.1 | 12667  | 0.18 |
| Hybrids | NKXS01000087.1 | 12805  | 0.18 |
| Hybrids | NKXS01000090.1 | 83489  | 0.18 |
| Hybrids | NKXS01000090.1 | 83495  | 0.18 |
| Hybrids | NKXS01000090.1 | 83497  | 0.18 |
| Hybrids | NKXS01000090.1 | 83574  | 0.18 |
| Hybrids | NKXS01000090.1 | 83697  | 0.18 |
| Hybrids | NKXS01000094.1 | 184747 | 0.18 |
| Hybrids | NKXS01000102.1 | 85372  | 0.18 |
| Hybrids | NKXS01000114.1 | 34527  | 0.18 |
| Hybrids | NKXS01000119.1 | 8688   | 0.18 |
| Hybrids | NKXS01000189.1 | 40243  | 0.18 |
| Hybrids | NKXS01000208.1 | 47949  | 0.18 |
| Hybrids | NKXS01000241.1 | 186160 | 0.18 |
| Hybrids | NKXS01000253.1 | 99136  | 0.18 |
| Hybrids | NKXS01000253.1 | 99178  | 0.18 |
| Hybrids | NKXS01000257.1 | 25773  | 0.18 |
| Hybrids | NKXS01000257.1 | 51617  | 0.18 |
| Hybrids | NKXS01000257.1 | 51679  | 0.18 |
| Hybrids | NKXS01000298.1 | 171778 | 0.18 |
| Hybrids | NKXS01000316.1 | 15602  | 0.18 |
| Hybrids | NKXS01000321.1 | 120578 | 0.18 |
| Hybrids | NKXS01000330.1 | 5413   | 0.18 |
| Hybrids | NKXS01000344.1 | 148999 | 0.18 |
| Hybrids | NKXS01000359.1 | 183498 | 0.18 |
| Hybrids | NKXS01000364.1 | 110954 | 0.18 |
| Hybrids | NKXS01000415.1 | 133706 | 0.18 |
| Hybrids | NKXS01000422.1 | 45549  | 0.18 |
| Hybrids | NKXS01000422.1 | 45593  | 0.18 |
| Hybrids | NKXS01000444.1 | 71717  | 0.18 |
| Hybrids | NKXS01000468.1 | 10513  | 0.18 |
| Hybrids | NKXS01000468.1 | 10587  | 0.18 |
| Hybrids | NKXS01000524.1 | 11469  | 0.18 |
| Hybrids | NKXS01000524.1 | 11471  | 0.18 |
| Hybrids | NKXS01000546.1 | 29733  | 0.18 |
| Hybrids | NKXS01000581.1 | 128835 | 0.18 |

|         |                |        |      |
|---------|----------------|--------|------|
| Hybrids | NKXS01000584.1 | 31768  | 0.18 |
| Hybrids | NKXS01000593.1 | 16183  | 0.18 |
| Hybrids | NKXS01000602.1 | 150074 | 0.18 |
| Hybrids | NKXS01000603.1 | 79122  | 0.18 |
| Hybrids | NKXS01000655.1 | 56473  | 0.18 |
| Hybrids | NKXS01000662.1 | 79448  | 0.18 |
| Hybrids | NKXS01000669.1 | 11097  | 0.18 |
| Hybrids | NKXS01000669.1 | 11222  | 0.18 |
| Hybrids | NKXS01000697.1 | 42953  | 0.18 |
| Hybrids | NKXS01000703.1 | 44603  | 0.18 |
| Hybrids | NKXS01000727.1 | 150153 | 0.18 |
| Hybrids | NKXS01000733.1 | 90988  | 0.18 |
| Hybrids | NKXS01000734.1 | 69393  | 0.18 |
| Hybrids | NKXS01000775.1 | 83095  | 0.18 |
| Hybrids | NKXS01000852.1 | 102664 | 0.18 |
| Hybrids | NKXS01000852.1 | 102672 | 0.18 |
| Hybrids | NKXS01000852.1 | 102676 | 0.18 |
| Hybrids | NKXS01000852.1 | 107294 | 0.18 |
| Hybrids | NKXS01000852.1 | 110443 | 0.18 |
| Hybrids | NKXS01000852.1 | 110482 | 0.18 |
| Hybrids | NKXS01000852.1 | 110526 | 0.18 |
| Hybrids | NKXS01000852.1 | 110557 | 0.18 |
| Hybrids | NKXS01000852.1 | 119067 | 0.18 |
| Hybrids | NKXS01000869.1 | 129774 | 0.18 |
| Hybrids | NKXS01000893.1 | 75777  | 0.18 |
| Hybrids | NKXS01000893.1 | 75840  | 0.18 |
| Hybrids | NKXS01000905.1 | 102506 | 0.18 |
| Hybrids | NKXS01000905.1 | 102674 | 0.18 |
| Hybrids | NKXS01000905.1 | 102680 | 0.18 |
| Hybrids | NKXS01000906.1 | 53296  | 0.18 |
| Hybrids | NKXS01000906.1 | 53342  | 0.18 |
| Hybrids | NKXS01000959.1 | 21690  | 0.18 |
| Hybrids | NKXS01001002.1 | 96557  | 0.18 |
| Hybrids | NKXS01001059.1 | 139874 | 0.18 |
| Hybrids | NKXS01001078.1 | 11041  | 0.18 |
| Hybrids | NKXS01001085.1 | 39316  | 0.18 |
| Hybrids | NKXS01001127.1 | 42849  | 0.18 |
| Hybrids | NKXS01001134.1 | 14407  | 0.18 |
| Hybrids | NKXS01001134.1 | 9754   | 0.18 |
| Hybrids | NKXS01001189.1 | 225856 | 0.18 |
| Hybrids | NKXS01001189.1 | 226516 | 0.18 |
| Hybrids | NKXS01001189.1 | 63286  | 0.18 |
| Hybrids | NKXS01001189.1 | 63300  | 0.18 |
| Hybrids | NKXS01001193.1 | 38782  | 0.18 |

|         |                |        |      |
|---------|----------------|--------|------|
| Hybrids | NKXS01001193.1 | 38858  | 0.18 |
| Hybrids | NKXS01001193.1 | 38910  | 0.18 |
| Hybrids | NKXS01001212.1 | 88968  | 0.18 |
| Hybrids | NKXS01001232.1 | 78155  | 0.18 |
| Hybrids | NKXS01001288.1 | 25959  | 0.18 |
| Hybrids | NKXS01001288.1 | 25968  | 0.18 |
| Hybrids | NKXS01001288.1 | 26022  | 0.18 |
| Hybrids | NKXS01001289.1 | 55326  | 0.18 |
| Hybrids | NKXS01001289.1 | 55409  | 0.18 |
| Hybrids | NKXS01001307.1 | 93371  | 0.18 |
| Hybrids | NKXS01001328.1 | 60442  | 0.18 |
| Hybrids | NKXS01001366.1 | 33904  | 0.18 |
| Hybrids | NKXS01001377.1 | 40240  | 0.18 |
| Hybrids | NKXS01001400.1 | 10071  | 0.18 |
| Hybrids | NKXS01001400.1 | 10078  | 0.18 |
| Hybrids | NKXS01001400.1 | 10108  | 0.18 |
| Hybrids | NKXS01001445.1 | 155313 | 0.18 |
| Hybrids | NKXS01001448.1 | 83873  | 0.18 |
| Hybrids | NKXS01001472.1 | 36939  | 0.18 |
| Hybrids | NKXS01001534.1 | 11173  | 0.18 |
| Hybrids | NKXS01001534.1 | 11351  | 0.18 |
| Hybrids | NKXS01001584.1 | 101103 | 0.18 |
| Hybrids | NKXS01001617.1 | 41915  | 0.18 |
| Hybrids | NKXS01001620.1 | 21790  | 0.18 |
| Hybrids | NKXS01001621.1 | 34763  | 0.18 |
| Hybrids | NKXS01001639.1 | 5198   | 0.18 |
| Hybrids | NKXS01001642.1 | 75917  | 0.18 |
| Hybrids | NKXS01001642.1 | 76112  | 0.18 |
| Hybrids | NKXS01001680.1 | 10136  | 0.18 |
| Hybrids | NKXS01001697.1 | 95264  | 0.18 |
| Hybrids | NKXS01001697.1 | 95337  | 0.18 |
| Hybrids | NKXS01001697.1 | 95338  | 0.18 |
| Hybrids | NKXS01001697.1 | 95444  | 0.18 |
| Hybrids | NKXS01001697.1 | 95484  | 0.18 |
| Hybrids | NKXS01001697.1 | 95539  | 0.18 |
| Hybrids | NKXS01001707.1 | 17243  | 0.18 |
| Hybrids | NKXS01001777.1 | 8582   | 0.18 |
| Hybrids | NKXS01001778.1 | 42639  | 0.18 |
| Hybrids | NKXS01001778.1 | 42701  | 0.18 |
| Hybrids | NKXS01001796.1 | 106476 | 0.18 |
| Hybrids | NKXS01001812.1 | 35443  | 0.18 |
| Hybrids | NKXS01001817.1 | 26120  | 0.18 |
| Hybrids | NKXS01001881.1 | 10348  | 0.18 |
| Hybrids | NKXS01001924.1 | 105194 | 0.18 |

|         |                |        |      |
|---------|----------------|--------|------|
| Hybrids | NKXS01001972.1 | 6957   | 0.18 |
| Hybrids | NKXS01001985.1 | 79437  | 0.18 |
| Hybrids | NKXS01001985.1 | 79527  | 0.18 |
| Hybrids | NKXS01001991.1 | 5342   | 0.18 |
| Hybrids | NKXS01002014.1 | 23184  | 0.18 |
| Hybrids | NKXS01002016.1 | 111790 | 0.18 |
| Hybrids | NKXS01002133.1 | 33218  | 0.18 |
| Hybrids | NKXS01002133.1 | 33278  | 0.18 |
| Hybrids | NKXS01002148.1 | 12324  | 0.18 |
| Hybrids | NKXS01002148.1 | 57160  | 0.18 |
| Hybrids | NKXS01002171.1 | 33965  | 0.18 |
| Hybrids | NKXS01002178.1 | 5411   | 0.18 |
| Hybrids | NKXS01002182.1 | 1871   | 0.18 |
| Hybrids | NKXS01002182.1 | 1886   | 0.18 |
| Hybrids | NKXS01002182.1 | 1927   | 0.18 |
| Hybrids | NKXS01002182.1 | 1947   | 0.18 |
| Hybrids | NKXS01002192.1 | 81106  | 0.18 |
| Hybrids | NKXS01002192.1 | 81243  | 0.18 |
| Hybrids | NKXS01002192.1 | 81247  | 0.18 |
| Hybrids | NKXS01002192.1 | 81255  | 0.18 |
| Hybrids | NKXS01002192.1 | 81273  | 0.18 |
| Hybrids | NKXS01002192.1 | 81285  | 0.18 |
| Hybrids | NKXS01002207.1 | 100484 | 0.18 |
| Hybrids | NKXS01002213.1 | 35484  | 0.18 |
| Hybrids | NKXS01002238.1 | 38533  | 0.18 |
| Hybrids | NKXS01002249.1 | 56694  | 0.18 |
| Hybrids | NKXS01002249.1 | 56862  | 0.18 |
| Hybrids | NKXS01002312.1 | 25345  | 0.18 |
| Hybrids | NKXS01002328.1 | 79204  | 0.18 |
| Hybrids | NKXS01002328.1 | 79206  | 0.18 |
| Hybrids | NKXS01002328.1 | 79220  | 0.18 |
| Hybrids | NKXS01002328.1 | 79232  | 0.18 |
| Hybrids | NKXS01002328.1 | 79250  | 0.18 |
| Hybrids | NKXS01002328.1 | 79265  | 0.18 |
| Hybrids | NKXS01002328.1 | 79269  | 0.18 |
| Hybrids | NKXS01002328.1 | 79275  | 0.18 |
| Hybrids | NKXS01002328.1 | 79288  | 0.18 |
| Hybrids | NKXS01002328.1 | 79295  | 0.18 |
| Hybrids | NKXS01002328.1 | 79299  | 0.18 |
| Hybrids | NKXS01002328.1 | 79300  | 0.18 |
| Hybrids | NKXS01002328.1 | 79317  | 0.18 |
| Hybrids | NKXS01002328.1 | 79325  | 0.18 |
| Hybrids | NKXS01002328.1 | 79327  | 0.18 |
| Hybrids | NKXS01002380.1 | 75335  | 0.18 |

|         |                |        |      |
|---------|----------------|--------|------|
| Hybrids | NKXS01002387.1 | 11059  | 0.18 |
| Hybrids | NKXS01002387.1 | 11274  | 0.18 |
| Hybrids | NKXS01002387.1 | 11305  | 0.18 |
| Hybrids | NKXS01002387.1 | 11407  | 0.18 |
| Hybrids | NKXS01002399.1 | 118049 | 0.18 |
| Hybrids | NKXS01002411.1 | 10117  | 0.18 |
| Hybrids | NKXS01002421.1 | 77161  | 0.18 |
| Hybrids | NKXS01002456.1 | 84911  | 0.18 |
| Hybrids | NKXS01002456.1 | 85004  | 0.18 |
| Hybrids | NKXS01002456.1 | 85012  | 0.18 |
| Hybrids | NKXS01002469.1 | 99614  | 0.18 |
| Hybrids | NKXS01002470.1 | 34951  | 0.18 |
| Hybrids | NKXS01002470.1 | 34978  | 0.18 |
| Hybrids | NKXS01002470.1 | 34986  | 0.18 |
| Hybrids | NKXS01002470.1 | 34988  | 0.18 |
| Hybrids | NKXS01002470.1 | 34989  | 0.18 |
| Hybrids | NKXS01002470.1 | 34990  | 0.18 |
| Hybrids | NKXS01002470.1 | 35000  | 0.18 |
| Hybrids | NKXS01002470.1 | 35056  | 0.18 |
| Hybrids | NKXS01002490.1 | 38287  | 0.18 |
| Hybrids | NKXS01002502.1 | 19707  | 0.18 |
| Hybrids | NKXS01002555.1 | 35275  | 0.18 |
| Hybrids | NKXS01002604.1 | 53020  | 0.18 |
| Hybrids | NKXS01002622.1 | 48466  | 0.18 |
| Hybrids | NKXS01002661.1 | 45943  | 0.18 |
| Hybrids | NKXS01002661.1 | 73112  | 0.18 |
| Hybrids | NKXS01002661.1 | 73166  | 0.18 |
| Hybrids | NKXS01002661.1 | 73251  | 0.18 |
| Hybrids | NKXS01002685.1 | 77235  | 0.18 |
| Hybrids | NKXS01002705.1 | 210478 | 0.18 |
| Hybrids | NKXS01002705.1 | 210508 | 0.18 |
| Hybrids | NKXS01002730.1 | 26371  | 0.18 |
| Hybrids | NKXS01002730.1 | 26460  | 0.18 |
| Hybrids | NKXS01002730.1 | 26537  | 0.18 |
| Hybrids | NKXS01002742.1 | 447    | 0.18 |
| Hybrids | NKXS01002745.1 | 33477  | 0.18 |
| Hybrids | NKXS01002756.1 | 44766  | 0.18 |
| Hybrids | NKXS01002825.1 | 112042 | 0.18 |
| Hybrids | NKXS01002838.1 | 56994  | 0.18 |
| Hybrids | NKXS01002838.1 | 56998  | 0.18 |
| Hybrids | NKXS01002838.1 | 57071  | 0.18 |
| Hybrids | NKXS01002919.1 | 41991  | 0.18 |
| Hybrids | NKXS01002947.1 | 51703  | 0.18 |
| Hybrids | NKXS01002982.1 | 7943   | 0.18 |

|         |                |        |      |
|---------|----------------|--------|------|
| Hybrids | NKXS01002982.1 | 8055   | 0.18 |
| Hybrids | NKXS01002982.1 | 8081   | 0.18 |
| Hybrids | NKXS01002982.1 | 8111   | 0.18 |
| Hybrids | NKXS01003001.1 | 67531  | 0.18 |
| Hybrids | NKXS01003105.1 | 56409  | 0.18 |
| Hybrids | NKXS01003105.1 | 56541  | 0.18 |
| Hybrids | NKXS01003115.1 | 72708  | 0.18 |
| Hybrids | NKXS01003120.1 | 4983   | 0.18 |
| Hybrids | NKXS01003153.1 | 106473 | 0.18 |
| Hybrids | NKXS01003153.1 | 106518 | 0.18 |
| Hybrids | NKXS01003207.1 | 10761  | 0.18 |
| Hybrids | NKXS01003278.1 | 59745  | 0.18 |
| Hybrids | NKXS01003278.1 | 59770  | 0.18 |
| Hybrids | NKXS01003278.1 | 59778  | 0.18 |
| Hybrids | NKXS01003278.1 | 59803  | 0.18 |
| Hybrids | NKXS01003278.1 | 62003  | 0.18 |
| Hybrids | NKXS01003278.1 | 62012  | 0.18 |
| Hybrids | NKXS01003278.1 | 62071  | 0.18 |
| Hybrids | NKXS01003336.1 | 9623   | 0.18 |
| Hybrids | NKXS01003336.1 | 9698   | 0.18 |
| Hybrids | NKXS01003344.1 | 13120  | 0.18 |
| Hybrids | NKXS01003344.1 | 24440  | 0.18 |
| Hybrids | NKXS01003365.1 | 26523  | 0.18 |
| Hybrids | NKXS01003382.1 | 39336  | 0.18 |
| Hybrids | NKXS01003395.1 | 8962   | 0.18 |
| Hybrids | NKXS01003395.1 | 8990   | 0.18 |
| Hybrids | NKXS01003395.1 | 9007   | 0.18 |
| Hybrids | NKXS01003395.1 | 9008   | 0.18 |
| Hybrids | NKXS01003423.1 | 5579   | 0.18 |
| Hybrids | NKXS01003459.1 | 40993  | 0.18 |
| Hybrids | NKXS01003459.1 | 41034  | 0.18 |
| Hybrids | NKXS01003459.1 | 41081  | 0.18 |
| Hybrids | NKXS01003459.1 | 41085  | 0.18 |
| Hybrids | NKXS01003480.1 | 9433   | 0.18 |
| Hybrids | NKXS01003490.1 | 12645  | 0.18 |
| Hybrids | NKXS01003490.1 | 13421  | 0.18 |
| Hybrids | NKXS01003596.1 | 102610 | 0.18 |
| Hybrids | NKXS01003596.1 | 102679 | 0.18 |
| Hybrids | NKXS01003596.1 | 102700 | 0.18 |
| Hybrids | NKXS01003596.1 | 102758 | 0.18 |
| Hybrids | NKXS01003599.1 | 2621   | 0.18 |
| Hybrids | NKXS01003603.1 | 2876   | 0.18 |
| Hybrids | NKXS01003603.1 | 2897   | 0.18 |
| Hybrids | NKXS01003612.1 | 26766  | 0.18 |



|         |                |        |      |
|---------|----------------|--------|------|
| Hybrids | NKXS01003612.1 | 26913  | 0.18 |
| Hybrids | NKXS01003623.1 | 75937  | 0.18 |
| Hybrids | NKXS01003713.1 | 39674  | 0.18 |
| Hybrids | NKXS01003719.1 | 70899  | 0.18 |
| Hybrids | NKXS01003744.1 | 41646  | 0.18 |
| Hybrids | NKXS01003744.1 | 41774  | 0.18 |
| Hybrids | NKXS01003815.1 | 49173  | 0.18 |
| Hybrids | NKXS01003849.1 | 35962  | 0.18 |
| Hybrids | NKXS01003902.1 | 64995  | 0.18 |
| Hybrids | NKXS01003902.1 | 65011  | 0.18 |
| Hybrids | NKXS01003902.1 | 65016  | 0.18 |
| Hybrids | NKXS01003902.1 | 65056  | 0.18 |
| Hybrids | NKXS01003902.1 | 65061  | 0.18 |
| Hybrids | NKXS01003918.1 | 136490 | 0.18 |
| Hybrids | NKXS01003925.1 | 28420  | 0.18 |
| Hybrids | NKXS01003947.1 | 41924  | 0.18 |
| Hybrids | NKXS01003955.1 | 38629  | 0.18 |
| Hybrids | NKXS01003956.1 | 23827  | 0.18 |
| Hybrids | NKXS01003959.1 | 90660  | 0.18 |
| Hybrids | NKXS01003982.1 | 25979  | 0.18 |
| Hybrids | NKXS01003982.1 | 26033  | 0.18 |
| Hybrids | NKXS01004037.1 | 69854  | 0.18 |
| Hybrids | NKXS01004037.1 | 69874  | 0.18 |
| Hybrids | NKXS01004076.1 | 32822  | 0.18 |
| Hybrids | NKXS01004076.1 | 32865  | 0.18 |
| Hybrids | NKXS01004098.1 | 32452  | 0.18 |
| Hybrids | NKXS01004107.1 | 37406  | 0.18 |
| Hybrids | NKXS01004122.1 | 10733  | 0.18 |
| Hybrids | NKXS01004122.1 | 10882  | 0.18 |
| Hybrids | NKXS01004139.1 | 44282  | 0.18 |
| Hybrids | NKXS01004139.1 | 44352  | 0.18 |
| Hybrids | NKXS01004235.1 | 60205  | 0.18 |
| Hybrids | NKXS01004235.1 | 60223  | 0.18 |
| Hybrids | NKXS01004245.1 | 19427  | 0.18 |
| Hybrids | NKXS01004245.1 | 19595  | 0.18 |
| Hybrids | NKXS01004247.1 | 38660  | 0.18 |
| Hybrids | NKXS01004283.1 | 25492  | 0.18 |
| Hybrids | NKXS01004283.1 | 25530  | 0.18 |
| Hybrids | NKXS01004283.1 | 60637  | 0.18 |
| Hybrids | NKXS01004283.1 | 63149  | 0.18 |
| Hybrids | NKXS01004283.1 | 63190  | 0.18 |
| Hybrids | NKXS01004283.1 | 63291  | 0.18 |
| Hybrids | NKXS01004320.1 | 45440  | 0.18 |
| Hybrids | NKXS01004320.1 | 45505  | 0.18 |

|         |                |       |      |
|---------|----------------|-------|------|
| Hybrids | NKXS01004320.1 | 45553 | 0.18 |
| Hybrids | NKXS01004323.1 | 3137  | 0.18 |
| Hybrids | NKXS01004328.1 | 48541 | 0.18 |
| Hybrids | NKXS01004328.1 | 48572 | 0.18 |
| Hybrids | NKXS01004328.1 | 48577 | 0.18 |
| Hybrids | NKXS01004328.1 | 48581 | 0.18 |
| Hybrids | NKXS01004328.1 | 48585 | 0.18 |
| Hybrids | NKXS01004328.1 | 48591 | 0.18 |
| Hybrids | NKXS01004328.1 | 48646 | 0.18 |
| Hybrids | NKXS01004338.1 | 17855 | 0.18 |
| Hybrids | NKXS01004338.1 | 17862 | 0.18 |
| Hybrids | NKXS01004381.1 | 56638 | 0.18 |
| Hybrids | NKXS01004381.1 | 56643 | 0.18 |
| Hybrids | NKXS01004420.1 | 24447 | 0.18 |
| Hybrids | NKXS01004420.1 | 24471 | 0.18 |
| Hybrids | NKXS01004473.1 | 7014  | 0.18 |
| Hybrids | NKXS01004473.1 | 7221  | 0.18 |
| Hybrids | NKXS01004485.1 | 30046 | 0.18 |
| Hybrids | NKXS01004485.1 | 30290 | 0.18 |
| Hybrids | NKXS01004486.1 | 39924 | 0.18 |
| Hybrids | NKXS01004486.1 | 40000 | 0.18 |
| Hybrids | NKXS01004535.1 | 13391 | 0.18 |
| Hybrids | NKXS01004543.1 | 43856 | 0.18 |
| Hybrids | NKXS01004579.1 | 41304 | 0.18 |
| Hybrids | NKXS01004584.1 | 23453 | 0.18 |
| Hybrids | NKXS01004620.1 | 9378  | 0.18 |
| Hybrids | NKXS01004620.1 | 9977  | 0.18 |
| Hybrids | NKXS01004803.1 | 23006 | 0.18 |
| Hybrids | NKXS01004812.1 | 29713 | 0.18 |
| Hybrids | NKXS01004812.1 | 29721 | 0.18 |
| Hybrids | NKXS01004852.1 | 912   | 0.18 |
| Hybrids | NKXS01005018.1 | 21929 | 0.18 |
| Hybrids | NKXS01005069.1 | 17683 | 0.18 |
| Hybrids | NKXS01005121.1 | 29049 | 0.18 |
| Hybrids | NKXS01005121.1 | 29105 | 0.18 |
| Hybrids | NKXS01005135.1 | 12438 | 0.18 |
| Hybrids | NKXS01005135.1 | 12446 | 0.18 |
| Hybrids | NKXS01005135.1 | 12480 | 0.18 |
| Hybrids | NKXS01005135.1 | 12639 | 0.18 |
| Hybrids | NKXS01005218.1 | 41578 | 0.18 |
| Hybrids | NKXS01005312.1 | 11802 | 0.18 |
| Hybrids | NKXS01005368.1 | 1271  | 0.18 |
| Hybrids | NKXS01005368.1 | 1310  | 0.18 |
| Hybrids | NKXS01005368.1 | 1321  | 0.18 |

|         |                |       |      |
|---------|----------------|-------|------|
| Hybrids | NKXS01005417.1 | 48351 | 0.18 |
| Hybrids | NKXS01005430.1 | 25970 | 0.18 |
| Hybrids | NKXS01005434.1 | 3345  | 0.18 |
| Hybrids | NKXS01005434.1 | 3347  | 0.18 |
| Hybrids | NKXS01005434.1 | 3417  | 0.18 |
| Hybrids | NKXS01005434.1 | 3420  | 0.18 |
| Hybrids | NKXS01005434.1 | 3456  | 0.18 |
| Hybrids | NKXS01005434.1 | 3458  | 0.18 |
| Hybrids | NKXS01005461.1 | 3764  | 0.18 |
| Hybrids | NKXS01005463.1 | 11721 | 0.18 |
| Hybrids | NKXS01005463.1 | 11736 | 0.18 |
| Hybrids | NKXS01005540.1 | 5031  | 0.18 |
| Hybrids | NKXS01005576.1 | 27372 | 0.18 |
| Hybrids | NKXS01005684.1 | 10406 | 0.18 |
| Hybrids | NKXS01005684.1 | 10472 | 0.18 |
| Hybrids | NKXS01005684.1 | 10495 | 0.18 |
| Hybrids | NKXS01005684.1 | 10497 | 0.18 |
| Hybrids | NKXS01005684.1 | 10565 | 0.18 |
| Hybrids | NKXS01005698.1 | 37761 | 0.18 |
| Hybrids | NKXS01005698.1 | 37778 | 0.18 |
| Hybrids | NKXS01005698.1 | 37886 | 0.18 |
| Hybrids | NKXS01005698.1 | 37941 | 0.18 |
| Hybrids | NKXS01005698.1 | 37965 | 0.18 |
| Hybrids | NKXS01005698.1 | 37971 | 0.18 |
| Hybrids | NKXS01005725.1 | 43256 | 0.18 |
| Hybrids | NKXS01005806.1 | 2464  | 0.18 |
| Hybrids | NKXS01005810.1 | 54444 | 0.18 |
| Hybrids | NKXS01005810.1 | 54547 | 0.18 |
| Hybrids | NKXS01005810.1 | 54557 | 0.18 |
| Hybrids | NKXS01005810.1 | 54563 | 0.18 |
| Hybrids | NKXS01005810.1 | 54667 | 0.18 |
| Hybrids | NKXS01005933.1 | 69631 | 0.18 |
| Hybrids | NKXS01005969.1 | 11227 | 0.18 |
| Hybrids | NKXS01005974.1 | 16799 | 0.18 |
| Hybrids | NKXS01005992.1 | 41478 | 0.18 |
| Hybrids | NKXS01006013.1 | 9271  | 0.18 |
| Hybrids | NKXS01006013.1 | 9304  | 0.18 |
| Hybrids | NKXS01006013.1 | 9327  | 0.18 |
| Hybrids | NKXS01006013.1 | 9420  | 0.18 |
| Hybrids | NKXS01006044.1 | 4365  | 0.18 |
| Hybrids | NKXS01006083.1 | 33419 | 0.18 |
| Hybrids | NKXS01006094.1 | 18331 | 0.18 |
| Hybrids | NKXS01006094.1 | 6396  | 0.18 |
| Hybrids | NKXS01006155.1 | 34348 | 0.18 |

|         |                |       |      |
|---------|----------------|-------|------|
| Hybrids | NKXS01006201.1 | 20150 | 0.18 |
| Hybrids | NKXS01006201.1 | 20180 | 0.18 |
| Hybrids | NKXS01006304.1 | 40753 | 0.18 |
| Hybrids | NKXS01006314.1 | 62659 | 0.18 |
| Hybrids | NKXS01006347.1 | 15839 | 0.18 |
| Hybrids | NKXS01006381.1 | 24056 | 0.18 |
| Hybrids | NKXS01006381.1 | 24282 | 0.18 |
| Hybrids | NKXS01006416.1 | 37539 | 0.18 |
| Hybrids | NKXS01006479.1 | 34383 | 0.18 |
| Hybrids | NKXS01006590.1 | 32221 | 0.18 |
| Hybrids | NKXS01006590.1 | 32229 | 0.18 |
| Hybrids | NKXS01006590.1 | 32233 | 0.18 |
| Hybrids | NKXS01006714.1 | 10381 | 0.18 |
| Hybrids | NKXS01006739.1 | 20576 | 0.18 |
| Hybrids | NKXS01006739.1 | 28280 | 0.18 |
| Hybrids | NKXS01006843.1 | 507   | 0.18 |
| Hybrids | NKXS01007119.1 | 46748 | 0.18 |
| Hybrids | NKXS01007189.1 | 18665 | 0.18 |
| Hybrids | NKXS01007227.1 | 21581 | 0.18 |
| Hybrids | NKXS01007333.1 | 5123  | 0.18 |
| Hybrids | NKXS01007414.1 | 3400  | 0.18 |
| Hybrids | NKXS01007501.1 | 735   | 0.18 |
| Hybrids | NKXS01007519.1 | 11134 | 0.18 |
| Hybrids | NKXS01007580.1 | 2230  | 0.18 |
| Hybrids | NKXS01007843.1 | 2104  | 0.18 |
| Hybrids | NKXS01007843.1 | 2108  | 0.18 |
| Hybrids | NKXS01007843.1 | 2183  | 0.18 |
| Hybrids | NKXS01007843.1 | 2186  | 0.18 |
| Hybrids | NKXS01007843.1 | 2257  | 0.18 |
| Hybrids | NKXS01007927.1 | 17203 | 0.18 |
| Hybrids | NKXS01007985.1 | 6786  | 0.18 |
| Hybrids | NKXS01008034.1 | 13674 | 0.18 |
| Hybrids | NKXS01008255.1 | 6115  | 0.18 |
| Hybrids | NKXS01008270.1 | 710   | 0.18 |
| Hybrids | NKXS01008270.1 | 851   | 0.18 |
| Hybrids | NKXS01008321.1 | 19938 | 0.18 |
| Hybrids | NKXS01008321.1 | 20175 | 0.18 |
| Hybrids | NKXS01008444.1 | 3760  | 0.18 |
| Hybrids | NKXS01008530.1 | 16988 | 0.18 |
| Hybrids | NKXS01008530.1 | 17172 | 0.18 |
| Hybrids | NKXS01008604.1 | 2561  | 0.18 |
| Hybrids | NKXS01008860.1 | 4935  | 0.18 |
| Hybrids | NKXS01008896.1 | 9313  | 0.18 |
| Hybrids | NKXS01008896.1 | 9564  | 0.18 |

|         |                |       |      |
|---------|----------------|-------|------|
| Hybrids | NKXS01008898.1 | 4526  | 0.18 |
| Hybrids | NKXS01008898.1 | 4535  | 0.18 |
| Hybrids | NKXS01008914.1 | 940   | 0.18 |
| Hybrids | NKXS01008955.1 | 13410 | 0.18 |
| Hybrids | NKXS01008955.1 | 13754 | 0.18 |
| Hybrids | NKXS01008985.1 | 10007 | 0.18 |
| Hybrids | NKXS01008985.1 | 9942  | 0.18 |
| Hybrids | NKXS01008985.1 | 9946  | 0.18 |
| Hybrids | NKXS01008985.1 | 9948  | 0.18 |
| Hybrids | NKXS01009120.1 | 6935  | 0.18 |
| Hybrids | NKXS01009120.1 | 7026  | 0.18 |
| Hybrids | NKXS01009120.1 | 7037  | 0.18 |
| Hybrids | NKXS01009173.1 | 15565 | 0.18 |
| Hybrids | NKXS01009188.1 | 8790  | 0.18 |
| Hybrids | NKXS01009188.1 | 8805  | 0.18 |
| Hybrids | NKXS01009188.1 | 8808  | 0.18 |
| Hybrids | NKXS01009188.1 | 8847  | 0.18 |
| Hybrids | NKXS01009188.1 | 9046  | 0.18 |
| Hybrids | NKXS01009193.1 | 926   | 0.18 |
| Hybrids | NKXS01009215.1 | 11764 | 0.18 |
| Hybrids | NKXS01009215.1 | 11830 | 0.18 |
| Hybrids | NKXS01009215.1 | 11833 | 0.18 |
| Hybrids | NKXS01009399.1 | 7475  | 0.18 |
| Hybrids | NKXS01009493.1 | 5059  | 0.18 |
| Hybrids | NKXS01009493.1 | 5064  | 0.18 |
| Hybrids | NKXS01009604.1 | 5393  | 0.18 |
| Hybrids | NKXS01009604.1 | 5415  | 0.18 |
| Hybrids | NKXS01009604.1 | 5493  | 0.18 |
| Hybrids | NKXS01009604.1 | 5552  | 0.18 |
| Hybrids | NKXS01009688.1 | 1170  | 0.18 |
| Hybrids | NKXS01009959.1 | 2963  | 0.18 |
| Hybrids | NKXS01010170.1 | 1260  | 0.18 |
| Hybrids | NKXS01010170.1 | 1371  | 0.18 |
| Hybrids | NKXS01010170.1 | 1372  | 0.18 |
| Hybrids | NKXS01010170.1 | 1388  | 0.18 |
| Hybrids | NKXS01010170.1 | 1425  | 0.18 |
| Hybrids | NKXS01010285.1 | 100   | 0.18 |
| Hybrids | NKXS01010296.1 | 2163  | 0.18 |
| Hybrids | NKXS01010411.1 | 4190  | 0.18 |
| Hybrids | NKXS01010569.1 | 4750  | 0.18 |
| Hybrids | NKXS01010569.1 | 4799  | 0.18 |
| Hybrids | NKXS01011684.1 | 332   | 0.18 |
| Hybrids | NKXS01012054.1 | 400   | 0.18 |
| Hybrids | NKXS01012469.1 | 1105  | 0.18 |

|         |                |        |      |
|---------|----------------|--------|------|
| Hybrids | NKXS01012469.1 | 368    | 0.18 |
| Hybrids | NKXS01012469.1 | 427    | 0.18 |
| Hybrids | NKXS01012469.1 | 429    | 0.18 |
| Hybrids | NKXS01012469.1 | 492    | 0.18 |
| Hybrids | NKXS01000015.1 | 30584  | 0.09 |
| Hybrids | NKXS01000015.1 | 30614  | 0.09 |
| Hybrids | NKXS01000015.1 | 30751  | 0.09 |
| Hybrids | NKXS01000015.1 | 30795  | 0.09 |
| Hybrids | NKXS01000017.1 | 89998  | 0.09 |
| Hybrids | NKXS01000021.1 | 211211 | 0.09 |
| Hybrids | NKXS01000023.1 | 461544 | 0.09 |
| Hybrids | NKXS01000075.1 | 46491  | 0.09 |
| Hybrids | NKXS01000075.1 | 48614  | 0.09 |
| Hybrids | NKXS01000087.1 | 14605  | 0.09 |
| Hybrids | NKXS01000087.1 | 14702  | 0.09 |
| Hybrids | NKXS01000094.1 | 184648 | 0.09 |
| Hybrids | NKXS01000094.1 | 184678 | 0.09 |
| Hybrids | NKXS01000094.1 | 184693 | 0.09 |
| Hybrids | NKXS01000094.1 | 184729 | 0.09 |
| Hybrids | NKXS01000097.1 | 29512  | 0.09 |
| Hybrids | NKXS01000114.1 | 115587 | 0.09 |
| Hybrids | NKXS01000118.1 | 57214  | 0.09 |
| Hybrids | NKXS01000118.1 | 57336  | 0.09 |
| Hybrids | NKXS01000135.1 | 56132  | 0.09 |
| Hybrids | NKXS01000138.1 | 18198  | 0.09 |
| Hybrids | NKXS01000138.1 | 18219  | 0.09 |
| Hybrids | NKXS01000138.1 | 18237  | 0.09 |
| Hybrids | NKXS01000138.1 | 18297  | 0.09 |
| Hybrids | NKXS01000138.1 | 18339  | 0.09 |
| Hybrids | NKXS01000138.1 | 18379  | 0.09 |
| Hybrids | NKXS01000145.1 | 103830 | 0.09 |
| Hybrids | NKXS01000151.1 | 49433  | 0.09 |
| Hybrids | NKXS01000157.1 | 168349 | 0.09 |
| Hybrids | NKXS01000159.1 | 20226  | 0.09 |
| Hybrids | NKXS01000167.1 | 198789 | 0.09 |
| Hybrids | NKXS01000167.1 | 198793 | 0.09 |
| Hybrids | NKXS01000167.1 | 198821 | 0.09 |
| Hybrids | NKXS01000174.1 | 5160   | 0.09 |
| Hybrids | NKXS01000186.1 | 284951 | 0.09 |
| Hybrids | NKXS01000186.1 | 284981 | 0.09 |
| Hybrids | NKXS01000186.1 | 73143  | 0.09 |
| Hybrids | NKXS01000189.1 | 60550  | 0.09 |
| Hybrids | NKXS01000189.1 | 60766  | 0.09 |
| Hybrids | NKXS01000198.1 | 48133  | 0.09 |

|         |                |        |      |
|---------|----------------|--------|------|
| Hybrids | NKXS01000198.1 | 48331  | 0.09 |
| Hybrids | NKXS01000218.1 | 210155 | 0.09 |
| Hybrids | NKXS01000218.1 | 210404 | 0.09 |
| Hybrids | NKXS01000241.1 | 186116 | 0.09 |
| Hybrids | NKXS01000241.1 | 186129 | 0.09 |
| Hybrids | NKXS01000241.1 | 186134 | 0.09 |
| Hybrids | NKXS01000241.1 | 186161 | 0.09 |
| Hybrids | NKXS01000243.1 | 87538  | 0.09 |
| Hybrids | NKXS01000253.1 | 99158  | 0.09 |
| Hybrids | NKXS01000278.1 | 104563 | 0.09 |
| Hybrids | NKXS01000278.1 | 38515  | 0.09 |
| Hybrids | NKXS01000278.1 | 65008  | 0.09 |
| Hybrids | NKXS01000278.1 | 65170  | 0.09 |
| Hybrids | NKXS01000287.1 | 146625 | 0.09 |
| Hybrids | NKXS01000288.1 | 125014 | 0.09 |
| Hybrids | NKXS01000288.1 | 125110 | 0.09 |
| Hybrids | NKXS01000298.1 | 171580 | 0.09 |
| Hybrids | NKXS01000298.1 | 171646 | 0.09 |
| Hybrids | NKXS01000298.1 | 171768 | 0.09 |
| Hybrids | NKXS01000298.1 | 171777 | 0.09 |
| Hybrids | NKXS01000303.1 | 2549   | 0.09 |
| Hybrids | NKXS01000308.1 | 1193   | 0.09 |
| Hybrids | NKXS01000308.1 | 1199   | 0.09 |
| Hybrids | NKXS01000315.1 | 50712  | 0.09 |
| Hybrids | NKXS01000315.1 | 50888  | 0.09 |
| Hybrids | NKXS01000316.1 | 15512  | 0.09 |
| Hybrids | NKXS01000321.1 | 131920 | 0.09 |
| Hybrids | NKXS01000322.1 | 29612  | 0.09 |
| Hybrids | NKXS01000322.1 | 29667  | 0.09 |
| Hybrids | NKXS01000331.1 | 57098  | 0.09 |
| Hybrids | NKXS01000344.1 | 149133 | 0.09 |
| Hybrids | NKXS01000344.1 | 149145 | 0.09 |
| Hybrids | NKXS01000347.1 | 5110   | 0.09 |
| Hybrids | NKXS01000347.1 | 5213   | 0.09 |
| Hybrids | NKXS01000353.1 | 11208  | 0.09 |
| Hybrids | NKXS01000353.1 | 159146 | 0.09 |
| Hybrids | NKXS01000364.1 | 110991 | 0.09 |
| Hybrids | NKXS01000382.1 | 194201 | 0.09 |
| Hybrids | NKXS01000382.1 | 194218 | 0.09 |
| Hybrids | NKXS01000383.1 | 100677 | 0.09 |
| Hybrids | NKXS01000394.1 | 2690   | 0.09 |
| Hybrids | NKXS01000410.1 | 47257  | 0.09 |
| Hybrids | NKXS01000410.1 | 47268  | 0.09 |
| Hybrids | NKXS01000410.1 | 47315  | 0.09 |

|         |                |        |      |
|---------|----------------|--------|------|
| Hybrids | NKXS01000410.1 | 47327  | 0.09 |
| Hybrids | NKXS01000415.1 | 133552 | 0.09 |
| Hybrids | NKXS01000415.1 | 85339  | 0.09 |
| Hybrids | NKXS01000415.1 | 85449  | 0.09 |
| Hybrids | NKXS01000415.1 | 85522  | 0.09 |
| Hybrids | NKXS01000415.1 | 85525  | 0.09 |
| Hybrids | NKXS01000415.1 | 85546  | 0.09 |
| Hybrids | NKXS01000421.1 | 120912 | 0.09 |
| Hybrids | NKXS01000421.1 | 154119 | 0.09 |
| Hybrids | NKXS01000450.1 | 15206  | 0.09 |
| Hybrids | NKXS01000450.1 | 15347  | 0.09 |
| Hybrids | NKXS01000455.1 | 123705 | 0.09 |
| Hybrids | NKXS01000455.1 | 123775 | 0.09 |
| Hybrids | NKXS01000455.1 | 123794 | 0.09 |
| Hybrids | NKXS01000464.1 | 21592  | 0.09 |
| Hybrids | NKXS01000468.1 | 10512  | 0.09 |
| Hybrids | NKXS01000485.1 | 35794  | 0.09 |
| Hybrids | NKXS01000487.1 | 107166 | 0.09 |
| Hybrids | NKXS01000511.1 | 419    | 0.09 |
| Hybrids | NKXS01000515.1 | 150305 | 0.09 |
| Hybrids | NKXS01000517.1 | 130166 | 0.09 |
| Hybrids | NKXS01000520.1 | 88695  | 0.09 |
| Hybrids | NKXS01000524.1 | 57750  | 0.09 |
| Hybrids | NKXS01000546.1 | 25084  | 0.09 |
| Hybrids | NKXS01000546.1 | 25150  | 0.09 |
| Hybrids | NKXS01000546.1 | 25201  | 0.09 |
| Hybrids | NKXS01000559.1 | 23762  | 0.09 |
| Hybrids | NKXS01000570.1 | 135671 | 0.09 |
| Hybrids | NKXS01000570.1 | 135761 | 0.09 |
| Hybrids | NKXS01000570.1 | 135795 | 0.09 |
| Hybrids | NKXS01000570.1 | 135834 | 0.09 |
| Hybrids | NKXS01000585.1 | 257108 | 0.09 |
| Hybrids | NKXS01000593.1 | 16182  | 0.09 |
| Hybrids | NKXS01000593.1 | 16206  | 0.09 |
| Hybrids | NKXS01000593.1 | 16250  | 0.09 |
| Hybrids | NKXS01000600.1 | 294906 | 0.09 |
| Hybrids | NKXS01000610.1 | 45214  | 0.09 |
| Hybrids | NKXS01000633.1 | 56169  | 0.09 |
| Hybrids | NKXS01000633.1 | 56171  | 0.09 |
| Hybrids | NKXS01000640.1 | 9294   | 0.09 |
| Hybrids | NKXS01000640.1 | 9300   | 0.09 |
| Hybrids | NKXS01000640.1 | 9324   | 0.09 |
| Hybrids | NKXS01000640.1 | 9392   | 0.09 |
| Hybrids | NKXS01000640.1 | 9499   | 0.09 |



|         |                |        |      |
|---------|----------------|--------|------|
| Hybrids | NKXS01000654.1 | 39198  | 0.09 |
| Hybrids | NKXS01000654.1 | 39422  | 0.09 |
| Hybrids | NKXS01000655.1 | 56637  | 0.09 |
| Hybrids | NKXS01000662.1 | 95744  | 0.09 |
| Hybrids | NKXS01000672.1 | 10111  | 0.09 |
| Hybrids | NKXS01000676.1 | 9028   | 0.09 |
| Hybrids | NKXS01000686.1 | 16902  | 0.09 |
| Hybrids | NKXS01000697.1 | 42883  | 0.09 |
| Hybrids | NKXS01000703.1 | 44078  | 0.09 |
| Hybrids | NKXS01000704.1 | 47253  | 0.09 |
| Hybrids | NKXS01000711.1 | 113514 | 0.09 |
| Hybrids | NKXS01000733.1 | 6943   | 0.09 |
| Hybrids | NKXS01000733.1 | 91060  | 0.09 |
| Hybrids | NKXS01000733.1 | 91130  | 0.09 |
| Hybrids | NKXS01000770.1 | 6764   | 0.09 |
| Hybrids | NKXS01000793.1 | 24257  | 0.09 |
| Hybrids | NKXS01000816.1 | 65458  | 0.09 |
| Hybrids | NKXS01000820.1 | 104897 | 0.09 |
| Hybrids | NKXS01000822.1 | 1548   | 0.09 |
| Hybrids | NKXS01000824.1 | 22836  | 0.09 |
| Hybrids | NKXS01000824.1 | 23002  | 0.09 |
| Hybrids | NKXS01000824.1 | 23004  | 0.09 |
| Hybrids | NKXS01000835.1 | 2918   | 0.09 |
| Hybrids | NKXS01000835.1 | 2940   | 0.09 |
| Hybrids | NKXS01000835.1 | 3092   | 0.09 |
| Hybrids | NKXS01000835.1 | 3113   | 0.09 |
| Hybrids | NKXS01000845.1 | 79041  | 0.09 |
| Hybrids | NKXS01000852.1 | 102504 | 0.09 |
| Hybrids | NKXS01000852.1 | 102520 | 0.09 |
| Hybrids | NKXS01000852.1 | 102536 | 0.09 |
| Hybrids | NKXS01000852.1 | 102582 | 0.09 |
| Hybrids | NKXS01000852.1 | 102609 | 0.09 |
| Hybrids | NKXS01000852.1 | 102684 | 0.09 |
| Hybrids | NKXS01000852.1 | 102702 | 0.09 |
| Hybrids | NKXS01000852.1 | 107230 | 0.09 |
| Hybrids | NKXS01000852.1 | 107268 | 0.09 |
| Hybrids | NKXS01000852.1 | 107350 | 0.09 |
| Hybrids | NKXS01000852.1 | 110350 | 0.09 |
| Hybrids | NKXS01000852.1 | 119063 | 0.09 |
| Hybrids | NKXS01000852.1 | 119077 | 0.09 |
| Hybrids | NKXS01000852.1 | 119103 | 0.09 |
| Hybrids | NKXS01000867.1 | 95817  | 0.09 |
| Hybrids | NKXS01000867.1 | 95825  | 0.09 |
| Hybrids | NKXS01000877.1 | 94024  | 0.09 |

|         |                |        |      |
|---------|----------------|--------|------|
| Hybrids | NKXS01000882.1 | 112839 | 0.09 |
| Hybrids | NKXS01000882.1 | 113124 | 0.09 |
| Hybrids | NKXS01000890.1 | 134144 | 0.09 |
| Hybrids | NKXS01000891.1 | 36026  | 0.09 |
| Hybrids | NKXS01000891.1 | 36144  | 0.09 |
| Hybrids | NKXS01000891.1 | 36231  | 0.09 |
| Hybrids | NKXS01000892.1 | 25466  | 0.09 |
| Hybrids | NKXS01000892.1 | 72723  | 0.09 |
| Hybrids | NKXS01000893.1 | 75795  | 0.09 |
| Hybrids | NKXS01000893.1 | 75800  | 0.09 |
| Hybrids | NKXS01000931.1 | 113507 | 0.09 |
| Hybrids | NKXS01000931.1 | 113548 | 0.09 |
| Hybrids | NKXS01000936.1 | 76681  | 0.09 |
| Hybrids | NKXS01000936.1 | 76876  | 0.09 |
| Hybrids | NKXS01000959.1 | 41865  | 0.09 |
| Hybrids | NKXS01000959.1 | 42304  | 0.09 |
| Hybrids | NKXS01000959.1 | 42312  | 0.09 |
| Hybrids | NKXS01000959.1 | 42389  | 0.09 |
| Hybrids | NKXS01000965.1 | 113928 | 0.09 |
| Hybrids | NKXS01000980.1 | 27738  | 0.09 |
| Hybrids | NKXS01000980.1 | 27770  | 0.09 |
| Hybrids | NKXS01000992.1 | 43098  | 0.09 |
| Hybrids | NKXS01001002.1 | 94890  | 0.09 |
| Hybrids | NKXS01001002.1 | 94982  | 0.09 |
| Hybrids | NKXS01001008.1 | 58601  | 0.09 |
| Hybrids | NKXS01001041.1 | 8540   | 0.09 |
| Hybrids | NKXS01001041.1 | 8702   | 0.09 |
| Hybrids | NKXS01001041.1 | 8741   | 0.09 |
| Hybrids | NKXS01001052.1 | 133168 | 0.09 |
| Hybrids | NKXS01001059.1 | 139855 | 0.09 |
| Hybrids | NKXS01001062.1 | 123123 | 0.09 |
| Hybrids | NKXS01001078.1 | 10831  | 0.09 |
| Hybrids | NKXS01001087.1 | 108091 | 0.09 |
| Hybrids | NKXS01001100.1 | 7044   | 0.09 |
| Hybrids | NKXS01001100.1 | 7226   | 0.09 |
| Hybrids | NKXS01001112.1 | 35168  | 0.09 |
| Hybrids | NKXS01001122.1 | 185918 | 0.09 |
| Hybrids | NKXS01001127.1 | 45742  | 0.09 |
| Hybrids | NKXS01001127.1 | 45866  | 0.09 |
| Hybrids | NKXS01001129.1 | 107742 | 0.09 |
| Hybrids | NKXS01001129.1 | 107752 | 0.09 |
| Hybrids | NKXS01001129.1 | 107784 | 0.09 |
| Hybrids | NKXS01001129.1 | 107899 | 0.09 |
| Hybrids | NKXS01001132.1 | 78809  | 0.09 |

|         |                |        |      |
|---------|----------------|--------|------|
| Hybrids | NKXS01001132.1 | 83959  | 0.09 |
| Hybrids | NKXS01001134.1 | 14437  | 0.09 |
| Hybrids | NKXS01001134.1 | 14521  | 0.09 |
| Hybrids | NKXS01001134.1 | 9669   | 0.09 |
| Hybrids | NKXS01001137.1 | 1377   | 0.09 |
| Hybrids | NKXS01001144.1 | 2832   | 0.09 |
| Hybrids | NKXS01001164.1 | 31809  | 0.09 |
| Hybrids | NKXS01001170.1 | 1186   | 0.09 |
| Hybrids | NKXS01001189.1 | 226293 | 0.09 |
| Hybrids | NKXS01001189.1 | 226333 | 0.09 |
| Hybrids | NKXS01001197.1 | 3522   | 0.09 |
| Hybrids | NKXS01001197.1 | 3631   | 0.09 |
| Hybrids | NKXS01001211.1 | 65639  | 0.09 |
| Hybrids | NKXS01001211.1 | 65687  | 0.09 |
| Hybrids | NKXS01001212.1 | 14321  | 0.09 |
| Hybrids | NKXS01001245.1 | 45051  | 0.09 |
| Hybrids | NKXS01001245.1 | 45137  | 0.09 |
| Hybrids | NKXS01001265.1 | 125846 | 0.09 |
| Hybrids | NKXS01001265.1 | 125991 | 0.09 |
| Hybrids | NKXS01001275.1 | 74804  | 0.09 |
| Hybrids | NKXS01001283.1 | 48747  | 0.09 |
| Hybrids | NKXS01001288.1 | 25977  | 0.09 |
| Hybrids | NKXS01001288.1 | 26007  | 0.09 |
| Hybrids | NKXS01001288.1 | 26115  | 0.09 |
| Hybrids | NKXS01001328.1 | 60493  | 0.09 |
| Hybrids | NKXS01001328.1 | 60631  | 0.09 |
| Hybrids | NKXS01001366.1 | 34000  | 0.09 |
| Hybrids | NKXS01001366.1 | 34073  | 0.09 |
| Hybrids | NKXS01001366.1 | 37939  | 0.09 |
| Hybrids | NKXS01001377.1 | 40173  | 0.09 |
| Hybrids | NKXS01001377.1 | 40307  | 0.09 |
| Hybrids | NKXS01001387.1 | 16392  | 0.09 |
| Hybrids | NKXS01001387.1 | 92990  | 0.09 |
| Hybrids | NKXS01001387.1 | 93133  | 0.09 |
| Hybrids | NKXS01001396.1 | 139125 | 0.09 |
| Hybrids | NKXS01001396.1 | 139196 | 0.09 |
| Hybrids | NKXS01001408.1 | 28031  | 0.09 |
| Hybrids | NKXS01001421.1 | 22160  | 0.09 |
| Hybrids | NKXS01001421.1 | 57185  | 0.09 |
| Hybrids | NKXS01001435.1 | 40091  | 0.09 |
| Hybrids | NKXS01001435.1 | 40292  | 0.09 |
| Hybrids | NKXS01001440.1 | 146025 | 0.09 |
| Hybrids | NKXS01001442.1 | 40155  | 0.09 |
| Hybrids | NKXS01001442.1 | 40255  | 0.09 |

|         |                |        |      |
|---------|----------------|--------|------|
| Hybrids | NKXS01001448.1 | 83902  | 0.09 |
| Hybrids | NKXS01001448.1 | 83971  | 0.09 |
| Hybrids | NKXS01001448.1 | 84037  | 0.09 |
| Hybrids | NKXS01001449.1 | 65978  | 0.09 |
| Hybrids | NKXS01001449.1 | 65990  | 0.09 |
| Hybrids | NKXS01001449.1 | 66017  | 0.09 |
| Hybrids | NKXS01001453.1 | 1146   | 0.09 |
| Hybrids | NKXS01001477.1 | 82590  | 0.09 |
| Hybrids | NKXS01001477.1 | 82618  | 0.09 |
| Hybrids | NKXS01001483.1 | 30397  | 0.09 |
| Hybrids | NKXS01001494.1 | 52538  | 0.09 |
| Hybrids | NKXS01001495.1 | 78892  | 0.09 |
| Hybrids | NKXS01001501.1 | 9190   | 0.09 |
| Hybrids | NKXS01001530.1 | 36972  | 0.09 |
| Hybrids | NKXS01001534.1 | 11129  | 0.09 |
| Hybrids | NKXS01001534.1 | 11160  | 0.09 |
| Hybrids | NKXS01001534.1 | 11319  | 0.09 |
| Hybrids | NKXS01001534.1 | 11363  | 0.09 |
| Hybrids | NKXS01001584.1 | 101154 | 0.09 |
| Hybrids | NKXS01001584.1 | 70170  | 0.09 |
| Hybrids | NKXS01001597.1 | 30624  | 0.09 |
| Hybrids | NKXS01001597.1 | 30753  | 0.09 |
| Hybrids | NKXS01001610.1 | 88020  | 0.09 |
| Hybrids | NKXS01001626.1 | 52335  | 0.09 |
| Hybrids | NKXS01001647.1 | 79021  | 0.09 |
| Hybrids | NKXS01001663.1 | 31223  | 0.09 |
| Hybrids | NKXS01001680.1 | 9996   | 0.09 |
| Hybrids | NKXS01001697.1 | 95291  | 0.09 |
| Hybrids | NKXS01001701.1 | 62433  | 0.09 |
| Hybrids | NKXS01001701.1 | 62497  | 0.09 |
| Hybrids | NKXS01001710.1 | 67099  | 0.09 |
| Hybrids | NKXS01001744.1 | 121777 | 0.09 |
| Hybrids | NKXS01001773.1 | 48226  | 0.09 |
| Hybrids | NKXS01001777.1 | 28627  | 0.09 |
| Hybrids | NKXS01001777.1 | 28793  | 0.09 |
| Hybrids | NKXS01001777.1 | 28799  | 0.09 |
| Hybrids | NKXS01001777.1 | 8459   | 0.09 |
| Hybrids | NKXS01001793.1 | 3870   | 0.09 |
| Hybrids | NKXS01001793.1 | 3878   | 0.09 |
| Hybrids | NKXS01001793.1 | 4584   | 0.09 |
| Hybrids | NKXS01001796.1 | 98148  | 0.09 |
| Hybrids | NKXS01001796.1 | 98156  | 0.09 |
| Hybrids | NKXS01001796.1 | 98369  | 0.09 |
| Hybrids | NKXS01001811.1 | 1654   | 0.09 |

|         |                |        |      |
|---------|----------------|--------|------|
| Hybrids | NKXS01001812.1 | 55717  | 0.09 |
| Hybrids | NKXS01001815.1 | 106643 | 0.09 |
| Hybrids | NKXS01001818.1 | 14202  | 0.09 |
| Hybrids | NKXS01001828.1 | 62129  | 0.09 |
| Hybrids | NKXS01001875.1 | 34414  | 0.09 |
| Hybrids | NKXS01001875.1 | 34595  | 0.09 |
| Hybrids | NKXS01001892.1 | 2355   | 0.09 |
| Hybrids | NKXS01001892.1 | 2377   | 0.09 |
| Hybrids | NKXS01001892.1 | 2390   | 0.09 |
| Hybrids | NKXS01001892.1 | 660    | 0.09 |
| Hybrids | NKXS01001924.1 | 104997 | 0.09 |
| Hybrids | NKXS01001924.1 | 105070 | 0.09 |
| Hybrids | NKXS01001924.1 | 105086 | 0.09 |
| Hybrids | NKXS01001924.1 | 105181 | 0.09 |
| Hybrids | NKXS01001924.1 | 105206 | 0.09 |
| Hybrids | NKXS01001957.1 | 8456   | 0.09 |
| Hybrids | NKXS01001972.1 | 100390 | 0.09 |
| Hybrids | NKXS01001972.1 | 59265  | 0.09 |
| Hybrids | NKXS01001972.1 | 77541  | 0.09 |
| Hybrids | NKXS01001987.1 | 141122 | 0.09 |
| Hybrids | NKXS01001991.1 | 5169   | 0.09 |
| Hybrids | NKXS01001995.1 | 47312  | 0.09 |
| Hybrids | NKXS01001995.1 | 47408  | 0.09 |
| Hybrids | NKXS01001996.1 | 61098  | 0.09 |
| Hybrids | NKXS01001996.1 | 61263  | 0.09 |
| Hybrids | NKXS01002052.1 | 57026  | 0.09 |
| Hybrids | NKXS01002108.1 | 3668   | 0.09 |
| Hybrids | NKXS01002108.1 | 3861   | 0.09 |
| Hybrids | NKXS01002133.1 | 33239  | 0.09 |
| Hybrids | NKXS01002148.1 | 56950  | 0.09 |
| Hybrids | NKXS01002148.1 | 56970  | 0.09 |
| Hybrids | NKXS01002148.1 | 56995  | 0.09 |
| Hybrids | NKXS01002148.1 | 57006  | 0.09 |
| Hybrids | NKXS01002148.1 | 57162  | 0.09 |
| Hybrids | NKXS01002161.1 | 30587  | 0.09 |
| Hybrids | NKXS01002161.1 | 30639  | 0.09 |
| Hybrids | NKXS01002171.1 | 33950  | 0.09 |
| Hybrids | NKXS01002182.1 | 1920   | 0.09 |
| Hybrids | NKXS01002184.1 | 93851  | 0.09 |
| Hybrids | NKXS01002190.1 | 44371  | 0.09 |
| Hybrids | NKXS01002193.1 | 32112  | 0.09 |
| Hybrids | NKXS01002196.1 | 36997  | 0.09 |
| Hybrids | NKXS01002196.1 | 37023  | 0.09 |
| Hybrids | NKXS01002228.1 | 87458  | 0.09 |

|         |                |        |      |
|---------|----------------|--------|------|
| Hybrids | NKXS01002237.1 | 11708  | 0.09 |
| Hybrids | NKXS01002251.1 | 4951   | 0.09 |
| Hybrids | NKXS01002330.1 | 66777  | 0.09 |
| Hybrids | NKXS01002330.1 | 66951  | 0.09 |
| Hybrids | NKXS01002337.1 | 77943  | 0.09 |
| Hybrids | NKXS01002343.1 | 2363   | 0.09 |
| Hybrids | NKXS01002344.1 | 83674  | 0.09 |
| Hybrids | NKXS01002344.1 | 83748  | 0.09 |
| Hybrids | NKXS01002345.1 | 48018  | 0.09 |
| Hybrids | NKXS01002345.1 | 48140  | 0.09 |
| Hybrids | NKXS01002364.1 | 10402  | 0.09 |
| Hybrids | NKXS01002396.1 | 10340  | 0.09 |
| Hybrids | NKXS01002403.1 | 18126  | 0.09 |
| Hybrids | NKXS01002411.1 | 90658  | 0.09 |
| Hybrids | NKXS01002411.1 | 90700  | 0.09 |
| Hybrids | NKXS01002417.1 | 97614  | 0.09 |
| Hybrids | NKXS01002417.1 | 97635  | 0.09 |
| Hybrids | NKXS01002417.1 | 97667  | 0.09 |
| Hybrids | NKXS01002417.1 | 97679  | 0.09 |
| Hybrids | NKXS01002420.1 | 45221  | 0.09 |
| Hybrids | NKXS01002420.1 | 45258  | 0.09 |
| Hybrids | NKXS01002464.1 | 24305  | 0.09 |
| Hybrids | NKXS01002464.1 | 24363  | 0.09 |
| Hybrids | NKXS01002464.1 | 24411  | 0.09 |
| Hybrids | NKXS01002470.1 | 34945  | 0.09 |
| Hybrids | NKXS01002470.1 | 39940  | 0.09 |
| Hybrids | NKXS01002490.1 | 58133  | 0.09 |
| Hybrids | NKXS01002491.1 | 116876 | 0.09 |
| Hybrids | NKXS01002491.1 | 116966 | 0.09 |
| Hybrids | NKXS01002491.1 | 116992 | 0.09 |
| Hybrids | NKXS01002491.1 | 117024 | 0.09 |
| Hybrids | NKXS01002491.1 | 117060 | 0.09 |
| Hybrids | NKXS01002500.1 | 62532  | 0.09 |
| Hybrids | NKXS01002511.1 | 22625  | 0.09 |
| Hybrids | NKXS01002566.1 | 76297  | 0.09 |
| Hybrids | NKXS01002570.1 | 59268  | 0.09 |
| Hybrids | NKXS01002570.1 | 59337  | 0.09 |
| Hybrids | NKXS01002577.1 | 216    | 0.09 |
| Hybrids | NKXS01002577.1 | 256    | 0.09 |
| Hybrids | NKXS01002577.1 | 413    | 0.09 |
| Hybrids | NKXS01002578.1 | 14483  | 0.09 |
| Hybrids | NKXS01002600.1 | 85741  | 0.09 |
| Hybrids | NKXS01002606.1 | 85004  | 0.09 |
| Hybrids | NKXS01002622.1 | 48472  | 0.09 |

|         |                |        |      |
|---------|----------------|--------|------|
| Hybrids | NKXS01002623.1 | 13480  | 0.09 |
| Hybrids | NKXS01002623.1 | 13535  | 0.09 |
| Hybrids | NKXS01002623.1 | 13538  | 0.09 |
| Hybrids | NKXS01002625.1 | 65994  | 0.09 |
| Hybrids | NKXS01002626.1 | 54391  | 0.09 |
| Hybrids | NKXS01002646.1 | 40911  | 0.09 |
| Hybrids | NKXS01002646.1 | 40955  | 0.09 |
| Hybrids | NKXS01002646.1 | 40958  | 0.09 |
| Hybrids | NKXS01002646.1 | 40967  | 0.09 |
| Hybrids | NKXS01002651.1 | 24178  | 0.09 |
| Hybrids | NKXS01002653.1 | 87891  | 0.09 |
| Hybrids | NKXS01002653.1 | 88025  | 0.09 |
| Hybrids | NKXS01002653.1 | 88031  | 0.09 |
| Hybrids | NKXS01002653.1 | 88037  | 0.09 |
| Hybrids | NKXS01002661.1 | 73321  | 0.09 |
| Hybrids | NKXS01002675.1 | 67213  | 0.09 |
| Hybrids | NKXS01002684.1 | 19511  | 0.09 |
| Hybrids | NKXS01002684.1 | 19669  | 0.09 |
| Hybrids | NKXS01002684.1 | 19694  | 0.09 |
| Hybrids | NKXS01002684.1 | 2898   | 0.09 |
| Hybrids | NKXS01002684.1 | 3017   | 0.09 |
| Hybrids | NKXS01002703.1 | 85469  | 0.09 |
| Hybrids | NKXS01002705.1 | 210475 | 0.09 |
| Hybrids | NKXS01002706.1 | 53064  | 0.09 |
| Hybrids | NKXS01002706.1 | 67720  | 0.09 |
| Hybrids | NKXS01002730.1 | 26459  | 0.09 |
| Hybrids | NKXS01002730.1 | 26564  | 0.09 |
| Hybrids | NKXS01002730.1 | 26602  | 0.09 |
| Hybrids | NKXS01002730.1 | 50387  | 0.09 |
| Hybrids | NKXS01002742.1 | 407    | 0.09 |
| Hybrids | NKXS01002742.1 | 426    | 0.09 |
| Hybrids | NKXS01002742.1 | 432    | 0.09 |
| Hybrids | NKXS01002742.1 | 435    | 0.09 |
| Hybrids | NKXS01002742.1 | 547    | 0.09 |
| Hybrids | NKXS01002745.1 | 33564  | 0.09 |
| Hybrids | NKXS01002758.1 | 12753  | 0.09 |
| Hybrids | NKXS01002758.1 | 12788  | 0.09 |
| Hybrids | NKXS01002817.1 | 27448  | 0.09 |
| Hybrids | NKXS01002825.1 | 101645 | 0.09 |
| Hybrids | NKXS01002825.1 | 111919 | 0.09 |
| Hybrids | NKXS01002839.1 | 9345   | 0.09 |
| Hybrids | NKXS01002852.1 | 29143  | 0.09 |
| Hybrids | NKXS01002852.1 | 29197  | 0.09 |
| Hybrids | NKXS01002909.1 | 55904  | 0.09 |

|         |                |       |      |
|---------|----------------|-------|------|
| Hybrids | NKXS01002944.1 | 1296  | 0.09 |
| Hybrids | NKXS01002944.1 | 1310  | 0.09 |
| Hybrids | NKXS01002944.1 | 1366  | 0.09 |
| Hybrids | NKXS01002944.1 | 1370  | 0.09 |
| Hybrids | NKXS01002947.1 | 51562 | 0.09 |
| Hybrids | NKXS01002947.1 | 51599 | 0.09 |
| Hybrids | NKXS01002947.1 | 51600 | 0.09 |
| Hybrids | NKXS01002947.1 | 51720 | 0.09 |
| Hybrids | NKXS01002958.1 | 70253 | 0.09 |
| Hybrids | NKXS01002999.1 | 83239 | 0.09 |
| Hybrids | NKXS01003010.1 | 9279  | 0.09 |
| Hybrids | NKXS01003010.1 | 9443  | 0.09 |
| Hybrids | NKXS01003013.1 | 48955 | 0.09 |
| Hybrids | NKXS01003013.1 | 48965 | 0.09 |
| Hybrids | NKXS01003043.1 | 74725 | 0.09 |
| Hybrids | NKXS01003045.1 | 23212 | 0.09 |
| Hybrids | NKXS01003056.1 | 67318 | 0.09 |
| Hybrids | NKXS01003073.1 | 65182 | 0.09 |
| Hybrids | NKXS01003073.1 | 96503 | 0.09 |
| Hybrids | NKXS01003091.1 | 9559  | 0.09 |
| Hybrids | NKXS01003111.1 | 2487  | 0.09 |
| Hybrids | NKXS01003111.1 | 2580  | 0.09 |
| Hybrids | NKXS01003113.1 | 32985 | 0.09 |
| Hybrids | NKXS01003113.1 | 33108 | 0.09 |
| Hybrids | NKXS01003134.1 | 70960 | 0.09 |
| Hybrids | NKXS01003134.1 | 70999 | 0.09 |
| Hybrids | NKXS01003134.1 | 71007 | 0.09 |
| Hybrids | NKXS01003139.1 | 29143 | 0.09 |
| Hybrids | NKXS01003169.1 | 5580  | 0.09 |
| Hybrids | NKXS01003169.1 | 5709  | 0.09 |
| Hybrids | NKXS01003216.1 | 30728 | 0.09 |
| Hybrids | NKXS01003221.1 | 48094 | 0.09 |
| Hybrids | NKXS01003221.1 | 48105 | 0.09 |
| Hybrids | NKXS01003221.1 | 48233 | 0.09 |
| Hybrids | NKXS01003260.1 | 11288 | 0.09 |
| Hybrids | NKXS01003260.1 | 11305 | 0.09 |
| Hybrids | NKXS01003262.1 | 19796 | 0.09 |
| Hybrids | NKXS01003268.1 | 2329  | 0.09 |
| Hybrids | NKXS01003268.1 | 2330  | 0.09 |
| Hybrids | NKXS01003269.1 | 69707 | 0.09 |
| Hybrids | NKXS01003269.1 | 72735 | 0.09 |
| Hybrids | NKXS01003278.1 | 61942 | 0.09 |
| Hybrids | NKXS01003278.1 | 62005 | 0.09 |
| Hybrids | NKXS01003344.1 | 13186 | 0.09 |



|         |                |        |      |
|---------|----------------|--------|------|
| Hybrids | NKXS01003344.1 | 24407  | 0.09 |
| Hybrids | NKXS01003344.1 | 24458  | 0.09 |
| Hybrids | NKXS01003344.1 | 24475  | 0.09 |
| Hybrids | NKXS01003344.1 | 24489  | 0.09 |
| Hybrids | NKXS01003344.1 | 24517  | 0.09 |
| Hybrids | NKXS01003344.1 | 24626  | 0.09 |
| Hybrids | NKXS01003365.1 | 26551  | 0.09 |
| Hybrids | NKXS01003382.1 | 14903  | 0.09 |
| Hybrids | NKXS01003382.1 | 15023  | 0.09 |
| Hybrids | NKXS01003382.1 | 15129  | 0.09 |
| Hybrids | NKXS01003395.1 | 8830   | 0.09 |
| Hybrids | NKXS01003395.1 | 8847   | 0.09 |
| Hybrids | NKXS01003395.1 | 8986   | 0.09 |
| Hybrids | NKXS01003418.1 | 65321  | 0.09 |
| Hybrids | NKXS01003423.1 | 5584   | 0.09 |
| Hybrids | NKXS01003473.1 | 16812  | 0.09 |
| Hybrids | NKXS01003490.1 | 12687  | 0.09 |
| Hybrids | NKXS01003490.1 | 12803  | 0.09 |
| Hybrids | NKXS01003503.1 | 4334   | 0.09 |
| Hybrids | NKXS01003540.1 | 31952  | 0.09 |
| Hybrids | NKXS01003545.1 | 33570  | 0.09 |
| Hybrids | NKXS01003549.1 | 49496  | 0.09 |
| Hybrids | NKXS01003549.1 | 49544  | 0.09 |
| Hybrids | NKXS01003549.1 | 49647  | 0.09 |
| Hybrids | NKXS01003581.1 | 104750 | 0.09 |
| Hybrids | NKXS01003596.1 | 102611 | 0.09 |
| Hybrids | NKXS01003599.1 | 2528   | 0.09 |
| Hybrids | NKXS01003599.1 | 2669   | 0.09 |
| Hybrids | NKXS01003612.1 | 26807  | 0.09 |
| Hybrids | NKXS01003612.1 | 26853  | 0.09 |
| Hybrids | NKXS01003612.1 | 26895  | 0.09 |
| Hybrids | NKXS01003612.1 | 43839  | 0.09 |
| Hybrids | NKXS01003679.1 | 58120  | 0.09 |
| Hybrids | NKXS01003686.1 | 10087  | 0.09 |
| Hybrids | NKXS01003696.1 | 55394  | 0.09 |
| Hybrids | NKXS01003696.1 | 55544  | 0.09 |
| Hybrids | NKXS01003719.1 | 70868  | 0.09 |
| Hybrids | NKXS01003783.1 | 36168  | 0.09 |
| Hybrids | NKXS01003787.1 | 6048   | 0.09 |
| Hybrids | NKXS01003792.1 | 17830  | 0.09 |
| Hybrids | NKXS01003823.1 | 44826  | 0.09 |
| Hybrids | NKXS01003829.1 | 19980  | 0.09 |
| Hybrids | NKXS01003849.1 | 35989  | 0.09 |
| Hybrids | NKXS01003849.1 | 36122  | 0.09 |

|         |                |        |      |
|---------|----------------|--------|------|
| Hybrids | NKXS01003864.1 | 15798  | 0.09 |
| Hybrids | NKXS01003878.1 | 17113  | 0.09 |
| Hybrids | NKXS01003902.1 | 64954  | 0.09 |
| Hybrids | NKXS01003902.1 | 65055  | 0.09 |
| Hybrids | NKXS01003902.1 | 65101  | 0.09 |
| Hybrids | NKXS01003902.1 | 65103  | 0.09 |
| Hybrids | NKXS01003918.1 | 136525 | 0.09 |
| Hybrids | NKXS01003922.1 | 41381  | 0.09 |
| Hybrids | NKXS01003929.1 | 51142  | 0.09 |
| Hybrids | NKXS01003929.1 | 51241  | 0.09 |
| Hybrids | NKXS01003955.1 | 38832  | 0.09 |
| Hybrids | NKXS01003956.1 | 23933  | 0.09 |
| Hybrids | NKXS01003981.1 | 26654  | 0.09 |
| Hybrids | NKXS01003982.1 | 25971  | 0.09 |
| Hybrids | NKXS01003982.1 | 26202  | 0.09 |
| Hybrids | NKXS01003984.1 | 39481  | 0.09 |
| Hybrids | NKXS01004000.1 | 109885 | 0.09 |
| Hybrids | NKXS01004000.1 | 110018 | 0.09 |
| Hybrids | NKXS01004033.1 | 68803  | 0.09 |
| Hybrids | NKXS01004050.1 | 14052  | 0.09 |
| Hybrids | NKXS01004098.1 | 32330  | 0.09 |
| Hybrids | NKXS01004180.1 | 76390  | 0.09 |
| Hybrids | NKXS01004184.1 | 74664  | 0.09 |
| Hybrids | NKXS01004184.1 | 74703  | 0.09 |
| Hybrids | NKXS01004205.1 | 11341  | 0.09 |
| Hybrids | NKXS01004217.1 | 12964  | 0.09 |
| Hybrids | NKXS01004217.1 | 13018  | 0.09 |
| Hybrids | NKXS01004219.1 | 73728  | 0.09 |
| Hybrids | NKXS01004245.1 | 19564  | 0.09 |
| Hybrids | NKXS01004247.1 | 38703  | 0.09 |
| Hybrids | NKXS01004323.1 | 3182   | 0.09 |
| Hybrids | NKXS01004323.1 | 3254   | 0.09 |
| Hybrids | NKXS01004328.1 | 48609  | 0.09 |
| Hybrids | NKXS01004334.1 | 90202  | 0.09 |
| Hybrids | NKXS01004334.1 | 90206  | 0.09 |
| Hybrids | NKXS01004338.1 | 17930  | 0.09 |
| Hybrids | NKXS01004338.1 | 17954  | 0.09 |
| Hybrids | NKXS01004338.1 | 18095  | 0.09 |
| Hybrids | NKXS01004360.1 | 28713  | 0.09 |
| Hybrids | NKXS01004369.1 | 11255  | 0.09 |
| Hybrids | NKXS01004369.1 | 11333  | 0.09 |
| Hybrids | NKXS01004381.1 | 56420  | 0.09 |
| Hybrids | NKXS01004411.1 | 19623  | 0.09 |
| Hybrids | NKXS01004420.1 | 24384  | 0.09 |

|         |                |       |      |
|---------|----------------|-------|------|
| Hybrids | NKXS01004421.1 | 46376 | 0.09 |
| Hybrids | NKXS01004458.1 | 32601 | 0.09 |
| Hybrids | NKXS01004473.1 | 7172  | 0.09 |
| Hybrids | NKXS01004485.1 | 30069 | 0.09 |
| Hybrids | NKXS01004485.1 | 30213 | 0.09 |
| Hybrids | NKXS01004485.1 | 30234 | 0.09 |
| Hybrids | NKXS01004485.1 | 30274 | 0.09 |
| Hybrids | NKXS01004491.1 | 18087 | 0.09 |
| Hybrids | NKXS01004491.1 | 18282 | 0.09 |
| Hybrids | NKXS01004510.1 | 16506 | 0.09 |
| Hybrids | NKXS01004510.1 | 16507 | 0.09 |
| Hybrids | NKXS01004510.1 | 16508 | 0.09 |
| Hybrids | NKXS01004510.1 | 16547 | 0.09 |
| Hybrids | NKXS01004510.1 | 16613 | 0.09 |
| Hybrids | NKXS01004510.1 | 16621 | 0.09 |
| Hybrids | NKXS01004510.1 | 16636 | 0.09 |
| Hybrids | NKXS01004510.1 | 16705 | 0.09 |
| Hybrids | NKXS01004529.1 | 48658 | 0.09 |
| Hybrids | NKXS01004535.1 | 13409 | 0.09 |
| Hybrids | NKXS01004535.1 | 13431 | 0.09 |
| Hybrids | NKXS01004567.1 | 24376 | 0.09 |
| Hybrids | NKXS01004567.1 | 24443 | 0.09 |
| Hybrids | NKXS01004567.1 | 24450 | 0.09 |
| Hybrids | NKXS01004567.1 | 24467 | 0.09 |
| Hybrids | NKXS01004567.1 | 24520 | 0.09 |
| Hybrids | NKXS01004567.1 | 24571 | 0.09 |
| Hybrids | NKXS01004570.1 | 17297 | 0.09 |
| Hybrids | NKXS01004583.1 | 13713 | 0.09 |
| Hybrids | NKXS01004614.1 | 38202 | 0.09 |
| Hybrids | NKXS01004614.1 | 38256 | 0.09 |
| Hybrids | NKXS01004620.1 | 9354  | 0.09 |
| Hybrids | NKXS01004620.1 | 9928  | 0.09 |
| Hybrids | NKXS01004624.1 | 46627 | 0.09 |
| Hybrids | NKXS01004639.1 | 12253 | 0.09 |
| Hybrids | NKXS01004643.1 | 17248 | 0.09 |
| Hybrids | NKXS01004707.1 | 17116 | 0.09 |
| Hybrids | NKXS01004707.1 | 17117 | 0.09 |
| Hybrids | NKXS01004724.1 | 16529 | 0.09 |
| Hybrids | NKXS01004731.1 | 7599  | 0.09 |
| Hybrids | NKXS01004756.1 | 15430 | 0.09 |
| Hybrids | NKXS01004756.1 | 15487 | 0.09 |
| Hybrids | NKXS01004756.1 | 15631 | 0.09 |
| Hybrids | NKXS01004763.1 | 23269 | 0.09 |
| Hybrids | NKXS01004763.1 | 23282 | 0.09 |

|         |                |       |      |
|---------|----------------|-------|------|
| Hybrids | NKXS01004763.1 | 40506 | 0.09 |
| Hybrids | NKXS01004768.1 | 11315 | 0.09 |
| Hybrids | NKXS01004801.1 | 28730 | 0.09 |
| Hybrids | NKXS01004803.1 | 22798 | 0.09 |
| Hybrids | NKXS01004803.1 | 22819 | 0.09 |
| Hybrids | NKXS01004803.1 | 23019 | 0.09 |
| Hybrids | NKXS01004812.1 | 29502 | 0.09 |
| Hybrids | NKXS01004812.1 | 29505 | 0.09 |
| Hybrids | NKXS01004812.1 | 29513 | 0.09 |
| Hybrids | NKXS01004821.1 | 20378 | 0.09 |
| Hybrids | NKXS01004826.1 | 21748 | 0.09 |
| Hybrids | NKXS01004852.1 | 1050  | 0.09 |
| Hybrids | NKXS01004874.1 | 15006 | 0.09 |
| Hybrids | NKXS01004913.1 | 56830 | 0.09 |
| Hybrids | NKXS01004919.1 | 2155  | 0.09 |
| Hybrids | NKXS01004944.1 | 44946 | 0.09 |
| Hybrids | NKXS01004944.1 | 45170 | 0.09 |
| Hybrids | NKXS01004951.1 | 20800 | 0.09 |
| Hybrids | NKXS01004969.1 | 28819 | 0.09 |
| Hybrids | NKXS01004980.1 | 51182 | 0.09 |
| Hybrids | NKXS01005006.1 | 55806 | 0.09 |
| Hybrids | NKXS01005006.1 | 55843 | 0.09 |
| Hybrids | NKXS01005047.1 | 13777 | 0.09 |
| Hybrids | NKXS01005050.1 | 54672 | 0.09 |
| Hybrids | NKXS01005055.1 | 5472  | 0.09 |
| Hybrids | NKXS01005055.1 | 5597  | 0.09 |
| Hybrids | NKXS01005135.1 | 12455 | 0.09 |
| Hybrids | NKXS01005135.1 | 12531 | 0.09 |
| Hybrids | NKXS01005135.1 | 12636 | 0.09 |
| Hybrids | NKXS01005135.1 | 12685 | 0.09 |
| Hybrids | NKXS01005135.1 | 12687 | 0.09 |
| Hybrids | NKXS01005165.1 | 33476 | 0.09 |
| Hybrids | NKXS01005172.1 | 42528 | 0.09 |
| Hybrids | NKXS01005199.1 | 28154 | 0.09 |
| Hybrids | NKXS01005199.1 | 28162 | 0.09 |
| Hybrids | NKXS01005202.1 | 31924 | 0.09 |
| Hybrids | NKXS01005209.1 | 21840 | 0.09 |
| Hybrids | NKXS01005210.1 | 1655  | 0.09 |
| Hybrids | NKXS01005210.1 | 1659  | 0.09 |
| Hybrids | NKXS01005218.1 | 41480 | 0.09 |
| Hybrids | NKXS01005244.1 | 23043 | 0.09 |
| Hybrids | NKXS01005244.1 | 23100 | 0.09 |
| Hybrids | NKXS01005244.1 | 23192 | 0.09 |
| Hybrids | NKXS01005244.1 | 23193 | 0.09 |

|         |                |       |      |
|---------|----------------|-------|------|
| Hybrids | NKXS01005245.1 | 26921 | 0.09 |
| Hybrids | NKXS01005245.1 | 26967 | 0.09 |
| Hybrids | NKXS01005260.1 | 909   | 0.09 |
| Hybrids | NKXS01005264.1 | 1086  | 0.09 |
| Hybrids | NKXS01005312.1 | 11735 | 0.09 |
| Hybrids | NKXS01005312.1 | 11766 | 0.09 |
| Hybrids | NKXS01005312.1 | 11880 | 0.09 |
| Hybrids | NKXS01005312.1 | 11882 | 0.09 |
| Hybrids | NKXS01005312.1 | 11897 | 0.09 |
| Hybrids | NKXS01005322.1 | 33491 | 0.09 |
| Hybrids | NKXS01005329.1 | 53547 | 0.09 |
| Hybrids | NKXS01005368.1 | 1188  | 0.09 |
| Hybrids | NKXS01005368.1 | 1226  | 0.09 |
| Hybrids | NKXS01005368.1 | 1247  | 0.09 |
| Hybrids | NKXS01005368.1 | 1342  | 0.09 |
| Hybrids | NKXS01005413.1 | 36098 | 0.09 |
| Hybrids | NKXS01005413.1 | 36263 | 0.09 |
| Hybrids | NKXS01005417.1 | 48189 | 0.09 |
| Hybrids | NKXS01005417.1 | 48191 | 0.09 |
| Hybrids | NKXS01005417.1 | 48195 | 0.09 |
| Hybrids | NKXS01005417.1 | 48216 | 0.09 |
| Hybrids | NKXS01005417.1 | 48312 | 0.09 |
| Hybrids | NKXS01005417.1 | 48315 | 0.09 |
| Hybrids | NKXS01005417.1 | 48321 | 0.09 |
| Hybrids | NKXS01005417.1 | 48324 | 0.09 |
| Hybrids | NKXS01005417.1 | 48327 | 0.09 |
| Hybrids | NKXS01005461.1 | 3766  | 0.09 |
| Hybrids | NKXS01005462.1 | 21851 | 0.09 |
| Hybrids | NKXS01005462.1 | 22024 | 0.09 |
| Hybrids | NKXS01005463.1 | 11676 | 0.09 |
| Hybrids | NKXS01005463.1 | 41119 | 0.09 |
| Hybrids | NKXS01005511.1 | 37270 | 0.09 |
| Hybrids | NKXS01005540.1 | 4991  | 0.09 |
| Hybrids | NKXS01005541.1 | 11822 | 0.09 |
| Hybrids | NKXS01005593.1 | 21437 | 0.09 |
| Hybrids | NKXS01005612.1 | 19895 | 0.09 |
| Hybrids | NKXS01005629.1 | 44451 | 0.09 |
| Hybrids | NKXS01005636.1 | 18019 | 0.09 |
| Hybrids | NKXS01005646.1 | 67237 | 0.09 |
| Hybrids | NKXS01005646.1 | 67243 | 0.09 |
| Hybrids | NKXS01005684.1 | 10405 | 0.09 |
| Hybrids | NKXS01005698.1 | 37718 | 0.09 |
| Hybrids | NKXS01005719.1 | 18875 | 0.09 |
| Hybrids | NKXS01005725.1 | 43250 | 0.09 |

|         |                |       |      |
|---------|----------------|-------|------|
| Hybrids | NKXS01005725.1 | 43265 | 0.09 |
| Hybrids | NKXS01005789.1 | 10680 | 0.09 |
| Hybrids | NKXS01005789.1 | 10688 | 0.09 |
| Hybrids | NKXS01005789.1 | 23815 | 0.09 |
| Hybrids | NKXS01005806.1 | 4247  | 0.09 |
| Hybrids | NKXS01005826.1 | 1637  | 0.09 |
| Hybrids | NKXS01005827.1 | 32317 | 0.09 |
| Hybrids | NKXS01005827.1 | 32356 | 0.09 |
| Hybrids | NKXS01005827.1 | 32465 | 0.09 |
| Hybrids | NKXS01005827.1 | 32488 | 0.09 |
| Hybrids | NKXS01005827.1 | 32489 | 0.09 |
| Hybrids | NKXS01005827.1 | 32517 | 0.09 |
| Hybrids | NKXS01005827.1 | 32545 | 0.09 |
| Hybrids | NKXS01005911.1 | 33914 | 0.09 |
| Hybrids | NKXS01005913.1 | 44609 | 0.09 |
| Hybrids | NKXS01005958.1 | 27157 | 0.09 |
| Hybrids | NKXS01005958.1 | 27171 | 0.09 |
| Hybrids | NKXS01005984.1 | 11698 | 0.09 |
| Hybrids | NKXS01005998.1 | 41160 | 0.09 |
| Hybrids | NKXS01005998.1 | 41232 | 0.09 |
| Hybrids | NKXS01006000.1 | 40653 | 0.09 |
| Hybrids | NKXS01006013.1 | 9406  | 0.09 |
| Hybrids | NKXS01006017.1 | 6125  | 0.09 |
| Hybrids | NKXS01006020.1 | 2659  | 0.09 |
| Hybrids | NKXS01006020.1 | 2690  | 0.09 |
| Hybrids | NKXS01006060.1 | 61865 | 0.09 |
| Hybrids | NKXS01006060.1 | 61894 | 0.09 |
| Hybrids | NKXS01006071.1 | 37960 | 0.09 |
| Hybrids | NKXS01006078.1 | 22257 | 0.09 |
| Hybrids | NKXS01006083.1 | 33439 | 0.09 |
| Hybrids | NKXS01006095.1 | 48602 | 0.09 |
| Hybrids | NKXS01006095.1 | 48609 | 0.09 |
| Hybrids | NKXS01006095.1 | 48650 | 0.09 |
| Hybrids | NKXS01006095.1 | 48689 | 0.09 |
| Hybrids | NKXS01006095.1 | 48787 | 0.09 |
| Hybrids | NKXS01006096.1 | 20328 | 0.09 |
| Hybrids | NKXS01006096.1 | 20421 | 0.09 |
| Hybrids | NKXS01006266.1 | 136   | 0.09 |
| Hybrids | NKXS01006266.1 | 195   | 0.09 |
| Hybrids | NKXS01006266.1 | 232   | 0.09 |
| Hybrids | NKXS01006266.1 | 260   | 0.09 |
| Hybrids | NKXS01006277.1 | 5818  | 0.09 |
| Hybrids | NKXS01006304.1 | 40659 | 0.09 |
| Hybrids | NKXS01006304.1 | 40900 | 0.09 |

|         |                |       |      |
|---------|----------------|-------|------|
| Hybrids | NKXS01006314.1 | 62660 | 0.09 |
| Hybrids | NKXS01006314.1 | 62707 | 0.09 |
| Hybrids | NKXS01006314.1 | 62724 | 0.09 |
| Hybrids | NKXS01006314.1 | 62732 | 0.09 |
| Hybrids | NKXS01006314.1 | 62801 | 0.09 |
| Hybrids | NKXS01006362.1 | 18540 | 0.09 |
| Hybrids | NKXS01006376.1 | 13919 | 0.09 |
| Hybrids | NKXS01006376.1 | 14034 | 0.09 |
| Hybrids | NKXS01006381.1 | 24046 | 0.09 |
| Hybrids | NKXS01006381.1 | 24080 | 0.09 |
| Hybrids | NKXS01006381.1 | 24133 | 0.09 |
| Hybrids | NKXS01006381.1 | 24162 | 0.09 |
| Hybrids | NKXS01006381.1 | 24262 | 0.09 |
| Hybrids | NKXS01006381.1 | 24277 | 0.09 |
| Hybrids | NKXS01006381.1 | 24286 | 0.09 |
| Hybrids | NKXS01006395.1 | 7782  | 0.09 |
| Hybrids | NKXS01006395.1 | 7880  | 0.09 |
| Hybrids | NKXS01006395.1 | 9189  | 0.09 |
| Hybrids | NKXS01006409.1 | 1178  | 0.09 |
| Hybrids | NKXS01006409.1 | 1254  | 0.09 |
| Hybrids | NKXS01006417.1 | 32134 | 0.09 |
| Hybrids | NKXS01006417.1 | 32316 | 0.09 |
| Hybrids | NKXS01006490.1 | 30397 | 0.09 |
| Hybrids | NKXS01006517.1 | 4326  | 0.09 |
| Hybrids | NKXS01006517.1 | 4332  | 0.09 |
| Hybrids | NKXS01006544.1 | 13276 | 0.09 |
| Hybrids | NKXS01006544.1 | 13286 | 0.09 |
| Hybrids | NKXS01006554.1 | 11428 | 0.09 |
| Hybrids | NKXS01006590.1 | 32263 | 0.09 |
| Hybrids | NKXS01006609.1 | 5624  | 0.09 |
| Hybrids | NKXS01006619.1 | 34760 | 0.09 |
| Hybrids | NKXS01006619.1 | 34769 | 0.09 |
| Hybrids | NKXS01006624.1 | 20985 | 0.09 |
| Hybrids | NKXS01006624.1 | 22569 | 0.09 |
| Hybrids | NKXS01006737.1 | 24022 | 0.09 |
| Hybrids | NKXS01006739.1 | 20562 | 0.09 |
| Hybrids | NKXS01006739.1 | 20597 | 0.09 |
| Hybrids | NKXS01006739.1 | 20691 | 0.09 |
| Hybrids | NKXS01006806.1 | 16336 | 0.09 |
| Hybrids | NKXS01006825.1 | 14561 | 0.09 |
| Hybrids | NKXS01006883.1 | 16520 | 0.09 |
| Hybrids | NKXS01006883.1 | 23912 | 0.09 |
| Hybrids | NKXS01006883.1 | 23950 | 0.09 |
| Hybrids | NKXS01006920.1 | 32298 | 0.09 |

|         |                |       |      |
|---------|----------------|-------|------|
| Hybrids | NKXS01006920.1 | 32354 | 0.09 |
| Hybrids | NKXS01006931.1 | 27331 | 0.09 |
| Hybrids | NKXS01006941.1 | 20593 | 0.09 |
| Hybrids | NKXS01006941.1 | 20603 | 0.09 |
| Hybrids | NKXS01006941.1 | 20677 | 0.09 |
| Hybrids | NKXS01006999.1 | 12690 | 0.09 |
| Hybrids | NKXS01006999.1 | 12720 | 0.09 |
| Hybrids | NKXS01007055.1 | 11318 | 0.09 |
| Hybrids | NKXS01007055.1 | 11333 | 0.09 |
| Hybrids | NKXS01007118.1 | 15204 | 0.09 |
| Hybrids | NKXS01007119.1 | 46651 | 0.09 |
| Hybrids | NKXS01007119.1 | 46655 | 0.09 |
| Hybrids | NKXS01007121.1 | 8615  | 0.09 |
| Hybrids | NKXS01007121.1 | 8649  | 0.09 |
| Hybrids | NKXS01007121.1 | 8673  | 0.09 |
| Hybrids | NKXS01007121.1 | 8711  | 0.09 |
| Hybrids | NKXS01007189.1 | 18698 | 0.09 |
| Hybrids | NKXS01007189.1 | 18735 | 0.09 |
| Hybrids | NKXS01007189.1 | 18833 | 0.09 |
| Hybrids | NKXS01007189.1 | 18845 | 0.09 |
| Hybrids | NKXS01007189.1 | 18874 | 0.09 |
| Hybrids | NKXS01007227.1 | 21489 | 0.09 |
| Hybrids | NKXS01007359.1 | 1813  | 0.09 |
| Hybrids | NKXS01007359.1 | 1839  | 0.09 |
| Hybrids | NKXS01007359.1 | 1851  | 0.09 |
| Hybrids | NKXS01007359.1 | 1881  | 0.09 |
| Hybrids | NKXS01007359.1 | 1916  | 0.09 |
| Hybrids | NKXS01007359.1 | 1967  | 0.09 |
| Hybrids | NKXS01007365.1 | 4337  | 0.09 |
| Hybrids | NKXS01007405.1 | 25376 | 0.09 |
| Hybrids | NKXS01007414.1 | 3399  | 0.09 |
| Hybrids | NKXS01007414.1 | 3410  | 0.09 |
| Hybrids | NKXS01007414.1 | 3504  | 0.09 |
| Hybrids | NKXS01007455.1 | 15203 | 0.09 |
| Hybrids | NKXS01007455.1 | 15319 | 0.09 |
| Hybrids | NKXS01007461.1 | 21438 | 0.09 |
| Hybrids | NKXS01007461.1 | 21635 | 0.09 |
| Hybrids | NKXS01007501.1 | 474   | 0.09 |
| Hybrids | NKXS01007519.1 | 10885 | 0.09 |
| Hybrids | NKXS01007543.1 | 8920  | 0.09 |
| Hybrids | NKXS01007550.1 | 14802 | 0.09 |
| Hybrids | NKXS01007550.1 | 14898 | 0.09 |
| Hybrids | NKXS01007683.1 | 24161 | 0.09 |
| Hybrids | NKXS01007703.1 | 11885 | 0.09 |



|         |                |       |      |
|---------|----------------|-------|------|
| Hybrids | NKXS01007703.1 | 12439 | 0.09 |
| Hybrids | NKXS01007812.1 | 4394  | 0.09 |
| Hybrids | NKXS01007825.1 | 5626  | 0.09 |
| Hybrids | NKXS01007843.1 | 2118  | 0.09 |
| Hybrids | NKXS01007843.1 | 2159  | 0.09 |
| Hybrids | NKXS01007843.1 | 2233  | 0.09 |
| Hybrids | NKXS01007844.1 | 14024 | 0.09 |
| Hybrids | NKXS01007911.1 | 7196  | 0.09 |
| Hybrids | NKXS01007915.1 | 8244  | 0.09 |
| Hybrids | NKXS01007927.1 | 17363 | 0.09 |
| Hybrids | NKXS01007985.1 | 6780  | 0.09 |
| Hybrids | NKXS01008042.1 | 3146  | 0.09 |
| Hybrids | NKXS01008073.1 | 8696  | 0.09 |
| Hybrids | NKXS01008142.1 | 9618  | 0.09 |
| Hybrids | NKXS01008188.1 | 14470 | 0.09 |
| Hybrids | NKXS01008191.1 | 10856 | 0.09 |
| Hybrids | NKXS01008191.1 | 10976 | 0.09 |
| Hybrids | NKXS01008191.1 | 10985 | 0.09 |
| Hybrids | NKXS01008197.1 | 13623 | 0.09 |
| Hybrids | NKXS01008197.1 | 14108 | 0.09 |
| Hybrids | NKXS01008197.1 | 14193 | 0.09 |
| Hybrids | NKXS01008197.1 | 14202 | 0.09 |
| Hybrids | NKXS01008197.1 | 14220 | 0.09 |
| Hybrids | NKXS01008197.1 | 14235 | 0.09 |
| Hybrids | NKXS01008313.1 | 15866 | 0.09 |
| Hybrids | NKXS01008321.1 | 14090 | 0.09 |
| Hybrids | NKXS01008479.1 | 18173 | 0.09 |
| Hybrids | NKXS01008530.1 | 16981 | 0.09 |
| Hybrids | NKXS01008565.1 | 17193 | 0.09 |
| Hybrids | NKXS01008604.1 | 2500  | 0.09 |
| Hybrids | NKXS01008628.1 | 12446 | 0.09 |
| Hybrids | NKXS01008628.1 | 12549 | 0.09 |
| Hybrids | NKXS01008628.1 | 14530 | 0.09 |
| Hybrids | NKXS01008742.1 | 14530 | 0.09 |
| Hybrids | NKXS01008785.1 | 8662  | 0.09 |
| Hybrids | NKXS01008835.1 | 8801  | 0.09 |
| Hybrids | NKXS01008881.1 | 11266 | 0.09 |
| Hybrids | NKXS01008881.1 | 11323 | 0.09 |
| Hybrids | NKXS01008898.1 | 4415  | 0.09 |
| Hybrids | NKXS01008898.1 | 6724  | 0.09 |
| Hybrids | NKXS01008898.1 | 6890  | 0.09 |
| Hybrids | NKXS01008914.1 | 952   | 0.09 |
| Hybrids | NKXS01008935.1 | 9637  | 0.09 |
| Hybrids | NKXS01008935.1 | 9745  | 0.09 |

|         |                |       |      |
|---------|----------------|-------|------|
| Hybrids | NKXS01008935.1 | 9812  | 0.09 |
| Hybrids | NKXS01008955.1 | 13709 | 0.09 |
| Hybrids | NKXS01009088.1 | 2373  | 0.09 |
| Hybrids | NKXS01009088.1 | 2442  | 0.09 |
| Hybrids | NKXS01009088.1 | 2492  | 0.09 |
| Hybrids | NKXS01009088.1 | 2571  | 0.09 |
| Hybrids | NKXS01009093.1 | 4188  | 0.09 |
| Hybrids | NKXS01009093.1 | 4189  | 0.09 |
| Hybrids | NKXS01009093.1 | 4225  | 0.09 |
| Hybrids | NKXS01009093.1 | 4255  | 0.09 |
| Hybrids | NKXS01009107.1 | 8066  | 0.09 |
| Hybrids | NKXS01009120.1 | 6866  | 0.09 |
| Hybrids | NKXS01009120.1 | 7013  | 0.09 |
| Hybrids | NKXS01009188.1 | 8982  | 0.09 |
| Hybrids | NKXS01009215.1 | 11832 | 0.09 |
| Hybrids | NKXS01009215.1 | 11842 | 0.09 |
| Hybrids | NKXS01009508.1 | 4122  | 0.09 |
| Hybrids | NKXS01009508.1 | 4126  | 0.09 |
| Hybrids | NKXS01009508.1 | 4127  | 0.09 |
| Hybrids | NKXS01009508.1 | 4140  | 0.09 |
| Hybrids | NKXS01009549.1 | 340   | 0.09 |
| Hybrids | NKXS01009549.1 | 388   | 0.09 |
| Hybrids | NKXS01009604.1 | 5577  | 0.09 |
| Hybrids | NKXS01009604.1 | 5580  | 0.09 |
| Hybrids | NKXS01009604.1 | 5584  | 0.09 |
| Hybrids | NKXS01009737.1 | 7328  | 0.09 |
| Hybrids | NKXS01009737.1 | 7331  | 0.09 |
| Hybrids | NKXS01009876.1 | 2201  | 0.09 |
| Hybrids | NKXS01009876.1 | 2274  | 0.09 |
| Hybrids | NKXS01009948.1 | 1602  | 0.09 |
| Hybrids | NKXS01009959.1 | 2817  | 0.09 |
| Hybrids | NKXS01009959.1 | 2818  | 0.09 |
| Hybrids | NKXS01009959.1 | 2986  | 0.09 |
| Hybrids | NKXS01009959.1 | 3048  | 0.09 |
| Hybrids | NKXS01009989.1 | 5171  | 0.09 |
| Hybrids | NKXS01010170.1 | 1458  | 0.09 |
| Hybrids | NKXS01010170.1 | 1469  | 0.09 |
| Hybrids | NKXS01010170.1 | 1484  | 0.09 |
| Hybrids | NKXS01010261.1 | 6506  | 0.09 |
| Hybrids | NKXS01010411.1 | 4159  | 0.09 |
| Hybrids | NKXS01011684.1 | 142   | 0.09 |
| Hybrids | NKXS01011684.1 | 333   | 0.09 |
| Hybrids | NKXS01012054.1 | 500   | 0.09 |
| Hybrids | NKXS01012069.1 | 755   | 0.09 |

|         |                |     |      |
|---------|----------------|-----|------|
| Hybrids | NKXS01012069.1 | 810 | 0.09 |
| Hybrids | NKXS01012469.1 | 331 | 0.09 |
| Hybrids | NKXS01012469.1 | 385 | 0.09 |
| Hybrids | NKXS01012469.1 | 420 | 0.09 |
| Hybrids | NKXS01012469.1 | 540 | 0.09 |
| Hybrids | NKXS01012523.1 | 956 | 0.09 |

---
