# Supplementary material for: Identification of Commercial Cultivars in the Tabebuia Alliance Using Genotyping-by-Sequencing
Source: MDPI journal article supplement (doi:10.3390/f14020271), 2023-01-31
Supplement: s1 [file s1]

**Table S3.** High-quality loci could be used for distinguish cultivar in *H. chrysanthus*

| Species               | Scaffolds      | Position | Rate of no-majority genotype |
|-----------------------|----------------|----------|------------------------------|
| <i>H. chrysanthus</i> | NKXS01006603.1 | 35428    | 0.35                         |
| <i>H. chrysanthus</i> | NKXS01005446.1 | 18598    | 0.31                         |
| <i>H. chrysanthus</i> | NKXS01005446.1 | 18584    | 0.31                         |
| <i>H. chrysanthus</i> | NKXS01003275.1 | 37835    | 0.27                         |
| <i>H. chrysanthus</i> | NKXS01004801.1 | 28766    | 0.23                         |
| <i>H. chrysanthus</i> | NKXS01000068.1 | 166324   | 0.23                         |
| <i>H. chrysanthus</i> | NKXS01000631.1 | 163667   | 0.23                         |
| <i>H. chrysanthus</i> | NKXS01001954.1 | 47087    | 0.23                         |
| <i>H. chrysanthus</i> | NKXS01002063.1 | 53905    | 0.19                         |
| <i>H. chrysanthus</i> | NKXS01003972.1 | 15450    | 0.19                         |
| <i>H. chrysanthus</i> | NKXS01000067.1 | 4918     | 0.19                         |
| <i>H. chrysanthus</i> | NKXS01000067.1 | 4886     | 0.19                         |
| <i>H. chrysanthus</i> | NKXS01005499.1 | 6472     | 0.19                         |
| <i>H. chrysanthus</i> | NKXS01000559.1 | 13471    | 0.15                         |
| <i>H. chrysanthus</i> | NKXS01002823.1 | 12202    | 0.15                         |
| <i>H. chrysanthus</i> | NKXS01004763.1 | 40423    | 0.15                         |
| <i>H. chrysanthus</i> | NKXS01000175.1 | 58019    | 0.15                         |
| <i>H. chrysanthus</i> | NKXS01000538.1 | 80975    | 0.15                         |
| <i>H. chrysanthus</i> | NKXS01006417.1 | 32093    | 0.12                         |
| <i>H. chrysanthus</i> | NKXS01006417.1 | 32303    | 0.12                         |
| <i>H. chrysanthus</i> | NKXS01000397.1 | 300      | 0.12                         |
| <i>H. chrysanthus</i> | NKXS01001400.1 | 10134    | 0.12                         |
| <i>H. chrysanthus</i> | NKXS01004485.1 | 30241    | 0.12                         |
| <i>H. chrysanthus</i> | NKXS01000532.1 | 70743    | 0.12                         |
| <i>H. chrysanthus</i> | NKXS01005943.1 | 1890     | 0.12                         |
| <i>H. chrysanthus</i> | NKXS01004137.1 | 28967    | 0.12                         |
| <i>H. chrysanthus</i> | NKXS01000030.1 | 357849   | 0.12                         |
| <i>H. chrysanthus</i> | NKXS01002231.1 | 56328    | 0.12                         |
| <i>H. chrysanthus</i> | NKXS01002231.1 | 56340    | 0.12                         |
| <i>H. chrysanthus</i> | NKXS01006096.1 | 14784    | 0.12                         |
| <i>H. chrysanthus</i> | NKXS01006096.1 | 14888    | 0.12                         |
| <i>H. chrysanthus</i> | NKXS01004485.1 | 30122    | 0.12                         |
| <i>H. chrysanthus</i> | NKXS01004485.1 | 30246    | 0.12                         |
| <i>H. chrysanthus</i> | NKXS01001185.1 | 87798    | 0.12                         |
| <i>H. chrysanthus</i> | NKXS01006630.1 | 231      | 0.12                         |
| <i>H. chrysanthus</i> | NKXS01004137.1 | 29057    | 0.12                         |
| <i>H. chrysanthus</i> | NKXS01006631.1 | 44084    | 0.12                         |
| <i>H. chrysanthus</i> | NKXS01000782.1 | 80725    | 0.12                         |
| <i>H. chrysanthus</i> | NKXS01004944.1 | 45311    | 0.12                         |
| <i>H. chrysanthus</i> | NKXS01004485.1 | 30162    | 0.12                         |
| <i>H. chrysanthus</i> | NKXS01004485.1 | 30302    | 0.12                         |
| <i>H. chrysanthus</i> | NKXS01007280.1 | 9882     | 0.08                         |

|                       |                |        |      |
|-----------------------|----------------|--------|------|
| <i>H. chrysanthus</i> | NKXS01003893.1 | 24259  | 0.08 |
| <i>H. chrysanthus</i> | NKXS01008321.1 | 13895  | 0.08 |
| <i>H. chrysanthus</i> | NKXS01001085.1 | 72157  | 0.08 |
| <i>H. chrysanthus</i> | NKXS01003480.1 | 9587   | 0.08 |
| <i>H. chrysanthus</i> | NKXS01003893.1 | 24251  | 0.08 |
| <i>H. chrysanthus</i> | NKXS01004570.1 | 17159  | 0.08 |
| <i>H. chrysanthus</i> | NKXS01002749.1 | 28623  | 0.08 |
| <i>H. chrysanthus</i> | NKXS01007870.1 | 11268  | 0.08 |
| <i>H. chrysanthus</i> | NKXS01007870.1 | 11436  | 0.08 |
| <i>H. chrysanthus</i> | NKXS01003981.1 | 26609  | 0.08 |
| <i>H. chrysanthus</i> | NKXS01007188.1 | 20465  | 0.08 |
| <i>H. chrysanthus</i> | NKXS01007188.1 | 20469  | 0.08 |
| <i>H. chrysanthus</i> | NKXS01008073.1 | 8666   | 0.08 |
| <i>H. chrysanthus</i> | NKXS01003576.1 | 35570  | 0.08 |
| <i>H. chrysanthus</i> | NKXS01002356.1 | 29157  | 0.08 |
| <i>H. chrysanthus</i> | NKXS01002017.1 | 64205  | 0.08 |
| <i>H. chrysanthus</i> | NKXS01006250.1 | 21024  | 0.08 |
| <i>H. chrysanthus</i> | NKXS01007870.1 | 11406  | 0.08 |
| <i>H. chrysanthus</i> | NKXS01000559.1 | 50167  | 0.08 |
| <i>H. chrysanthus</i> | NKXS01001085.1 | 72100  | 0.08 |
| <i>H. chrysanthus</i> | NKXS01002166.1 | 77446  | 0.08 |
| <i>H. chrysanthus</i> | NKXS01003336.1 | 9767   | 0.08 |
| <i>H. chrysanthus</i> | NKXS01003056.1 | 67427  | 0.08 |
| <i>H. chrysanthus</i> | NKXS01000661.1 | 7643   | 0.08 |
| <i>H. chrysanthus</i> | NKXS01002401.1 | 56615  | 0.08 |
| <i>H. chrysanthus</i> | NKXS01000704.1 | 135390 | 0.08 |
| <i>H. chrysanthus</i> | NKXS01004579.1 | 41283  | 0.08 |
| <i>H. chrysanthus</i> | NKXS01000269.1 | 41760  | 0.08 |
| <i>H. chrysanthus</i> | NKXS01002516.1 | 31690  | 0.08 |
| <i>H. chrysanthus</i> | NKXS01000132.1 | 19150  | 0.08 |
| <i>H. chrysanthus</i> | NKXS01009180.1 | 8414   | 0.08 |
| <i>H. chrysanthus</i> | NKXS01000558.1 | 93925  | 0.08 |
| <i>H. chrysanthus</i> | NKXS01001274.1 | 48631  | 0.08 |
| <i>H. chrysanthus</i> | NKXS01009180.1 | 8294   | 0.08 |
| <i>H. chrysanthus</i> | NKXS01001494.1 | 35435  | 0.08 |
| <i>H. chrysanthus</i> | NKXS01003056.1 | 67243  | 0.08 |
| <i>H. chrysanthus</i> | NKXS01004098.1 | 31814  | 0.08 |
| <i>H. chrysanthus</i> | NKXS01001995.1 | 47329  | 0.08 |
| <i>H. chrysanthus</i> | NKXS01007870.1 | 11457  | 0.08 |
| <i>H. chrysanthus</i> | NKXS01006522.1 | 15164  | 0.08 |
| <i>H. chrysanthus</i> | NKXS01004311.1 | 23395  | 0.08 |
| <i>H. chrysanthus</i> | NKXS01002356.1 | 28991  | 0.08 |
| <i>H. chrysanthus</i> | NKXS01002578.1 | 14398  | 0.08 |
| <i>H. chrysanthus</i> | NKXS01002401.1 | 56609  | 0.08 |

|                       |                |        |      |
|-----------------------|----------------|--------|------|
| <i>H. chrysanthus</i> | NKXS01008049.1 | 10304  | 0.08 |
| <i>H. chrysanthus</i> | NKXS01002402.1 | 105337 | 0.08 |
| <i>H. chrysanthus</i> | NKXS01000147.1 | 91715  | 0.08 |
| <i>H. chrysanthus</i> | NKXS01000123.1 | 156608 | 0.08 |
| <i>H. chrysanthus</i> | NKXS01000523.1 | 20417  | 0.08 |
| <i>H. chrysanthus</i> | NKXS01003056.1 | 67277  | 0.08 |
| <i>H. chrysanthus</i> | NKXS01001467.1 | 9170   | 0.08 |
| <i>H. chrysanthus</i> | NKXS01000420.1 | 67315  | 0.08 |
| <i>H. chrysanthus</i> | NKXS01002516.1 | 31655  | 0.08 |
| <i>H. chrysanthus</i> | NKXS01000067.1 | 4943   | 0.08 |
| <i>H. chrysanthus</i> | NKXS01001078.1 | 10834  | 0.04 |
| <i>H. chrysanthus</i> | NKXS01001160.1 | 58643  | 0.04 |
| <i>H. chrysanthus</i> | NKXS01007797.1 | 24475  | 0.04 |
| <i>H. chrysanthus</i> | NKXS01004935.1 | 72055  | 0.04 |
| <i>H. chrysanthus</i> | NKXS01001687.1 | 71027  | 0.04 |
| <i>H. chrysanthus</i> | NKXS01006000.1 | 40724  | 0.04 |
| <i>H. chrysanthus</i> | NKXS01004780.1 | 26277  | 0.04 |
| <i>H. chrysanthus</i> | NKXS01004935.1 | 71974  | 0.04 |
| <i>H. chrysanthus</i> | NKXS01000087.1 | 12795  | 0.04 |
| <i>H. chrysanthus</i> | NKXS01000164.1 | 87247  | 0.04 |
| <i>H. chrysanthus</i> | NKXS01006232.1 | 47056  | 0.04 |
| <i>H. chrysanthus</i> | NKXS01006060.1 | 61894  | 0.04 |
| <i>H. chrysanthus</i> | NKXS01003743.1 | 18384  | 0.04 |
| <i>H. chrysanthus</i> | NKXS01006060.1 | 61930  | 0.04 |
| <i>H. chrysanthus</i> | NKXS01002427.1 | 33599  | 0.04 |
| <i>H. chrysanthus</i> | NKXS01004543.1 | 82021  | 0.04 |
| <i>H. chrysanthus</i> | NKXS01000016.1 | 30580  | 0.04 |
| <i>H. chrysanthus</i> | NKXS01000016.1 | 30581  | 0.04 |
| <i>H. chrysanthus</i> | NKXS01003743.1 | 18475  | 0.04 |
| <i>H. chrysanthus</i> | NKXS01006096.1 | 14768  | 0.04 |
| <i>H. chrysanthus</i> | NKXS01002834.1 | 42338  | 0.04 |
| <i>H. chrysanthus</i> | NKXS01003364.1 | 6169   | 0.04 |
| <i>H. chrysanthus</i> | NKXS01000087.1 | 12805  | 0.04 |
| <i>H. chrysanthus</i> | NKXS01006096.1 | 14961  | 0.04 |
| <i>H. chrysanthus</i> | NKXS01001459.1 | 105508 | 0.04 |
| <i>H. chrysanthus</i> | NKXS01008848.1 | 3413   | 0.04 |
| <i>H. chrysanthus</i> | NKXS01006417.1 | 32251  | 0.04 |
| <i>H. chrysanthus</i> | NKXS01000189.1 | 23467  | 0.04 |
| <i>H. chrysanthus</i> | NKXS01003333.1 | 69052  | 0.04 |
| <i>H. chrysanthus</i> | NKXS01003639.1 | 1368   | 0.04 |
| <i>H. chrysanthus</i> | NKXS01000576.1 | 79909  | 0.04 |
| <i>H. chrysanthus</i> | NKXS01002718.1 | 472    | 0.04 |
| <i>H. chrysanthus</i> | NKXS01003406.1 | 54257  | 0.04 |
| <i>H. chrysanthus</i> | NKXS01005553.1 | 4254   | 0.04 |

|                       |                |        |      |
|-----------------------|----------------|--------|------|
| <i>H. chrysanthus</i> | NKXS01000905.1 | 141454 | 0.04 |
| <i>H. chrysanthus</i> | NKXS01000905.1 | 141466 | 0.04 |
| <i>H. chrysanthus</i> | NKXS01002655.1 | 45500  | 0.04 |
| <i>H. chrysanthus</i> | NKXS01001466.1 | 147698 | 0.04 |
| <i>H. chrysanthus</i> | NKXS01004812.1 | 29713  | 0.04 |
| <i>H. chrysanthus</i> | NKXS01000463.1 | 121516 | 0.04 |
| <i>H. chrysanthus</i> | NKXS01006417.1 | 32316  | 0.04 |
| <i>H. chrysanthus</i> | NKXS01001027.1 | 21821  | 0.04 |
| <i>H. chrysanthus</i> | NKXS01000172.1 | 90731  | 0.04 |
| <i>H. chrysanthus</i> | NKXS01003823.1 | 44892  | 0.04 |
| <i>H. chrysanthus</i> | NKXS01000353.1 | 159066 | 0.04 |
| <i>H. chrysanthus</i> | NKXS01006096.1 | 14944  | 0.04 |
| <i>H. chrysanthus</i> | NKXS01000873.1 | 6914   | 0.04 |
| <i>H. chrysanthus</i> | NKXS01005273.1 | 31492  | 0.04 |
| <i>H. chrysanthus</i> | NKXS01000852.1 | 118928 | 0.04 |
| <i>H. chrysanthus</i> | NKXS01006303.1 | 22992  | 0.04 |
| <i>H. chrysanthus</i> | NKXS01000905.1 | 141555 | 0.04 |
| <i>H. chrysanthus</i> | NKXS01000905.1 | 141571 | 0.04 |
| <i>H. chrysanthus</i> | NKXS01000905.1 | 141572 | 0.04 |
| <i>H. chrysanthus</i> | NKXS01001466.1 | 147860 | 0.04 |
| <i>H. chrysanthus</i> | NKXS01001570.1 | 18111  | 0.04 |
| <i>H. chrysanthus</i> | NKXS01001096.1 | 82757  | 0.04 |
| <i>H. chrysanthus</i> | NKXS01004935.1 | 71866  | 0.04 |
| <i>H. chrysanthus</i> | NKXS01006762.1 | 15994  | 0.04 |
| <i>H. chrysanthus</i> | NKXS01000149.1 | 101830 | 0.04 |
| <i>H. chrysanthus</i> | NKXS01001232.1 | 77943  | 0.04 |
| <i>H. chrysanthus</i> | NKXS01001248.1 | 89142  | 0.04 |
| <i>H. chrysanthus</i> | NKXS01001248.1 | 89349  | 0.04 |
| <i>H. chrysanthus</i> | NKXS01000652.1 | 84628  | 0.04 |
| <i>H. chrysanthus</i> | NKXS01004935.1 | 71941  | 0.04 |
| <i>H. chrysanthus</i> | NKXS01005172.1 | 46020  | 0.04 |
| <i>H. chrysanthus</i> | NKXS01005172.1 | 46055  | 0.04 |
| <i>H. chrysanthus</i> | NKXS01005172.1 | 45902  | 0.04 |
| <i>H. chrysanthus</i> | NKXS01005172.1 | 46022  | 0.04 |
| <i>H. chrysanthus</i> | NKXS01000087.1 | 12765  | 0.04 |
| <i>H. chrysanthus</i> | NKXS01004539.1 | 1538   | 0.04 |
| <i>H. chrysanthus</i> | NKXS01008945.1 | 2132   | 0.04 |
| <i>H. chrysanthus</i> | NKXS01000157.1 | 168204 | 0.04 |
| <i>H. chrysanthus</i> | NKXS01003743.1 | 18235  | 0.04 |
| <i>H. chrysanthus</i> | NKXS01003743.1 | 18298  | 0.04 |
| <i>H. chrysanthus</i> | NKXS01005273.1 | 31368  | 0.04 |
| <i>H. chrysanthus</i> | NKXS01006250.1 | 18212  | 0.04 |
| <i>H. chrysanthus</i> | NKXS01000777.1 | 8158   | 0.04 |
| <i>H. chrysanthus</i> | NKXS01000959.1 | 44705  | 0.04 |

|                       |                |        |      |
|-----------------------|----------------|--------|------|
| <i>H. chrysanthus</i> | NKXS01002730.1 | 26584  | 0.04 |
| <i>H. chrysanthus</i> | NKXS01000383.1 | 100614 | 0.04 |
| <i>H. chrysanthus</i> | NKXS01002391.1 | 6839   | 0.04 |
| <i>H. chrysanthus</i> | NKXS01001025.1 | 12459  | 0.04 |
| <i>H. chrysanthus</i> | NKXS01003867.1 | 51787  | 0.04 |
| <i>H. chrysanthus</i> | NKXS01003814.1 | 36849  | 0.04 |
| <i>H. chrysanthus</i> | NKXS01009259.1 | 13674  | 0.04 |
| <i>H. chrysanthus</i> | NKXS01002718.1 | 523    | 0.04 |
| <i>H. chrysanthus</i> | NKXS01002718.1 | 576    | 0.04 |
| <i>H. chrysanthus</i> | NKXS01003134.1 | 66341  | 0.04 |
| <i>H. chrysanthus</i> | NKXS01000463.1 | 121556 | 0.04 |
| <i>H. chrysanthus</i> | NKXS01000463.1 | 121658 | 0.04 |
| <i>H. chrysanthus</i> | NKXS01006708.1 | 1153   | 0.04 |
| <i>H. chrysanthus</i> | NKXS01000077.1 | 30722  | 0.04 |
| <i>H. chrysanthus</i> | NKXS01001459.1 | 105416 | 0.04 |
| <i>H. chrysanthus</i> | NKXS01000172.1 | 90783  | 0.04 |
| <i>H. chrysanthus</i> | NKXS01001503.1 | 21535  | 0.04 |
| <i>H. chrysanthus</i> | NKXS01006417.1 | 32173  | 0.04 |
| <i>H. chrysanthus</i> | NKXS01001002.1 | 35863  | 0.04 |
| <i>H. chrysanthus</i> | NKXS01005172.1 | 46085  | 0.04 |
| <i>H. chrysanthus</i> | NKXS01008232.1 | 17709  | 0.04 |
| <i>H. chrysanthus</i> | NKXS01003278.1 | 59729  | 0.04 |
| <i>H. chrysanthus</i> | NKXS01003412.1 | 30814  | 0.04 |
| <i>H. chrysanthus</i> | NKXS01000003.1 | 6049   | 0.04 |
| <i>H. chrysanthus</i> | NKXS01000973.1 | 10859  | 0.04 |
| <i>H. chrysanthus</i> | NKXS01003294.1 | 76882  | 0.04 |
| <i>H. chrysanthus</i> | NKXS01000180.1 | 4272   | 0.04 |
| <i>H. chrysanthus</i> | NKXS01000180.1 | 4326   | 0.04 |
| <i>H. chrysanthus</i> | NKXS01004935.1 | 72049  | 0.04 |
| <i>H. chrysanthus</i> | NKXS01003278.1 | 59774  | 0.04 |
| <i>H. chrysanthus</i> | NKXS01003743.1 | 18334  | 0.04 |
| <i>H. chrysanthus</i> | NKXS01003364.1 | 6165   | 0.04 |
| <i>H. chrysanthus</i> | NKXS01001817.1 | 26079  | 0.04 |
| <i>H. chrysanthus</i> | NKXS01003743.1 | 18295  | 0.04 |
| <i>H. chrysanthus</i> | NKXS01003743.1 | 18317  | 0.04 |
| <i>H. chrysanthus</i> | NKXS01003743.1 | 18387  | 0.04 |
| <i>H. chrysanthus</i> | NKXS01003743.1 | 18496  | 0.04 |
| <i>H. chrysanthus</i> | NKXS01000777.1 | 8186   | 0.04 |
| <i>H. chrysanthus</i> | NKXS01001442.1 | 40150  | 0.04 |
| <i>H. chrysanthus</i> | NKXS01002938.1 | 53122  | 0.04 |
| <i>H. chrysanthus</i> | NKXS01002427.1 | 33695  | 0.04 |
| <i>H. chrysanthus</i> | NKXS01002427.1 | 33708  | 0.04 |
| <i>H. chrysanthus</i> | NKXS01001386.1 | 90765  | 0.04 |
| <i>H. chrysanthus</i> | NKXS01004763.1 | 23274  | 0.04 |

|                       |                |        |      |
|-----------------------|----------------|--------|------|
| <i>H. chrysanthus</i> | NKXS01008935.1 | 9735   | 0.04 |
| <i>H. chrysanthus</i> | NKXS01000123.1 | 156837 | 0.04 |
| <i>H. chrysanthus</i> | NKXS01003193.1 | 11264  | 0.04 |
| <i>H. chrysanthus</i> | NKXS01000517.1 | 130106 | 0.04 |
| <i>H. chrysanthus</i> | NKXS01002329.1 | 51512  | 0.04 |
| <i>H. chrysanthus</i> | NKXS01002938.1 | 52961  | 0.04 |
| <i>H. chrysanthus</i> | NKXS01006417.1 | 32287  | 0.04 |
| <i>H. chrysanthus</i> | NKXS01003113.1 | 52771  | 0.04 |
| <i>H. chrysanthus</i> | NKXS01000172.1 | 90617  | 0.04 |
| <i>H. chrysanthus</i> | NKXS01003867.1 | 61076  | 0.04 |
| <i>H. chrysanthus</i> | NKXS01000172.1 | 90548  | 0.04 |
| <i>H. chrysanthus</i> | NKXS01001146.1 | 110454 | 0.04 |
| <i>H. chrysanthus</i> | NKXS01002716.1 | 15100  | 0.04 |
| <i>H. chrysanthus</i> | NKXS01002232.1 | 13314  | 0.04 |
| <i>H. chrysanthus</i> | NKXS01003134.1 | 66331  | 0.04 |
| <i>H. chrysanthus</i> | NKXS01000484.1 | 137236 | 0.04 |
| <i>H. chrysanthus</i> | NKXS01000905.1 | 141450 | 0.04 |
| <i>H. chrysanthus</i> | NKXS01000172.1 | 90533  | 0.04 |
| <i>H. chrysanthus</i> | NKXS01003849.1 | 35892  | 0.04 |
| <i>H. chrysanthus</i> | NKXS01003849.1 | 35919  | 0.04 |
| <i>H. chrysanthus</i> | NKXS01000077.1 | 20334  | 0.04 |
| <i>H. chrysanthus</i> | NKXS01006043.1 | 30418  | 0.04 |
| <i>H. chrysanthus</i> | NKXS01007685.1 | 16114  | 0.04 |
| <i>H. chrysanthus</i> | NKXS01001570.1 | 17963  | 0.04 |
| <i>H. chrysanthus</i> | NKXS01000973.1 | 10713  | 0.04 |
| <i>H. chrysanthus</i> | NKXS01000157.1 | 168141 | 0.04 |
| <i>H. chrysanthus</i> | NKXS01001306.1 | 61562  | 0.04 |
| <i>H. chrysanthus</i> | NKXS01009259.1 | 13463  | 0.04 |
| <i>H. chrysanthus</i> | NKXS01000576.1 | 79953  | 0.04 |
| <i>H. chrysanthus</i> | NKXS01000905.1 | 141535 | 0.04 |
| <i>H. chrysanthus</i> | NKXS01005172.1 | 46058  | 0.04 |
| <i>H. chrysanthus</i> | NKXS01007359.1 | 1731   | 0.04 |
| <i>H. chrysanthus</i> | NKXS01003823.1 | 44806  | 0.04 |
| <i>H. chrysanthus</i> | NKXS01004475.1 | 3529   | 0.04 |
| <i>H. chrysanthus</i> | NKXS01002486.1 | 9650   | 0.04 |
| <i>H. chrysanthus</i> | NKXS01003294.1 | 76899  | 0.04 |
| <i>H. chrysanthus</i> | NKXS01004469.1 | 18947  | 0.04 |
| <i>H. chrysanthus</i> | NKXS01000858.1 | 21551  | 0.04 |
| <i>H. chrysanthus</i> | NKXS01001200.1 | 86356  | 0.04 |
| <i>H. chrysanthus</i> | NKXS01006762.1 | 15987  | 0.04 |
| <i>H. chrysanthus</i> | NKXS01000353.1 | 159071 | 0.04 |
| <i>H. chrysanthus</i> | NKXS01003124.1 | 1628   | 0.04 |
| <i>H. chrysanthus</i> | NKXS01001687.1 | 27930  | 0.04 |
| <i>H. chrysanthus</i> | NKXS01004838.1 | 2368   | 0.04 |

|                       |                |        |      |
|-----------------------|----------------|--------|------|
| <i>H. chrysanthus</i> | NKXS01000087.1 | 12836  | 0.04 |
| <i>H. chrysanthus</i> | NKXS01003743.1 | 18335  | 0.04 |
| <i>H. chrysanthus</i> | NKXS01004535.1 | 13520  | 0.04 |
| <i>H. chrysanthus</i> | NKXS01005273.1 | 31497  | 0.04 |
| <i>H. chrysanthus</i> | NKXS01000175.1 | 58186  | 0.04 |
| <i>H. chrysanthus</i> | NKXS01007911.1 | 19617  | 0.04 |
| <i>H. chrysanthus</i> | NKXS01001292.1 | 20711  | 0.04 |
| <i>H. chrysanthus</i> | NKXS01002427.1 | 33555  | 0.04 |
| <i>H. chrysanthus</i> | NKXS01006232.1 | 47188  | 0.04 |
| <i>H. chrysanthus</i> | NKXS01000016.1 | 30527  | 0.04 |
| <i>H. chrysanthus</i> | NKXS01003889.1 | 15377  | 0.04 |
| <i>H. chrysanthus</i> | NKXS01003889.1 | 15612  | 0.04 |
| <i>H. chrysanthus</i> | NKXS01004539.1 | 1399   | 0.04 |
| <i>H. chrysanthus</i> | NKXS01000814.1 | 20699  | 0.04 |
| <i>H. chrysanthus</i> | NKXS01008945.1 | 1919   | 0.04 |
| <i>H. chrysanthus</i> | NKXS01006417.1 | 32127  | 0.04 |
| <i>H. chrysanthus</i> | NKXS01006417.1 | 32177  | 0.04 |
| <i>H. chrysanthus</i> | NKXS01007550.1 | 14773  | 0.04 |
| <i>H. chrysanthus</i> | NKXS01003932.1 | 39065  | 0.04 |
| <i>H. chrysanthus</i> | NKXS01006417.1 | 32122  | 0.04 |
| <i>H. chrysanthus</i> | NKXS01005457.1 | 40572  | 0.04 |
| <i>H. chrysanthus</i> | NKXS01000576.1 | 79951  | 0.04 |
| <i>H. chrysanthus</i> | NKXS01005030.1 | 19276  | 0.04 |
| <i>H. chrysanthus</i> | NKXS01005553.1 | 4190   | 0.04 |
| <i>H. chrysanthus</i> | NKXS01010569.1 | 4831   | 0.04 |
| <i>H. chrysanthus</i> | NKXS01000463.1 | 121488 | 0.04 |
| <i>H. chrysanthus</i> | NKXS01004311.1 | 23436  | 0.04 |
| <i>H. chrysanthus</i> | NKXS01004369.1 | 11377  | 0.04 |
| <i>H. chrysanthus</i> | NKXS01001459.1 | 105484 | 0.04 |
| <i>H. chrysanthus</i> | NKXS01007685.1 | 16115  | 0.04 |
| <i>H. chrysanthus</i> | NKXS01003271.1 | 69731  | 0.04 |
| <i>H. chrysanthus</i> | NKXS01000189.1 | 23465  | 0.04 |
| <i>H. chrysanthus</i> | NKXS01003134.1 | 66350  | 0.04 |
| <i>H. chrysanthus</i> | NKXS01003867.1 | 51842  | 0.04 |

---
